# Supplementary material for: Integration of DNA Copy Number Alterations and Transcriptional Expression Analysis in Human Gastric Cancer
Source: PubMed Central journal article supplement (PMC3335165; doi:10.1371/journal.pone.0029824), 2012-04-23
Supplement: pone.0029824.s006.pdf [file pone.0029824.s006.pdf]

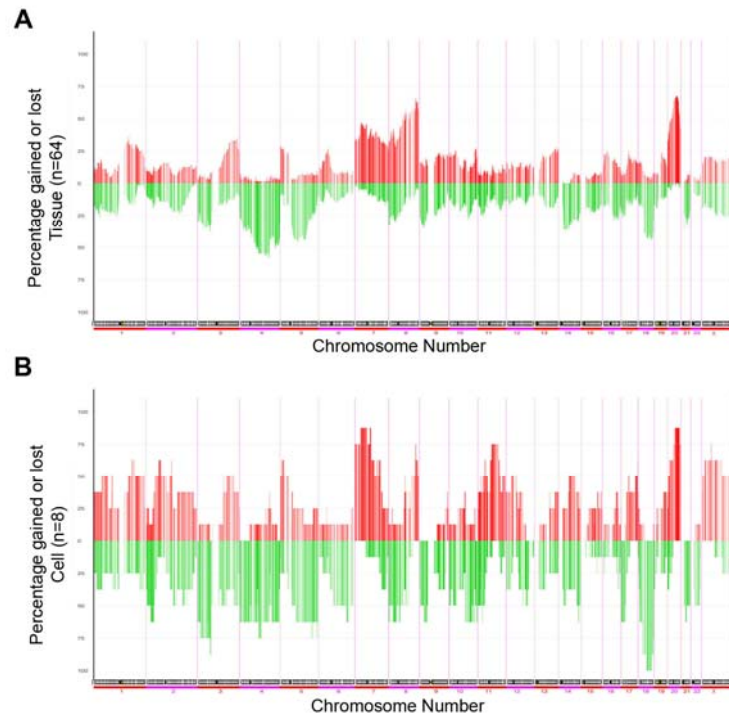

Figure S6. DNA copy number variations in gastric cancer tumors or cell lines. Data presented are ordered by chromosomal map position of the clones. Lower green bars represent losses or deletions, and the upper red bars represent gains or amplifications. (A) Tissue samples. (B) Cell lines.
