# Supplementary material for: Integration of DNA Copy Number Alterations and Transcriptional Expression Analysis in Human Gastric Cancer
Source: PubMed Central journal article supplement (PMC3335165; doi:10.1371/journal.pone.0029824), 2012-04-23
Supplement: pone.0029824.s011.pdf [file pone.0029824.s011.pdf]

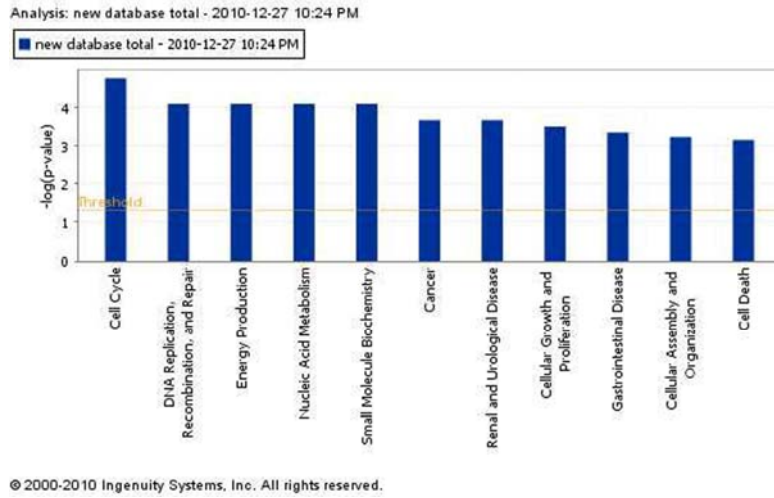

Figure S11. Top biological functions of candidate genes identified by the ingenuity pathway analysis.
