# Supplementary material for: Integration of DNA Copy Number Alterations and Transcriptional Expression Analysis in Human Gastric Cancer
Source: PubMed Central journal article supplement (PMC3335165; doi:10.1371/journal.pone.0029824), 2012-04-23
Supplement: pone.0029824.s012.pdf [file pone.0029824.s012.pdf]

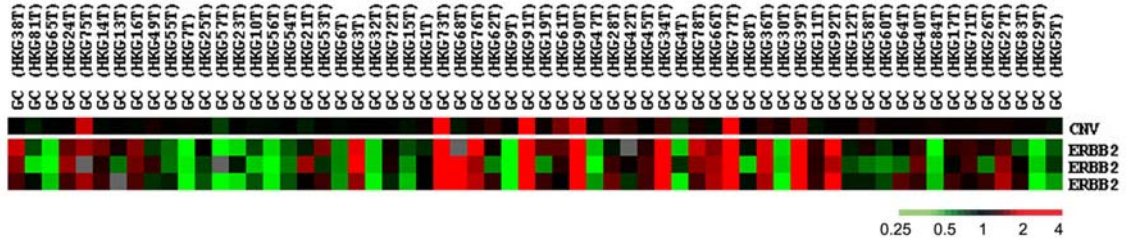

Figure S12. Compared ERBB2 expression values with the corresponding DNA copy number changes in 62 gastric cancer samples.
