# Supplementary material for: Integration of DNA Copy Number Alterations and Transcriptional Expression Analysis in Human Gastric Cancer
Source: PubMed Central journal article supplement (PMC3335165; doi:10.1371/journal.pone.0029824), 2012-04-23
Supplement: pone.0029824.s016.pdf [file pone.0029824.s016.pdf]

Table S4. Loci exhibiting high-level amplification or possible homozygous deletion.

| Alteration                 | Locus           | Clone name               | Frequency | Candidate gene                                                                                                                                                         |
|----------------------------|-----------------|--------------------------|-----------|------------------------------------------------------------------------------------------------------------------------------------------------------------------------|
| High-level amplification * | 1q31            | RP11-243M13              | 3/72      | <i>SSA2, C1orf37, COX2, CNTN2, RBBP5, MDM4, LRRN5, jun, CYP2J</i>                                                                                                      |
|                            | 5p15.2          | RP11-35K22, CTD-2040C2   | 5/72      | <i>TRIO, CTNND2, DNAH5</i>                                                                                                                                             |
|                            | 5p15.3          | RP11-94J21, RP11-58A5    | 5/72      |                                                                                                                                                                        |
|                            | 5p14.3-5p15.1   | RP11-88L18               | 3/72      | <i>BASP1, CDH12, MLV12</i>                                                                                                                                             |
|                            | 5p13.2          | RP11-253B9               | 3/72      | <i>SKP2, SLC1A3, GDNF, IL7R, CAPSL, NUP155, WDR70, AMACR, RAD1</i>                                                                                                     |
|                            | 6p21.1          | RP11-91H14               | 4/72      | <i>CDC5L, TNF, Cip1, PIM1, PPP2R5D, CCND3, HGNC, MRLP14, HSPCB, NFKBIE, EGFL, RPL7L1, TRERF1, MRPL2, BYSL, MEA1, CCK-4, SRF, VEGF, PTK7, C6orf223, TMEM63B, CAPN11</i> |
|                            | 7p12            | RP11-183O1, RP11-15L23   | 4/72      | <i>EGFR, ABCA13, ERBB1</i>                                                                                                                                             |
|                            | 7q21.12-7q21.13 | CTB-102E19, CTB-141D22   | 3/72      | <i>CDK6, AKAP9, CYP51A1, ABCB1, ABCB4, SRI, TP53API, PGY1, HGF</i>                                                                                                     |
|                            | 7q21.2-7q21.3   | CTD-2074H8, RP11-127F3   | 5/72      | <i>SMURF1, MCM7, PEG10</i>                                                                                                                                             |
|                            | 7q31.2-7q31.31  | CTB-185C18               | 3/72      | <i>MET, CFTR, Wnt2</i>                                                                                                                                                 |
|                            | 8p22            | RP11-112G9               | 3/72      | <i>CTSB</i>                                                                                                                                                            |
|                            | 8p23.1          | RP11-235I5               | 3/72      | <i>C8orf12, C8orf13, C8orf14, C8orf49, BLK, GATA4, NEIL2, MASL1, TNKS, MFHAS1, DEFA4, DLCL1, CTSB</i>                                                                  |
|                            | 8q23.1          | CTD-2013D21              | 3/72      |                                                                                                                                                                        |
|                            | 8q24.1          | RP11-128G18, RP11-145G10 | 7/72      | <i>ZHX2, EXT1, ATAD2, NOV, OPG</i>                                                                                                                                     |

|                    |                             |      |                                                                                                                                                                                                                                                                                                                                                                                                                                                                         |
|--------------------|-----------------------------|------|-------------------------------------------------------------------------------------------------------------------------------------------------------------------------------------------------------------------------------------------------------------------------------------------------------------------------------------------------------------------------------------------------------------------------------------------------------------------------|
| 8q24.12-<br>8q24.2 | RP11-110D15                 | 6/72 | <i>ENPP2, ZHX2, MRPL13, MTBP, SNTB, SAMD12, TRIB1, RNF139, PRO2000, SQLE, KIAA0196, HAS2</i>                                                                                                                                                                                                                                                                                                                                                                            |
| 8q24.2             | RP11-237F24,<br>RP11-184M21 | 6/72 | <i>MYC, PVT1, TG, DDEF1, SLA, MLZE, DDEF1, WISP1, NDRG1</i>                                                                                                                                                                                                                                                                                                                                                                                                             |
| 10q26.1            | RP11-7P17                   | 3/72 | <i>KSAM/FGFR2</i>                                                                                                                                                                                                                                                                                                                                                                                                                                                       |
| 11p12-<br>11p13    | RP11-90F13                  | 5/72 | <i>C11orf69, Q3C1V1, CD59, FBXO3, LMO2, CAPRIN1, LRRC4C, TRAF6, COMMMD9, TRIM44, FJX1, CD44, PDHX, APIP, PKY/HIPK3, LMO2</i>                                                                                                                                                                                                                                                                                                                                            |
| 11p14              | RP11-16H3,<br>RP11-1L12     | 4/72 | <i>GAS2</i>                                                                                                                                                                                                                                                                                                                                                                                                                                                             |
| 11q21              | RP11-163O18                 | 3/72 | <i>MAML2</i>                                                                                                                                                                                                                                                                                                                                                                                                                                                            |
| 11q22.2            | CTD-<br>2039C11             | 3/72 | <i>BIRC2, MMP1, MMP8, MMP10, MMP8, MMP13, YAP1, CASP4</i>                                                                                                                                                                                                                                                                                                                                                                                                               |
| 11q23.1            | CTD-<br>2222B22             | 3/72 | <i>MLL, POU2AF1</i>                                                                                                                                                                                                                                                                                                                                                                                                                                                     |
| 17q11.2-<br>17q12  |                             | 5/72 | <i>TOP2A, GPR2, ERBB2/HER2, ZNF207, MLN62, Pip4k2<math>\beta</math>, TRAF4 CPD, LASP1, SUPT6H, POLDIP2, FLOT2, PIGS, SARMI, PCFT, TIAF1, ERAL1, SEZ6, FLJ00234, TMEM97, TP53I13, CRYBA1, DHRS13, LOC201229, GIT1, NUFIP2, PIPOX, PHF12, ALDOC, RAB34, IFT20, UNC119, NLK, C17orf63, NEK8, SLC13A2, SDF2, FLJ00295, PROCA1, DKFZp547N203, FOXN1, TLCDI, VTN, RPL23A, SPAG5, FLJ40504, LOC116236, MYO18A, UNQ419, BCOX, TNFAIP1, TAOK1, SEBOX, C17orf32, ACCN1, MLLT6</i> |

|                     |                                |       |                                                                                                                                                                                                                                                                                |
|---------------------|--------------------------------|-------|--------------------------------------------------------------------------------------------------------------------------------------------------------------------------------------------------------------------------------------------------------------------------------|
| 17q12-<br>17q21     | RP11-87N6                      | 3/72  | <i>PPP1R1B/DARPP32, RAPGEFL1, MLN 64/ TRAF4/ STARD3, MLN50, PPARBP/ TRAP220, GRB7, PEX12, NEUROD2, PERLD1, PLXDC1, CACNB1, RPL19, HSD17B1, THRA/ERBA1, RARA, MLN51, IGFBP4, WT4, CCR7, CDC6, ZNF144, CCL8, CCL1, CCL2, CCL11, CCL7, CCL13, AATF, TBC1D3</i>                    |
| 17q21.1-<br>17q21.2 | CTD2009O18,<br>CTD-2094C6      | 5/72  | <i>Keratin familys, GAST</i>                                                                                                                                                                                                                                                   |
| 17q21-<br>17q22     | GS-265E19                      | 3/72  | <i>SGCA, HOXB7, FLJ13855, EAP30, PHB, PPP1R9B, FHF3/RHO7, NGFR, SHCL1, NME1/NM23, NME2, GIP, ZNF147, ABCC3, RPS6KB1, ABC1, KIF2B, GOSR2, NDP52, TOMIL1, COX11, ITGA3, PPP1R9B, PDK2, MYST2, COL1A1, FAMI17A, TAC4, DLX3, TMEM92, DLX4, SAMD14, SGCA, HILS1, FLJ42842, CA10</i> |
| 19p11-<br>19q11     | RP11-206O6,<br>RP11-110J19     | 6/72  |                                                                                                                                                                                                                                                                                |
| 19q11-<br>19q12     | RP11-152P7,<br>CTB-25O22       | 8/72  | <i>VCC-1, UQCRFS1,</i>                                                                                                                                                                                                                                                         |
| 19q12-<br>19q13.1   | RP11-46I12                     | 6/72  | <i>CCNE1, C19orf12, HPN/HEPSIN, SPINT2, Cyclin E/CCNE, CEBPA, TGFB1, BCL3, OZF, SEI-1, MLL2, ACTN4, PD2/hPaf1, AKT2, Mirk/ Dyrk1B</i>                                                                                                                                          |
| 20q12               | RP11-93L19,<br>RP11-30F23      | 7/72  | <i>AIB1/ ACTR/ RAC3/ TRAM-1/ p/CIP/ SRC-3,</i>                                                                                                                                                                                                                                 |
| 20q12-<br>20q13.1   | RP11-169A6,<br>CTD-<br>2031K20 | 12/72 | <i>SLPI, HE4, TOP1, CAS, MYBL2</i>                                                                                                                                                                                                                                             |

|                                     |                     |                           |       |                                                                                                                                                                                 |
|-------------------------------------|---------------------|---------------------------|-------|---------------------------------------------------------------------------------------------------------------------------------------------------------------------------------|
|                                     | 20q13.1-<br>20q13.2 | GS-236D3,<br>RP11-172C21  | 11/72 | <i>C20orf17, ZNF217, BCAS1,<br/>PTPN1, LOC284751,<br/>KIAA0611, ATP9A, BCAS1,<br/>CYP24, PFDN4, CSE1L,<br/>NCOA3, BMP7, RAB22A,<br/>STK4, C20orf121, BCAS4,<br/>SULF2, EYA2</i> |
|                                     | 20q13.2-<br>20q13.3 | GS-32I19,<br>RP11-1E23    | 6/72  | <i>BTAK/STK15/STK6, TFAP2C,<br/>NABC1, GNAS, ADRM1,<br/>AURKA</i>                                                                                                               |
|                                     | Xp22.1              | RP11-48D14,<br>CTD-2033A1 | 3/72  |                                                                                                                                                                                 |
|                                     | Xp22.2              | RP11-2K15,<br>RP11-128B23 | 4/72  |                                                                                                                                                                                 |
|                                     | Xp22.3              | RP4-677N1                 | 3/72  |                                                                                                                                                                                 |
| Homozygous<br>deletion <sup>#</sup> | 3p14                | RP11-94D19                | 5/72  | <i>PTPRG, PTPγ,</i>                                                                                                                                                             |
|                                     | 3p14.2              | CTB-1O12                  | 5/72  | <i>FHIT</i>                                                                                                                                                                     |
|                                     | 3p14.3              | CTD-<br>2175D15           | 3/72  | <i>WNT5A, TU3A</i>                                                                                                                                                              |
|                                     | 4p12-13             | RP11-24G16                | 3/72  | <i>PHOX2B, LOC401131, HUEL,<br/>UGT2B17</i>                                                                                                                                     |
|                                     | 4p16.2              | RP11-7A6                  | 3/72  | <i>DOK7</i>                                                                                                                                                                     |
|                                     | 4q22                | RP11-49M7                 | 3/72  | <i>UNC5C, GRID2, DRLM, LIM,<br/>ALK6, RAPI, DAPP1, MPI,<br/>TMSL3</i>                                                                                                           |
|                                     | 4q28                | RP11-40D5                 | 3/72  |                                                                                                                                                                                 |
|                                     | 5p14.3-<br>15.1     | RP11-88L18                | 4/72  | <i>CDH6, CDH10, NKD2,<br/>CDH18</i>                                                                                                                                             |
|                                     | 5q11.2              | RP11-22L20                | 3/72  | <i>MEKK1, BACTIL, hMSH3,<br/>PDE4D, MAP3K1, LOC54505,<br/>GZMK, GZMA, CKN1</i>                                                                                                  |
|                                     | 5q12                | RP11-19I19                | 5/72  | <i>LY64, PART-1</i>                                                                                                                                                             |
|                                     | 5q13                | CTB-134O19                | 3/72  | <i>F2RL1, F2R, RAD17, PIK3R1</i>                                                                                                                                                |
|                                     | 8p12                | RP11-57I3,<br>RP11-210F15 | 3/72  | <i>VDAC3, sFRP1, FRP1/FRZB,<br/>WRN, NRG1</i>                                                                                                                                   |
|                                     | 8p21.2              | RP11-76B12                | 3/72  | <i>FEZ, DR5, NKX3, CLU,<br/>TNFRSF10B, KAI1, NKX3.1,</i>                                                                                                                        |

|             |                          |      |                                                                                                     |
|-------------|--------------------------|------|-----------------------------------------------------------------------------------------------------|
|             |                          |      | <i>NEFL, LPL, BNIP3L, PPP2R2A, DOCK5, RHOBTB2</i>                                                   |
| 8p23.1      | RP11-122N11              | 3/72 | <i>DEFB105A, DEFB106A, LPTS, DLC1, PinX1, CSMD1, GATA4, FDFT1, NEIL2</i>                            |
| 8p23.3      | RP11-82K8                | 3/72 | <i>DLGAP2, FBOXO25, ARHGEF10, KBTBD11</i>                                                           |
| 8ptel       | GS1-77L23                | 4/72 |                                                                                                     |
| 9p21        | CTB-65D18, RP11-235F7    | 8/72 | <i>p16/INK4A/CDKN2A, p14ARF, p15/CDKN2B, 189G21T7, D9S171, TLE1, PTENP1, IFNA, MTAP, TEK, MLLT3</i> |
| 11p15.1     | RP11-56J22               | 3/72 | <i>KIP2, BGLOB, WEE, TSG101, CDKN1C /p57KIP2</i>                                                    |
| 16q23       | RP11-61L1, RP11-284G2    | 5/72 | <i>FOR/WWOX/WOX, WI2755/FRA16D, ADAMTS18, TERF21P, ATBF1</i>                                        |
| 18q12       | RP11-104N11              | 5/72 |                                                                                                     |
| 18q12-21    | RP11-19L3                | 3/72 | <i>NPM1P1, PIK3C3, RIT2SYT4, SETBP1, SLC14A2, SLC14A1, CD33L3, KIAA1632, PSTPIP2</i>                |
| 18q21       | RP11-43K24, RP11-729G3   | 4/72 | <i>OPC4, MBD2, ME2, ELAC1, CDH20, MALT1, GRP, FVT1, SERPINB5/PI5, SERPINB13, SERPINB4, SERPINB3</i> |
| 18q21.1     | VYSIS-DPC4?              | 3/72 | <i>MADH4/DPC4/SMAD4, MADR2 /SMAD2/JV18-1, DCC, MADH7/SMAD7, LOC390855</i>                           |
| 18q22       | RP11-748M14, RP11-105L16 | 6/72 | <i>CDH19, CADH-7, BCL2, DOK6, CD226, RTTN, CBLN2, NETO1, TMX3, CCDC102B</i>                         |
| 18q22-18q23 | RP11-49H23, RP11-57F7    | 4/72 | <i>DNAM-1, CTDP1</i>                                                                                |
| 18q23       | RP11-64C15, RP11-130J1   | 5/72 | <i>SOCS6, GALR1, MBP</i>                                                                            |
| 18qtel      | RP11-507P3               | 3/72 | <i>CTDP1</i>                                                                                        |

|                     |           |      |                                                                                                                         |
|---------------------|-----------|------|-------------------------------------------------------------------------------------------------------------------------|
| 21q11.1-<br>21q11.2 | RP11-31B6 | 4/72 | <i>LIPI, RBM11, STCH,<br/>SAMSNI, NRIP1, USP25,<br/>C21orf34, CXADR,<br/>BTG3/ANA, C21orf91,<br/>CHODL, PRSS7, JAM2</i> |
| 21q21               | RP11-15H6 | 3/72 | <i>ANA, ADAMTS5, ADAMTS1,<br/>BTG3, MIRN99A,<br/>MIRN125B2, MIRNLET7C,<br/>USP25, YG81, BIC</i>                         |
| 21q22.2-<br>21q22.3 | RP11-1P3  | 3/72 | <i>TMPRSS2, COL6A1, DSCAM,<br/>BACE2, PLAC4</i>                                                                         |

---

\* Log2 > 0.8. # Log2 < -0.7.
