# Supplementary material for: Integration of DNA Copy Number Alterations and Transcriptional Expression Analysis in Human Gastric Cancer
Source: PubMed Central journal article supplement (PMC3335165; doi:10.1371/journal.pone.0029824), 2012-04-23
Supplement: pone.0029824.s018.pdf [file pone.0029824.s018.pdf]

Table S6. Candidate oncogenes and tumor suppressor genes identified by correlating expression arrays with aCGH data.

| Genes that are up-regulated and are frequently gained in human GCs |     |                    |                                 |             |     |                    |                                 |
|--------------------------------------------------------------------|-----|--------------------|---------------------------------|-------------|-----|--------------------|---------------------------------|
| Gene Symbol                                                        | Chr | Percentage Gained* | Fold Up Regulation <sup>#</sup> | Gene Symbol | Chr | Percentage Gained* | Fold Up Regulation <sup>#</sup> |
| RNF115                                                             | 1   | 17.74              | 1.41                            | ESRP1       | 8   | 17.74              | 1.41                            |
| BCL9                                                               | 1   | 17.74              | 1.33                            | PTDSS1      | 8   | 19.35              | 1.52                            |
| SF3B4                                                              | 1   | 20.97              | 1.6                             | MTDH        | 8   | 19.35              | 2.06                            |
| ANP32E                                                             | 1   | 20.97              | 2.22                            | LAPTM4B     | 8   | 19.35              | 1.55                            |
| TARS2                                                              | 1   | 20.97              | 1.52                            | STK3        | 8   | 19.35              | 1.82                            |
| PRUNE                                                              | 1   | 20.97              | 1.36                            | COX6C       | 8   | 19.35              | 1.38                            |
| S100A7                                                             | 1   | 20.97              | 1.51                            | AZIN1       | 8   | 24.19              | 1.65                            |
| ILF2                                                               | 1   | 20.97              | 1.69                            | SLC25A32    | 8   | 24.19              | 1.56                            |
| SLC39A1                                                            | 1   | 20.97              | 1.62                            | NUDCD1      | 8   | 24.19              | 2.08                            |
| TPM3                                                               | 1   | 20.97              | 1.52                            | RAD21       | 8   | 25.81              | 1.8                             |
| UBE2Q1                                                             | 1   | 20.97              | 1.28                            | DSCC1       | 8   | 25.81              | 1.56                            |
| FLAD1                                                              | 1   | 20.97              | 1.6                             | MRPL13      | 8   | 25.81              | 1.83                            |
| EFNA1                                                              | 1   | 20.97              | 1.37                            | DERL1       | 8   | 30.65              | 1.27                            |
| GBA                                                                | 1   | 20.97              | 1.29                            | ATAD2       | 8   | 30.65              | 2.58                            |
| FAM189B                                                            | 1   | 20.97              | 1.39                            | FAM91A1     | 8   | 30.65              | 2.6                             |
| ASH1L                                                              | 1   | 20.97              | 1.51                            | PVT1        | 8   | 40.32              | 2.11                            |
| MSTO1                                                              | 1   | 20.97              | 1.33                            | FAM49B      | 8   | 37.1               | 1.92                            |
| DAP3                                                               | 1   | 20.97              | 1.6                             | ASAP1       | 8   | 37.1               | 1.85                            |
| SMG5                                                               | 1   | 20.97              | 1.41                            | PHF20L1     | 8   | 37.1               | 1.43                            |
| GPATCH4                                                            | 1   | 20.97              | 1.37                            | EIF2C2      | 8   | 35.48              | 1.37                            |
| MRPL24                                                             | 1   | 20.97              | 1.31                            | PTK2        | 8   | 37.1               | 1.52                            |
| NUF2                                                               | 1   | 20.97              | 2.17                            | RHPN1       | 8   | 35.48              | 1.54                            |
| UCK2                                                               | 1   | 20.97              | 1.53                            | PUF60       | 8   | 35.48              | 1.6                             |
| CREG1                                                              | 1   | 22.58              | 1.88                            | GRINA       | 8   | 35.48              | 2.22                            |
| CACYBP                                                             | 1   | 19.35              | 2.1                             | EXOSC4      | 8   | 35.48              | 1.29                            |
| STX6                                                               | 1   | 17.74              | 1.44                            | C8orf30A    | 8   | 35.48              | 1.44                            |
| SMG7                                                               | 1   | 19.35              | 1.31                            | FBXL6       | 8   | 35.48              | 1.58                            |
| ARPC5                                                              | 1   | 19.35              | 1.6                             | RECQL4      | 8   | 35.48              | 2.07                            |
| TPR                                                                | 1   | 19.35              | 1.47                            | ARHGAP39    | 8   | 35.48              | 1.78                            |
| ZNF281                                                             | 1   | 16.13              | 1.75                            | C8orf33     | 8   | 35.48              | 1.65                            |
| KIF21B                                                             | 1   | 16.13              | 1.39                            | SETX        | 9   | 16.13              | 1.44                            |
| IPO9                                                               | 1   | 16.13              | 1.62                            | NOTCH1      | 9   | 20.97              | 2.41                            |
| ARL8A                                                              | 1   | 16.13              | 1.3                             | GTPBP4      | 10  | 11.29              | 1.97                            |
| UBE2T                                                              | 1   | 14.52              | 2.06                            | PFKP        | 10  | 12.9               | 1.4                             |
| KDM5B                                                              | 1   | 14.52              | 1.3                             | TAF3        | 10  | 11.29              | 1.31                            |
| SNRPE                                                              | 1   | 14.52              | 1.82                            | UPF2        | 10  | 12.9               | 1.51                            |
| NUCKS1                                                             | 1   | 14.52              | 1.46                            | NUDT5       | 10  | 12.9               | 1.46                            |
| CD46                                                               | 1   | 16.13              | 1.85                            | CDC123      | 10  | 12.9               | 1.52                            |
| TRAF5                                                              | 1   | 16.13              | 1.51                            | SEPHS1      | 10  | 11.29              | 1.49                            |
| NEK2                                                               | 1   | 14.52              | 1.71                            | CD9         | 10  | 11.29              | 1.59                            |
| SMYD2                                                              | 1   | 14.52              | 1.59                            | MLLT10      | 10  | 9.68               | 1.35                            |

|          |   |       |      |          |    |       |      |
|----------|---|-------|------|----------|----|-------|------|
| CENPF    | 1 | 14.52 | 2.83 | BMI1     | 10 | 11.29 | 1.8  |
| LYPLAL1  | 1 | 12.9  | 1.47 | WAC      | 10 | 11.29 | 1.4  |
| IARS2    | 1 | 12.9  | 2.14 | MAP3K8   | 10 | 11.29 | 1.59 |
| TAF1A    | 1 | 12.9  | 1.62 | KIF5B    | 10 | 11.29 | 1.56 |
| CNIH4    | 1 | 16.13 | 1.34 | PARD3    | 10 | 12.9  | 1.35 |
| LBR      | 1 | 14.52 | 2.19 | METTL10  | 10 | 12.9  | 1.46 |
| LIN9     | 1 | 14.52 | 2.08 | BCCIP    | 10 | 12.9  | 1.58 |
| PARP1    | 1 | 14.52 | 1.8  | GLRX3    | 10 | 11.29 | 1.61 |
| ABCB10   | 1 | 14.52 | 1.46 | DYRK2    | 12 | 8.06  | 1.31 |
| C1orf198 | 1 | 14.52 | 2.07 | RAP1B    | 12 | 8.06  | 1.33 |
| TSNAX    | 1 | 14.52 | 1.66 | NUP107   | 12 | 8.06  | 2    |
| C1orf31  | 1 | 12.9  | 1.42 | MDM2     | 12 | 8.06  | 1.69 |
| TARBP1   | 1 | 12.9  | 1.48 | CPSF6    | 12 | 9.68  | 1.72 |
| IRF2BP2  | 1 | 12.9  | 1.68 | FRS2     | 12 | 9.68  | 1.27 |
| CHML     | 1 | 12.9  | 1.54 | RAB3IP   | 12 | 9.68  | 1.49 |
| ADSS     | 1 | 11.29 | 1.66 | POMP     | 13 | 14.52 | 1.59 |
| FAM36A   | 1 | 11.29 | 1.74 | SLC7A1   | 13 | 14.52 | 1.45 |
| AHCTF1   | 1 | 11.29 | 1.93 | RFC3     | 13 | 11.29 | 2.03 |
| LAPTM4A  | 2 | 12.9  | 1.38 | C13orf23 | 13 | 11.29 | 1.52 |
| DHX57    | 2 | 14.52 | 1.46 | DGKH     | 13 | 11.29 | 1.95 |
| VPS54    | 2 | 8.06  | 1.33 | NUFIP1   | 13 | 11.29 | 1.54 |
| RUVBL1   | 3 | 9.68  | 2.07 | ZC3H13   | 13 | 11.29 | 1.49 |
| RAB7A    | 3 | 11.29 | 1.43 | RNASEH2B | 13 | 17.74 | 1.55 |
| CDV3     | 3 | 9.68  | 1.39 | PIBF1    | 13 | 12.9  | 1.75 |
| ATP1B3   | 3 | 12.9  | 2.36 | TGDS     | 13 | 14.52 | 1.49 |
| HPS3     | 3 | 16.13 | 1.71 | RAP2A    | 13 | 14.52 | 1.65 |
| CP       | 3 | 16.13 | 1.47 | IPO5     | 13 | 14.52 | 1.64 |
| GFM1     | 3 | 16.13 | 1.6  | DOCK9    | 13 | 14.52 | 1.93 |
| ECT2     | 3 | 17.74 | 3.66 | ING1     | 13 | 17.74 | 1.49 |
| ACTL6A   | 3 | 17.74 | 2.03 | ANKRD10  | 13 | 17.74 | 1.99 |
| FXR1     | 3 | 17.74 | 1.84 | ATP11A   | 13 | 19.35 | 1.92 |
| DVL3     | 3 | 19.35 | 1.49 | CUL4A    | 13 | 19.35 | 1.51 |
| ECE2     | 3 | 19.35 | 1.78 | TFDP1    | 13 | 14.52 | 1.79 |
| EIF4G1   | 3 | 19.35 | 1.48 | MED1     | 17 | 17.74 | 1.57 |
| CLCN2    | 3 | 19.35 | 1.49 | CDK12    | 17 | 17.74 | 1.56 |
| MAGEF1   | 3 | 19.35 | 1.32 | GRB7     | 17 | 17.74 | 1.44 |
| RFC4     | 3 | 19.35 | 2.03 | PSMD3    | 17 | 12.9  | 1.59 |
| PPP1R2   | 3 | 17.74 | 1.27 | CDC6     | 17 | 12.9  | 1.99 |
| FBXO45   | 3 | 17.74 | 1.83 | TOP2A    | 17 | 12.9  | 2.27 |
| SENP5    | 3 | 17.74 | 1.77 | KRT23    | 17 | 11.29 | 1.88 |
| CCDC127  | 5 | 29.03 | 1.26 | ACLY     | 17 | 14.52 | 1.64 |
| PDCD6    | 5 | 29.03 | 1.36 | EFTUD2   | 17 | 11.29 | 1.33 |
| TRIP13   | 5 | 29.03 | 1.83 | PHB      | 17 | 11.29 | 1.33 |
| NKD2     | 5 | 29.03 | 1.53 | MED13    | 17 | 12.9  | 1.51 |
| SLC12A7  | 5 | 29.03 | 1.33 | TANC2    | 17 | 12.9  | 1.36 |
| LPCAT1   | 5 | 29.03 | 2.17 | PRKCA    | 17 | 11.29 | 1.33 |

|              |   |       |      |           |    |       |      |
|--------------|---|-------|------|-----------|----|-------|------|
| MED10        | 5 | 22.58 | 1.27 | NOL11     | 17 | 11.29 | 1.71 |
| NSUN2        | 5 | 22.58 | 1.82 | FDXR      | 17 | 11.29 | 1.51 |
| PAPD7        | 5 | 22.58 | 1.34 | SUMO2     | 17 | 11.29 | 1.38 |
| FAM173B      | 5 | 22.58 | 1.34 | RBCK1     | 20 | 27.42 | 1.45 |
| CCT5         | 5 | 22.58 | 1.89 | TBC1D20   | 20 | 27.42 | 1.28 |
| TRIO         | 5 | 25.81 | 1.62 | SIRPA     | 20 | 27.42 | 1.84 |
| ANKH         | 5 | 22.58 | 1.87 | STK35     | 20 | 27.42 | 1.33 |
| RNASEN       | 5 | 22.58 | 1.59 | SNRPB     | 20 | 27.42 | 1.39 |
| ZFR          | 5 | 27.42 | 1.82 | MRPS26    | 20 | 27.42 | 1.49 |
| SUB1         | 5 | 27.42 | 1.48 | CDC25B    | 20 | 29.03 | 1.62 |
| RAD1         | 5 | 25.81 | 1.6  | PCNA      | 20 | 25.81 | 1.75 |
| BRIX1        | 5 | 25.81 | 2.33 | GPCPD1    | 20 | 24.19 | 1.53 |
| C5orf33      | 5 | 25.81 | 1.4  | PLCB1     | 20 | 27.42 | 1.34 |
| NIPBL        | 5 | 24.19 | 1.45 | MKKS      | 20 | 27.42 | 1.34 |
| C5orf28      | 5 | 24.19 | 1.31 | ESF1      | 20 | 30.65 | 2.2  |
| MRPS30       | 5 | 24.19 | 1.48 | SNX5      | 20 | 29.03 | 1.49 |
| FLOT1        | 6 | 14.52 | 1.3  | NAA20     | 20 | 30.65 | 1.53 |
| TCF19        | 6 | 14.52 | 1.67 | NANP      | 20 | 35.48 | 1.58 |
| CSNK2B       | 6 | 14.52 | 1.3  | HM13      | 20 | 41.94 | 1.39 |
| MSH5         | 6 | 14.52 | 1.29 | TPX2      | 20 | 41.94 | 3.2  |
| VAR5         | 6 | 14.52 | 1.3  | TM9SF4    | 20 | 38.71 | 1.27 |
| EHMT2        | 6 | 14.52 | 1.3  | PLAGL2    | 20 | 32.26 | 1.59 |
| SNRPC        | 6 | 16.13 | 1.48 | POFUT1    | 20 | 32.26 | 1.88 |
| TOMM6        | 6 | 19.35 | 1.48 | E2F1      | 20 | 41.94 | 1.48 |
| BYSL         | 6 | 19.35 | 1.73 | AHCY      | 20 | 41.94 | 1.39 |
| RPL7L1       | 6 | 19.35 | 1.29 | ITCH      | 20 | 41.94 | 1.45 |
| MEA1         | 6 | 19.35 | 1.27 | PIGU      | 20 | 41.94 | 1.35 |
| CUL7         | 6 | 19.35 | 1.26 | PROCR     | 20 | 41.94 | 1.34 |
| XPO5         | 6 | 20.97 | 1.92 | CPNE1     | 20 | 41.94 | 1.88 |
| CDC5L        | 6 | 17.74 | 1.43 | NFS1      | 20 | 41.94 | 1.54 |
| INTS1        | 7 | 12.9  | 1.37 | RBM39     | 20 | 41.94 | 1.41 |
| EIF3B        | 7 | 11.29 | 1.73 | DLGAP4    | 20 | 41.94 | 1.3  |
| C1GALT1      | 7 | 11.29 | 1.53 | C20orf24  | 20 | 41.94 | 1.46 |
| C1GALT1      | 7 | 11.29 | 1.34 | C20orf117 | 20 | 41.94 | 1.39 |
| MACC1        | 7 | 11.29 | 1.54 | RPN2      | 20 | 41.94 | 1.72 |
| KLHL7        | 7 | 11.29 | 1.69 | BLCAP     | 20 | 40.32 | 1.67 |
| HNRNPA2B1    | 7 | 12.9  | 1.93 | RPRD1B    | 20 | 40.32 | 1.64 |
| CBX3         | 7 | 12.9  | 1.62 | IFT52     | 20 | 41.94 | 1.61 |
| SKAP2        | 7 | 12.9  | 1.65 | MYBL2     | 20 | 41.94 | 2.17 |
| LOC100289444 | 7 | 12.9  | 1.89 | C20orf111 | 20 | 41.94 | 1.4  |
| HOXA13       | 7 | 12.9  | 1.65 | SERINC3   | 20 | 41.94 | 1.68 |
| AVL9         | 7 | 12.9  | 1.82 | YWHAB     | 20 | 41.94 | 1.36 |
| KBTBD2       | 7 | 11.29 | 1.75 | TOMM34    | 20 | 41.94 | 1.36 |
| FKBP9        | 7 | 11.29 | 1.44 | STK4      | 20 | 41.94 | 1.71 |
| STARD3NL     | 7 | 11.29 | 1.6  | UBE2C     | 20 | 41.94 | 2.97 |
| PSMA2        | 7 | 8.06  | 1.43 | TP53RK    | 20 | 41.94 | 1.25 |

|          |   |       |      |            |    |       |      |
|----------|---|-------|------|------------|----|-------|------|
| C7orf44  | 7 | 8.06  | 1.35 | NCOA3      | 20 | 41.94 | 1.68 |
| H2AFV    | 7 | 8.06  | 1.35 | ZNFX1      | 20 | 41.94 | 1.62 |
| PURB     | 7 | 8.06  | 1.47 | NCRNA00275 | 20 | 41.94 | 1.75 |
| IGFBP3   | 7 | 8.06  | 2.62 | RNF114     | 20 | 43.55 | 1.66 |
| TNS3     | 7 | 8.06  | 1.39 | DPM1       | 20 | 41.94 | 1.61 |
| MRPS17   | 7 | 11.29 | 1.6  | ATP9A      | 20 | 41.94 | 1.31 |
| SLC25A40 | 7 | 8.06  | 1.79 | ZNF217     | 20 | 40.32 | 1.51 |
| SRI      | 7 | 8.06  | 1.27 | AURKA      | 20 | 37.1  | 2.36 |
| FZD1     | 7 | 8.06  | 1.27 | C20orf43   | 20 | 37.1  | 1.61 |
| ANKIB1   | 7 | 8.06  | 1.48 | RAE1       | 20 | 37.1  | 1.72 |
| PEX1     | 7 | 8.06  | 1.27 | RBM38      | 20 | 37.1  | 1.47 |
| CDK6     | 7 | 8.06  | 1.55 | PMEPA1     | 20 | 37.1  | 3.05 |
| SAMD9L   | 7 | 8.06  | 1.49 | RAB22A     | 20 | 37.1  | 1.65 |
| CCDC132  | 7 | 8.06  | 1.51 | VAPB       | 20 | 37.1  | 1.37 |
| MCM4     | 8 | 16.13 | 2.14 | VAPB       | 20 | 37.1  | 1.32 |
| UBE2V2   | 8 | 16.13 | 1.56 | STX16      | 20 | 37.1  | 1.79 |
| CHCHD7   | 8 | 16.13 | 1.27 | GNAS       | 20 | 37.1  | 1.32 |
| IMPAD1   | 8 | 16.13 | 1.78 | ATP5E      | 20 | 37.1  | 1.22 |
| SNHG6    | 8 | 17.74 | 1.59 | CDH26      | 20 | 35.48 | 1.8  |
| CSPP1    | 8 | 17.74 | 1.57 | PSMA7      | 20 | 30.65 | 1.66 |
| NCOA2    | 8 | 22.58 | 1.31 | LAMA5      | 20 | 30.65 | 1.78 |
| TRAM1    | 8 | 22.58 | 1.47 | COL9A3     | 20 | 30.65 | 2.01 |
| LACTB2   | 8 | 22.58 | 2.06 | C20orf11   | 20 | 30.65 | 1.4  |
| MRPS28   | 8 | 17.74 | 1.4  | ARFGAP1    | 20 | 30.65 | 1.27 |
| IMPA1    | 8 | 17.74 | 1.78 | SLC2A4RG   | 20 | 33.87 | 1.36 |
| OSGIN2   | 8 | 17.74 | 2.22 | TPD52L2    | 20 | 35.48 | 1.75 |
| NBN      | 8 | 17.74 | 1.96 | PRPF6      | 20 | 35.48 | 1.31 |
| PDP1     | 8 | 17.74 | 1.83 |            |    |       |      |

Genes that are down-regulated and are frequently lost in human GCs

| Gene Symbol | Chr | Percentage Lost* | Fold Down Regulation <sup>#</sup> | Gene Symbol | Chr | Percentage Lost* | Fold Down Regulation <sup>#</sup> |
|-------------|-----|------------------|-----------------------------------|-------------|-----|------------------|-----------------------------------|
| SYTL1       | 1   | 8.06             | 1.75                              | UQCRQ       | 5   | 9.68             | 1.52                              |
| FAM107A     | 3   | 12.9             | 2.27                              | MYO5B       | 18  | 24.19            | 1.58                              |
| S100P       | 4   | 12.9             | 3.48                              | NEDD4L      | 18  | 24.19            | 1.58                              |
| OCIAD2      | 4   | 9.68             | 1.37                              | SEC11C      | 18  | 24.19            | 1.6                               |
| PLAC8       | 4   | 9.68             | 3.27                              | CYB5A       | 18  | 25.81            | 2.1                               |
| IQGAP2      | 5   | 17.74            | 1.48                              | CBR1        | 21  | 11.29            | 2.25                              |

\*Percentage of GC samples with gain or loss at the specific gene loci. <sup>#</sup>Average fold of up-regulation or down-regulation of the gene comparing GC with non-tumor gastric samples.
