# Supplementary material for: Integration of DNA Copy Number Alterations and Transcriptional Expression Analysis in Human Gastric Cancer
Source: PubMed Central journal article supplement (PMC3335165; doi:10.1371/journal.pone.0029824), 2012-04-23
Supplement: pone.0029824.s019.pdf [file pone.0029824.s019.pdf]

Analysis Name: new database total - 2010-12-27 10:24 PM  
 Analysis Creation Date: 2010-12-27  
 IPA version: 8.8 (Release Date: 2010-11-13)  
 Content version: 3204 (Release Date: 2010-10-27)

## Analysis settings

[View](#)

Reference set: Ingenuity Knowledge Base (Genes + Endogenous Chemicals)

Relationship to include: Direct and Indirect

Includes Endogenous Chemicals

Optional Analyses: My Pathways My List

Filter Summary:

Consider only molecules and/or relationships where  
 species = Human

## Top Networks

| ID | Associated Network Functions                                                       | Score |
|----|------------------------------------------------------------------------------------|-------|
| 1  | Cancer, Renal and Urological Disease, Cell Cycle                                   | 29    |
| 2  | Connective Tissue Development and Function, Cancer, Gastrointestinal Disease       | 26    |
| 3  | Cell Cycle, Endocrine System Development and Function, Small Molecule Biochemistry | 21    |
| 4  | Genetic Disorder, Skeletal and Muscular Disorders, Inflammatory Disease            | 2     |



## Top Bio Functions

### Diseases and Disorders

| Name                         | p-value             | # Molecules |
|------------------------------|---------------------|-------------|
| Cancer                       | 2.21E-04 - 4.93E-02 | 18          |
| Renal and Urological Disease | 2.21E-04 - 2.98E-02 | 3           |
| Gastrointestinal Disease     | 4.61E-04 - 3.07E-02 | 10          |
| Genetic Disorder             | 9.47E-04 - 4.13E-02 | 26          |
| Connective Tissue Disorders  | 1.38E-03 - 7.54E-03 | 2           |

### Molecular and Cellular Functions

| Name                                       | p-value             | # Molecules |
|--------------------------------------------|---------------------|-------------|
| Cell Cycle                                 | 1.90E-05 - 4.93E-02 | 12          |
| DNA Replication, Recombination, and Repair | 8.34E-05 - 4.44E-02 | 12          |
| Energy Production                          | 8.34E-05 - 8.34E-05 | 3           |
| Nucleic Acid Metabolism                    | 8.34E-05 - 8.34E-05 | 3           |
| Small Molecule Biochemistry                | 8.34E-05 - 1.75E-02 | 4           |

### Physiological System Development and Function

| Name                                          | p-value             | # Molecules |
|-----------------------------------------------|---------------------|-------------|
| Hematological System Development and Function | 9.47E-04 - 3.47E-02 | 4           |
| Hematopoiesis                                 | 9.47E-04 - 3.47E-02 | 3           |
| Connective Tissue Development and Function    | 2.38E-03 - 4.93E-02 | 8           |
| Embryonic Development                         | 2.52E-03 - 2.00E-02 | 4           |
| Nervous System Development and Function       | 2.52E-03 - 4.93E-02 | 2           |

## Top Canonical Pathways

| Name                                                  | p-value  | Ratio         |
|-------------------------------------------------------|----------|---------------|
| Mismatch Repair in Eukaryotes                         | 7.25E-04 | 2/20 (0.1)    |
| Role of CHK Proteins in Cell Cycle Checkpoint Control | 3.11E-03 | 2/35 (0.057)  |
| Role of BRCA1 in DNA Damage Response                  | 8.73E-03 | 2/58 (0.034)  |
| Valine, Leucine and Isoleucine Biosynthesis           | 2.98E-02 | 1/12 (0.083)  |
| Hereditary Breast Cancer Signaling                    | 3.44E-02 | 2/122 (0.016) |

## Top Molecules

### Fold Change up-regulated

| Molecules | Exp. Value | Exp. Chart |
|-----------|------------|------------|
| ECT2      | ↑1.870     |            |
| TPX2      | ↑1.680     |            |
| PMEPA1    | ↑1.610     |            |
| UBE2C     | ↑1.570     |            |
| CENPF     | ↑1.500     |            |
| FAM91A1   | ↑1.380     |            |
| ATAD2     | ↑1.370     |            |
| NOTCH1    | ↑1.270     |            |
| ATP1B3    | ↑1.240     |            |
| AURKA     | ↑1.240     |            |

### Fold Change down-regulated

| Molecules | Exp. Value | Exp. Chart |
|-----------|------------|------------|
| S100P     | ↓-1.800    |            |
| PLAC8     | ↓-1.710    |            |

FAM107A

+-1.180

CBR1

+-1.170

CYB5A

+-1.070

### Top My Lists

| Name | p-value | Ratio |
|------|---------|-------|
|------|---------|-------|

### Top My Pathways

| Name | p-value | Ratio |
|------|---------|-------|
|------|---------|-------|

### Top Tox Lists

| Name                                                              | p-value  | Ratio         |
|-------------------------------------------------------------------|----------|---------------|
| <a href="#">Cell Cycle: G2/M DNA Damage Checkpoint Regulation</a> | 8.23E-02 | 1/34 (0.029)  |
| <a href="#">Hypoxia-Inducible Factor Signaling</a>                | 1.62E-01 | 1/70 (0.014)  |
| <a href="#">NRF2-mediated Oxidative Stress Response</a>           | 3.8E-01  | 1/188 (0.005) |

## Top Tox Functions

### Assays: Clinical Chemistry and Hematology

| Name                                                     | p-value             | # Molecules |
|----------------------------------------------------------|---------------------|-------------|
| <a href="#">Increased Levels of Alkaline Phosphatase</a> | 9.61E-02 - 9.61E-02 | 1           |

### Cardiotoxicity

| Name                                     | p-value             | # Molecules |
|------------------------------------------|---------------------|-------------|
| <a href="#">Cardiac Damage</a>           | 3.23E-02 - 3.23E-02 | 1           |
| <a href="#">Congenital Heart Anomaly</a> | 5.40E-02 - 5.40E-02 | 1           |
| <a href="#">Cardiac Arteriopathy</a>     | 1.00E00 - 1.00E00   | 2           |

### Hepatotoxicity

| Name                                     | p-value             | # Molecules |
|------------------------------------------|---------------------|-------------|
| <a href="#">Liver Cirrhosis</a>          | 4.96E-02 - 1.75E-01 | 2           |
| <a href="#">Hepatocellular Carcinoma</a> | 1.01E-01 - 1.01E-01 | 2           |

### Nephrotoxicity

| Name                                 | p-value             | # Molecules |
|--------------------------------------|---------------------|-------------|
| <a href="#">Renal Transformation</a> | 1.00E-02 - 1.00E-02 | 1           |
