# Supplementary material for: Integration of DNA Copy Number Alterations and Transcriptional Expression Analysis in Human Gastric Cancer
Source: PLOS journal article supplement (doi:10.1371/journal.pone.0029824), 2012-04-23
Supplement: S1 (10.1371/journal.pone.0029824.s001) [file journal.pone.0029824.s001]

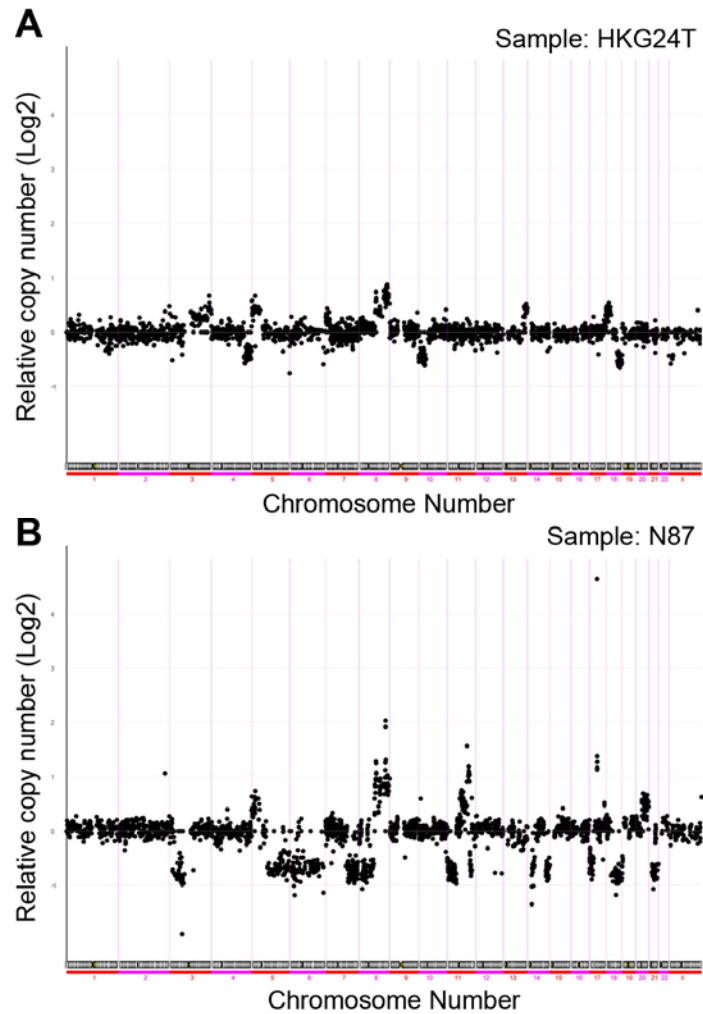

Figure S1. Two representative genome-wide ratio plots for individual gastric tumor. Log<sub>2</sub> ratio for each of the genomic clones was plotted according to chromosome position. **(A)** Whole genome DNA copy number profile of gastric cancer tissue sample HKG24T. Note that this sample showed the following DNA copy number variations: +3q, +5p, +8q, +13q, +17p, -4q, -10p and -18q. **(B)** Whole genome DNA copy number profile of gastric cancer cell line N87. Note that this sample showed the following DNA copy number variations: +5p, +8q, +11q, +20q, -3p, -5q, -6p, -6q, -7q, -8p, -11p, -14q, -17p and -21q. In addition, it also has amplification at 8q21, 8q24, 11q22 and 17q21.
