# Supplementary material for: Integration of DNA Copy Number Alterations and Transcriptional Expression Analysis in Human Gastric Cancer
Source: PLoS One. 2012 Apr 23;7(4):e29824. doi: 10.1371/journal.pone.0029824 (PMC3335165; doi:10.1371/journal.pone.0029824)
Supplement: Table S8 — The raw data of gene expression array. (XLS) [file pone.0029824.s020.xls]

## Sheet: Sheet1
Table S8. The raw data of gene expression array.
GID	CLID	NAME	GWEIGHT	GC (HKG18T)	GC (HKG38T)	GC (HKG38L)	GC (HKG61T)	GC (HKG12T)	GC (HKG16T)	GC (HKG4T)	GC (HKG68T)	GC (HKG66T)	GC (HKG77T)	GC (HKG92T)	GC (HKG9T)	GC (HKG75T)	GC (HKG42T)	GC (HKG42L)	GC (HKG73T)	GC (HKG3T)	GC (HKG76T)	GC (HKG90T)	GC (HKG28T)	GC (HKG37T)	GC (HKG58T)	GC (HKG81T)	GC (HKG79T)	GC (HKG83T)	GC (HKG82T)	GC (HKG72T)	GC (HKG59T)	GC (HKG24L)	GC (HKG24T)	GC (HKG40T)	GC (HKG14T)	GC (HKG48T)	GC (HKG41T)	GC (HKG13T)	GC (HKG23T)	GC (HKG69T)	GC (HKG80T)	GC (HKG32T)	GC (HKG2T)	GC (HKG36T)	GC (HKG39T)	GC (HKG34T)	GC (HKG34L)	GC (HKG53L)	GC (HKG49L)
AID				ARRY10X	ARRY42X	ARRY41X	ARRY83X	ARRY4X	ARRY8X	ARRY62X	ARRY92X	ARRY90X	ARRY104X	ARRY120X	ARRY125X	ARRY102X	ARRY51X	ARRY50X	ARRY100X	ARRY46X	ARRY103X	ARRY118X	ARRY24X	ARRY40X	ARRY76X	ARRY109X	ARRY106X	ARRY111X	ARRY110X	ARRY99X	ARRY78X	ARRY17X	ARRY19X	ARRY47X	ARRY6X	ARRY59X	ARRY49X	ARRY5X	ARRY16X	ARRY94X	ARRY108X	ARRY32X	ARRY28X	ARRY39X	ARRY44X	ARRY36X	ARRY34X	ARRY65X	ARRY60X
GENE1661X	IMAGE:283741	109544 Homo sapiens cDNA FLJ20167 fis, clone COL09512 Hs.10248 N52971	1	-0.21	-0.55	0.05			-0.49	0.24	-0.4	0.48	-0.22	-0.39	0.22	0.03	1.87	1.8		-0.17	-0.38	0.75	0.13	0.42	-0.07	0.4	0.03	-0.3	0.03	-0.13	0.03	-0.13	-0.45	0.12	-0.29	-0.13	0.35	-0.17	-0.04	-0.09	0.34	2.58	0.06	-0.57	-0.27	-0.12	0.07	0.15	0.22
GENE3757X	IMAGE:745524	220315 AA626242	1	-0.43	-0.25	0.2	0.15	-0.97	-0.96	-1.35	-1.41		0.92	0.43	0.59	0.79	0.7	0.41	-1.01	-1.36	0.6		2.01	1.18	0.43	0.46	0.73	-1.11	-0.4	0.57	0.12	0.01	-0.16	-0.66	-0.8	1.4	1.53	-0.13	0.46	1.06	-0.31	0.73	-0.41	0.02	-0.13	-0.48	0.08	0.26	0.26
GENE3505X	IMAGE:810303	120203 ESTs Hs.186669 AA463960	1	-0.23	-0.56	-0.08	-0.25	-0.15	-0.15	-0.21			0.37		-0.08	0.21	0.09	-0.05	-1.93	0.06		-0.13	0.31	0.07	-0.22	0.31	0.27	0.19	0.19	0.18	-0.31	0.14	0.07	0.16	0.06	-0.14	-0.29	0.33	-0.45	0.03	0.38	-0.04	-0.23	0.37	0.18	-0.84	-0.53
GENE354X	IMAGE:770858	102058 CD34 CD34 antigen Hs.85289 AA434387	1	-0.94	-0.13		-0.25	-1.09	-0.61	-1.39	-0.51	-0.39	0.37	-0.68	-0.82	-0.46	0.28	1.33	-0.89	-0.15	0.42	-0.04	0.52	0.11	-0.94		-0.76	-1.22	-0.52	-0.61	-0.96		-0.32	0.65	0.05	-0.71	-0.48	0.72	-0.62	-0.21	-0.89	-0.29	0.26	0.41	0.12	-0.07	0.11	0.29	1.23
GENE4233X	IMAGE:213604	223063 LOC56966 hypothetical protein from EUROIMAGE 1034327 Hs.8694 H72093	1	-0.56	-0.93	-1.31	-0.52	-0.9	-0.23	0.84		-0.49	1.32	1.05	1.37	0.11	0.3	0.57	-2.38	0.21	1.09		0.24	0.62	0.12	-0.9	-0.76	-1.59	-0.05	-1.79	-0.76	0.2	-0.01	0.66	0.43	0.44	0.49	1.03	-0.45	-0.91	-0.15	-1.53	0.64	0.51	-0.93		0.31	0.65	-0.09
GENE2297X	IMAGE:509516	113230 LOC56966 hypothetical protein from EUROIMAGE 1034327 Hs.8694 AA047339	1	-0.66	-0.98	-1.2	-0.42	-0.74	0.01	1.02	-1.82	-0.1	1.12	1.86	1.44		0.02	0.56	-1.98	0.29	1.29	0.09	0.19	0.54	-0.12	-1.06		-1	-0.34	-2.13	-0.74	0.11	0.36	0.58	-0.03	0.24	0.49	1.12	-0.47	-0.72	-0.32	-1.24	0.29	0.26	-1.23	0.17	-0.15	0.39	0.16
GENE3607X	IMAGE:50484	120855 CCRK cell cycle related kinase Hs.26322 H17616	1	-0.22	0.19	0	0.06	-0.53	0.4	0.45	-1.18	0.02	-0.4	0.23	-0.3	0.56	0.17	0.36	-1.74	-0.73	0.9	1.03	-0.07	0.32	0.66	-0.83	-0.96	-0.02	0.33	0.18	0.32	0.69	0.7	-0.39	-0.15	0.3	1.16			-0.66	-0.22	-1.38	0	-0.32	0.05	-0.3	-0.23	0.63	0.15
GENE5920X	IMAGE:1914134	314235 ESTs Hs.41352 AI310461	1	0.11	-0.18	0.63	-0.03	1.04	-0.54	-0.48		-0.66	-0.4	0.27	-0.27	-0.39	0.04	-0.48	-1.4		1.21	0.38	-0.51	0.95	-0.11	-0.68	-0.48	-0.32	0.83	-0.83	0.05	1.41	1.47	0.17	0.33	0.35	1.59	-0.26	-0.22	-0.09	-0.61	-0.39	-0.18	-1.69	-0.32	-0.46	-0.62	-0.06	0.31
GENE1311X	IMAGE:69279	107652 TAC3 tachykinin 3 (neuromedin K, neurokinin beta) Hs.9730 T54351	1	-0.19		0.12		0.25	-0.3	-0.35	-0.53	-0.4			-0.05	-0.26	0.13	-0.26		0.21			0.11	-0.27	-0.86	-0.41	-0.3	-0.22	-0.28	-0.46	0.07	1.19	1.38	-0.06	-0.08	0.81	0.16	-0.1	-0.08	-0.23	-0.42	-0.23	-0.3	0.27	-0.2	-0.36
GENE4617X	IMAGE:51920	225391 OSBPL1A oxysterol binding protein-like 1A Hs.252716 H22927	1	0.11	0.37	0.35	0.19	-0.9	-0.94	-1.27	-1.42	0.32	0.35	-1.02	-0.67	-0.54	0.57	1.58	1.36	0.48	-0.02	-0.48	0.97	-0.17	0.77	-1.19	-0.53	-0.21	-0.47	0.11	0.14	0.58	0.81	-1.28	-1.67	-0.53	-0.74	0.36	1.18	0.2	0.62	0.01	-0.19	-0.5	0.03	1.52	0.26	1.59	-1.37
GENE6340X	IMAGE:195397	320036 IMPACT hypothetical protein IMPACT Hs.284245 R88918	1	-0.15	0.47	-0.11	-0.09	-1.31	0.72		-1.61	1.44	0.27	-0.64	-0.06	-1.63	0.31	1.12	1.08	0.14	1.22	0.03	-0.51	-0.11	-0.51		-0.62	0.02	0.71	-0.02	0.11	1.1	0.75	-0.74	-1.5	-0.59	0.18	0.11	0.69	-0.37	1.16	0.46	-0.57	-0.32	-0.87	0.57	0.11		0.29
GENE520X	IMAGE:430264	102915 ESTs Hs.18441 AA010556	1	-0.07				-1.02	-0.22		-1.77	-0.6	-0.71		0.65	-0.5	-0.58	0.8	0.48	0.1	0.17	-0.17	0.84	-0.47	-0.66	0.2		0.14	0	0.07	0.22	0.48	0.35	0.13	-0.56	0.5			0.77	-0.24	-0.23	-0.46	0.04	0.62	-0.6	0.11		0.79	-0.74
GENE218X	IMAGE:731376	101306 ESTs Hs.174104 AA416740	1	-0.21	-0.35	0.37	0.54	-0.83	-0.55	0.31	-1.82	-0.16	0.64	0.25	0.6	-0.26	0.1	0.55	-0.17	0.02	0.14	0.84	-0.6	-0.28	-0.22		-0.17		-0.39	-0.84	-0.22	0.23	0.29	0				-0.08	-0.04	-0.01	-0.3	-0.14	-0.28	0.05	-1.59	0.7	0.71		0.59
GENE3785X	IMAGE:399463	220479 ESTs Hs.5415 AA732944	1	-0.49	-0.06	0.57	0.51	-0.93	-0.38	0.83	-2.32	-0.24	0.84	-1.37	0.59	-0.07	-0.12	1.01		0.12	0.3	-1.03	-0.84	0.11	-0.13				-0.71	-1.02		0.75	0.59	0.05	-0.52	-0.5		-0.02	-0.04	0.59		-0.32	-0.35	0.17	-1.71	0.73	1.01		0.18
GENE2686X	IMAGE:271989	115460 **ESTs, Weakly similar to KIAA0351 [H.sapiens] Hs.220745 N31935	1	-0.01	-0.04	0.19	-0.19	-0.96	-0.45	-0.08	-2.41	-0.28	0.18		-0.41	0.52	-0.15	0.75	0.02		0.27	0.5	0.12	0.27	0.48	0.22	-0.47	0.18	-0.18	-0.04	0.51	0.84	0.48	0.82	0.39	0.18	-2.57	-0.2		0.24	-0.04	-0.62	0.22	0.33	-0.61	1.2	0.97	-1.04	0.59
GENE1280X	IMAGE:488769	107472 Homo sapiens cDNA FLJ12807 fis, clone NT2RP2002316 Hs.188361 AA045847	1	0.37	0.23	0.18			-0.37	0.54	-0.18	0.4	0.08		1.08	0.34	0.54	0.08		0.72	-0.34	0.35	-0.33	-0.28	-0.38	0.13	0.33	0.17	-0.33	-0.11	-0.26	1.02	-0.06	-0.42	0	0.23	0.33	-0.16	-0.03	0.22	0.56	-0.58	0.8	0.22	0.67	0.06	0.26		-0.71
GENE5780X	IMAGE:269050	312522 Homo sapiens, clone MGC:16101 IMAGE:3621376, mRNA, complete cds Hs.285410 N26114	1	0.4	-0.4	-0.16		0.16	0.11	-0.14			0.27		0.49	0.99	0.68	-0.7		0.7	-2.03		-0.26	0.5	1.17	0.95	0.21	0.6	0.95	1.03	-0.83	0.51	0.74	-0.31	0.23	1.33	-0.51	-0.42	-0.52	0.99	1.34	-0.03	-0.4	-1.43	0.9	0.28	-0.07	-1.25	-0.09
GENE854X	IMAGE:122702	104945 ESTs Hs.18514 T98928	1	0.63	2.13			-0.07	0.61	0.55					0.21	0.42	0.5	-0.82		-0.7	-2.09		0.44	-0.26	0.38	0.31	0.13	0.07	-0.09	0.24	-0.01	0.16	0.11	1.42	-0.47	0.3	-0.23	1.51	2.18	0.4	0.85	0.8	0.55	-0.34	-0.45	-0.95	-0.54		-0.95
GENE537X	IMAGE:31251	103020 GPM6B glycoprotein M6B Hs.5422 R21466	1	-0.14	0.1	-0.24	-0.66	-0.74	0.19	-0.44	-0.57	-0.74	-0.91	-0.31	0.39	0.25	0.18	-1.21	-0.44	-0.52	-0.24	-0.44	-0.88	-0.68	-0.2	0.58	0.93	0.6	-1.43	0.39	0.61	0.29	0.08	-0.61	-0.16	-0.62	0	0.14	0.08	0.83	0.45	1.02		-0.37	-0.97	-0.33	-0.3	1.43	-0.6
GENE4759X	IMAGE:490647	226061 PCOLCE2 procollagen C-endopeptidase enhancer 2 Hs.8944 AA115742	1	0.37	-0.17	-0.51	-1.31	-1.67	2.64	0.12	0.45	0.33	0.1	0.73	0.46	1.03	-0.14	-0.02		-0.1	-0.76	-0.45	-1.1	-3.21	1.18		-0.22		-0.22	-0.19	0.39	0.08	0.22	-2.04	-0.31	-0.27	-1.48	-0.7	0.68	0.36	-0.24	0.31	0.26	0.08	-0.49	-1.12	-0.45	2.27	-0.82
GENE1945X	IMAGE:284355	111215 ESTs, Weakly similar to S43604 R07E5.1 protein (clone R07E5) - Caenorhabditis elegans [C.elegans] Hs.93828 N52136	1	-0.66	-0.97	-0.8	-1.12	0.23	0.96	0.6	0.75		-0.9	0.78	2	0.94	1.01	2.03	-4.9	0.24	1.38	0.65	-1.15	-1.07	0.83	0.36	0.7	0.53	1.53	-0.99	0.15	1.55	1.75	0.6	0.31	-0.71	-1.18	-1.72	-0.67	0.06	0.99	0.56	0.85	-1.32	-1.36	0.09	0.85	-0.66	-1
GENE8X	IMAGE:320424	100050 **ESTs Hs.55305 W04687	1					-1.16	0.77	0.5	0.82			1.4	0.08	0.74	1.44	1.03		-0.34		0.55	-0.23	0.31	-0.43	-0.09	0.31	-0.1	-0.34	-0.32	0.23	0.33	0.46	0.55		-0.01	-1.25	-1.27	0.8	0.64	0.37	-0.12		-1.51	-0.51	-0.18	0.24	0.3	-0.88
GENE1384X	IMAGE:42793	108030 FLJ10851 hypothetical protein FLJ10851 Hs.17860 R59722	1	0.25	0.43	0.01	-0.91	-2.47	0.16	0.49	0.13	0.71	1.36	0.97	1.72	1.47	-0.59	-0.19	-0.09	0.29	-0.88	1.78	1.68	0.31	1.38		-0.3	-0.18	-0.37	-0.09	-0.06	0.52	-0.49	0.28	0.23	-0.09	-0.28	-0.21		-0.75	0.01	0.41	-0.37	1.17	0.47	0.72	0.01	0.02	-0.43
GENE5663X	IMAGE:2017535	311064 LRP4 low density lipoprotein receptor-related protein 4 Hs.4930 AI369722	1	0.19		-0.57	-0.1	-0.64	-0.7	1		1.4	0.48	0.91	2.26	-0.18	-0.33	-0.53	-2.38	-0.02	-0.51	0.19	0.04	-0.74	0.85	-0.61	-0.07	0.43	0.87	0.71	0.91	0.29	0.45	-1.46	-1.27	0.95	-1.18	-0.71		-0.5	-0.21	-0.47	-0.35	0.71	0.65	0.02	0.58	0.61	-0.47
GENE24X	IMAGE:241003	100132 Homo sapiens mRNA; cDNA DKFZp586H021 (from clone DKFZp586H021) Hs.173515 H81009	1	-0.09	0	0.06	0.11	-0.25	-0.42	0.31	-0.32		1.41	0.46	1.59	0.15	0.17	0.87	-1.3	0.12	0.07	-0.23	-0.23	0.87	-0.32	0.44	0.42	-0.16	0.32	0.46	-0.01	-0.15	-0.38	-0.75	-0.19	0.52	0.55	-0.44	-0.03	-0.33	0.06	-0.69	0.1	0.88	-0.1	0.18	0.73	0.36	0.19
GENE1195X	IMAGE:293859	107031 N33 **Putative prostate cancer tumor suppressor Hs.71119 N66008	1	-0.21	-0.88	-0.71		-0.48	0.35	1.17	0.78	-0.14	3.78	0.62	2.38	0.24	0.84	-0.35	-0.64	-0.07	0.58	1.1	0.96	0.27	-0.3	0.25	1.21	0.73	-0.18	-0.42	0.19	0.39	0.04	-0.81	-0.82	-1.15	-1.42	-0.72	1.33	-0.21	0.64		-0.43	-0.88	-0.3	-0.88	-1.03	-1.55	-1.88
GENE3853X	1276614	220905 MSTP9 macrophage stimulating, pseudogene 9 Hs.278657 AA707273	1	0.19	-0.59	1.05	-1.68	-0.13	1.08	1.33	0.22	-0.09	0.13	3.54	0.61		0.13		-2.04	0.12	-0.08	2.42	2.23	-0.23	-0.95	-0.67	0.33	-0.05	-0.6	-0.06	-0.29	0.19	0.32	-0.57	-0.27	-0.21	0.42	-0.18	-1.45	-1.21	-0.03	0.63	-0.99	-0.31	0.25	-1.25	-0.72	0.22	-0.94
GENE2832X	IMAGE:302972	116299 FLJ20010 hypothetical protein Hs.91816 N91114	1	0.12	-0.07	0.13	0.09	0.32	1.06	1.49	-0.08	1.01	-0.58	0.92	1.26	-0.2	-0.02	-0.02	-0.21	0.09		0.11	0.47	-0.25	-1.44				-0.66			-0.1	-0.3	0.18	0.46	-0.61	-0.36	-0.45			-0.12	0.5	0.16	0.19	0.32	-0.35	-0.27		0.22
GENE4036X	IMAGE:34134	222045 FLJ20010 hypothetical protein Hs.91816 R19933	1	0.1	0.22	-0.03	0.16	0.03	0.92	1.6	0.05	1.62		0.96	1.39	-0.01	0.47		0.42	0.41		0.61		-0.33	-1.21	-0.42	-0.45	-0.77	-0.78	-0.92	-0.08	-0.41	0.15	0.41	0.42	-0.84	-0.46	-0.34	-0.19	-0.9	-0.22	0.54	0.17	-0.33	0.48	-0.36	-0.27	-0.04	0.2
GENE53X	IMAGE:365883	100256 C21orf33 chromosome 21 open reading frame 33 Hs.182423 AA025421	1	0.45	-0.25	-0.06	-0.96	-0.68	0.2	0.18	0.78	0.86	0.39	1.54	0.39	0.82	0.02	-0.37	0.12	0.4	0.18	0.66	0.1	-0.88	-0.65	-0.24	-0.13	-0.32	0.13	-0.08	-0.08	0.49	0.6	-0.06	-0.42	0	-0.27	-0.66	-0.32	-0.67	0.03	0.21	-0.26	-1.08	-0.28	-1.55	-0.72	0.02	-0.02
GENE3428X	IMAGE:505881	119793 ADA adenosine deaminase Hs.1217 AA683578	1	0.13	-0.3	-0.66	-1.13	-0.76	0	0.71	0.88	-0.12	0.9	1.44	0.93	0.08	0.35	-0.6	0.28	0.34	-0.15	0.42	-0.94	-1.05	-1.11	0.29	0.12	0.18	0.2	0.03	0.16	-0.78	-0.51	-0.71	-1.02	0.19	-1.25	-0.8	-0.22	-0.56	0.04	-0.52	-0.44	-0.67	-1.53	-1.36	-0.43	2.12	-1.37
GENE91X	IMAGE:769857	100489 CBS cystathionine-beta-synthase Hs.84152 AA430367	1	0.25	-0.64	-1.41	-1.27	-0.96	1.35	0.11	0.81	2.94	0.96	1.89	0.83	1.07	0.85	-1.83	-1.75	-0.17	-2.06	-0.3	0.76	0.06	-1.3	0.17	0.9	-0.01	0.43	0.13	1.08	0.2	1.18	-1.15	-1.05	-0.65	-1.48	-0.81	-0.19	0	0.24	-1.28	-0.81	-0.77	-0.43	-0.94	-0.17	1.42	-0.23
GENE3499X	IMAGE:35788	120170 ESTs Hs.221797 R45976	1	0.13	-0.16	-0.49	-0.25	-0.16	-0.19	1.02		2.05	0.02	0.46	1.53	0.51	0.4	0.04	-0.13	0.64	-0.85	0.39	0.18	0.01	-0.4	0.26	-0.13	0.09	0.1	0.14	-0.1	-0.41	-0.52	-0.27	-0.63	-0.74	-0.5	-1.53		-0.13	-0.12	-0.11	-0.35	0.42	-0.13	0.51	0.01	-0.56	-0.93
GENE438X	IMAGE:212188	102535 APOH apolipoprotein H (beta-2-glycoprotein I) Hs.1252 H68848	1	0.88	-0.55	0.19	-1.07	-1.57	1.08	-1.07	-0.61	3.15		3.43	3.52	0.42	0.66	-0.06	1.67	-1.04	-1.65	0.06	-0.08	-0.28	0.89		1.4	-0.18	-0.82	0.17	1.54	0.2	-0.18	-0.94	-0.67	-0.94	1.02	-0.82	-1.32	-0.57	0.09	-0.11	-0.91	-0.44	-0.5	-0.06	-0.18	-0.16	1.46
GENE989X	IMAGE:23345	105731 KIAA1020 likely ortholog of mouse hypermethylated in cancer 2 (Hic2) Hs.109445 R39191	1	-0.4	0.08	0.38		0.1	-0.94	0.3	-0.66	1.83	0.31	1.12	0.43	-0.59	-0.15	-0.2	0.67	-0.14	-0.03	0.69	0.74	0.22	-0.24		-0.25	-0.57	0.18	-0.29	0.13	0.01	-0.12	0.07	-0.16	-0.34	0.03	-1.15		0.79		-0.03	0.2	-0.93	-0.08	-0.54	-0.1	0.34	0.3
GENE1629X	IMAGE:824479	109356 LOC81691 exonuclease NEF-sp Hs.177926 AA490338	1	-0.15	-0.13		0.24	0.58	-0.17	-0.12	0.87	0.32	-0.15		0.01	-0.26	-0.1	0.34	-0.39	0.02	-0.06	0.93	0.26	0.1	0.29	0.02	-0.13	-0.24	-0.39	0.4	0.08	0.21	0.25	-0.12	0.45	-0.25	0.03	-0.32	-0.47	-0.1	0.61	-0.61	-0.06	-0.4	0.3	-0.49	-0.43	-0.05	0.53
GENE3585X	IMAGE:50354	120721 OTX2 **orthodenticle homolog 2 (Drosophila) Hs.288655 H17803	1	0.11	0.29	0.53		0.75	-0.19	0.12		-0.22			0.43	-0.75	0.09	0.19		0.7		0.14	0.55	0.53	1.2		0.21	0	0.32	0.57	-0.77	0.16	0.88	-0.01	-0.3	0.16	-0.1	-0.57		0.32	0.23	-0.93	0.48	0.07	0.57	-0.6	-1.37	-0.03
GENE2660X	IMAGE:207794	115283 NFE2 nuclear factor (erythroid-derived 2), 45kD Hs.75643 H58953	1	-0.03	0.13	0.17	-0.94	-0.01	-0.59	0.35	-0.56	0.11	-1.12	3.32	0.68	0.44	2.64	1.65	-0.13	0.2	-0.36	-0.11	0	0.16	1.26	0.55	-0.29	0.17	0.15	-0.06	-0.23	0.17	-0.13	-0.67	0.58	-0.69	-0.8	-1.1		0.21	0.3	-0.16	0.28	-0.77	0.28	-0.72	-0.63	-0.58	-0.74
GENE2369X	IMAGE:246035	113639 BLVRB **biliverdin reductase B (flavin reductase (NADPH)) Hs.76289 N55540	1	-0.06	-0.51	0.01	-0.78	-0.49	0.07	0.15				2.82	0.4	0.13	0.25			-0.03		-0.01	0.05	-1	-0.04	0.62	-0.2	0.32	-0.41	-0.04	-0.8	0.24	0.35	-0.83	-0.39	-0.27	-1.81	-0.33	0.7	0.53	0.57	-0.75	0.55	-0.98	-0.45		-0.95		-1.18
GENE1900X	IMAGE:823590	110969 STHM sialyltransferase Hs.288215 AA497051	1	0.24	-0.54	-0.47	-1.43	-0.09	0.69	0.21	-0.08	-0.12	-0.79	1.35	-0.32	-0.08	-0.38	-0.99	-1.51	-0.04	0.7	0.16	-0.02	0.85	0.08	0.4	0.2	0.18	-0.04	-0.11	-0.07	0.81	0.73	-0.33	0.85	-0.31	1.09	0.12	-0.48	0.72	1.23	0.1	-0.05	-1.03	0.11	-0.69	-0.52	-0.74	-1.13
GENE170X	IMAGE:488651	101001 MGC16491 hypothetical protein MGC16491 Hs.59771 AA045825	1	0.49	0.92		0.19	0.15	0.12	0.11	-0.9		-0.62	1.19	0.66	0.44	-0.36	-0.68	-0.88	-0.01	-1.65		0.18	0.52	1.04	0.2	0.36	-0.2	-0.71	0.74	-0.24	0.28	0.2	1.38	0.4	-0.64	-0.41	-0.43		0.42	0.42	-0.71	0.09	0.28	-0.17	-0.98	-1.11	-0.54	-0.92
GENE2446X	IMAGE:219961	114093 FZD3 frizzled homolog 3 (Drosophila) Hs.40735 H84795	1	-0.02		0.47	0.27	0.34	-0.38	-0.19	0.45	-0.19	-0.2	-0.57	0.1	0.51	0.59	0.37	0.43	0.39	-1.37		0.45	0.1	0.2	0.43	0.15	0.09	-0.09	0.18	0.09	-0.03	0.01	0.16	0.22	0	0.58	-0.32			0.45	0.49	0.01	-1.01	0.31	0.52	0.45		0.49
GENE483X	IMAGE:855808	102732 ESTs Hs.116932 AA664060	1	0.29	-0.32	1.06		-0.71	-0.24	0.04	-1	-0.38	-1.44		-0.46	-0.65	-0.17	0.39		-0.25		0.27	-0.47	0.37	-0.7	-0.49	0.05		0.2	-0.59	-0.47	0.39	1.01	-0.09	-0.47	-0.91	-0.98	0.11	0.26	0.01	0.09	0.38	0.38	-1.53	-0.9	-0.13	-0.27
GENE6475X	IMAGE:159587	98775 ESTs Hs.138384 AI668589	1	0	0.12	0.56	1.34	-0.43	-0.28	-0.17		-0.6	-0.46		0.44	0.13	-0.25	-0.3		0.21	-1.47		-0.65	-0.13	0.14	-0.5	0.21	0.07	-0.44	0.31	0.46	0.07	0.06	-0.42	0.13	0.45	-0.23	0.16	1.13	0.49	0.36	0.22	-0.4	-1.24	-0.13	-0.46	-0.33	0.65	0.2
GENE2926X	IMAGE:264162	116760 HSPC157 HSPC157 protein Hs.279842 N20480	1	0.14	-0.26	0.15	0.05	0.59	0.46	0.44	-0.58	1.19	-1.35	1.18	0.09	-0.06	-0.59	-0.28	-1.41	0.05	-1.14	-1.26	1.06	0.46	-0.2	0.4	0.02	0.33	-0.55	0.22		0.54	0.49	0.37	0.48	-0.5	0.35	0.11	-0.48	-0.39	0.69	0.81	-0.31	-1.08	-0.1	-0.61	-0.35	0.67	0.59
GENE5012X	IMAGE:853789	306863 TYRP1 tyrosinase-related protein 1 Hs.75219 AA668457	1	0.93	0.53	0.2	-0.42	-0.31	-0.88	-0.02	1.3	-0.74			0.39	0.41	0.39	-1.05	-2.28	0.35		0.54	-0.99	0.33	0.06	0.39	0.04	0.48	0.16	0.39		0.41	-0.75	-1.67	-0.88	-0.33	-0.97	-0.22	-0.64	-0.13	0.26	0.28	0.21	0.33	0.02	0.06	-1.18	-0.65	-1.17
GENE5014X	IMAGE:1681719	306868 IL11 interleukin 11 Hs.1721 AI148233	1	0.2	0.87		-0.28	0.33	0.22	0.09	0.1	0.74	-0.7	0.72	0.27	-0.2	-0.24	-1.29	-0.69	-0.22		-0.94	-0.62	0.71	0.75	1.36	0.39	0.57	0.01	-0.18	0.84	0.4	0.02	-0.38	0.56	-0.46	-0.19	0.36	1.35	0.17	0.26	0	-0.74	-0.34	-0.06	-0.34	-0.63	-0.81	-1.46
GENE2716X	IMAGE:46916	115614 MMP16 matrix metalloproteinase 16 (membrane-inserted) Hs.90800 H09996	1	0.17		0.03	-0.1	-0.49	-0.12	-1.14	-1.06				0.46	0.17	0.24	-0.05		0.52	-1.49	0.6	-0.04	0.52	0.15	0.61	0.53	0.46	-0.11	0.23	0.47	0	0.05	-0.28	0.17	-0.25	-2.14	-0.09	-1.37	0.12	0.64	0.87	-0.34	-0.02	-0.09	0.46	0.47	0.02	0.22
GENE3104X	IMAGE:301075	117779 LOC92235 hypothetical cardiac/skeletal muscle-expressed ORF Hs.50820 AI822070	1	1.88	4.29	0.98	-1.96	-1.21	-0.44	-0.79	-6.38					1.03	0.33	-1.06		0.56		-0.66	-0.44	1.25	2.11	1	0.8	1.23	0.68	0.1	1.51	1.28	1.23	1.66	0.02	2.84	-1.4	2.44	0.29	0.96	1.17	0.69	-1.41	-2.2	-0.4	-0.5	-1.67	-2.17	-0.14
GENE5543X	IMAGE:1563050	310202 SSX1 synovial sarcoma, X breakpoint 1 Hs.194759 AA954482	1	-0.14				0.25	1.83	-0.04		-1.02		0.35	1.31	2.86	2.44	-0.51	-1.68	0.06			0.61	0.13	0.32	0.89	-0.14	0.02	0.25	0.09		0.27	0.33	-0.01	-0.35	0.24	-0.71	2.42	-0.46	-0.13	-0.05	0.07	0.02	-0.97	0.5	-0.34	-0.4	-0.03	0.42
GENE2643X	IMAGE:565733	115191 Homo sapiens cDNA FLJ30088 fis, clone BNGH41000010 Hs.351271 AA135813	1	-0.39		0.32		0.37	2.03	0.66	-1.58	-0.76			0.81	0.34	1.05	-0.21	-1.05		-1.08	1.04	0.5	-0.03	0.44	0.54	0.38	0.24	0.88		0.57	-0.31	0.53	1.25	0.78	0.15	0.11	-0.23	-0.9	0.69	0.15	1.08	-0.44	-0.51	-0.1	0.05	0.55	-0.32	-0.1
GENE3682X	IMAGE:340702	178466 PEG10 paternally expressed 10 Hs.137476 W56356	1	-0.58		-0.62	1.88	-0.74	-0.45	0.17	-2.76	1.43		0.34	3.12	-0.37	0.6		-2.72	-0.59	-0.27	-0.8	0.46	4.19	0.23	0.35	0.47	0.73	0.93	-0.4	0.13	-1.62	-0.98	-1.36	-0.73	-0.55	-0.96	-1.17	-0.29	2.5	-0.68	0.97	1.11	-1.63	-0.49	1.51	0.33		3.42
GENE3110X	IMAGE:897678	117809 PEG10 **paternally expressed 10 Hs.137476 AA598754	1	-0.64	-0.3	-0.62	-1.02	-0.56	-0.23	-0.73	-0.37	2.37	-1.66	1.68	2.7	-0.17	-0.92	-0.72	-2.58	-0.27	0.53	0.11	0.48	4.12	0.29	1.52	-0.13	1.12	-0.05	-0.16	0.66	-0.7	-0.48	-2.24	-1	-0.82	-1.1	-1.05	-0.71	2.92	-0.63	-0.45	1.18	-2.07	-0.52	0.99	0.42	1.74	-0.14
GENE4977X	IMAGE:243174	237289 SERPINF2 serine (or cysteine) proteinase inhibitor, clade F (alpha-2 antiplasmin, pigment epithelium derived factor), member 2 Hs.159509 H94475	1	-0.14	-0.02	0.28	-0.14	-1.07	1.06	-0.26		-0.81	-0.33	2.16	1.59	0.87	-1	-1.08	-1.29	-0.61	-1.21	-0.37	-0.22	0.85	0.57	1.1	0.43	-0.51	-0.24	0.45	0.39	-0.02	-0.72	-0.31	-0.24	0.24	-0.89	-0.09		1.27	0.04	-0.61	-0.35	-0.93	-0.52	-0.17	0.11	2.76	-1.19
GENE2232X	IMAGE:810367	112892 DJ79P11.1 X-linked protein Hs.283719 AA464180	1	-0.56	-0.83	-0.57	0.7	-0.29	0.27	-0.05	1.53	-0.39	-2.59		2.92	1.25	-0.35	-1.13	-2.37	0.45	-0.85	-0.89	1.38	1.05	0.31	-0.22	0.96	0.21	-0.85	-0.32	0.27	0.12	0.12	-0.4	-0.43	-0.54	-0.38	-0.43	0.3	0.02	0.29	-0.48	0.1	-0.21	-0.8	-0.37	-0.3	-0.69	-0.82
GENE1083X	IMAGE:341706	106283 BEX1 brain expressed, X-linked 1 Hs.334370 W60581	1	0.87	-0.17	-0.19	1.43		-0.31	-0.57	0.66	-0.68	-2.17	-1.27		0.84	-0.52	0.96	-3.34	0.03	-1.26	-1.85		0.95	-0.07	0.36		0.7		0.79		0.11	0.09	-1.5	-0.69	-0.55	-1.16	-0.76	0.08	-0.06	0.45	-0.32	0.53	-0.15		-1.17	-0.79	-1.26
GENE632X	IMAGE:245242	103555 CPB2 carboxypeptidase B2 (plasma, carboxypeptidase U) Hs.75572 N54494	1	0.08	0.88	0.33		0.61	0.58	-0.21	-0.32	-0.17		-0.22	0.49	0.53	-0.1	0.01	-0.26	0.33	-1.81	0.27	0.1	0.12		0.1	0.08	0.08	0.54	0.9	0.01	0.11	0.21	-1.25	-0.24	-0.17	-0.56	-2.16	-0.47	0.18	0.06	0.21	-0.07	-0.21	0.16				-1.08
GENE1315X	IMAGE:897956	107683 PRAME preferentially expressed antigen in melanoma Hs.30743 AA598817	1	0.18	0.31	0.14	-1.28	0.95	2.21	-0.17	1.42	0.43	-0.3	1.74	0.58	0.73	-0.13	-0.23	-1.64	-0.02		1.17	0.63	0.83	0.55	0.26	-0.12	0.48	0.09	-0.01	0.36	0.65	0.2	-0.56	0.18	-0.03	-0.15	-1.24	-0.04	0.94	0.44	-0.12	0.56	-0.78	0.18	0.06	-0.06		-1.06
GENE2970X	IMAGE:1031552	116983 EPHB6 EphB6 Hs.3796 AA609284	1	-0.11	-0.28		-1.73	-0.43	0.19	-0.49	-1.5		-1.08	-0.67	2.24	0.4	0.59	-0.68	-1.35	0.57	-1.81	-0.44	0.12	-0.33	0.34	-0.17	0.58	0.44	0.46	0.49	0.23	0.13	0.12	-1.03	-1.13	-0.41	-1.43	-0.72	3.24	-0.09	0.3	-0.7	0.29	-0.69	-0.58	0.53	0.21	2.57	-1.14
GENE811X	IMAGE:126470	104667 PTPN1 protein tyrosine phosphatase, non-receptor type 1 Hs.155894 R06605	1	0.18		0.19	0.26	-0.39	-0.61	0.55	-1.29		0.23	-0.13	0.56	0.59	0.38	0.05	-0.41	0.47	-1.06	0.66	0.5	0.32	-1.45	0.52	0.71	0.39	0.12	0.26	0.52	0.22	0.04		-0.47	-0.33	-0.85	-0.79	0.23	0.34	0.65	0.08	0.1	-0.23	-0.04	-0.57	-0.01	0.43	0.05
GENE1731X	IMAGE:213280	109930 ESTs, Highly similar to 1312232A kininogen L,high MW [H.sapiens] Hs.289056 H69833	1	-0.03	0.28	0.1		0.18	-1.55	0.24	-0.38	-0.29	-2.05		0.45	0.57	-0.35	0.19	-1.68	0.53	-1.58	0.56	0.31	-0.21	-1.28	0.61	0.65	0.32	0.52	0.34	0.6	0.45	0.29	-1.28	-1.62	-0.25	-1.1	-1.32	0.89	0.26	0.41	0.25	0.4	-1.35	0.49	-0.85	-0.52	0.51
GENE3228X	IMAGE:345196	118564 FLJ21657 hypothetical protein FLJ21657 Hs.26498 W72333	1	0.18	0.42	0.36	-1.76	0.51	-0.86	1.13	0.11	0.46	-0.34	1.04	0.45	0.05	0.87		-2.94	0.11	-2.25		0.83	0.96	-1.86	-0.67	0	0.38	-0.08	0.19	0.54	2.08	2.29	-0.87	-0.02	-0.13	-0.1	-0.78	0.8	0.97	0.09			-0.68	0.38	-0.33	-1.24	-0.4	-0.53
GENE1491X	IMAGE:136188	108623 MSX1 **msh homeo box homolog 1 (Drosophila) Hs.1494 R33154	1	0.43	0.27	0.33	-0.97	0.28	-0.15	-0.07	-0.9	1.25	-0.06	1.52	0.06	0.57	1.43	0.4	-3.08	1.07	0.15	0.32	0.69	0.58	-0.11	0.12	0.48	0.46	0.67	0.37	0.25	0.07	0.02	-0.1	0.08	-0.23	0.11	-0.2	-0.45	0.47	0.28	0.68	-0.46	-1.32	0.21	-1.01	-0.48	0.37	-0.81
GENE1360X	IMAGE:85690	107880 SERPIND1 serine (or cysteine) proteinase inhibitor, clade D (heparin cofactor), member 1 Hs.1478 T62086	1	0.58	0.22	0.29	-1.81	0.47	-0.08	-0.19	-1.1		1.71	0.6	2.52	0.68	0.16	-0.68	-1.86	0.45		0.69	0.74	0.41	1.23	1.17	0.49	0.81	0.34	0.29	1.14	1.09	0.3	-1.14	-0.54	-0.56	-1.24	-0.78	0.73	0.18	0.64	-0.74	-0.12	-0.99	0.37	-0.54	-0.27	-0.97	-0.8
GENE1186X	IMAGE:141589	106945 LOC84528 homeobox protein from AL590526 Hs.28937 R69071	1	1.22	1.03	0.89	-0.29	-0.21	0.46	0.9	-1.01	-0.13	-1.7	0.85	-0.78	0.52	1.39	0.35	-0.79	0.63	-0.89	0.75	-0.48	0.31	-0.62	1.06	0.38	0.64	0.21	0.94	-0.3	-1.18	0.49	-0.74	0.32	-0.6	-0.92	-0.88	-0.33	0.37	0.75	-0.41	-0.43	-0.32	-1.24	-0.73	-0.32	-1.06	-0.64
GENE371X	IMAGE:782503	102188 FADS1 fatty acid desaturase 1 Hs.132898 AA431773	1	-0.38		-0.04	0.5	0.5	0.74	-0.1	-0.91	0.24	-0.3	1.78	1.48	1.17	0.17	-0.84	-1.21	0.35	-0.8	0.32	0.56	0.8	0.51	0.81	-0.23	0.62	0.19	0.29	-0.4	0.14	-0.25	-0.96	-0.5	0.08	-1.1	-0.35	0.25	-0.05	0	-0.32	0.54	-0.67	-0.05	0.21	0.24	0.98	-1.03
GENE2447X	IMAGE:782575	114095 HSJ001348 cDNA for differentially expressed CO16 gene Hs.69517 AA447522	1	0.14	0.05	0.2	1.5	0.24	0.03	0.89	-0.86	-0.76	-1.77		0.07	1.87	-0.62	0.16	-1.6	0.39	-1.15	-1.17	0.05	-0.51	-0.02	0.42	0.8	0.47	0.63	0.33	0.56	0.48	0.31	-0.8	0.05	0.03	-0.51	-0.24	0.67	0.9	0.31	-0.23	0.69	0.11	0.13	0.78	0.3	-0.28	-0.41
GENE5234X	IMAGE:1323233	308164 CYP24 cytochrome P450, subfamily XXIV (vitamin D 24-hydroxylase) Hs.89663 AA877213	1	-0.88	-1	0.03	-0.24	0.09	-0.36	0.56	0.91	1.09	-2.98	1.66	1.96	2.21	1.72	0.52	-0.85	0.14	-2.16	-0.66	-0.22	-0.09	0.23		2.61	1.6	1.02	0.89	1.42	0.32	0.49	-0.88	-0.36	-0.19	-0.55	-0.24	-0.68		1.83	0.86	-0.87	-0.48	0.55	-0.36	-0.38	5.56	-1.83
GENE5737X	IMAGE:1679942	312014 KIAA1053 KIAA1053 protein Hs.173571 AI146610	1	0	0.21	0.36	-0.46	0.03	-0.4	0.33	-0.79	-0.4	-0.74		0.15	0.34	-0.49	-0.35		-0.79	-0.8	-0.47	0.43	0.29	0.35	0.62	0.63	1.26	1.83	-0.04	0.76	0.28	0.33	0.18	0.55	0.04	0.67	0.22	0.01	-0.15	0.33	-0.3	0.19	0.22	1.23	0.22	0.9	0.58
GENE5710X	IMAGE:1865232	311681 DKFZP564C152 DKFZP564C152 protein Hs.184216 AI269361	1	-0.08	-0.01		-0.38	0.25	-0.35	0.38	-0.03	-0.57	0.96		0.43	0.3	-0.18	-0.21	-2.98	-0.1	0.47	-0.76	0.7	0.39	0.32	0.43	0.89	2.4	3.07	0.66	0.5	0.51	0.3	0.46	0.03	0.62	0.25	-0.16	0.1	-0.1	0.14	-0.24	-0.11	0.14	0.77	0.49	0.26	-0.06	0.13
GENE5979X	IMAGE:1751408	315135 GAGE8 G antigen 8 Hs.251406 AI187350	1	0.45	-0.25	0.73	-0.54	1.31	-0.64	0.72	-1.05	-0.28	-0.5	0.33	-0.25	-0.5	-1.83	-1.01	-2.08	-1.4	-1.3	-0.89	1.97	0.41	0.85	0.01	-0.39	4.21	5.38	0.1	1.42	-0.33	0.15	0.13	0.17	0.49	0.99	0.42	0.11	-1.01	-0.2	-0.79	1.04	-0.4	1.19	-0.48	0.12	-0.18	-0.26
GENE5898X	IMAGE:1456782	313986 Homo sapiens protein phosphatase 1, regulatory (inhibitor) subunit 3F (PPP1R3F), mRNA Hs.227583 AA863316	1	0.46		0.14	-0.35	0.36	-0.91	-0.26		-0.33	-1.31	0.76	0.66	-0.08	-0.57	-0.45	-1.18	-0.57		-0.67	1.49	0.76	-0.05	-0.64	0.18	3.11	4.43	0.23	0.9	0.24	0.07	-0.83	-0.67	-0.38	0.41	-0.44	-0.44	0.41	-0.08	-0.85	-0.13	-0.83	0.62	-0.81	-0.93	-0.17
GENE5530X	IMAGE:1584142	310131 GAGEB1 G antigen, family B, 1 (prostate associated) Hs.128231 AA972716	1	0.75	0.71	0.5	-1.07	0.76	-0.3	0.67	-2.37	-0.17	-1.45	1.85	0.58	0.21	0.57	-0.62	-2.58	-0.03	-1.4	-0.69	1.51	-0.41	0.04	1.48	0.22	4.06	4.78	0.29	1.72	0.51	-0.02	-0.82	-0.39	0.66	0.58	-0.67	0.12	-0.18	0.36	0.44	-1.03	-0.35	0.72	-0.79	-0.79	-0.57	0.13
GENE5624X	IMAGE:1550909	310782 AA913206	1	0.29	0.33	0.58	-1.24	1.88	-1.29	0.09	-0.94	0.6	-1.39	0.84	0.35	-0.98	-0.73	0.82	-1.03	-0.78	-2.06	-0.84	2.64	0.49	0.64	0.25	-0.34	5.24	6.27	0.26	1.85	0.09	1.51	-0.45	-1.41	0.58	1.49	0.86	0.06	-0.59	0.03	0.13	0.01	-1.56	1.6	-1.28	-1.25	-0.48	0.19
GENE6339X	IMAGE:2092597	320031 GAGE7B G antigen 7B Hs.251677 AI381509	1	-0.11	-2.42	-1.36	-0.75	1.62	0.21	2.18	-1.29	0.68	-1.67	0.75	0.57	0.51	1.28	0.85	-1.71	0.45	-2.16	-1.51	2.17	0.95	1.02	0.9	0.96	4.97	5.99	0.56	2.12	-1.03	1.62	0.15	-0.17	0.71	1.16	0.04	1.05	-0.43	-0.45	0.06	-0.41	-0.44	1.01	-1.79	-0.28	-1.36	0.25
GENE1229X	IMAGE:668685	107225 IGFBP1 insulin-like growth factor binding protein 1 Hs.102122 AA233079	1	0.07	-0.5	-0.37	-0.8	0.46	0.14	0.29	-0.2	-0.42	-0.86	0.77	0.92	0.22	0.18	-0.27	-1.37	0.32	-0.61	0.59	0.37	0.06	0.8	-0.16	0.17	0.59	0.18	0.62	0.48	0.94	1.39	-0.25	0.22	-0.82	-0.6	-0.23	0.71	0.18	0.48	-0.53	0.26	-0.44	-0.22	-0.47	-0.48	-0.58	-0.74
GENE2955X	IMAGE:1035889	116898 KRT4 keratin 4 Hs.3235 AA629189	1	0.19	-0.06	-0.21	-0.24	0.36	0.07	0.33	0.92	0.69	-0.73		0.3	0.42	0.38	-0.76	-0.62	0.39	-0.84	0.15	-0.29	-0.25	0.51	0.4	0.32	0.79	0.54	0.49	0.12	1.06	0.86	-1.17	-0.47	-0.85	-0.4	-0.54	0.76	0.3	0.63	-0.63	0.56	-0.54	0.02	-0.25	-0.43	-0.32	-0.47
GENE78X	IMAGE:823575	100413 FLJ10392 hypothetical protein FLJ10392 Hs.20887 AA497044	1	0.1	0.76	0.45	-0.93	0.68	-0.34	0.17	0.39	0.22		-0.57	0.59	0.37	0.64	0.08		0.57	-1.04	-0.89	0.51	0.32	0.25	0.12	0.24	0.61	0.19	0.39	0.69	0.03	0.31	-0.56	-0.09	-0.69	-1.32	0.15	0.5	0.54	0.08	-0.3	-0.12	-0.81	0.43	-0.13	-0.44	0.31	0.15
GENE5620X	IMAGE:2010012	310753 P37NB 37 kDa leucine-rich repeat (LRR) protein Hs.155545 AI341604	1	0.85	0.73	0.66	-0.38	0.68	-0.75	-0.45		-1.41			-0.02	-0.51	-1.45	0.18	-1.37	-0.77	-1.65		0.42	0.35	0.3	-0.27	-0.18	0.13	0.17	0.96	0.35	-0.37	-0.73	-1.18	-0.76	-1.19	-1.33	-0.3	0.37	0.32	0.44	0.18	-0.03	-0.2	0.34	-0.66	-1.09	-0.4	-0.5
GENE5373X	IMAGE:2014373	309133 HNK-1ST HNK-1 sulfotransferase Hs.155553 AI362035	1	0.63	0.43	0.52	-0.83	0.94	-0.83	-0.28		0.81	-0.87	0.66	0.09	0.84	-0.82	0.04	-1.37	-0.67	-0.21	-0.75	0.71	0.74	1.14	0.22	-0.13	-0.12	0.1	0.2	0.16	-0.26	-1.2	-1.14	-0.7	-0.91	-0.92	-0.54	-0.06	-0.15	0.23	-0.16	0.23	-0.16	0.58	-0.31	0.08	0.86	-1.08
GENE1775X	IMAGE:121727	110237 KIAA1560 KIAA1560 protein Hs.42586 T98162	1	0.12	0.62	0.62	-0.31	0.58	0.11	0.1	0.68	0.4	-0.18	1.6	0.44	0.35	0.49	0.71	-0.38	-0.21	-0.92	0.36	0.07	0.29	1.17	0.51	0.63	0.65	0.55	-0.1	0.18	0.25	0.15	-0.46	0	-0.49	-0.08	-0.75	0.27		0.49	-0.01	0.05	-0.07	-0.14	-0.55	-0.53	-0.12	-0.54
GENE2672X	IMAGE:293858	115361 SACS spastic ataxia of Charlevoix-Saguenay (sacsin) Hs.159492 N66003	1	0.31	1.09	0.62	-0.64	0.46	-0.44	-0.16	0.03	-0.04	0.59	0.79	0.66	0.19	-0.24	-0.17	-1.88	-0.01	-0.52	0.09	0.21	0.47	1.04	0.38	0.45	0.46	1.14	0.21	0.47	0.44	0.14	-0.62	-0.16	-0.3	0.54	-0.08	0.56		0.61	0.23	0.19	-0.57	-0.17	-0.44	0.11	1.15	-0.38
GENE814X	IMAGE:210548	104683 F2 **coagulation factor II (thrombin) Hs.76530 H65051	1	0.56	-0.33	0.89		-0.05	-0.47	-0.55	-1.33	-2.66	-2.44	-0.32	1.02	0.73	-0.33	-0.01	-1.58	-0.59	-2.66	0.64	0.1	0.22	1.45	1.41	1.25	0.15	0.03	0.84	1.51	0.43	-0.04	-0.83	-0.67	-0.08	-0.43	0.11	-0.95	-0.3	0.67	0.13	-0.39	-0.71	0.34	-0.31	0.49	0.62	0.28
GENE2754X	IMAGE:85678	115889 F2 coagulation factor II (thrombin) Hs.76530 T62075	1	0.61	0.07	0.82	-0.34	0.12	-0.16	-0.43	-1.53	-0.81	-2.06	-0.4	0.94	1.42	1.01	0.14	-1.73	0.86	-1.74	0.87	0.21	0.29	-0.28	0.84	1.73	1.18	0.66	0.88	0.96	0.39	0.22	-1.17	-0.68	-0.89	-1.18	-0.25	0.11	0.48	0.9	0.29	-0.62	-0.38	0.14	-0.81	-0.79	-0.03	-0.21
GENE5284X	IMAGE:68265	308492 AFP alpha-fetoprotein Hs.155421 T56880	1	0.36	0.29	0.57	-1.13	0.37	-1.21	0.14	-0.92	-1.01	-1.15	0.4	0.4	1.06	0.52	-0.51	-1.57	1.05	-0.97	0.06	0.22	-0.67	-0.1	1.27	1.51	1.72	0.91	0.22	1.46	0.09	-0.06	-1.05	-0.24	-0.83	-0.73	-0.43	-0.08	0.2	2.46	-0.2	0.26	-0.46	0.9	-0.59	-0.32	-0.35	-1.05
GENE5888X	IMAGE:1946026	313886 FLJ10884 hypothetical protein Hs.150890 AI341793	1	0.15	0.16	0.36	-0.72	0.11	0.22	-0.56	-0.59	-0.66	-0.53		0.53	0.47	0.28	0.11		0.88	-1.42	-0.18	0.5	0.09	1.55	0.75	0.51	0.63	0.16	0.96	-0.08	0.75	0.2	-0.16	-0.25	-0.37	-0.87	0.09	0.13	0.13	0.29	-0.41	0.01	0.33	0.57	0.04	0.05	-0.27	-0.94
GENE6680X	IMAGE:126413	99952 ITIH2 inter-alpha (globulin) inhibitor, H2 polypeptide Hs.75285 R06580	1	0.31	0.39	-0.08	-1.38	-0.1	-0.05	0.46	-1.69	0.28	-0.7	0.63	1.25	0.7	0.21	-1.25	-1.31	0.42	-1.62	1.12	0.52	0.61	1.08	0.75	0.26	0.94	0.75	-0.59	1.37	1.17	0.25	-1.4	-0.51	-0.63	-1.57	-0.76	0.35	0.19	0.66	-0.87	0	-0.52	-0.14	-0.04	0.69	-0.98	-1.7
GENE147X	IMAGE:436554	100822 MPO myeloperoxidase Hs.1817 AA703058	1	0.85	0.28	0.94	-0.8	0.78	-0.48	-0.64	-1.02	-0.47	0.04	0.88	1.61	0.93	-0.21	-0.49	-1.33	-0.06	-1.69	0.45	0.64	0.75	0.56	0.98	0.39	1.37	0.67	0.16	1.56	0.53	-0.46	-1.15	-0.61	-0.01	-1.08	-0.59	-0.25	0.45	1.2	-0.24	-0.82	-0.2	0.42	-0.22	-0.12	0.44	-1.21
GENE3054X	IMAGE:430314	117461 HPD 4-hydroxyphenylpyruvate dioxygenase Hs.2899 AA010605	1	0.16	0.18	1.09	-1.13	0.64	-0.09		-1.42	-0.81	-1.11	-0.53	0.36	0.95	0.09	-0.44	-2.2	0.43	-1.87	0.37	0.44	-0.01	0.4	1.4	0.46	1.02	0.61	0.41	0.99	0.45	-0.3	-1.37	-0.23	-0.43	-0.68	-0.34	-0.97	0.33	0.53	-0.14	0.06	-0.6	0.29	0.18	-0.01	0.33	-1.28
GENE4611X	IMAGE:1580342	225345 CARP cardiac ankyrin repeat protein Hs.31432 AA969184	1	0.19	-0.58	0.22	-1.79	0.24	0.61	0.42	-3.42	-0.37		-1	1.08	1.51	0.37	0.42	-1.89	1.07	-2.07	0.22	0.8	0.19	0.5	0.84	0.73	1.22	0.86	0.63	0.53	0.46	0.26	-1.65	-0.24	-0.68	-1.6	-0.74	2.3	1.25	1.12	0.19	0.51	-1	0.34	-0.35	-0.27	0.49	-0.72
GENE4205X	IMAGE:858188	222939 Homo sapiens cDNA FLJ32144 fis, clone PLACE5000105, highly similar to Mus musculus mRNA for heparan sulfate 6-sulfotransferase 2 Hs.82302 AA633866	1	0.48	0.47	0.55	-1.36	0.22	0	-0.21		-0.26	-0.84		0.42	1.34	-0.13	-0.31		0.55			0.28	-0.09	0.51	-0.37	0.1	0.64	0.3	0.69	1.42	0.17	0.09	-0.72	-0.47	0.66	-1.05	-0.78	-0.2	0.45	0.24	-0.14	-0.24	-1.01	0.54	-0.28	-0.48		-0.45
GENE1985X	IMAGE:1049185	111553 XAGE-1 XAGE-1 protein Hs.112208 AA620697	1	0.45	-0.32	0.49	-1.17	0.19	2.54	0.02	-1.49	-1.3	-0.49	-1.84	0.98	1.36	0.58	0.9	-0.73	0.82	-1.2	0.48	0.57	-0.17	0.67	1.61	1.14	1.01	0.45	0.78	0.76	0.29	0.37	-1.22	-0.24	0.38	-1.86	-0.87		0.2	0.84	0.58	-0.18	-1.39	0.34	-0.45	-0.82	-0.9	-0.24
GENE2821X	IMAGE:214068	116219 GATA3 GATA binding protein 3 Hs.169946 H72474	1	0.78	0.21	0.05	-1.49	0.79	-0.68	-0.38	-0.26	-0.52	-1.5	-0.43	1.08	0.89	0.52	-0.19	-1.68	1.09	-0.23	0.14	0.69	0.6	0.72	0.69	0.84	0.85	0.88	0.91	0.68	0.35	0.67	-0.97	-0.88	-0.71	-1.37	-0.66	0.12	0.79	0.98	-0.46	0.1	-1.19	0.45	-0.68	-0.74	-1.05	-1.37
GENE6291X	IMAGE:1839241	319400 SPANXA1 sperm protein associated with the nucleus, X chromosome, family member A1 Hs.334464 AI208372	1	1.54	0.8	1.35	-1.43	1.01	-0.51	-0.14	-2.18	-0.89		-1.63	0.92	1.02	0.94	-0.46		1.08	-1.74	-0.81	1.06	0.28	1.66	1.44	1.08	1.3	-0.27	1.06	1.21	0.54	0.3	-0.73	-0.22	-1.32	-2.07	-1.12	1.18	0.31	0.93	-0.75	-0.54	-0.29	1.37	-0.85	-1.03	-1.02	-0.96
GENE5158X	IMAGE:241516	307687 HPD 4-hydroxyphenylpyruvate dioxygenase Hs.2899 H90493	1	0.52	0.31	0.66	-0.3	0.71	-0.57	0.17			-1.54		0.41	0.62	-0.36	0.09		0.4		-0.59	0.83	0.25		0.22	1.08	0.9	0.47	0.53	0.34	0.21	0.11	-0.73	-0.14	-0.31	-0.68	-0.31	0.15	-0.03	0.52	-0.05	0.11	-0.27	0.96	-0.42	-0.34	-0.39
GENE3879X	IMAGE:1576709	221059 RNASE2 ribonuclease, RNase A family, 2 (liver, eosinophil-derived neurotoxin) Hs.728 AA984940	1	0.78	0.62	1.07	-0.94	0.33	-0.53	0.18		-0.81	-0.83		0.22	0.66	-0.08	-0.19	-2.72	-0.34	-1.43	-0.63	0.18	-0.01	-0.31	0.32	0.02	0.6	0.81	0.66	-0.23	0.35	-0.29	-0.56	-0.18	-0.53	-0.55	0.07	-0.15	0.68	0.46	-0.11	0.02	0.09	0.7	-0.37	-0.36	-0.44
GENE5378X	IMAGE:1858620	309152 DEFA4 defensin, alpha 4, corticostatin Hs.2582 AI250799	1	0.7	1.18	1.39	-0.78	1.26	-1.82	0	-1.92	-0.96	-1.79	-0.54	0.99	0.61	-0.74	0.51	-2.75	0.16		-0.13	0.82	0.1	0.73	0.54	0.79	0.81	1.09	0.58	0	0.53	0.44	-2	-0.88	-0.54	-1.11	-0.79	0.44	0.5	0.79	-0.09	0.38	-1.71	1.11	-0.95	-1.3	-0.37	-1.04
GENE2362X	IMAGE:768508	113597 FLJ10713 hypothetical protein FLJ10713 Hs.9536 AA425053	1	0.42	0.49	0.76	-0.86	0.94	-0.66	-0.47	-1.27	-1.09	-0.73	-0.21	0.74	0.33	-0.38	0.3	-1.03	0.35	-1.5	-0.57	0.66	0.34	1.02	1	0.65	0.32	0.3	0.03	-0.31	0.36	0.15	-0.12	-0.22	-0.56	-0.2	-0.11	0.63	-0.11	0.71	-0.67	0.48	-0.74	0.52	-0.3	-0.54	0.16	-0.98
GENE689X	IMAGE:271985	103925 TYR tyrosinase (oculocutaneous albinism IA) Hs.2053 N31933	1	0.8	0.46		-1.15	0.52	-0.44	0.18	-1.13		-1.98	-0.31	0.22	0.26	-0.73	0.18	-2.29	-0.43	-1.94	0.27	0.78	0.3	0.63	0.3	0.83	0.18	0.33	0.14	1.13	0.71	-0.02	-1.02	-0.41	-0.84	-0.79	-0.61	0.51	-0.42	0.36	0.18	0.34	-0.7	0.9	-0.82	-0.46	-0.12	-1.02
GENE5451X	IMAGE:1950782	309620 CD1B CD1B antigen, b polypeptide Hs.1310 AI336342	1	1.02	0.73	1.29	-1.07	1.28	-0.19	0.17	-2.96	-1.2	-1.35	-1.76	0.2	-0.24	-0.99	0.61	-1.86	-0.28	-2.43	-0.8	0.82	0.64	0.83	0.29	0.14	0.23	0.38	0.79	0.41	0.17	-1.34	-1	-0.98	-0.29	-1.22	-0.51	-0.02	-0.02	0.52	0.47	-0.15	-1.44	0.64	-1.36	-0.07	-0.7	-1.17
GENE983X	IMAGE:206795	105700 ASGR2 asialoglycoprotein receptor 2 Hs.1259 R98050	1	0.75	-0.15	1.09	-1.63	0.27	-0.43	0.21	-1.62	-0.56	-1.32	-0.33	0.31	0.19	-0.26	0.26	-2.1	-1.37	-1.34	-0.08	0.35	0.43	0.68	0.32	0.34	-0.03	0.05	0.38	0.85	-0.03	-0.8	0.26	0.82	0.43	-0.68	-0.08	-0.34	-0.22	0.15	-0.51	-0.25	0.37	0.93	-0.23	0.04	-0.72	-1.14
GENE5873X	IMAGE:1558675	313708 SOX10 SRY (sex determining region Y)-box 10 Hs.44317 AA976578	1	0.01	-0.61	0.68	-0.94	-0.13	-0.58	0.17	-1.51		-1.81	-0.9	-0.18	0.36	-0.82	-0.04	-1.68	0.76	-1.94	-0.52	0.21	0.28	0.89	1.07	0.08	0.39	0.28	0.5	0.29	0.16	0.32	-0.04	-0.27	-0.56	-0.43	0.95	0.46	-0.1	0.61	-0.37	0.9	-0.58	0.26	-0.45	-1.11	-0.14	-0.62
GENE3400X	IMAGE:266361	119617 MLANA melan-A Hs.154069 N26562	1	0.05	0.26	0.12	-1.39	0.43	0.05	0.23	0.15	-2.2	-2.38	-0.44	1.42	0.84	-0.59	0.41	-0.32	1.05	-1.5	-0.4	0.75	0.73	0.27	0.72	2.01	0.51	0.28	0.27	1.24	1.3	1.05	-0.53	-0.19	-0.69	0	-0.7	1.46	-0.09	1.56	0.86	1.13	-0.67	0.29	-0.14	-0.19	-0.83	-3.83
GENE4340X	IMAGE:298702	223732 G3A apolipoprotein M Hs.247129 N74679	1	0.85	-0.32	0.52	0.09	0.81	-0.6	1.17	-1.1	-1.58	-1.8	-0.31	1.02	0.78	-0.22	0.25	-0.55	0.18	-1.21	0.53	-0.71	-1.07	0.37	-0.4	0.88	0.17	0.29	0.09	-0.65	0.44	0.37	-0.86	-0.22	-0.67	-0.04	-0.45	0.14	-0.18	0.54	-0.23	0.06	-0.49	0.29	0.12	0.46	-0.75	-1.07
GENE6159X	IMAGE:1700429	317701 GFRA1 GDNF family receptor alpha 1 Hs.105445 AI049675	1	0.89		0.65		-0.41	2.59	-0.11			-3.8		0.49	0.36	0.6	0.71		0.28	-1.61	-0.77	0.61	0.29	0.41	0.5	1.07	0.54	0.47	1.03	0.18	0.23	-0.18	-1.3	-0.97	-0.78	-0.67	-1.18		0.7	0.12	-0.29	0.27	-1.62	0.49	-0.67	-0.97	-1.08
GENE5532X	IMAGE:1631487	310135 ESTs Hs.90286 AI024795	1	0.06	-0.13	0.73		1.01	-0.75	-0.12	0.8	0.32	-1.01	1.53	0.69	0.23	0.56	0.32	-1.6	0.9	-0.86	-0.42	0.52	0.87	0.33	0.44	0.44	-0.41	0.5	0.45	-0.4	-0.14	0.72	-0.88	-1.15	-0.53	-1.48	-1.21		0.57	0.23	-1.7	0.79	-0.55	0.85	-1.17	-1.54	0.88	-0.18
GENE5790X	IMAGE:1586535	312631 ESTs, Weakly similar to FXD3_HUMAN FORKHEAD BOX PROTEIN D3 [H.sapiens] Hs.120204 AA973879	1	0.52	-0.05	0.69		1.28	-1.03	-0.86	-0.53	0.66	-0.32	3.06	0.84	0.3	0			0.97	-1.56	-0.47	0.9	1	0.89	0.56	0.52		0.58	1.07	0.28	-0.07	0.15	-0.83	-0.39	-0.42	-1.73	-1.38		0.7	0.75	0.06	0.48	-0.57	1.2	-1.06	-1.16	-0.52	-0.68
GENE5001X	IMAGE:296815	247798	1	-0.45	0.52	1.3	-0.61	0.82	-1.24	0.15	-2.3	1.04	-1.61	3.64	0.46	1.17	-0.67	-0.29	-1.63	0.9		0.49	0.69	-0.13	1.18	1.92	0.06	0.84	0.39	0.18	0.2	0.52	0.45	-0.88	-0.24	-0.87	-0.83	-0.97		0.7	1.39	-0.81	0.97	-1.49	0	-1.26	-0.72	0.02	-0.81
GENE1654X	IMAGE:212429	109513 TF transferrin Hs.284176 H69531	1	1	-0.85	1.09	-0.53	-0.14	1.42	-0.5	-0.27	0.6	-2.79	-0.3	1.57	0.84	0.28	-1.15	-1.47	0.62	-2.47	0.97	0.39	0.78	0.59	1.81	1.31	1.67	-0.03	-0.21	1.4	0.37	0.63	-1.65	0.26	0.19	-2.18	-0.68	-0.22	0.36	0.96	1.07	0.22	-0.04	0.15	-0.96	-0.29	-0.39	-0.34
GENE6536X	IMAGE:488276	99129 **Homo sapiens cDNA FLJ12742 fis, clone NT2RP2000644 Hs.273830 AA085759	1		0.68	1.2	-0.56	-0.26	0.47	0.08	-0.65	0.46	0.24		0.57	0.92	0.71	-0.22	-0.52	0.5		-0.46	0.27	-0.03	0.89	0.63	0.32	0.85	0.84	0.63	0.75	1.02	0.89	-0.6	-0.62	-0.37	-1.34	-0.47	0.2	0.46	0.76	-0.4	0.1	-0.35	-0.12	-0.14	-0.31		-0.6
GENE1017X	IMAGE:782730	105870 ALDH1A2 aldehyde dehydrogenase 1 family, member A2 Hs.95197 AA447978	1	-0.4	-0.35	-0.37	-0.33	0.26	-0.27	0.45	-0.89	-0.75	-1.66	-0.53	0.33	0.54	0.31	-0.74	-1.09	0.7	-1.51	-0.94	0.54	-0.04	1.95	1.32	0.33	0.7	-0.3	1.48	-0.04	0.28	0.47	-1.43	0.66	0.44	-1.18	-0.35	0.13	-0.29	0.92	0.46	0.03	-0.34	0.27	-0.32	-0.39	-0.24	-0.56
GENE2160X	IMAGE:773976	112495 FABP7 fatty acid binding protein 7, brain Hs.26770 AA436624	1	0.35	-0.23	-0.06	-1.25	-0.76	-0.12	0.72	-0.75	-1.73	-1.36		0.6	0.34	0.3	0.07		1.02	-1.74		-0.69	-0.39	0.52	2.04	0.89	1.65	0.29	-0.35	1.2	1.11	-0.24	-1.62	-0.42	-0.74	-1.41	-0.69	-0.71	-0.19	0.52	0.42	0.45	-1.51	-0.15	-0.63	-0.41	3.38	-1.55
GENE5659X	IMAGE:1561409	311042 PUNC putative neuronal cell adhesion molecule Hs.189847 AA953395	1					-0.69	-0.27	0.74			-1.32	2.24	1.46	0.75	-0.08	-1.58	-2.78	0	-2.12	0.03	0.14	0.5	1.49	0.72	0.53	0.84	-0.75	0.5	0.83	0.43	1.95	-0.21	0.15	0.43	-0.94	0.08	0.87	-1	0.17	-0.25	1	-0.2	0.51	0.03	-0.19		-0.7
GENE887X	IMAGE:291706	105151 Homo sapiens, clone MGC:16101 IMAGE:3621376, mRNA, complete cds Hs.285410 N73480	1	-0.24		0.01	-0.55	-1.25	0.63	0.26	-0.77	-1.2			1.24	0.64	0.1	-1.39	-1.34	-0.01	-1.45		-0.04	0.59	0.42		1.24	0.54	-0.08	0.13	1.61	0.77	0.68		0.63	-0.05	-0.31	-0.23	0.06	-0.24	0.36	0.65	0.34	-0.08	0.42	0.08	0.03	-0.36	-0.25
GENE2769X	IMAGE:195903	115990 FLJ20624 **hypothetical protein FLJ20624 Hs.52256 R92227	1	0.34	-0.2	0.31	0.04	0.12	-0.22	0.37	-0.39	0.09	-0.01	2.49	0.34	0.96	-0.01	-1.37	-0.36	-0.11	-0.46	1.41	-0.22	-0.2	0.44	0.93	1.36	1.23	0.31	1.13	0.92	1.06	0.07	-0.61	-0.46	-0.23	-0.01	-0.29	-0.02	0.06	0.99	0.13	-0.36	-0.53	-0.13	-0.41	0.57	0.77	-0.35
GENE2169X	IMAGE:204541	112536 ASGR1 asialoglycoprotein receptor 1 Hs.12056 H58255	1	0.34	-0.26	-0.02	-0.7	-0.47	-0.02	0.15	0.14	0.42	-0.9		0.63	1.06	-0.12	-1.38	-0.86	0.35	-1.52	1.06	-0.45	-0.33	0.49	1.2	1.21	0.47	0.16	0.6	0.99	0.77	0	-0.68	-0.54	1.46	-0.84	-0.02	0.07	-0.25	0.63	-0.08	-0.16	-0.18	1.68	-0.44	1.16	-0.29	-1.22
GENE3484X	IMAGE:130057	120082 STC2 stanniocalcin 2 Hs.155223 R20779	1	-1.12	-0.81	-1.37		0.43	-0.6	0.54	-0.73	2.57	-0.34	1.05	2.72	2.07	1.29	0.26	-1.2	-0.03	-0.46	1.61	-1.28	-1.21	0.64	1.56	2.02	1.41	0.13	1.99	0.06	-0.56	-0.15	-0.29	-0.96	0.78	-0.92	-0.19	0.5	0.53	1.36		0.16	-0.4	-0.52	-0.52	-0.22	-1.41	-1.07
GENE1300X	IMAGE:823578	107590 STC2 stanniocalcin 2 Hs.155223 AA497040	1	0.04	-0.61	0.07	-0.85	-0.7	-0.07	1.04	-1.42	2.52	-1.49		2.45	2.24	1.31	-0.52	-0.61	1.33	-1.02	-0.65	0.65	0.88	-0.37	1.11		0.65	-0.01	1.85	0.54	0.16	0.51	0.24	0.02	0.75	0.4	0.39	0.59	0.54	1.55	0.43	0.65	0.29	0.19	0.15	0.2	-1.67	-1.65
GENE598X	IMAGE:22389	103368 FLJ21963 hypothetical protein FLJ21963 Hs.13222 T74065	1	0.24		0.04	-0.38	-0.3	0.15	0.02	-1.08	3.7	-0.75	1.37	1.68	0.4	0.63	-0.2	-1.94	0.12	-1.4		0.49	0.36	-0.25	0.33	1.4	0.9	-0.21	0.2	0.74	0.02	-0.25	-0.17	-0.12	-0.12	-0.41	0.27	-0.3	0.47	0.9	-0.25	-0.22	-0.24	-0.2	0.08	0.17	-0.16	-1.07
GENE4013X	1239859	221898 KIAA0786 latrophilin Hs.24212 AA705981	1		0.28	0.36	-0.87	-0.97	0.21	0.27				0.53	0.84		0.84	-0.45		0.68			0.67	0.02	-0.35	0.36	1.03	0.43	0.4	0.07	0.22	-0.46		-0.61	-0.43	0.21	-0.83	-0.7	0.64	0.51	0.31	0.34	0.27	0.1	0.3	-0.24	-0.63	0.67	-0.09
GENE2142X	IMAGE:44563	112391 GAP43 growth associated protein 43 Hs.79000 H05445	1	0.21	-0.41	0.02	0.03	0.03	0.17	0.61	0.48		-1.99		1.26	0.77	0.34	-0.39	-0.38	0.53		0.72	0.13	-0.01	-0.38	0.66		0.58	-0.06	0.51	0.2	0.46	-0.24	0.2	-0.66	-0.06	-0.25	0.2	0.33	0.47	0.75	0.46	0.4	-0.04	-0.65	0.11	-0.33	-0.12	-1.43
GENE1445X	IMAGE:196444	108389 DLX4 distal-less homeobox 4 Hs.172648 R92495	1	-0.64	-0.85	-0.85	-0.81	-0.36		0.68	0.29			3.31	0.45	0.9	0.08	-1.08	-0.06	-0.03		-0.01	0.01	-0.1	-0.03			0.66	0.66	0.45	0.1	0.11	-0.56	-0.24	-0.21	-0.02	-0.19	0.34	0.56	-0.01	1.18	0.11	0.51	-0.11	-0.84	-0.31		1.11
GENE2586X	IMAGE:208078	114888 ESTs Hs.37776 H59804	1	0.8		-0.11	-0.55	-0.67	0.34	-0.15	-0.81		-1.16	2.19	2.19		0.9	-2.69		-0.13		0.93	0.13	0.8	1.59		0.42	1.08	-0.77	1.45	1.24	1.52	0.52	-1.49	-0.69	2.23	-2	-1.62	1.35	0.86	0.38	0.71	0.23	0.04	0.35	0.53	1.2	3.44	-1.65
GENE5084X	IMAGE:786156	307263 PEG3 paternally expressed 3 Hs.139033 AA447919	1			-0.13	-0.61	-0.35	0.12	-0.11	-1.07	-0.16	-0.11	-0.52	1.08	0.23	0.87	-0.14	-0.4	0.9	-1.06		-0.39	0.36	0.62	0.19	0.28	0.73	-0.34	-0.19	0.19	0.66	0.49	-0.65	-0.21	-0.18	-1.23	-0.01	0.26	-0.12	-0.05	0.56	0.27	-0.81		-0.22	-0.82	-0.95	-0.73
GENE2930X	IMAGE:965839	116783 GFRA1 GDNF family receptor alpha 1 Hs.105445 AA512935	1	0.11	0.16	-0.66	-0.82	-0.61	2.46	0.9	-1.31				0.81	0.08	0.4	-1.32	-1.13	-0.33			-0.37	0.07	0.37	1.23	0.43	0.59	-0.06	-0.3	0.05	-0.74	-0.37	-0.86	-0.13	-0.49	-1.76	-0.12	0.65	-0.4	0.5	0.17	1.21	0.41	-0.13	-0.25	-0.07	-1.1	-1.36
GENE5045X	IMAGE:1629227	307021 GJA7 gap junction protein, alpha 7, 45kD (connexin 45) Hs.43761 AI003367	1	-0.28	0.41	-0.29	0.02	0.23	0.96	0.69	-1.41	-0.09		-0.43	1.53	0.43	1.01	-0.69	-1.45	0.5	-0.61	0.47	0.29	0.92	0.43	0.61	0.16	0.12	-0.19	-0.93	0.45	0.13	0.39	0.03	0.15	-0.18	-1.15	-0.38	0.53	0.32	-0.34	1	0.81	-0.36	0.01	0.29			-1.06
GENE2063X	IMAGE:739155	111928 CDH6 cadherin 6, type 2, K-cadherin (fetal kidney) Hs.32963 AA421819	1	0.55		0.86	-0.61	0.21	0.85	0.87	-1.35	-1.17	0.06		2.52	-0.13	1.04	-0.96	-2.21	0.03	-0.41	2.03	-0.25	0.2	0.93	0.46	-0.11	-0.21	-0.75	-1.34	2.24	-0.17	0.44	0.31	-0.2	-0.05	-0.81	0.02	0.39	0.44	0.89	0.02	0.05	0.97	0.5	0.16	-0.32	-0.35	-0.86
GENE1402X	IMAGE:666377	108118 ZNF161 zinc finger protein 161 Hs.6557 AA232647	1	0.03	0	0.46	-1.24	-0.39	0.87	0.2	0.81	-0.23	-0.7	-0.1	0.83	0.47	0.47	-1.04		0.47	-1.85	0.93	0.26	0.34	0.87	0.69	0.43	0.53	0.03	-0.24	0.74	0.24	0.65	-0.37	-0.1	0.01	-0.22	-0.54	0.98	0.41	0.47	0.15	0.28	0.3	-0.25	0.15	-0.03	-0.24	-0.08
GENE3438X	IMAGE:281778	119864 TGFB2 transforming growth factor, beta 2 Hs.169300 N48082	1	0	-0.33	-1.46	-0.86	-0.57	2.63	0.04	3.05	-0.01			1.72	-0.43	0.6			-0.46	-0.13		-0.05	-0.07	0.99	0.16	-0.65	-0.31	-0.26	-0.92	-0.34	-0.02	-0.07	-0.47	-0.2	0.14	0.16	-0.62	2.91	1.52	0.86	-0.56	0.37	0.3	-0.54	0.96	0.05	0.84	-1.63
GENE6143X	IMAGE:1897991	317523 PEG10 paternally expressed 10 Hs.137476 AI299566	1	0.73		-0.23	-1.46	1.2	0.03	1.13			-1.29	-0.42	1.5	0.11	0.83	-0.6		-0.4		-0.52	0.6	3.16	0.41	0.17	-0.56	0.11	-0.96	-0.51	0.96	-0.93	0.05	-0.83	-0.16	-0.5	-0.34	-0.79	1.87	1.92	-0.72	0.93	0.45	-0.5	0.37	0.58	-0.07	1.17	-0.24
GENE2571X	IMAGE:122274	114820 LTBP1 latent transforming growth factor beta binding protein 1 Hs.241257 T98782	1	0.3		-0.27	-0.81	0.28	-0.02	0.78	0.98				0.54	-0.14	0.36	0.43		0.27	-0.7	0.81	0.06	0.19	-0.57	-0.16	0	0.41	-0.49	-0.3	0.64	0.51	-0.37	-0.46	0.04	-0.35	0.5	0.29	0.62	0.05	-0.23	0.03	0.54	0.39	0.28	0.38	-0.22	0.3
GENE6651X	IMAGE:160723	99824 LAMC1 laminin, gamma 1 (formerly LAMB2) Hs.214982 H24649	1	0.71	0.22	-1.19	-0.7	-0.2	0.51	0.98	0.42	0.51	-0.01	0.01	1.03	0.28	0.58			-0.71		-0.32	0.98	0.63	0.1	-0.12	-0.06	0.41	-0.94	-0.58	0.54	-1.05	-0.18	-0.6	0.52	-0.35	0.22	-0.36	0.98	0.38	-0.25	0.19	0.87	0.62	-0.1	0.85	0.44	0.36	0.06
GENE1966X	IMAGE:263200	111367 ESDN endothelial and smooth muscle cell-derived neuropilin-like protein Hs.173374 H99543	1	0.46		-0.13	-0.27	0.57	0.48	1.25	0.15	0.21	0.48	0.6	0.7	0.42	0.59	0.55	-0.07	-0.17	-0.81	0.61	0.16	0.37	-0.52	0.19	-0.48	-0.45	-0.5	-0.14	0.74	-0.66	0.52	0.35	0.22	-0.27	0.87	-0.05	2.59	-0.51	2.11	0.22	0.36	-0.28	0.35	0.11	0.48	0.16	0.12
GENE2019X	IMAGE:767365	111741 ESTs, Weakly similar to C4HU complement C4A precursor [H.sapiens] Hs.55964 AA418546	1	0.56	0.16	0.22	-0.24	0.53	-0.64	-0.05			-0.27	0.91	0.12	0.64	-0.13	0.12		0	-0.76	0.32	0.2	0.43	0.87	0.39	-0.18	0.16	0.2	-0.57	0.44	0.12	0.59	-1.29	-0.17	-0.28	-1.08	-0.15		3.01	0.62	0.26	0.35	0.06	-0.03	0.69	-0.19	0.59	1.18
GENE534X	IMAGE:67055	103007 ESTs, Highly similar to Gene product with similarity to Multidrug resistance protein MRP1 [H.sapiens] Hs.13188 T70337	1	-0.06	0	0.56		0.06	0		0.46	1.16			1.18	-0.03	-0.02	-0.73		0.44			0.27	1.58	0.01	-0.12	0.09	0.34	-0.2	-0.46	-0.52	0.63	1.4		-1	0.47	-1.81	-1.55		0.86	-0.03	-0.58	0.65	-0.51	0.31	-0.21	-0.43	-0.06	-0.26
GENE3142X	IMAGE:193892	118015 PEG10 paternally expressed 10 Hs.137476 H51765	1	0.24	-0.49	-0.5	-0.76	-0.51	-0.58	0.61	0.22	1.46	0.51		1.72	-0.4	-0.66	-0.62	-0.41	0.59	-0.02	-0.5	0.45	2.86	0.84	0.1	0.04	1.14	0.72	0.21	-0.7	0.95	0.62	-0.73	-0.48	-0.35	-0.54	-0.69	1.25	1.56	0.06	-1.81	1.03	-1.6	-0.66	0.65	0.33	0.49	0.13
GENE163X	IMAGE:113257	100941 PHGDH phosphoglycerate dehydrogenase Hs.3343 T83646	1	0.17	0.23	-0.43	-0.68	0.15	0.88	0.21	1.11	2.15	-0.85		0.8	1.87	-0.16	-1.06	-1.78	1.01	-2.05	0.75	0.27	0.49	0.81	-0.81	0.93	1.3	0.67	1.97	-0.6	0.18	0.85	-1.08	-0.7	-0.2	-1.65	-1.05	0.71	1.38	1.03	-1.2	0.83	-0.64	-0.19	1.1	1.03	0.11	1.55
GENE6262X	IMAGE:1868551	319021 TTR transthyretin (prealbumin, amyloidosis type I) Hs.194366 AI261783	1	0.36	0.25	0.26	-1.72	0.64	-1.07	-0.81		-1.17	0.39		1.09	0.79	0.84	-0.5	-1.92	0.92		0.1	0.83	0.11	0.66	1.12	0.12	1.03	0.51	0.61	0.97	-0.8	0.08	-1.99	-1.14	-0.26	-2.13	-1.81	0.44	-0.21	0.6	0.15	-1.12	0.22	0.93	-0.98	-0.61	-1.64	-1.05
GENE5705X	IMAGE:2237353	311576 GAL galanin Hs.1907 AI623173	1	2.33	0.31	1.04	-0.48	0.49	-1.12	0.16	1.3		2.1	0.18	1.2	0.17	-0.67	-1.16		0.69	-0.8	-1.59	0.53	1.46	-0.13	0.56	0.22	1.05	1.97	2.26	0.91	0.25	-0.57	-1.36	-0.39	0.88	-0.9	-0.97	0.72	0.2	0.47	0.71	0.11	-0.79	0.67	-0.63	-0.72	-0.24	0.35
GENE3988X	IMAGE:277480	221737 Homo sapiens cDNA FLJ25045 fis, clone CBL03591 Hs.148074 N48738	1	-0.3			-0.98	-1.1	2.07	-0.36	2.58	-0.35	1.78	3.2	1.27	0.38	-0.41	-2.28		-0.73	-2.42	0.66	2.3	1.04	0.87	1.58	1		1.52	1.87	0.94	0.07	-0.09	-0.34	-0.58	0.32	-0.86	-0.57	-0.55	-1.33	-0.29	0.1	-0.18	0.26	0.74	-0.52	0.33	-0.11	0.11
GENE5223X	IMAGE:1551201	308109 Homo sapiens cDNA FLJ25045 fis, clone CBL03591 Hs.148074 AA933730	1	-0.12	0.34	0.19	-0.68	0.08	1.78	-1.23	2.37	-0.34	2.11	2.72	1.21	0.17	0.62	-0.85		0.06	-1.75	0.53	1.49	0.98	1.13	1.32	0.97	0.34	1.56	1.15	0.95	-0.55	0.65	-0.82	-1.19	0.25	-1.08	-1.07	-0.34	0.37	0.1	0.23	0.45	-0.57	0.35		-0.32	-0.15	0.46
GENE4216X	IMAGE:884333	222984 ESTs Hs.5888 AA629528	1	-0.06	-0.03		0	-0.15	-0.02	-0.19	0.78	0.41	-0.19	0.35	1.1	0.1	-0.18	-1.24	-1.87	0.29	0.28	0.27	-0.35	-0.07	0	-0.55	-0.26	0.41	0.33	0.35	0.24	0.28	-0.27	0.29	0.36	-0.57	2.07	0.46	0.32	-0.1	-0.65	0.17	0.27	0.52	1.01	0.98	0.49	0.44	-0.29
GENE1938X	IMAGE:785930	111189 HOXA4 homeo box A4 Hs.77637 AA448557	1	0.09	-0.3	0.16	-0.94	-0.03	-0.57	0.05	1.14	0.72	-0.73	0.85	0	0.58	-0.84	-0.82	-1.77	-0.3	-0.28	0.68	0.2	-0.01	0.02	0.23	0.51	0.32	-0.12	0.14	0.18	-0.19	-0.49	-0.75	-0.39	-0.11	1.42	-0.1	-0.1	0.3	0.11	-0.1	0.17	-0.04	0.7	0.42	-0.02	-0.03
GENE4643X	IMAGE:450764	225525 ESTs, Weakly similar to T43446 hypothetical protein DKFZp434D0917.1 [H.sapiens] Hs.119824 AA704490	1	-0.29			-0.3	-0.84	-0.46	0.01	1.68	0.01	0.31	-0.05	0.76	0.34	-0.14	0.29	-1.54	0.76	-0.74		0.05	0.35	0.09	-0.03	0.4	0.65	-0.54	0.08	0.09	-0.09	-0.29	-0.41	-0.45	-0.48	2.18	0.72	0.32		0.36	0.01	0.35	-0.35	-0.01	-0.41	-0.22	0.48
GENE5733X	IMAGE:1931664	311953 FLJ13231 hypothetical protein FLJ13231 Hs.156148 AI333214	1		-0.5	-0.12	-0.56	-0.33	-1.11	0.03	1.95	-0.84	1.36	2.33	1.77	0.38	-1.41	-0.41		-0.37	-0.05	-0.21	0.79	0.96	0.1	-0.02	0.29	0.24	-1.05	0.42	-0.51	0.72	0.65	-1.41	0.46	-1.01	1.68	0.14	0.24	-0.73	0.77		-0.49	0.21	-0.5	-0.66	-0.41	0.91	-0.6
GENE5742X	IMAGE:1909706	312038 EST Hs.156590 AI342954	1	-0.13	-0.55	-0.56	-0.49	-0.8	1.11	0.5	1.4	0.23	0.26	1.19	1.51	-0.75	-1.17	-1.24	-0.84	0.37	-1.59		1.19	1.88	-0.42	-0.18	-0.39	-0.82	0.18	0.47	-0.11	0.9	0.65	-1.45	-0.64	0.33	0.86	-0.5	0.1	-0.1	0.7	-0.34	0.5	-0.29	0.48	0.28	0.22	0.99
GENE4476X	IMAGE:502436	224421 IRS2 insulin receptor substrate 2 Hs.143648 AA134861	1	-0.28	-1.14	-0.9	-1.15	-0.48	1.42	0.03	1.87	0.19	0.11	1.55	1.21	-0.78	-1.24	-1.44	-1.65	0.59	-1.34	-1.13	1.35	2.17	0.12	0.11		-0.76	-0.16	0.26	0.11	1.02	0.74	-2.04	-0.78	0.45	0.65			-0.42	1.03	-0.03	0.46	-0.73	0.29	0.23	0.06	1.18	-1.89
GENE4600X	IMAGE:297908	225268 FLJ23058 hypothetical protein FLJ23058 Hs.98968 N68942	1	0.25			-0.99	-1.17	0.66	-0.32	0.09	-0.92		1.78	0.1		-0.93	-1.23	-1.96	-0.56	0.16	-0.46	0.58	0.81	-0.53	-0.18	0.02	0	2.26	-0.09	0.42	0.97	1.55	-0.22	-0.86	-0.21	-0.5	-0.53	-0.24	-0.11	-0.15	-0.17	0.09	-0.52	0.06	-0.28	-0.28	1.51	-0.81
GENE3807X	1239845	220598 ESTs Hs.87767 AA705977	1		-0.24	0.24		-0.69	-0.16	0.14	1.81	-1.55		0.15	0.18		-0.36	-1.11		-0.63		0.82	-0.06	1.16	-0.57	0.69	-0.05	-0.22	-0.06	-0.06	0.23	1.05	0.67	0	-1.08	0.19	0.03	-0.2	0.52	0.77	-0.31	-0.64	0.26	-0.35	-0.05	0.02	-0.43
GENE3171X	IMAGE:986643	118161 PRX2 paired related homeobox protein Hs.86172 AA548667	1	0.03	-1.01		0.34	-0.8	1.36	2.69	-0.08	-0.94	0.76		0	0.03	-0.69	-1.4			0.77		-0.82	0.09	-0.96	0.38			0.25	-0.37	0.59	-0.44	0.14	0.08	-0.22	0.06	-0.47	-0.34	0.23		-0.03	0.06	-0.21	-0.85	-0.23	-0.58	-0.48	0.42
GENE5257X	IMAGE:754451	308336 KIAA0934 KIAA0934 protein Hs.227716 AA410299	1	-0.08		-0.48	0.27	-0.51	0.41	0.86	1.42	0.15	1.31	-0.44	0.81	-0.76	-0.64	-0.62	-2.17	-0.87	-0.11		-0.03	-0.18	0.01					-0.61	0.21	-0.17	-0.87	-0.12	-0.33	0.5	0.01	0.15	0.47			-0.46	0.27	0.35	-0.6	-0.02	-0.11	1.41	-1.33
GENE637X	IMAGE:771010	103576 ESTs, Weakly similar to I38022 hypothetical protein [H.sapiens] Hs.38489 AA427722	1	-0.16	-0.82	-0.17		-0.12	1.29	0.41	1.84	-0.48	0.36	0.94	0.77	0.2	0.57	0.26	-1.47	-0.02	0.25	0.46	0.25	-0.19	-0.72	0.39	0.29	-0.23		-0.27	-0.21	-0.76	-0.58	-0.64	-0.48	-0.54	-0.46	-0.4	0.25	0.04	0.55		0.31	-0.53	-0.49	0	-0.28	0.89	-1.94
GENE5606X	IMAGE:1626129	310631 ESTs Hs.130628 AI005150	1	-0.27		-0.44		-0.67	0.16	0.56	0.55	-0.27	-0.33	0.61	0.85	0.14	0.14	0.12	-1.76	-0.36	-0.55	0.37	-0.34	1.03	-0.43	0.35	-0.18	-0.78	-0.34	-0.54	-0.29	-0.48	-0.63	-0.64	-0.57	0.14	-0.59	-0.08	0.5		0.18		-0.5	-0.05	-0.2	-0.41	-0.06	0.33
GENE3093X	IMAGE:32962	117713 Homo sapiens cDNA FLJ12935 fis, clone NT2RP2004982 Hs.22545 R18800	1	0.27				0.28		1.23	-0.49			2.49	1.34	-0.25	0.44		-1.18	0.16			-0.32	-0.01	-0.55	0.25	-0.04	-0.34	-0.59	-0.76	0.01	-1.64	0.25	-0.24	0.06	1.74	-1.05	-0.94	0.69	0.01	-0.22	-0.51	-0.05	-0.36	-1.42	0.54	0.41	-1.2	0.15
GENE185X	IMAGE:625740	101086 DRCTNNB1A down-regulated by Ctnnb1, a Hs.85603 AA186951	1	0.58			0.29	0.01	0.24	0.95	-1.31				0.39	0.33	0.79	0.06	-0.91	0.34		0.41		0.01	-0.82	0.29	0.26	-0.2	-0.11	-0.32	-0.04	-1.96	0.37	-0.12	0.2	-0.53	-0.61	-0.93	0.9	0.58	-0.24	0.25		0.18	-1.07	-0.65	0.55	0.92	0.11
GENE5371X	IMAGE:143332	309117 NPY1R neuropeptide Y receptor Y1 Hs.169266 R74183	1	0.38	0.21	0.77	0.03	1.05	0.18	1.02		0.07			-0.44	0.47	0.84	0		0.44			-0.77	0.2	-1.27	0.51	0.1	0.25	-0.42	-0.09	0.03	-0.11	0.15	-0.15	0.19	-0.26	-0.08	-1.14	0.33	0.37	-0.23		-1.03	-0.12	0.19	-0.72	0.29		0.22
GENE3679X	IMAGE:365681	178406 GATA3 GATA binding protein 3 Hs.169946 AA025379	1	0.82		-0.32	-0.27	0.53	0.26	1.18	0.09		-0.88		-0.89	-0.43	0.58	0.08		0.31		-1.09	0.11	0.14	-1.05	0.03	-0.37	-0.71	-0.84	-0.8	-0.01	-1.45	0.25	-0.53	0	-0.68	-1.15	-0.22	0.78	0.85	-0.61	0.24	-1.27	-0.96	-0.11		-0.29	-0.72	-0.37
GENE6341X	IMAGE:1876207	320041 PRTN3 proteinase 3 (serine proteinase, neutrophil, Wegener granulomatosis autoantigen) Hs.928 AI273534	1	-0.32	-1.3	-0.17	-0.56	1	0.03	1.49			-0.55	-0.98	-0.56	0.14	0.76	0.2		0.38	-2	-1.65	0.24	0.65	-0.61	0.59	-0.1	-0.99	-0.58	-0.8	0.64	-0.67	1.07	-0.17	0.89	-0.4	-0.21	-0.8	1.29	-0.66	-0.44	0.42	-0.62	-0.98	0.55	0.53	0.11	0.06	0.04
GENE6138X	IMAGE:195905	317436 HPD 4-hydroxyphenylpyruvate dioxygenase Hs.2899 R91878	1	0.08		-0.86	-0.49	-0.33	0.22	2.62	-0.54	-0.06	-1.05		-0.1	0.61	0.64	-1.07	-0.06	0.1	-1.49	0.12	-0.3	0.78			0.31	-0.19	-1.02	-0.23	0.87	0.24	1.5	0.43	0.48	-0.23	-0.65	-0.29	1.07	0.29	-0.1	0.39	-0.07	-0.58	-0.18	-0.74	0.03	-1.54	-0.85
GENE2573X	IMAGE:125308	114838 MPO myeloperoxidase Hs.1817 R05801	1	-0.05	-1.24	-0.86	-0.89	0.15	1.38	0.82	-1.43	-2	-2.51	-2.02	-1	0.33	0.28		-1.83	-0.28		-1.13	0.29	0.34	-1.09	-0.2	0.15	-0.46	-1.38	-0.58	0.01	-0.65	0.11	0.29	0.95	0.21	0.74	-0.08	1.88	-0.07	-0.77	1.17	0.23	-0.35	0.1	-0.3	0.33	0.16	0.04
GENE6523X	IMAGE:359285	99053 CPA4 carboxypeptidase A4 Hs.93764 AA016234	1	0.05	-0.17	-0.83	-0.52	0.23	0.4	1.28	-0.47		-1.4	-1.21	0.63	0.39	0.25	-0.33	-1.64	-0.23	-1.02	-0.88	-0.53	0.51	0.22	1.37	0.58	0.74	-0.18	0.22	0.71	0.11	1.19	-0.45	-0.49	1.13	0.13	-0.14	-0.1	0.77	1.22	-0.24	0.79	-0.58	0.38	0.16	0.21	-0.48	-0.51
GENE3198X	IMAGE:155716	118371 NRG1 neuregulin 1 Hs.172816 R72075	1	0.34	0	-0.42	-0.98	0.77	0.23	0.69	-0.92	0.61	-0.38	0.32	1.78	0.33	1.56			-0.17	-0.77	-0.12	0.74	0.2	-0.59	-1.17	-0.25	0.34	-0.65	-0.08	0.22	-0.44	0.23	-0.63	-0.37	0.57	0.04	-1.27	1	0.3	-0.53	0.7	0.44	-0.64	-0.54	0.36	1.24	-0.78	-0.97
GENE3275X	IMAGE:241160	118828 NR1H4 nuclear receptor subfamily 1, group H, member 4 Hs.171683 H91102	1	0.5	0.35	-0.17	-0.68	0.47	0.04	0.82	-0.24	-0.66			0.15	-0.09	0.25			-0.2		-0.57	0.04	0.04	-0.57	-0.69	0.12	0.1	-1.12	-0.3	0.23	-0.27	0.41	-0.66	-0.15	-0.03	0.92	-1.27	0.47	0.02	-0.69	0.57	0.4	0.13	-0.13	0.06	0.38	-0.48	-0.13
GENE4316X	IMAGE:432477	223589 ESTs Hs.113170 AA699493	1	0.01			-1.05	-0.1	-0.03	1.15	-1.11		-1.5		0.78	1.08	0.55		-0.76	-0.11		-0.54	0.16	0.77	-0.09	0.5	0.31	-0.08	-0.1	0.56	1.3	0.25	1	0.31	0.07	0.15	0.81	0.08	-0.06	-1.16	-0.34	0.58	-0.36		0.27	-0.21	0.36	-0.1	-0.35
GENE4609X	IMAGE:1048769	225340 Homo sapiens, Similar to RIKEN cDNA 1700010L19 gene, clone MGC:27019 IMAGE:4831157, mRNA, complete cds Hs.352285 AA626939	1	0.14	-0.15	-0.18	-1.78	0.56	0.98	0.05	0.87	0.36	-0.55	0.07	-0.98	0.08	-0.77	-0.12	-1.13	0.22	-1.15	-0.28	0.49	0.09	0.73	0.42	-1.09	0	-1.36	0.61	0.54	0.87	0.95	0.72	-0.26	0.55	0.43	0.22		-1.16	-0.36	0.49	0.4	0.5	0.92	-0.75	-0.68	1.22	-1.02
GENE1055X	IMAGE:429093	106097 Homo sapiens, Similar to RIKEN cDNA 1700010L19 gene, clone MGC:16214 IMAGE:3659061, mRNA, complete cds Hs.103441 AA007586	1	0.22	-0.27	-0.39	-1.29	0.2	1.05	0.26	1.33	0.93	-0.33	1.03	0.31	0.12	-0.25	-0.44	-2.5	0.51	-1.39	-0.43	0.58	0.03	0.39	0.02	-0.67	-0.09	-0.96	0.43	0.26	0.94	1.26	0.31	-0.76	0.3	-0.05	-0.28	0.15	-1.15	-0.1	1.13	0.68	0.64	0.96	-0.51	-0.58	0.85	-0.83
GENE1833X	IMAGE:731255	110583 Homo sapiens, Similar to RIKEN cDNA 1700010L19 gene, clone MGC:16214 IMAGE:3659061, mRNA, complete cds Hs.103441 AA420992	1	0	-0.28	-0.35	-1.17	0.78	1.2	1.42	0.03	0.89	0.07	1.23	0.9	-0.24	-0.19	-0.39	-1.78	0.23	-0.01	0.18	0.24	0.23	0.5	-0.54	-1.18	-0.73	-0.8	0.33	0.57	0.61	0.82	0.62	-1.18	0.62	0.35	0.01	-0.19	-1.8	-0.39	1.15	0.95	0.93	1.04	0.23	-1	1.16	-0.04
GENE2104X	IMAGE:143654	112190 ESTs Hs.352322 R75884	1	-0.67	-0.41	-0.03	-1.55	-0.31	1.99	1.54	0.68	0.08	-1.67	-0.18	0.89	0.21	-0.47	-0.5		0.05	-0.09	0.23	0.69	0.23	0.2	0.26	-0.3	-0.61	-0.61	0.32	0.65	0.65	0.43	0.27	-0.48	1.26	0.44	0.37	0.22	-1.15	0.43	0.54	0.56	1.01	0.89	1	0.31	1.29
GENE5955X	IMAGE:1875462	314687 Homo sapiens PNAS-130 mRNA, complete cds Hs.149424 AI272896	1	0.94			-0.04	-0.12	1.64	1.9	0.12	2.28	-0.49		1.74	0.39	0.37			-0.22		-0.27	0.11	0.56	0.03	0.44	-0.01	-0.57	-0.94	-0.15	0.9	-0.16	0.62	0.44	-0.71	0.6	-0.41	-0.31	0.07	-0.25		1.68	0.78	-0.22	0.22	-0.35	-0.39		-0.05
GENE6174X	IMAGE:1902462	317863 AF038169 hypothetical protein Hs.145567 AI302788	1	0.38	-0.08	0.03	-0.92	0.1	0.81	0.34	0.9	1.63	-0.51	1.19	0.76	0.27	0.56	-0.74	-2.49	0.64		0.09	0.53	0.6	0.3	0.16	-0.52	0.25	-0.02	0.39	0.57	0.12	0.63	0.3	-0.43	0.16	-0.21	-0.6	0.13	0.04	-0.18	0.52	0.43	-0.24	0.24	0.18	-0.61	0.42	-0.39
GENE5690X	IMAGE:1557072	311397 ESTs Hs.292919 AA923153	1	0.1	0.25			0.57	-0.46	-0.03	0.32	0.62	0.13	0.86	0.38	0.92	1.41	0.29	-0.03	0.61	-0.07	-0.53	0.31	-0.04	-0.24	-0.23	-0.14	0.45	0.64	-0.03	-0.28	0.21	0.48	0.27	-0.66	-0.22	-0.53	-0.82		0.52	0.21	-1.26	0.55	0.04	0.51	-0.34	-1.12	0.7	0.62
GENE1703X	IMAGE:132165	109811 Homo sapiens, Similar to RIKEN cDNA 2010012O05 gene, clone MGC:27171 IMAGE:4698381, mRNA, complete cds Hs.34492 R23619	1	-0.02	0.83	0.85	-2.78	1.18	-1.74	0.25	-0.11	-0.26		0.82	1.01	1.32	0.02	0.01	0.1	0.86		0.05	-0.71	-0.77	-0.33	-0.09	-0.24	0.47	0.51	0.02	-0.45	0.45	0.43	-0.61	-1.2	-0.53	-1.3	-1.44	0.21	0.03	0.65	-0.05	0.28	-0.61	0.84	-0.66	-0.51	-1.88	-0.9
GENE568X	IMAGE:810911	103185 SLC34A2 solute carrier family 34 (sodium phosphate), member 2 Hs.105039 AA459296	1	0.11	0.5		-0.33	0.84	-0.41	0.86	2.19	0.16	0.19		0.42	0.68		0.53	-0.78	0.48	0.78	0.24	0.55	0.26	0.07	-0.08	-0.36	0.34	-0.26	0.46	-0.15	0.24	1.27	-0.88	-0.56	-0.9	-0.98	-0.24		0.27			0.27	-0.32	0.07	-0.4	-0.71	-0.86	-0.34
GENE1653X	IMAGE:743452	109509 ESTs Hs.112699 AA609368	1	-0.05		0.58		0.81	-0.25	0.13	0.52	-0.02		-0.2	-0.04	-0.07	-0.2	-0.33	0.54	0.67		0.02	0.49	0.14	0.44	0.17	-0.46	0.23	0.5	-0.54	0.23	0.33	0.67	-1.07	-0.04	-0.09	-0.74	-0.22	0.68	0.04	0.23	-0.83	0.23	-0.05	0.45	-0.13	-0.19	-0.23	-0.8
GENE1327X	IMAGE:269787	107721 L1CAM L1 cell adhesion molecule (hydrocephalus, stenosis of aqueduct of Sylvius 1, MASA (mental retardation, aphasia, shuffling gait and adducted thumbs) syndrome, spastic paraplegia 1) Hs.1757 N27145	1	0.35	0.9	0.85	-1.45	-0.06	-0.37	0.07	-0.36	0.43	2.21	-1.12	0.88	0.21	0.26	-0.08	-0.44	0.75	-1.64	-0.57	0.66	0.55	0.82	0.69	0.43	0.35	0.63	0.23	-0.2	0.06	0.5	-0.33	-0.52	0.1	-0.37	0.1	1.83	0.61	0.39	-1.27	0.33	0.39	0.22	-0.22	-0.19	-0.32	-0.49
GENE28X	IMAGE:289057	100149 HT021 HT021 Hs.47166 N63604	1	-0.93	0.55	-1.55	0.53	-1.09	-0.28	2.06	0.73	1		-0.83	2.25	-0.49	0.93	-0.45	-1.32	0.13	-0.33	0.64	0.31	-1.5	0.88	0.16	-0.2	-0.08	0.12	0.09	-0.23	-0.52	0.26	-0.15	0.07	-0.09	-0.49	-0.98	0.58	0.46	-0.18	0.58	-0.3	0.54	-0.81	0.13	-0.22	0.63	-0.65
GENE1681X	IMAGE:41648	109672 IL13RA2 interleukin 13 receptor, alpha 2 Hs.25954 R52795	1	0.71	-0.05	-0.95	-0.22	-0.99	0.19	-1.5	-1.37	-1.91	-4.56	0.2	2.41	0.46	1.64	-1.07	-1.15	1.03	-0.41	0.38	-1.01	-0.83	0.54	2.04	1.88	1.03	-0.9	-0.02	1.65	0.52	0.49	-1.2	0.08	1.08	-2.1	-0.29	-0.69	-0.85	0.37	0.51	-0.57	0.45	-0.74	-0.17	-0.12	-0.12	-2.41
GENE809X	IMAGE:345626	104659 FABP7 fatty acid binding protein 7, brain Hs.26770 W72051	1	1.18	-2.48	-0.6	-0.44	-1.77	0.01	0.88	-1.73	-1.1		-0.77	1.46	0.97	1.28	-0.52	-0.2	1.26	0.12	1.06	-0.9	0.29	1.31	1.52	1.5	1.26	-0.69	-0.21	1.24	0.58	0.76	-1.02	0.82	-0.68	0.06	-0.89	-0.27	-0.71	0.49	1.24	0.25	-0.36	-0.74	-0.49	0.31	2.84	-1.07
GENE777X	IMAGE:119882	104411 FGG fibrinogen, gamma polypeptide Hs.75431 T94279	1	0.4	-0.59	-0.59	-1.75	-0.84	-0.08	-0.34	-0.65	2.15	-2.07	0.61	0.55	0.85	3.31	-1.25	-1.36	0.54	-3.36	2.28	-0.02	-0.78	0.34	1.33	1.58	1.37	0.08	0.12	0.99	-0.65	0.29	-0.59	-0.36	1.44	-0.79	-1.96	-0.35	-0.66	0.69	0.31	-0.54	-0.01	-0.76	-0.04	0.48	-0.58	2.27
GENE270X	IMAGE:129024	101590 FGL1 fibrinogen-like 1 Hs.107 R10378	1	-1.18	-1.93	-0.95	0.05	-1.57	-0.1	0.15	-1.11	-0.82	-2.55	-0.71	0	0.94	0.95	-0.49	-1.81	0.09	-2.23	1.11	-0.13	-1.28	-0.79	1.58	1.96	0.57	-0.5	-0.32	0.55	-0.3	-0.28	-0.68	-0.14	-0.91	-0.75	-0.3	-0.29	-1.33	1.61	-0.69	-0.43	-0.81	-0.71	-0.48	-0.58	0.46	-0.56
GENE3370X	IMAGE:454771	119433 FGL1 fibrinogen-like 1 Hs.107 AA677287	1	0.64	-1		-1.45	-1.34	-0.04	0.63	-0.43	-0.91	-1.76	-0.8	0.69	0.36	0.91	0.26	-1.66	0.4	-1.18	0.27	-0.38	-0.07	-0.7	1.19	1.29	0.68	-0.15	-0.03	-0.31	-0.61	0	-0.73	-0.28	-0.56	-1.4	-0.55	0.32	0.82		-0.39	-0.53	-0.95	-1.13	-0.96	0.44	-1.75	-0.83
GENE2388X	IMAGE:241788	113743 FGB fibrinogen, B beta polypeptide Hs.7645 H91714	1	0.25	-0.89	-0.2		-0.9	-0.66	0.05	-1.64	0.26	-2.21	0.44	1.36	1.09	1.59	0.57	-0.89	1.12	-1.65	1.91	-1.17	-0.52	0.54	0.98	1.28	1.51	0.2	0.56	0.02	0.38	-0.31	-0.39	-1.45	-0.3	-1.43	-0.43	0.44	0.47	1.41	0.93	-0.37	-0.58	-0.36	-0.74	-0.38	-1.1	1.23
GENE6671X	IMAGE:74537	99914 AFP alpha-fetoprotein Hs.155421 T59043	1	1.01	-2.05	-1	-0.38	-0.95	0.49	0.29	-1.05	-1.11	-4.18	-1.24	2.48	0.99	0.32	-1.3		0.54	-1.05	0.38	1.04	-0.18	0.54	0.69	0.64	1.51	0.48	-0.2	0.98	1.36	0.83	-1.2	0.19	0.47	-1.39	-0.42	-0.33	0.59	0.2	1.86	0.05	0.72	-0.51	-0.42	-0.15	0.18	-0.46
GENE3622X	IMAGE:84713	120929 FGB fibrinogen, B beta polypeptide Hs.7645 T73858	1	-0.08	-0.5	-0.76	-0.32	0.39	-0.03	0.75	0.13	0.36	-0.53	-0.16	0.11	0.06	1.17	0.11	-0.56	0.5	-0.23	0.24	-0.52	0.23	-0.34	0	0.25	0.37	0.51	-0.12	0.45	0.16	-0.12	-0.48	0.06	-0.2	-0.5	0.25	-0.48	0.1	0.41	-0.43	-0.19	0.37	0.5	-0.26	0.1	0.39	0.65
GENE4886X	IMAGE:1030942	226729 PFKFB4 6-phosphofructo-2-kinase/fructose-2,6-biphosphatase 4 Hs.198278 AA620342	1	0.05	-0.26	-1.03	-0.76	-0.07	-0.33	0.49	-0.99	-0.46	0.37	0.16	0.44	0.23	-0.03	-0.59		0.98	-0.8	-0.42	0.04	-0.07	-0.31	0.77	0.51	0.28	0.59	0.78	0.21	0.82	1.36	-0.29	0.12	-0.03	0.5	0.03	-0.42		0.28	-0.09	0.46	-0.69	0.47	-0.91	-0.28	-0.36
GENE919X	IMAGE:322586	105330 ESTs Hs.74832 W15284	1	-0.17	-0.16	0.12	-0.03	0.04	-0.19	-0.58					-0.04	0.02	-0.21	0.27	-1.35	-0.07	-1.74	-0.29	-0.23	0.05	-0.06	0.84	0.28	0.07	0.53	0.37	0.21	0.02	0.14	-0.42	-0.24	-0.05	-0.02	0.1		-0.07	-0.05	-0.02	-0.07	-0.4	-0.01	-0.27	-0.3	-0.2	1.43
GENE5571X	IMAGE:1625388	310421 Homo sapiens, Similar to RIKEN cDNA 4933400E14 gene, clone IMAGE:4871932, mRNA, partial cds Hs.129481 AA994255	1	0.06	-0.13	0.06	-0.49	0.16	-0.3	-0.12	1.61			-0.07	-0.11	0.18	-0.25	-0.02	-0.85	-0.09	-1.36		0.09	0.18	0.7	0.57	0.32	0.17	-0.68	0.8	0.64	0.84	0.7	-0.34	0.38	-0.46	-0.35	-0.28	-0.03	0.05	-0.41	0.16	0.03	-0.43	0.21	-0.5	-0.54	-0.41
GENE6549X	IMAGE:1699118	99182 ESTs Hs.117689 AI003508	1	-0.27	-0.24	-0.43	-0.35	-0.19	1.07	0.96	-0.24	1.39			1.15	0.58		0.7		-0.53	0.21		0.12	0.81	0.45	0.36	-0.22	-0.01	-0.43	0.41	0.67	0.1	0.99	-0.59	-0.74	0.23	0.19	-0.84		-1.05	-0.28	0.07	0.69	-0.51	0.24	-1.44			-0.32
GENE588X	IMAGE:1030769	103287 TSPY testis specific protein, Y-linked Hs.2051 AA608988	1	-0.08			-0.42	0.36	1.67	-0.09	-0.29				-0.01	0.17	0.52	-0.76		0.22			4.4	-0.78	-0.58	0.13	-0.39	0.01	0.14	-0.38	-0.58	0.23	0	-0.37	-0.23	0.11	-0.59	-0.86	0.55	0.04	0.26	-0.13	0.31	-0.74	-0.29	-0.02	-0.18	0.13	0.13
GENE6472X	IMAGE:795378	98764 KIAA1238 KIAA1238 protein Hs.236463 AA453495	1	-0.14				-0.46	1.65		1.62	-0.08	-0.51		-1.42	0.12	-0.86		-3.32	-0.95	1.21	0.04	0.98	0.83	-1.36	1.88	0	-0.71	-0.79	-1.35	-0.63	-1.12	-0.05	-1.66	-0.7	-1.11	-1.83	-0.48	1.83	0.65	-0.5	-0.88	0.29	-0.78	-0.76	-0.87	-0.17	-1.7	-0.86
GENE4548X	IMAGE:267464	224917 KIAA1238 KIAA1238 protein Hs.236463 N25242	1	-0.11	-0.17	0.1	-0.16	0.22	1.27	-0.32	0.86	-1.08	-1.7	-1.56	-1.24	-0.22	-1.31	-0.36	-1.71	-1.39	0.5	-0.38	0.6	0.7	0.22	2.35	-0.47	-0.92	-0.27	0.2	-0.75	-0.78	-1.27	-1.32	-0.76	-1.12	-1.31	-0.32	1.39	0.62	-0.24	-0.34	-0.07	-0.48	-0.01	-0.91	-0.13	-1.58	-0.97
GENE531X	IMAGE:121218	102982 PF4 platelet factor 4 Hs.81564 T97180	1	0.05		-0.02	0.43	0.21	-0.18	0.38	1.12	-0.66	-2.51	-0.39	0.49	0.31	0.01	-0.1	-1.28	0.32	-1.09	0.23	0.73	0.94	-1.07	-0.08	0.57	-0.14	0.09	0.07	0.11	0.09	-0.32	-0.59	-0.2	-0.35	-0.49	-0.64	0.38	-0.02	0.47	0.22	0.16	-0.38	0.03	-0.05	-0.37	-0.36	-1.82
GENE2342X	IMAGE:1324242	113479 TNFSF7 tumor necrosis factor (ligand) superfamily, member 7 Hs.99899 AA769742	1	0.67	-0.29	0.25	-1.43	-0.81	-0.74	0.72	-2.78	-0.06			0.18	0.79	0.39	-0.01	-0.64	1			-0.15	-0.28	-0.55	0.89	1.48		0.87	3.17	0.84	-0.66	-0.89	-0.33	-0.67	-1.31		-0.17		-0.76	0.45	1.87	0.39	-0.53	-0.5	-0.01	0.81		-0.69
GENE5603X	IMAGE:1916687	310604 TNFSF7 tumor necrosis factor (ligand) superfamily, member 7 Hs.99899 AI347622	1	0.71		0.1	-0.72	0.14	-0.85	-0.37	-2.09	-0.48	-0.55	-0.81	-0.81	1.42	-1.27	0	-0.94	0.99	-1.7	-1.55	-0.13	0.41	-0.01	0.46	0.12	-0.11	1.07		0.24	0.05	-0.43	-0.41	-0.59	-0.8	-0.58	0.18	-0.37	-0.43	0.54	1.81	1.07	-0.72	0.09	0.03	0.5	0.06	-0.37
GENE1667X	1049030	109594 TNFSF9 tumor necrosis factor (ligand) superfamily, member 9 Hs.1524 AA778663	1	0.53	0.76	0.48	0.23	-0.03	-0.38	0.01	-0.37	-0.45	-0.22	-0.51	-0.54	-0.34	-0.91	-0.85	0.34	0.89	-0.41	-0.12	0.47	0.41	0.52	0.44	-0.44		2.39	1.48	0.06	-0.05	0.14	0.3	0.5	-0.01	0				1.15	0.43	0.88	-0.97	0.3	-0.13	0.28	-0.4	-0.18
GENE5153X	IMAGE:1901754	307656 ESDN endothelial and smooth muscle cell-derived neuropilin-like protein Hs.173374 AI302412	1	-0.25	-0.45	0.11	-0.15	0.2	-0.56	-1.38	0.21	-0.07	0.26	0.66	0.83	0.23	-0.48	0.63	-0.4	-0.07	-0.88	-0.21	1.23	1.32	1.68	-0.27	-0.75	-0.27	-0.07	-0.52	-0.06	-0.67	-0.66	-0.01	-0.22	0.26	1.16	0.98	3.44	-0.89	2.8	-0.31	0.09	0.28	0.53	0.46	0.42	0.65	0.95
GENE6422X	IMAGE:838736	98455 ESDN endothelial and smooth muscle cell-derived neuropilin-like protein Hs.173374 AA457544	1	-0.14		-1.24	0.41	-0.71	-0.49	0.43	0.24	-0.53			0.47	0.55	0.63			-0.16		0.06	0.56	0.49	0.42	0.07	0.09	-0.34	-0.54	-0.68	-0.03	-0.49	0.46	-0.07	-0.53	-0.15	0.64	-0.06	3.26	-0.37	2.4	-0.53	0.68	-0.5	-1	1.19	1.02	0.69	0.46
GENE2768X	IMAGE:782460	115972 ESDN endothelial and smooth muscle cell-derived neuropilin-like protein Hs.173374 AA431438	1	-0.45	-0.35	-0.42	0.01	-1	-0.05	-0.82	0.81	-0.1	1.06	1.39	-0.1	0.87	0.39	-0.6	-2.39	0.28	0	0.22	0.22	0.01		-0.32	0.17	0.06	0.55	-0.68	-0.2	0.02	-0.24	-0.74	-1.57	-0.12	0.94	0.39	3.65	-0.02	3.91	-0.67	-0.06	-1.43	-1.36	0.27	0.29	0.26	0.63
GENE4299X	IMAGE:281892	223483 NT5 5' nucleotidase (CD73) Hs.153952 N51851	1	-0.51	-0.22			0.76	-0.7	0.13	-0.42	0.36	0.35		-0.77	-0.2	-1.03	-1.93					-0.44	-0.27	0.11		-1.02	-0.08	1.56	0.48	1.07	1.52	1.4	-0.81	-0.56	-1.16	-0.04	0.43	1.66	2.28	2.11	-0.59	0.78	0.11	0.38	0.71	0.14	-1.27	1.31
GENE5556X	IMAGE:271978	310325 NT5 5' nucleotidase (CD73) Hs.153952 N35316	1	-0.41	0.12	-0.97	-0.13	0.91	-1.35	0.74	0.83	0.46	0.17	0.9	0.16	-1.06	-0.88	-2.39	-1.44	1.28		0.33	-0.64	-0.49	0.09	0.14	-0.47	-0.26	2.15	0.23	1.15	2.04	2.05		-0.23	-1.24	2.2	-0.7	2.34	2.59	2.57	-0.67	0.34	-0.22	1	1.81	1.05	-2.16	2.79
GENE2807X	IMAGE:42070	116156 NT5 5' nucleotidase (CD73) Hs.153952 R60343	1	-0.06	0.22	-0.8	-0.26	0.98	-1.16	0.71	1.1	0.42	0.22	1.1	0.08	-0.84	-1.1	-1.7	-1.3	1.31	0.01	0.18	-0.84	-0.44	0.13	0.22	-0.6	-0.17	1.6	0.28	1.59	1.86	1.96	-1.31	-0.37	-0.99	1.73	-0.75	2.41	2.68	2.27	-0.74	0.42	-0.26	0.89	1.75	0.97	-1.93	2.35
GENE2499X	IMAGE:433155	114374 F5 coagulation factor V (proaccelerin, labile factor) Hs.30054 AA680136	1				1.85	-0.89	-1.04	0.79	3.02	2.19	-1.96	0.29	1.9	-0.5	-1.82		-2.05	-0.22			-0.96	-1.23	-0.28		-0.65		-1	-0.73		0.68	1.54	-0.38	-0.44	-0.48	-1.76		0.46		-0.72	-1.11	0.37	0.62	2.73	3.55	2.96	-0.72	1.84
GENE160X	IMAGE:951102	100927 EST Hs.112863 AA620463	1	-0.24	0.04	0.65	0.59	-0.23	-0.8	-0.51	-1.4	-1.06	-1.25		-0.92	-0.72	-1.02	-0.72	-2.01	0.67	0.24	0.1	-1.15	-0.5	0.09	0.26	-0.15	0.57	0.08	0.33	0.45	0.49	0.95	0.09	-0.15	-0.12	-0.11	0.02	0.35		-0.86	0.12	-0.04	-0.38	0.47	4.72	4.33	-0.73	0.21
GENE4564X	IMAGE:745103	224990 PTD002 PTD002 protein Hs.41767 AA626365	1	0.13	0.14	0.88	-0.03	-0.31	0.6	0.39	0.5	0.61			0.3	0.77	0.35	-0.07			-0.57	0.31	0.1	-0.29	-0.4	-0.5	-0.1	-0.14	-0.76	-0.22	0.05	-0.01	-0.17	0.38	0.04	0.17	1.01	0.19	-0.28	-0.01	0.04	0.53	-0.47	-0.34	-0.28	5.88	6.47	0.38	0.61
GENE5242X	IMAGE:358227	308234 SPTBN5 spectrin, beta, non-erythrocytic 5 Hs.136506 W95287	1		0.21	-0.19			-0.23	-0.71	1.78	0.2		-0.57	-0.31	-0.18	-0.16	-0.37	-1.12	0.99		0.47	-0.51	-0.23	-0.4	-0.85	0.01	-0.06	0.2	-0.12	-0.15	-0.4	0.16	0.2	-0.11	0.3	1.58		1.73	0.79	-0.42	-0.29	0.18	0.06	-0.44	2.41	1.86	-0.19	0.07
GENE3905X	IMAGE:1469402	221195 ESTs Hs.122156 AA863480	1	-0.51	-0.11	-0.45	-0.07	-0.04	0.16	-0.06	-0.64	1.05	-0.84	0.19	0.22	0.61	-0.1	-0.25	-0.5	-0.08			0.08	-0.69	0.07	-0.38	0.05	-0.83	-0.42	-0.32	0.52	0.87	1.02	-0.07	-0.15	2.6	-0.06	-0.34	0.4	0.61	-0.24	-0.01	0.14	-0.6	0.77	1.57	0.27	-0.09	0.32
GENE6406X	IMAGE:33645	98371 ESTs Hs.351142 R44007	1	-0.33	0.6	-0.33	-0.38	-0.38	0.37	0.01	-0.59	1.29		1.01	0.23	0.01	-0.12	0.24		-0.24	0.07	-0.75	0.03				-0.68	-1.13	0	-1.58	1	0.46	1.28	-0.12	-0.32	1.9	0.14	-0.16		0.88	-0.39	-0.1	-0.31	-0.32	1.39	2.28	0.7	-0.48	0.23
GENE2331X	IMAGE:276515	113397 SLC1A7 solute carrier family 1 (glutamate transporter), member 7 Hs.104637 N39099	1	-0.27		-0.16	0.57	-0.88	-0.15	0.07	-0.46	-0.21	-1.29		1.37	-0.35	0.19	-0.09		-0.33	-0.34	0.01	0.89	-0.17	0.33		-0.18	-0.41	-0.68	-0.65	-0.52	0.02	0.21	-0.54	-0.13	1.43	-0.8	-0.57		0.19	-0.19	0.57	-0.28	-0.03	0.88	1.64	1.51	-0.38
GENE2802X	IMAGE:898387	116140 ESTs, Moderately similar to ALU1_HUMAN ALU SUBFAMILY J SEQUENCE CONTAMINATION WARNING ENTRY [H.sapiens] Hs.165372 AA598924	1	0.45	-0.2	4.32	-0.34	-0.56	0.37	-0.49			0.13		-0.5	-0.23	0.2	0.12	-0.39	-0.42	-0.27		-0.04	0.49	0.89		-0.24	0.24	-0.45	-0.24	0.26	-0.75	-0.5	-1.13	0.12	-0.14	-1.2	-0.7		0.18	-0.74	-0.8	-0.03	-0.26	0.27	0.48	-0.06	-0.95	0.9
GENE1788X	IMAGE:813639	110293 PER3 period homolog 3 (Drosophila) Hs.12592 AA447743	1	-0.05	-1.1			-0.06	0.35	0.65				-1.96	-0.29	-0.06	0.52			0.14	-1	-0.25	0.11	-0.27	-0.44	0.07	-0.58	-0.15	0.01	0.04	-0.17	-0.21	0.47	0.46	0.07	-0.1	-0.32	0.37		0.46	-0.18	-0.25	-0.28	0.2	0.4	-0.15	-0.46	-0.52	-2.19
GENE5294X	IMAGE:1737724	308546 LRRN1 leucine-rich repeat protein, neuronal 1 Hs.125742 AI125840	1	-0.64	-0.27	0.35	-0.51	0.08	-0.28	-0.81	0.16	-0.07	-0.06	-0.4	-0.35	-0.17	-0.38	-0.82	-0.55	-0.47		-0.27	-0.37	-0.19	-0.68		-0.58	0.03	2.87	-0.77	-0.7	0.15	0.42	-1.15	-0.38	-0.39	2.82	-0.38		0.67	-0.38	0.26	-0.61	-0.22	0.26	-0.67	0.18	-0.62	-0.76
GENE3569X	IMAGE:742763	120605 KIAA0290 KIAA0290 protein Hs.96485 AA400186	1	-0.41	0.48	0.59	-0.82	-0.33	0.52	-0.84	-0.98	-1.25	0.57	0.26	-0.74	0.12	-0.58	-0.57	-1.05	0.09	1.11	0.47	0.07	1.14	0.41	0.11	-1.06	-0.36	0.62	1.07	0.27	0.48	0.43	0.58	-0.06	0.29	1.69	0.2	0.61	0.54	0.98	-0.14	0.04	-0.33	0.66	-0.04	-0.13	-0.07	0.39
GENE2815X	IMAGE:436741	116189 KIAA0443 KIAA0443 gene product Hs.113082 AA702949	1	0.5	-0.02	0.68	-0.39	0.23	-0.6	-0.85	-1.75	-0.64	-0.35	0.14	0.26	0.18	-1.2	-0.6	0.77	1.09	-0.15	0.34	-0.01	0.31	0.96	1.02	-0.2	-0.16	1.66	0.67	0.57	0.09	-0.11	0.49	0.75	-0.38	0.81	-0.1	-0.12	-0.12	1.41	-0.45	-0.51	-0.57	0.95	-1.13	-0.35	-0.29	0.03
GENE4215X	IMAGE:179266	222978 ESTs, Highly similar to CTXN RAT CORTEXIN [R.norvegicus] Hs.250879 H50240	1	-0.43	-0.26	-0.69	-0.93	-0.67	-0.52	0.47	-0.01	-0.07	-0.66	0.41	1	0.5	0.09	-1.55	1.47	0.07	-0.64	0.17	0.06	0.41	0.01	1.21	1.12	0.19	0.53	0.56	0.95	0.22	0.8	0.35	0.12	-0.62	2.11	0.89	1.04	0.98	1.1		-0.01	-1.15	-0.36	-0.54	-0.33	-0.56	-1.47
GENE6681X	IMAGE:752903	99953 KIAA0303 KIAA0303 protein Hs.54985 AA481435	1	-0.14	0.02	-0.56	-1.14	-0.14	-0.05	-0.16	0.82		0.02		-0.61		-0.48	0.31	0.33	-0.09	0.71	-1.05	-0.83	0.56	-0.28				-0.49		-0.74	-0.68	-1.3	-0.66	-0.42	-0.36	1.87	0.09	-0.08	1.08	0.03	-0.58	0.21	-0.66	0	-0.37	-0.21	-0.54	-1.39
GENE2228X	IMAGE:343174	112878 Homo sapiens cDNA FLJ31204 fis, clone KIDNE2003305, weakly similar to PUTATIVE AMIDASE AF1954 (EC 3.5.1.4) Hs.57876 W67536	1	-0.12	0.22	0.04	-0.2	-0.22	1.12	0.12	1.87		-2.74		-0.12	-0.31	0.07	0.18		0.13	-0.16		-0.14	0.76		-0.2	0.02	1.07	-0.34	-0.27	-0.45	-0.52	0.25	1.66	0.25	-0.5	0.53	0.11		-0.27	0.25	0.51	-0.5	-0.72	-0.74	0.17	0.24		-0.48
GENE413X	IMAGE:194451	102422 LRP5 low density lipoprotein receptor-related protein 5 Hs.6347 R83038	1	-0.47	-0.5	-0.24	-0.52	-0.66	-0.25	0.93	1.28	1.4	-0.42	1.36	0.74	0.19	-0.1	0.41	1	0.5	0.36	0.2	0.4	0	-0.26	0.39		-0.3	-0.12	-0.04	-0.32	0.21	-0.52	0.2	-0.21	0.07	0.19	-0.2	0.04	0.22	0.05	-0.59	0	0.01	0.41	0.63	0.08	-0.24	0.99
GENE4968X	IMAGE:113856	228984 CCND1 cyclin D1 (PRAD1: parathyroid adenomatosis 1) Hs.82932 T77237	1	0.53	-0.36	-0.36	-1.78	-0.94	0.86	-0.72	0.79	1.1	0.33	0.68	-0.02	-1.12	0.19	-0.15	0.36	0.51	1.2	-0.05	-1.19	-0.68	-0.14		-0.05	-0.91	0.93	0.3	-1.32	0.44	1.22	-0.45	-0.23	-1.64	1.08	0.17	0.95	1.4	0.31	0.27	0.32	-0.72	-0.46	0.24	0.23	-1.32	0.29
GENE758X	IMAGE:841641	104326 CCND1 cyclin D1 (PRAD1: parathyroid adenomatosis 1) Hs.82932 AA487486	1	0.25	-0.17	-0.08	-1.63	-0.48	0.12	-1.3	0.51	0.9	0.21	0.16	-0.26	-1.09	-0.3	0.07	0.64	0.15	1.03	-0.51	-0.4	0.16	0.05	0.03	0.36	-0.81	0.91	0.25	0.2	0.33	0.46	-0.06	0.04	-0.85	0.64	0.39	0.17	1.24	0.3	0.24	0.04	-0.12	0	0.41	0.01	-0.64	0.3
GENE1512X	IMAGE:742679	108758 FLJ10261 hypothetical protein FLJ10261 Hs.26176 AA400086	1	-0.06	-0.35	-1.08	0.81	0.45	-0.87	1.19	-0.18	-0.52	-0.72		-1.39	-1.59	-0.79	-1.51		-0.13	1.33	-1.25	0.26	0.25	-0.83	-1.26	0.4	0.27	-0.05	1.08	-1.21	-0.94	-1.06	-0.81	-1.4	-0.84	-0.29	0.35	1.73	1.57	0.66	1.03	0.9	0.63	-0.15	1.22	0.13	-0.85	-0.38
GENE4753X	IMAGE:280950	226038 SRI sorcin Hs.300741 N50843	1	-0.24	0.21	0.03	0.08	0.42	2.28	0.57	0.18		0.13		-0.4	-0.44	-0.68	-0.83	-1.06		-0.33	-1.23	-0.88	0.23	-0.06		0.02	0.16	-0.37	-0.7		-0.19	-0.19	0.12	0.25	-0.17	1.01	0.7	0.53	-0.07	0.02	0.37	-0.11	0.57	-1.06	0.56	-1.13	-0.25	-1.1
GENE1265X	IMAGE:205303	107405 SRI sorcin Hs.300741 H60859	1	0.15	0.02	-0.33	0.35	0.6	2.24	0.62	1	-0.22	0.41	0.01	0.25	-0.15	0.16	-0.56	0.44	0.6	-0.09	-0.29	0.14	-0.59	-0.54	-0.29	0.34	0.74	-0.5	0.13	0.56	-0.3	-0.47	-0.44	0.18	-0.26	0.41	0.27	0.67		-0.78	-0.17	0.61	-0.15	0.14	0.21	-0.73	-0.37	-0.55
GENE3532X	IMAGE:139681	120427 NNAT neuronatin Hs.117546 R63918	1	-0.03		-0.26	-0.04	0.15	-0.2	-0.05	-0.86	-0.57	-0.84		0.2	-0.19	0.31	0.12	-0.27	0.09		-0.21	0.47	0.06	0.07		-0.34	-0.07		-0.09		-0.36	0.1	-0.33	-0.32	-0.22	-0.23	0.12	-0.13	-0.13	0.18	0.56	-0.14	0.2	-0.01	-0.33		-0.42	-0.11
GENE5070X	IMAGE:1635359	307161 RASD1 RAS, dexamethasone-induced 1 Hs.25829 AI014398	1	0.23	0.14	-0.15	0.35	0.19	0.85	-0.62	-0.22	0.01	-0.18	0.07	0.07	-0.09	-0.38	-0.12	0.13	-0.55	-0.61	-0.03	0.67	-0.07	-0.07	-0.38	-0.93	0.17	0.01		0.05	0.03	-0.54	0.21	0.43	0.91	-0.14	-0.35	-0.18	-0.08	-0.07	-0.88	0.36	-0.15	0.47	0	0.29	0.09	-0.14
GENE4885X	IMAGE:290261	226728 FLJ10687 hypothetical protein FLJ10687 Hs.29379 N64405	1	0.08	0.37	0.25	0.72	-0.16	0.59	-0.56	1.32	0.21	0.84	-0.35	-0.6	0.49	0.54	0.04	0.61	0.43		0.33	-0.13	0.49	-0.45	-0.51	-0.04	-0.49	-0.11	0.19	0.19	0.25	0.53	0.04	-0.12	1.83	-0.1	-0.12	-0.21	-0.01	-0.39	-0.41	-0.82	-0.21	0.03	-0.38	-0.79	-0.85	-0.06
GENE5992X	IMAGE:1706356	315278 APMCF1 APMCF1 protein Hs.12152 AI160339	1	0.01	-0.09	-0.08	0.05	0.63	0.05	0.32	1.31	1.49	0.17	-0.55	-0.12	0.18	0.18	-0.31	1.26	-0.24	1.39	0.08	0.07	1.11	0.37		-0.01		0.03	0.03	0.14	0.12	0.67	0.37	0.3	0.67	0.21	-0.04	0.04	-0.05		0.69	-0.25	-0.95	-0.44	-0.26	0.33	-1.6	0.96
GENE5510X	IMAGE:377384	310010 NR2F2 **nuclear receptor subfamily 2, group F, member 2 Hs.347991 AA055076	1	-0.69	-0.07	-0.18	0.89	-0.01	0.95	-1.37	1.47	-0.27	0.13	-0.21	-1.18	-0.57	0.04	0.23	0.3	0.04	0.87	-0.22	0.28	1.2	-0.37	-0.76	-0.67	-0.63	0.41	-0.04	-0.53	-0.44	-0.18	-0.27	-0.04	-1.02	-0.22	-0.29	-0.68	-0.21	-0.98	0.54	-0.15	-0.12	-0.49	-0.16	0.08	-0.44	0.63
GENE1769X	IMAGE:767313	110201 Homo sapiens cDNA: FLJ22189 fis, clone HRC01043 Hs.288869 AA418510	1	-0.35	0.04	-0.12	0.46	-0.22	1.05	-0.89	0.88		-0.42		-0.95	-0.45	-0.33	0.02	0.03	-0.2	0.65	-0.61	0.37	1.24	-1.07	-0.57	-0.46	-0.65	0.2	0.34	-0.9	-0.33	-0.57	-0.46	-0.38	-1.31	-0.32	-0.52		-0.47	-1.34	0.25	-0.28	-0.53	-0.69	-0.32	-0.46		0.01
GENE4011X	IMAGE:825813	221890 ESTs Hs.12420 AA505136	1	-0.59	0.22	0.17	-0.06	1.11	0.98	-0.13	2.25		-0.21	-0.38	-0.01	-0.76	-0.33	-0.48	-0.6	-0.16	0.05	-0.34	-0.74	0.31	-0.97	-0.42	0.52	0.44	-0.58	-0.14	0.05	-0.84	-0.27	-0.13	0.51	-0.49	-0.21	-0.1	-1.56	-0.66	0.32	0.35	0.19	-0.74	-0.47	-0.74	-0.55	-0.42	-0.3
GENE497X	IMAGE:812053	102795 Homo sapiens cDNA FLJ13585 fis, clone PLACE1009150 Hs.43047 AA455980	1	-0.21	0.43	0.57	-0.48	-0.19	0.95	-1.03	1.91	-0.81		-0.63	-1.08	-0.44	0.17	0.46		0.62	1.56	-0.68	0.11	0.09	0.61	0.48	-0.67	-0.53	-0.18	-0.93		-1.15	-1.13	2.26	0.44	-0.17	-2.46	0.27		-0.69	-0.57	-0.1	-0.52	-0.92	-0.55	-1.13	-0.99		0.28
GENE5542X	IMAGE:1492652	310197 RPE ribulose-5-phosphate-3-epimerase Hs.125845 AA878541	1	-0.91		-0.11	-0.46	0.35	0.74	0.92	1.79	-0.94	-0.07	0.07	1.21	-0.28	0.46	0.96		-0.39	0.92	-0.14	-0.13	0.72	-0.34	-0.84	-0.41	-0.22		-0.21	-0.49	-0.17	0.45	0.03	0.29	-0.19	-0.75	-0.28	-0.29	0.63	-0.5	-0.27	1.06	0.16	-0.45	-0.05	-0.35	-0.62	0.01
GENE3182X	IMAGE:324659	118239 Homo sapiens cDNA FLJ11561 fis, clone HEMBA1003142 Hs.55982 AA284279	1	-0.2		0.38	0.22	-0.29	-0.06		-0.42	-0.14	0.02		0.63	-0.31	0.16	0.82	-0.45	0.04	0.36		0.43	0.55	-0.09		-0.22	0.17	0.32	0.31	-0.02	-0.15	0.43	0.16	0.21	-0.13	0.21	-0.13		-0.03	-0.23	0.4	-0.51	0.4	-0.2	0.25	0.15	-0.77	0.03
GENE2417X	IMAGE:1700839	113890 ITM3 **integral membrane protein 3 Hs.111577 AI049733	1	1.06		-0.6	0.15	-1.24	-0.98	-0.98	-1.43	1.39	0.04	0.8	0.09	-0.07	-1.23	-0.16	-0.12	0.26	-0.08	-0.23	1.11	0	-1.24	-0.55	-0.31	-0.17	0.77	-0.01	-0.16	-0.64	-1.13	-0.16	-0.33	-1.39	-0.85	-0.21	-0.48	0.06	-1.03	0.01	0.16	1.26	-0.75	-0.11	-0.09	-0.4	-0.26
GENE1220X	IMAGE:471196	107168 ITM3 integral membrane protein 3 Hs.111577 AA034213	1	0.68	-1.23	-0.82	0.22	-0.95	-1.04	-0.39	-1.42	1.1	0.11	0.88	0.35	0.05	-0.89	-0.46	-0.24	0.22	0.39	-0.17	1.07	-0.34	-1.3	-0.23	0.07	-0.06	0.5	0.27	-0.3	-0.74	-0.7	-0.43	-0.6	-1.32	-1.62	-0.36	-0.2	0.29	-0.7	0.47	0.26	0.27	-1.29	-0.38	-0.43	-0.5	-0.54
GENE2498X	IMAGE:52021	114369 DACH dachshund homolog (Drosophila) Hs.63931 H22566	1	0.06		0.41	-0.46	-0.36	-0.26	-0.66	-0.76	0.9	-0.37	0.39	0.31	1.51	1.64	0.79		0.1	-0.33	-0.35	-0.51	-0.59	-0.42	-0.49	-0.11	-0.25	0.81	0.11	0.1	-0.29	-0.69	-0.58	-0.45	1.2	-0.24	-0.32	-0.39	-0.35	-0.05	-0.24	-0.38	-0.13	-0.15	-0.12	-0.76	-0.94	-1.06
GENE3910X	IMAGE:452708	221233 FLJ21934 hypothetical protein FLJ21934 Hs.122583 AA779251	1			-0.07	-1.23	-0.42	-0.85	-2.25			-1.89	1.23	-0.59	0.81	-0.19	-0.92		-0.92	2.17	0.3	0.01	-0.46	-0.18	-0.23	1.6	0.14	-0.7	-1.07	0.63			-1.47	0.25	-1.35	-2.96	-2.15		-0.77	-0.43	-0.94		1	-0.46	-0.39	-2.16	-2.31	-0.23
GENE4810X	IMAGE:1636606	226295 UGT2B7 UDP glycosyltransferase 2 family, polypeptide B7 Hs.10319 AI000188	1	-0.52			-0.96	-0.84	-0.28	-0.03		-0.27		2.96		0.59	0.17	-1.31		0.2	0.61	0.16	0.29		-1.36			0.39	-0.48	-0.33	0.02	-0.91	-0.84	-0.46	0	-0.83	-1.17	-1.12	-0.56	-0.73	0.51	-0.01	-0.31	-0.22	-0.3		-1.43	-2.1	-0.42
GENE149X	IMAGE:1591643	100864 UGT2B7 UDP glycosyltransferase 2 family, polypeptide B7 Hs.10319 AA962194	1	0.21		-0.07	-0.97	-0.93	-0.36	-1.05	0.64	0.5	-2.26	2.64	-0.8	0.54	0.61	-0.3	-1.23	0.23	0.71		0.38	-0.92	-0.23	-0.18	0.68	0.59	0.19	-0.24	-0.12	-0.48	-0.43	-1.06	-0.1	-1.67	-2.36	-1.83	-0.39	-0.14	0.22	-0.13	-1.17	0.06	-0.48	-0.77	-1.6		0.23
GENE992X	IMAGE:1324438	105739 UGT2B7 UDP glycosyltransferase 2 family, polypeptide B7 Hs.10319 AA746229	1	-0.56			-0.93	-0.94	0.46	-0.42	1.11			3.1	-0.15	0.15	-0.68			-1.33	1.35		-0.65	0.11	-1.11	-0.01	0.9	0.24	-1.48	-1.29	0.73	-1.3	-1.22	-0.02	0.38	-0.91	-2.6	-1.38	-2.19	-1.21		0.67	-1.47	-0.59	-0.49	-0.77	-1.54	-1.65	0.34
GENE2091X	IMAGE:246430	112087 UGT2B4 UDP glycosyltransferase 2 family, polypeptide B4 Hs.89691 N53031	1	-0.49	-0.1	0.29	-0.42	-0.35	0.15	-1.09	0.97	0.16	-1.18	4.65	-0.72	0.49	0.2	-0.55	-0.27	-1.33	0.4	0.57	-0.02	-0.44	-0.03	-0.63	0.53	0.21	-0.44	0.27	-0.3	-0.61	-1.02	-0.48	0.28	-0.7	-1.24	-1.22	-0.34	-0.97	-0.12	-0.42	-0.38	-0.21	-0.28	-0.17	-1.15	-0.73	0.02
GENE3165X	IMAGE:78294	118120 UGT2B15 UDP glycosyltransferase 2 family, polypeptide B15 Hs.150207 T50788	1	-0.61	-0.1	-0.09	-0.31	0.01	0.31	-0.62	0.15	-0.24		0.37	-1.02	0.01	-0.22	-0.71		-0.3	2.47	0.12	-0.38	0.04	-0.12		-0.3	-0.2	-0.44	-0.49	0.1	-0.47	-0.46	-0.15	-0.2	-0.21	-0.9	-1.24	-0.67	-0.54	0.01	-0.49	-0.6	-0.76	-0.34	-0.76	-0.86	-0.89	-0.29
GENE3135X	IMAGE:433567	117954 GNLY granulysin Hs.105806 AA701652	1	0.12	0.17	0.06		0.77	-0.3	-1.45		2.97		1.25	-0.38	-0.16	-1.29	-0.44		0.35		-1.97	-0.77	0.74	-1.43	0.7	-0.7	-0.56	1.52	-0.34	-0.26	-0.76	-0.65	1.25	2.35	-1.08	-0.6	-0.61	-0.73	-0.84	-0.66	1.21	-1.03	-0.88	-0.8	-1.35	1.02	1.25	-0.92
GENE4601X	IMAGE:1472585	225292 ATF5 activating transcription factor 5 Hs.9754 AA872311	1	-0.01	-0.24	-0.37	-0.49	0.63	0.24	-0.51	0.59	0.64	-0.14		0.22	0.13	0.63	0.67	0.76	0.25	-0.29	-0.37	-0.35	-0.12	-0.16	0.29	-0.08	0.26	1.03	0.87	-0.3	-0.04	-0.29	-0.03	0.25	-0.9	0.55	-0.39	-0.39	-0.34	-0.06	-0.22	-0.44	-0.65	-0.56	-0.5	-0.29	1.55	-0.43
GENE5886X	IMAGE:1926032	313872 RPS19 ribosomal protein S19 Hs.298262 AI346528	1	0.65	-0.08	0.46	-0.42	0.58	0.39	-0.79	-0.62	0.31	0.57	-1.59	-0.64	-0.6	-0.02	-0.18	0.49	0.55		-0.75	-0.08	0.42	0.28	-0.16	0.33	-0.04	0.28	-0.2	0.25	0.05	0.41	-0.44	-0.19	-0.39	0.51	-0.35		0.07	0	0.19	-0.64	-0.78	-0.23	0.04	-0.57	1.12	0.97
GENE320X	IMAGE:838732	101877 LOC51596 divalent cation tolerant protein CUTA Hs.107187 AA457543	1	0.77	-0.22	0.22	-0.78	0.22	-0.24	-1.15	-0.21	-0.75	0.16	-0.96	-1.34	-1.1	-0.85	-0.14	0.46	0.08	0.67	-0.51	-0.57	-0.07	-0.17	-0.55	-0.2	0.41	0.81	0.32	0.56	0.34	0.3	0.43	-0.17	-0.66	0.86	0.31	-0.21	-0.17	0.37	-0.32	-0.06	-0.95	-0.79	-0.62	-0.19	0.52	0.18
GENE1872X	IMAGE:743323	110825 ESTs Hs.42344 AA400596	1	-0.59	-0.08	0.19	-0.94		-0.17	-0.34	-0.65		-1.41	0.32	-0.26	-0.58	-0.19	0.72	0.28	-0.69	0.07	-0.03	-0.14	-0.65	0.79	0.25	-0.14	0.48	0.64		0.33	0.46	-0.19	0.14	0.59	-0.21	0.64	0.22	0.17	0.55	1.28	-0.35	-0.02	-0.48	0.45	-0.38	-0.44	0.72	0.57
GENE6441X	IMAGE:588609	98563 ARHGEF9 Cdc42 guanine nucleotide exchange factor (GEF) 9 Hs.54697 AA147072	1	-0.08	0.03	-0.08	-0.55	0.07	-0.03	-0.22	-0.69	-0.28		-0.04	-0.53	-0.12	0.24	0.29	0.17	-0.62	0.3	0.17		0.48	0.46		-0.05	-0.33	-0.21	0.1	0.04	-0.23	-0.42	0.55	0.24	-0.11	-0.24	-0.11	-0.32	-0.18	-0.38	-0.88	-0.24	0.34	-0.7	-0.17	0.4	0.87	0.7
GENE920X	IMAGE:589967	105336 EZFIT endothelial zinc finger protein induced by tumor necrosis factor alpha Hs.301431 AA147769	1	0.44	-0.11	0.22		-0.15	-0.16	0.19				0.23	-0.09	-1.01	-1.47	-0.45		-0.5		0.19	0.04	-0.16	0.78	-0.05	0.18	-0.14	-0.16	-0.57	-0.19	0.33	0.12	0.08	-0.14	-0.46	1.71	-0.31	0.15	-0.68	0.04		0	0.03	0.03		-0.59	1.87	-0.21
GENE1708X	IMAGE:249688	109843 CCND2 cyclin D2 Hs.75586 H84153	1	0.39	0.44	0.98	0.01	0.74	-0.86	-0.91	-1.01	0.1	0.49	-0.48	-0.77	-1.2	-0.91	-0.47	0.06	-0.45	-0.78	-0.58	0.2	0.5	0.64	0.03	0.4	1.47	0.25	1.3	1	1.38	0.84	-0.06	0.01	-1.47	-0.72	0.16	0.31	0.14	-0.11	1.38	0.45	0.54	0.67	-0.64	-0.18	0.99	-1.11
GENE4859X	IMAGE:26164	226554 ESTs Hs.44243 R12712	1	0.11	0.59	0.04	0.08	1.17	0.52	0.25	0.26	-2.02	0.07	-0.13	0.1	-0.58	0.07	0.57	0.2	-0.81	-0.38		0.29	-0.33			-0.37		0.18	0.37		0.24	0.92	-0.12	-0.78	0.63	0.76	-0.05			0.51	0.11	-0.57	0.34	0.52	-0.4	-0.14	0.21	-0.47
GENE1345X	IMAGE:76005	107798 ESTs Hs.8610 AI821037	1	-0.38	-0.32	0.11		0.21	-0.67	-0.68	1.71	-0.06	-0.01		0.15	-0.27	-0.22	-0.05		0		0	0.17	-0.32	0.15	0.25	0.45	-0.1	2.15	-1.06	0.06	-0.19	0.11	-0.43	-0.35	-0.14	-0.16	-0.78		-0.25	-0.34	-0.63	-0.07	-0.15	-0.19	-0.27	-0.34		-0.2
GENE2512X	IMAGE:609052	114457 ESTs Hs.269261 AA176607	1	0.01				0.2	0.26	-0.02	-0.03	-2.11	-0.62	0.03	0.47		0.25	-0.19		0.23		-0.09	-0.11	0.04	-0.17	-0.24	-0.21	-0.04	0.01	-0.11	0.12	0.15	0.22	0.13	-0.46	-0.51	0.31	0.07	-0.17	-0.22	0.01	0.11	-0.15	-0.53	0	-0.35	-0.31	0.93	-0.12
GENE1501X	IMAGE:85624	108664 C4BPA complement component 4 binding protein, alpha Hs.1012 T62036	1	-0.29	-0.47	-0.19	-0.52	-0.99	-0.22	-0.65	2.58	-1.01	-0.46		-0.02	0.02	0.19	-0.09	-1.21	-0.01	0.57	0.23	0.32	4.17	-0.08	0.19	-0.14	0.08	-0.4	-0.52	-0.34	-0.33	-0.31	0.85	-0.01	-0.62	-1.4	-0.47	-0.32	-0.49	-0.18	0.21	-0.48	0.66	-0.54	-0.33	-0.28	-0.65	-0.83
GENE1255X	IMAGE:120138	107349 JDP1 J domain containing protein 1 Hs.260720 T95267	1	0.06		-0.05	0.44	-1.18	0.15	-0.48	3.72	-0.35			1.4	-0.17	1.69	1.94		0.28	1.16	0.61	-0.8	2.72	-0.04	0.2	0.51	0.37	-0.55	-0.27	-0.25	0.18	0.38	-1.35	-0.5	-0.67	-1.69	-0.71	-0.49	-0.2	0.21	0.57	-0.47	-0.15	-1.18	-0.61	0.23	-0.43	0.08
GENE6646X	IMAGE:125709	99756 CBX5 chromobox homolog 5 (HP1 alpha homolog, Drosophila) Hs.89232 R07606	1	0.1	0.02	-0.01	0.34	-0.16	0.54	-0.88	0.61	-1.37	-0.52		0.94	0.88	-0.29	-0.04	-0.43	-0.53	0.17		0.28	0.12	0.5	0.35	0.51	0.07	-0.14	0.04	0.98	0.08	0.29	0.86	-0.27	-0.13	0.17	0.33	-0.14	0.79	0.12	0.27	-0.38	-0.11	-0.23	0.04	-0.34	0.62	0.29
GENE1154X	IMAGE:282047	106694 CBX5 chromobox homolog 5 (HP1 alpha homolog, Drosophila) Hs.89232 N48252	1	-0.01		-0.75	-0.67	0.07	1.29		-0.22	-2.09	-0.68		0.13	0.83	-0.03		0.21	-1.15			0.22	-0.07	-0.08	0.02	-0.17	-0.05	-1.32	-0.83	0	-0.48	0.05	1.26	0.06	-0.17	0.5	0	0.84	0.87	-0.87	0.8	-0.13	0.25	-0.34	0.44	-0.02	0.71	-0.64
GENE5997X	IMAGE:773353	315422 CBX5 **chromobox homolog 5 (HP1 alpha homolog, Drosophila) Hs.89232 AA425658	1	0.1	0.08	-0.17	-0.94	0.05	0.57	0.43			0.83		1.07	0.48	0.72			0.04			0.59	0.03	-1.13	0.45	-0.22		-0.81	-0.31	-0.26	-0.74	0.49	0.48	0.01	-0.71	0.18	-0.11	0.44	1.13		0.21	-0.38	-0.29	-0.4	1.63	-0.43	0.49	-0.54
GENE3753X	IMAGE:824332	220282 Homo sapiens cDNA FLJ31753 fis, clone NT2RI2007468 Hs.349283 AA489664	1	-0.07		0.25	-1.26	-0.42	0.81	-2.25	2.54	-0.99	1.84	0.4	1.44	0.01	0.69	0.65	0.75	-0.03	1.34		0.88	-0.75	-0.22		-0.42		-1.4	-0.65		-0.03	-0.02	0.11	-0.47	-0.71	-0.71	0.06		1.5		-0.06	-0.08	0.74	-0.72	-0.12	-0.33	1.45	-1.26
GENE3903X	IMAGE:897547	221179 Homo sapiens cDNA FLJ31079 fis, clone HSYRA2001595 Hs.350401 AA489592	1	-0.45	-0.48	-0.09	-0.91	-0.48	0.43	-1.52	1.69	-0.31	1.01	0.74	0.2	0.6	0.25	-0.38	0.47	-0.08	1.31	0.1	0.6	0.23	-0.17	0.51	-0.07	-0.46	-0.26	-1.23	0.57	-0.15	0.03	0.97	-0.64	-0.56	0.12	0.47	-0.97	0.92	-0.78	0.13	-0.12	0.01	-0.53	-0.4	-0.26	0.39	-1.49
GENE4400X	IMAGE:1460073	224058 RAI14 retinoic acid induced 14 Hs.15165 AA864840	1	-0.04	0.01	0.54		-0.75	0.13	0.31	0.72	0.21	0.88	-0.1	0.89	-0.61	0.12	0.54		0.25	0.64	-0.56	0.27	0.1	0.49	-0.14	-0.37		-0.08	0.24	-0.76	0.34	0.5	0.65	-0.33	0.48	-0.26	-0.29	-1.47	0.42	-0.49	0.32	-0.76	0.67	0.47	0.54	-0.13	-0.47	-0.8
GENE6632X	IMAGE:365177	99660 FLJ22242 hypothetical protein FLJ22242 Hs.288057 AA024865	1	-0.28	-0.42	-0.38	0.27	-0.35	0.14	-0.08	1.62	0.26	1.18	-0.1	-0.06	-0.22	0.35	0.24	-0.25	-0.32	0.94	-0.54	-0.44	0.62	0.01	-0.26	-0.29	-0.76	-0.33	-0.36	-0.54	-0.5	-0.21	-0.02	0.04	0.08	1.53	0.01	-0.29	-0.1	-0.56	-0.38	-0.09	-0.43	-0.95	-0.08	-0.03	-0.39	-0.34
GENE2865X	IMAGE:838478	116454 NCALD neurocalcin delta Hs.90063 AA457517	1	-0.07	1.44			-0.92	0.22	-0.43	1.24			-0.13	1.14	-1.57	-1.12		-1.02	-0.21		-0.61		-0.8		-1.32	-0.94	-0.91	0.11	-1.87	-0.58	-1.48	-0.42	0.4	-0.19	-0.7	-1.07	-0.32	-0.35	-0.74	-1.35	-0.07	0.46	-0.73	-0.26		-0.24	2.13	-1.34
GENE2519X	IMAGE:629907	114499 ESTs, Weakly similar to 2109260A B cell growth factor [H.sapiens] Hs.86815 AA219229	1	-0.37	0.97	-0.36		-0.58	-0.31		0.71	0.12	-0.6	0.32	0.41	-0.65	-0.39	-0.02		-0.28	1.34	-0.3	-0.4	-0.32	-0.66	-0.75	-0.41	-0.5	-0.24	-0.69	-0.4	-0.42	-0.37	0.38	-0.62	-0.53	-0.77	-0.23	-0.28	-0.39	-0.73	0.23	0.13	-0.76	-0.11	-0.38	-0.45	1.91	-1.29
GENE3860X	IMAGE:1035765	220929 NCALD neurocalcin delta Hs.90063 AA629117	1	-0.03	1.14	-0.49		-1.1	-0.05	-0.32	0.34	-0.47		0.1	-0.6	-0.71	-0.52	0.33	-0.03	-0.64		-0.5	0.46	-0.31	0.65		-0.49		-0.24	-0.66	0.12	-0.39	-0.26	0.86	0.09	-0.15	-1.16	-0.03		-0.8	-0.64	-0.16	-0.18	0.38	0.08	-0.06	0.24	1.8	-1.07
GENE5101X	IMAGE:1635779	307365 DKFZP564O0823 DKFZP564O0823 protein Hs.105460 AA995890	1	0.25	-0.18	-0.26		-0.17	1.79	-1.1		-1.1	-0.63	-0.7	-0.24	-0.92	-0.31	-0.37		-0.02	0.19	-0.53	-0.02	0.02	-0.36	-0.64	-0.55		0.09	0.14	0	-0.49	-0.02	0.22	0.05	0.43	-0.87	0.81		-0.15	-0.62	0.51	0.23	0.82	-0.14	0.94	0.11		0.15
GENE1140X	IMAGE:561851	106632 Homo sapiens cDNA: FLJ22547 fis, clone HSI00356 Hs.6634 AA086292	1	0.44	-0.7	-0.74	-0.14	-0.31	0.91	-0.51	-0.78	-0.73	-0.76	0.05	-0.2	-0.55	-0.53	-0.08	-1.79	-0.05	1.06	0.17	0.23	0.1	-0.38	-0.6	-0.58	-0.03	0.57	-0.93	-0.07	-0.96	-0.4	-0.48	0.02	-0.33	-1.16	-0.1	-0.73	-0.08	-0.6	1.16	-0.06	0.43	-0.58	0.39	-0.45	-0.85	-0.91
GENE4833X	IMAGE:1558655	226414 FLJ22316 hypothetical protein FLJ22316 Hs.7331 AA976561	1	-0.6	-0.47	-0.44	-0.47	2.05	1.06	-1		-0.99	-1.03	1.3	-0.12	0.63	-1.91	-1.49	-2.36	0	-0.45	1.54	-0.13	-0.98	-0.39	-1.05	-0.64	-0.46	0.02	-0.32	-1.59	-1.47	-1.11	0.54	-0.06	0.63	-0.42	0.23	-2.03	-1.35	-1.16	0.15	-0.63	0.89	0.45	-1.1	-1.38	-1.71	0.9
GENE6299X	IMAGE:1883559	319580 FST follistatin Hs.9914 AI214697	1	-0.61	-0.45	-1.67	-0.51	-0.43	4.48	0.91	0.82	-1.53	-0.3	-1.59	-1.44	-0.23	-0.68	-2.49		-0.28	-0.12	-0.44	0.71	-0.77	-0.63	0.2	-0.95	-0.5	-0.85	-0.88	-0.95	0.01		-1.05	0.81	0.28	-1.63	-1.31		1.44	-0.19	-1.33		-0.96	-0.92	-1.08	-0.84	-1.8	1.54
GENE897X	IMAGE:132140	105196 Homo sapiens mRNA; cDNA DKFZp667D095 (from clone DKFZp667D095) Hs.93961 R23609	1	-0.45	-0.61	-1.04	0.6	-0.17	0.43	0.35	2.02	-0.31		-0.08	-0.87	1.76	-0.34	-0.83	-1.35	-0.42	-1.54	0.23	1.21	0.13	-1.37	-0.01	-0.67		-1.45	-0.99	-0.72	-1.76	-0.41	-0.61	-0.18	1.06	-1.01	-0.26	0.38	-0.54	-1.3	-0.75	-0.52	-1.07	-0.09	-0.02	0.09	0.32	0.63
GENE5732X	IMAGE:1476466	311945 KIAA1921 KIAA1921 protein Hs.348392 AA886905	1	-0.29	-0.48	-0.08		-0.3	0.71	-0.82	-0.1	-0.14	0.13	1.16	0.12	-0.4	-0.54	0.46		0.64		0.69	0.83	0.36	0.05	-0.43	-0.67	-0.66	-0.4	-0.06	-0.56	-0.86	-0.37	-0.41	-0.41	0.22	-0.04			-0.42	0.14	-0.64	-0.59	-0.86	-0.14	0.25	0.53	1.02	-0.65
GENE1435X	IMAGE:342211	108331 CPSF2 cleavage and polyadenylation specific factor 2, 100kD subunit Hs.224961 W63789	1	-0.45	0.19	-0.12		0.03	0.2	0.75	-0.42	-0.26	0.38	0.94	0.37	-0.24	0.16	-0.38		0.64	-0.01	0.79	-0.68	-0.58	0.31	-0.37	-0.13	0.16	1.14	0.41	-0.37	-0.19	-0.49		0.05	-0.06	1.21	0.9	0.67	0.63	0.55	-0.78	0.32	-0.42	-0.59	0.99	0.35	0.56	-2.31
GENE1422X	IMAGE:767261	108252 Homo sapiens cDNA FLJ13103 fis, clone NT2RP3002304 Hs.29643 AA418403	1	-0.19	0.28	-0.1	0.44	-0.33	0.08	-0.25	-0.09			1.34	0.49	0.04	-0.16	0.38	-0.93	-0.01	-0.25	-0.02	-0.63	-0.26	-0.02	-0.22	-0.1	0.36	0.35		-0.14	0.45	-0.05	0.07	0.34	-0.36	0.35	0.54	0.14	-0.18	0.44	0.08	0.26	0.13	0.48		0.01	-0.11	0.36
GENE5362X	IMAGE:1574420	309071 APACD ATP binding protein associated with cell differentiation Hs.153884 AA954921	1	-0.17	-0.06	-0.13	0.59	0	0.38	0.19	-0.15		0.88	1.06	0.73	-0.1	0.99	0.33		0.08	0.64	0.4	-0.24	-0.03	0.31	-0.39	-0.45	-0.38	-0.19	-0.67		-0.17	-0.38	-0.32	-0.32	0.11		-0.54		0.46	0.1	-0.47	-0.6	0.33	0.54	0.09	0.55
GENE3011X	IMAGE:345262	117184 PCDHB2 protocadherin beta 2 Hs.266470 W72881	1	0.05	0.15	0.51	0.15	0.02	-0.02	-0.76	0.99	0.86		0.47	1.18	-0.1	1	0.2	-0.73	-0.27	-0.57		0.67	-0.1	0.33		-0.15	0.15	-0.17	-0.26	0.53	-0.55	-0.56	0.47	-0.21	0.92	1.17	0.12	0.05	0.53	-0.06	0.1	-0.38	-0.34	-0.53	0.82	0.12	0.38	-0.61
GENE5793X	IMAGE:1456489	312648 STXBP1 syntaxin binding protein 1 Hs.239356 AA864978	1	-0.01	0.14	-0.19	-0.43	-0.38	-0.06	-0.24		1.13		0.68	0.89	0.41	1.04	1.26		0.84	-1.85	0.19	0.47	0.7	-0.01	0.45		0.36	-0.2	-0.38	0.12	0.19	0.18	0.8	-0.11	-0.13	0.2	0.79		0.06		0.37	-0.09	-1.25	0.48	0.18		0.68	-1.65
GENE4033X	IMAGE:448027	222034 STXBP1 syntaxin binding protein 1 Hs.239356 AA702799	1	-0.75	-0.29	-0.45	-1.28	-1.29	-0.84	-0.52	0.67			1.61	1.55		1.42	1.31	-1.41	0.7	-1.75	0.48	0.04	0.66	0.67		-0.04		-0.66	-1.61	-0.12	-0.37	0.04	0.77	-0.32	-0.04	0.71	0.66	0.34	-0.78	-0.25	-0.44	-0.21	0.05	1.05	0.46	0.58	0.9	-1.31
GENE564X	IMAGE:30502	103175 DLL1 delta-like 1 (Drosophila) Hs.250500 R18606	1	-0.03	-0.25	-0.52	-0.08	-0.21	0.04	-0.69	-0.77	0.11	1.12	0.34	-0.43	-0.6	-0.86	-0.4	-0.82	-0.31	-0.43	-0.12	0	-0.45	0.42	-0.13	-0.15	-0.31	0.95	0.81	0.39	0.24	-0.15	0.38	-0.26	0.27	-0.42	-0.66	-0.23	-0.58	-0.43	-0.92	-0.02	-0.13	0.23	0.06	0.16	-0.14	-0.47
GENE1873X	IMAGE:878836	110839 SGNE1 secretory granule, neuroendocrine protein 1 (7B2 protein) Hs.2265 AA670429	1	0.25	0.06	-0.63	-0.62	-0.14	-0.8	-0.39		-1.14		0.33	-0.65	-0.16	-1.15	-0.85	-1.23	-1.02		0.9	-0.47	-0.29	0.36	-0.08	-0.3	-0.23	-0.66	-0.6	-0.64	-0.67	-0.61	-0.75	-0.41	-0.12	-1	-0.51	-0.21	0.37	0.03	-0.99	0.17	-0.35	0.31	0.09	-0.45	-0.05	-1.15
GENE5088X	IMAGE:2018074	307287 PBX1 pre-B-cell leukemia transcription factor 1 Hs.155691 AI364369	1	0.01	-0.04		0.08	-0.75	0.13	0.57	1.71	-0.04	1.13	0.07	0.53	-0.59	0.57	1.28	-1.65	-0.68	-1.72	-0.59	0.22	0.84	-0.95	-0.3	-0.38	-0.29	0.63	-0.34	0.12	-2.04	-1.43	-0.4	-1.17	0.65	-1.36	-0.11	-0.87		-1.04	0.29	0.04	1.39	-0.21	0.38	-0.03	0.85	-0.43
GENE3368X	IMAGE:741880	119414 PBX1 pre-B-cell leukemia transcription factor 1 Hs.155691 AA401304	1	-0.27	0		0.31	-0.9	-0.16		1.73	0.25	0.83	0.47	0.02	-0.31	0.37	1.46	-2.27	-0.82		-0.25	0	0.93	0.3		-0.16	0.05	0.44	0.01	0.13	-1.05	-1.4	-0.72	-1.17	0.86	-1.41	-0.68		0.07	-0.48	-0.54	0.19	1.5	-0.16	0.63	-0.26	0.42	-1.12
GENE193X	IMAGE:297604	101131 Homo sapiens mRNA; cDNA DKFZp586J2118 (from clone DKFZp586J2118) Hs.21851 N69835	1	-0.45	0.12	-0.86	0.77	-0.69	0.21	0.02		0.02	1.47		-0.51	-1.02	1.43	1.8	-2.88	-0.7	-1.06		-0.02	1.05	-0.6	-0.39	-0.16	0.22	0.69	-1.2	-1.32	-2.18	-1.68	-1.53	-1.62	1.09	-1.65	-1.19	-0.5	0.23	-1.32	-0.78	0.56	1.31	-0.96	0.8	-0.25	0.95	-1.41
GENE1609X	IMAGE:212542	109255 Homo sapiens mRNA; cDNA DKFZp586J2118 (from clone DKFZp586J2118) Hs.21851 H68663	1	-0.28	-0.18	-1.35	0.59	-1.2	-0.17	0.4	1.51	-0.58		0.92	-0.59	-1.09	0.83	1.39	-3.1	-1.48	-1.27	-0.5	-0.36	1.25	-0.29	-0.38	-0.09		0.49	-1.21	-0.84	-2.01	-2	-1.66	-1.91	1	-1.66	-0.96	-1.21	-0.24	-1.67	-0.65	0.36	1.03	-0.61	0.54	-0.4	0.52	-1.26
GENE6410X	IMAGE:200656	98389 Homo sapiens mRNA; cDNA DKFZp586J2118 (from clone DKFZp586J2118) Hs.21851 R98407	1	-0.22	0.19	-1.05	0.44	-0.84	-0.04	0.35	1.53	-0.82	0.84	1.01	-0.23	-1.21	0.73	1.49	-3.05	-1.23	-1.25	-0.38	-0.52	1.16	0		-0.22	-0.25	0.39	-1.39		-1.87	-1.9	-1.88	-1.77	0.86	-1.94	-0.78	-0.76	-0.23	-1.68	-0.18	0.39	0.64	-0.67	0.63	-0.37	0.17	-1.63
GENE3412X	IMAGE:321900	119689 ESTs Hs.285864 W37447	1	-0.59		-0.64	0.08	-1.34	-0.01	-1.06	1.78	1.71	0.83	1.06	1.19	-0.5	1.39	2.18	-0.84	-0.8	0.11		0.4	-0.15	0.41		-0.39	0.61	-1.32	-0.93		-0.4	-0.39	-0.54	-0.86	0.57	-0.93	-0.44	-0.55	-0.27	-1.2	-0.24	-0.61	0.73	-0.4	0.51	-0.06	0.08	0.85
GENE2145X	IMAGE:504791	112412 GSTA4 glutathione S-transferase A4 Hs.169907 AA152346	1	-0.43	-0.25	-0.9		-0.96	0.41	1.07	1.77	0.23	-0.05	2.4	0.98	0.29	1.53	0.59	-0.7	-0.88	-1.27	0.28	-0.52	-0.74	2.24	-0.88				-1.27	-1.46	-0.74	-1.28	-1.54	-1.97	0.8	-1.92	-0.64	-1.07	-1.25	-1.12		-0.36	0.46	0.36	-0.1	0.23	-0.07	-0.21
GENE2164X	IMAGE:796197	112511 DMD dystrophin (muscular dystrophy, Duchenne and Becker types), includes DXS142, DXS164, DXS206, DXS230, DXS239, DXS268, DXS269, DXS270, DXS272 Hs.169470 AA461118	1	-0.23	-0.09	-0.63	-0.18	-0.6	0.27	-0.08	-0.39	0.07		1.76	0.73	-0.59	-0.47	-0.92	-0.85	-0.16	0.09	0.05	-0.3	0.12	-0.2	-0.56	-0.12			-0.3	-0.49	-0.63	-1.01	-0.75	-1.02	0.56	-0.66	-0.51	-0.38	-0.61	-0.4	-0.6	0.3	-0.58	0.87	0.17	-0.31	0.68	0.28
GENE5216X	IMAGE:2019217	308074 SYP synaptophysin Hs.75667 AI360356	1	-0.11		-0.81	0.65	-0.94	-0.05	2.23	-0.83	-0.19			2.19	0.09	-0.57	-0.87	-2.02	-0.31		-0.31	-0.6	-0.61	-0.51	-0.49	0.02		-1.31	-0.21	-0.06	-0.07	-0.58	-0.77		0.3		-0.5	0.58	-0.39		-0.64	-0.83		-0.21	-0.55	0.3	0.41	-0.62
GENE6548X	IMAGE:530185	99181 CD83 CD83 antigen (activated B lymphocytes, immunoglobulin superfamily) Hs.79197 AA083671	1	0.18	-0.03	0.52	-0.38	-0.54	-0.18	-0.71	-0.32	0.02	-0.08	0.14	0.35	-0.09	0.05	-0.55	-0.78	0.17	-0.17	0.33	-0.04	-0.78	-0.23	-0.67	-0.11	0.25	0.97	-0.08	0.43	0.13	0.04	-0.36	-0.39	-0.08	-0.98	-0.27	-0.57	-0.26	-0.29	0.22	-0.41	0.17	0.25	0.64		-0.49	-0.05
GENE2461X	IMAGE:307471	114192 TM4SF2 transmembrane 4 superfamily member 2 Hs.82749 N93505	1	0.22	0.26	0.66	-0.18	-0.92	-0.02	-1.67	-0.06	0.03	-1.84	-0.09	0.96	-0.77	-0.84	-0.8	-1.91	-1.07	-2.27	-0.51	-1.76	-1.66	-0.82	-1.81	-0.49	0.75	2.11	-1.92		-0.68	-0.03	-2.12	-1.75	-0.53	-2	-0.99	-1.25	-1.02	-0.79	-0.39	-0.61	0.05	0.21	-0.28	0.42	0.06	-0.54
GENE4236X	IMAGE:24271	223072 KIAA0808 KIAA0808 gene product Hs.184297 R39310	1	0.14	-0.09	0.06	-1.4	0.01	-0.13	-0.81	-0.7	-0.92	-1.57	-0.67	0.21	-1.43	-1.97	-0.04	-0.84	-0.28	-1.36	-0.19	0.26	0.69	0.01	-0.75	-0.11	0.2	1.14		-0.02	-0.48	-1.32	-0.69	0.12	-0.37	-0.81	-0.84	-0.42	-0.39	-0.37	-0.83	-0.14	-0.57	-0.15	-0.59	0.02	-0.86	-1.29
GENE954X	IMAGE:758298	105554 KIAA0808 KIAA0808 gene product Hs.184297 AA401275	1	-0.28	-0.96	-0.29		-0.5	0.18	-1.28		-1.57	-2.33		0.84	-1.23	-1.67	-0.69		0.13	-1.69	-0.94	-0.06	0.5	-0.68	-0.29	-0.49	0.22	1.04	-0.42	-1.33	-1.05	-1.06	-1.09	-0.34	-0.45	-1.1	-1.71	-0.8	-0.4	-0.49	-0.69	-0.06	-1.01	-1.15	-0.53	0.16	-1.09	-1.47
GENE5265X	IMAGE:971188	308379 AA774927	1	-0.01	-0.62	-0.61		-0.12	-0.02	-0.31					0.35	-1.02	-0.4	-0.71	-0.59	-0.15			-0.06	0.07	-0.01	0.01	-0.06	0.27	0.52	0.23	-0.7	-0.21	0.05	-0.01	-0.54	0.56	-1.01	-1.26	0.56	-0.11	-0.38	-0.66	0.2	-0.01	0.34	0.14	-0.9	-1.09	-0.94
GENE3250X	IMAGE:813828	118685 KIAA0367 KIAA0367 protein Hs.23311 AA447773	1	-0.34	0.84	-0.37		-0.27	-0.23	-0.51				-1.43	-0.33	-0.6	-0.17	-0.96		-0.29		-0.5	-0.35	0.2	-0.21	-0.6	-0.38	-0.16	0.03	-0.21	-0.32	-0.46	-0.19	-0.97	-0.36	-0.15	-0.24	0.15	-0.09	-0.37	-0.33	-0.59	0.51	0.63	-0.85	-0.08	-0.84	-0.21	-0.51
GENE1605X	IMAGE:304975	109249 KIAA0318 KIAA0318 protein Hs.65746 N93214	1	0.01		-0.04		-0.17	-0.19	-0.13	-0.24			-0.18			-0.19	-0.63		0.14			0.05	0	-0.31	-0.19	-0.11	-0.31	-0.29	0.51	-0.04	-0.04	0.31	-0.46	-0.45	-0.17	-0.63	0.09	-0.3	0.1	-0.1	-0.29	-0.2	-0.27	-0.16	-0.44			-0.3
GENE888X	IMAGE:174627	105163 SCG2 secretogranin II (chromogranin C) Hs.75426 H27864	1	-0.09	-0.54	-0.15	-0.19	0.16	-0.39	-0.07	1.17	-1.12	-0.78	-1.73	1.62	-0.88	-0.21	-1.5	-0.72	-0.1	-1.18	0.17	-0.38	0.05	0	0.57	0.06	-0.35	-0.28	-0.51	-0.58	-0.44	0.38	-0.51	-1.28	-0.54	-0.79	0.42	0.66	1.14	0.15	-1.06	0.59	-0.26	-0.12	-0.57	-0.1	-0.58	-0.78
GENE860X	IMAGE:592498	104977 SDCCAG8 serologically defined colon cancer antigen 8 Hs.300642 AA161465	1	-0.27	-0.51	-0.85	0.37	-0.87	0.37	-0.1	1.97	-0.43	-0.39	-0.84	0.81	-0.62	-0.39	-0.53		-0.01	-0.25	-0.65	-0.39	0.74	-0.09	-0.19	-0.37	-0.01	-0.62	0.01	-0.64	-0.64	-0.65	-0.8	-0.39	-1.21	0.2	0.12	0.49	-0.02	-0.14	0.05	0.37	0.23	-0.52	0.11	0.22	1	0.7
GENE2288X	IMAGE:767486	113177 MGC20460 **hypothetical protein MGC20460 Hs.29796 AA418015	1	-0.23		0.39	-0.3	-0.48	0.14	-0.22	0.97	-0.97	-0.8	0.07	0.28	0.21	-0.41	-0.04	-0.96	0.13	0.16	-0.63	-0.45	-0.23	-0.25	-0.38	-0.16	-0.35	0.11	-0.55	-0.41	-0.04	0.15	-0.05	-0.11	-0.29	-0.1	0.26		-0.58	0.22	0.36	-0.03	-0.7	-0.14	0.08	0.32		-0.18
GENE2712X	IMAGE:230560	115600 ESTs Hs.39720 H75859	1	0.26	-0.43	0.16		-0.32	0.21	0.05	0.35	-0.76	-0.23	-0.62	-0.36	0.06	-0.41	-0.13		0.21	-0.6	-0.34	0	-0.14	-0.07	-0.35	-0.08	-0.29	0.08		0.06	0.13	-0.22	-0.16	-0.15	-0.05	-0.05	0	-0.22	-0.38	-0.34	-0.47	-0.38	-0.18	-0.07	0.1	-0.04	0.06	-0.25
GENE2569X	IMAGE:380737	114806 ABCA4 ATP-binding cassette, sub-family A (ABC1), member 4 Hs.198396 AA054277	1	0.1		0.08	-0.23	-0.4	0.01	-0.53	0.47	0.13	-0.29	-0.11	0.37	0.07	-0.11	-0.19	0.07	0.27	-0.07	0.07	0.58	0.02	-0.14	-0.74	-0.07	-0.05	0.11	0.17	0.19	0.12	0.04	-0.03	-0.15	-0.2	-0.13	-0.06	-0.27	-0.03	-0.13	0.85	-0.39	-0.47	-0.1	-0.43	0.01	0.31	-0.06
GENE2730X	IMAGE:45877	115725 ESTs, Weakly similar to T29299 hypothetical protein C50F7.2 - Caenorhabditis elegans [C.elegans] Hs.4302 H08581	1	-0.13	-0.26		-0.78	-0.54	0.2		1.39	0.46	-0.56	3.16	1.02		0.18	-0.03				0.65	1.94	0.23	-0.57	-0.24	-0.33			0.22	0.14	-0.52	-0.74	-0.07	-0.11	-0.37	-0.79	-0.3	-0.45	-0.28	-0.38	0.22		-0.42	-0.2	-0.24	-0.43	-0.69	-0.8
GENE6453X	IMAGE:767475	98640 CART1 **cartilage paired-class homeoprotein 1 Hs.41683 AA418020	1	-0.38	-0.53	-0.3		-0.83	-0.07	-0.65	0.62	2.22	-0.11	1.48	1.88	0.34	0.3	1.9		-0.24			-0.3	-0.24	-0.52	-0.32	-0.03	-0.38	-0.16	-0.29	0.37	0.1	0.21	-0.87	-0.83	0.55	-0.9	-0.65		-0.21	-0.39	-0.69	-0.59	-0.23	0.38	-0.18	0.63
GENE5623X	IMAGE:1911864	310772 GNG4 guanine nucleotide binding protein 4 Hs.32976 AI278730	1	0.06	0.17	0.14	-0.08	-1.17	-1.17	-0.81	2.01	0.63	-0.74	1.84	1.58	0.33	-0.39	-0.23	-0.21	0.16	-1	0.11	0.15	0.05	0.31	-0.36	0.52		-0.33	-0.93	-0.4	-0.42	-1.4	-0.41	-0.82	-0.12	-1.49	-0.55	0.73	0.95	0.23	0.04	-1.13	-0.88	-0.53	0.41	0.15	-0.24	-0.9
GENE5344X	IMAGE:1916771	308956 MTRF1 mitochondrial translational release factor 1 Hs.80683 AI347695	1	-0.39	0.19	0.14	0.55	-0.27	-0.25	-0.64	0.81	0.51	0.7	1.59	0.71	0.28	-0.03	-0.02	0.28	0.32	-0.27	-0.06	-0.08	0.11	0.26	-0.51	-0.7	-0.14	-0.2	0.24	-0.13	-0.34	-0.26		-0.03	0.33	-0.3	0.21	0.13	0.65	-0.2	-0.7	-0.12	0.2	0.66	1.15	0.29	-0.18	-0.22
GENE5467X	IMAGE:2021039	309721 LOC57797 hypothetical protein R31240_1 Hs.20707 AI365474	1	-0.5	-0.32	-0.2		0.19	0.06		1.07	0.49	0.64	0.37	1.61	0.22	0.35		-0.03	0.23	-0.57	-0.22	-0.33	-0.8	-0.55	-0.28	-0.24	0.53		0.32	-1.12	-0.13	0.19	-0.05	-0.59	0.14	0.06	-1.04		0.08	-0.02	-0.51		-0.82	-0.03	-0.67	-0.26	-0.38	0.19
GENE2748X	IMAGE:121136	115832 C8orf13 reserved Hs.35453 T96924	1	0.21		-0.04	0.04	0.14	-0.22	0.27	1.11		-0.6	0.3	1.27	0.07	-0.48	-0.42		-0.2		-0.06	0.06	-0.35	-0.31	0.37	0.75	0.56	0.51	0.42	0.04	-0.15	0.05	-0.48	-0.5	-0.02	-1.29	-0.27	0.08	-0.07	0.45	-0.76	0.06	-0.39	-0.11	-0.46	-0.53	-1.2
GENE1718X	IMAGE:199228	109872 C8orf13 reserved Hs.35453 R95765	1	0.31	0.27	0.36	-0.87	0.34	-0.39	-0.11	0.96		-0.36	-0.18	1.48	-1.66	-2.1	0.17	-1.27	-1.18	-1.26	-0.19	0.12	0.03		0.68	-0.43	0.02	0.72		-0.81	-0.31	0.16	0.08	0	0.17	-0.78	-0.03	0.17	-0.2	-0.26	-1.29	0.11	-0.63	0.16	-0.27	-0.29	-0.04	-0.33
GENE1468X	IMAGE:48142	108487 Homo sapiens clone 24672 mRNA sequence Hs.5010 H12104	1	0.28	0.05	0.24	-0.35	-0.2	-0.8	-0.07	0.88		1.04	1.28	-0.27	0.25	0.15	0.33	-1.32	-0.25	-0.01	-0.38	0.04	0.02	0.48	0.08	-0.16	-0.27	0.55		0.03	0.31	0.12	-0.04	-0.26	0.42	-0.31	-0.22	-0.2	-0.23	-0.27	-0.74	-0.09	-0.58	0.25	0.07	0	-0.11
GENE2637X	IMAGE:272200	115164 Homo sapiens cDNA: FLJ22130 fis, clone HEP19632 Hs.146233 N31493	1	-0.14	1.08	0.56		-0.52	-0.06	0.06	1.31			1.59	-0.24	0.76	-0.69	-1.53		0.56			-0.05	-0.66	-0.16	-0.85	-1.43	-0.09	-0.06	-0.42	0.25	0.04	0.35	0.39	-0.34	0.81	0.07	-0.58	0.29	0.3	-0.49	-0.45	1.03	0.95	0.65	0.22	0.59	-0.29	0.29
GENE4480X	IMAGE:461468	224472 ESTs Hs.163036 AA705029	1	-0.57	-0.41	-0.7	-0.7	-0.57	-1.27	-1.05	4.07	-1.09	0.18		0.13	-0.44	-0.24	-1.32	-0.49	-0.49	0.48	-0.51	-0.08	0.23	1.06	0.11		-0.7	-1.13	-0.84	0.83	-0.35	-0.5	0.18	-0.6	-0.33	-0.45	0.13	1.77	3.46	-1.18	0.29	0.38	0.66	-0.37	0.49	0.11	-0.95	-0.21
GENE1278X	IMAGE:296448	107467 IGF2 insulin-like growth factor 2 (somatomedin A) Hs.349109 N74623	1	-1.08	-0.59	-1.33	-0.96	-0.19	-0.95	-1.06	5.11	-0.77	1.18	-0.37	-0.65	-0.7	-0.42	-1.95		-0.06	0.03	-0.75	0.07	-0.04	1.18	0.68	-0.68	0.01	-0.96	-0.49	0.54	-0.28	-0.36	-1.14	-0.51	-1.22	-1.01	0.2	1.96	3.77	-0.89	0.26	0.46	0.38	-0.58	-0.06	-0.45	-0.64	-0.69
GENE2941X	IMAGE:245330	116829 IGF2 insulin-like growth factor 2 (somatomedin A) Hs.349109 N54596	1	-0.52	-0.02	-0.6	-1.32	-0.04	-1.2	-1.04	3.91	-0.26	0.56	-0.22	-0.26	-0.37	-0.87	-0.7	-0.8	-0.12	0.38	-0.11	0.01	0.08	1.24	0.54	-0.6	-0.07	-0.26	-0.95	0.14	-0.28	-0.5	-0.52	-0.41	-0.83	-0.51	-0.29	1.41	2.98	-0.43	0.02	0.5	0.33	-0.26	0.06	-0.34	-0.32	0.11
GENE6307X	IMAGE:207274	319669 PLCB2 phospholipase C, beta 2 Hs.251664 H59614	1	-0.83	-0.66	-0.97	0.14	-0.3	-1.52	-1.53	4.73		1.35	-0.56	-0.26	-0.21	0.04	-2.16	-0.9	0.09		0.16	-0.66	-1.19	0.22	0.21	-0.18	0.53	-0.59	-0.25	-1.27	-0.68	-0.32	-0.16	-1.72	-1.35	-1.38	-0.84	2.39	3.52	-0.19	-0.05	0.39	-0.01	-1.47	-0.03	-1.15	-0.87	0.09
GENE1651X	IMAGE:809838	109504 AA455102	1	-0.24	-0.36	-0.53	-0.94	1.02	0.75	-0.25	1.6	-0.04	-1.02	1.01	0.09	-0.05	0.16	-0.65	-1.16	0.39	-0.89	0.3	0.33	0.14	-0.17	0.47	-0.76	0.4	0.53	0.77	0.56	-0.3	-0.01	-0.96	0.7	-0.32	-0.65	-0.09	-0.32	-0.23	0.09	-0.2	0.07	0.13	0.3	0.79	0.69	-1.05	-0.54
GENE1416X	IMAGE:209137	108211 GABRE gamma-aminobutyric acid (GABA) A receptor, epsilon Hs.22785 H63532	1	0.12		-0.61	-0.4	-1.08	-0.15	-0.8	-0.95		-1.22	0.51	0.15	-0.39	-0.52	-0.56	-1.75	-0.7	-1.04	1.28	0.56	-0.28			-0.5	-0.18	1.69	-0.14	0.98	0.05	0.42	-1.15	-0.49	-0.93	-1.55	0.58	1.16	-0.39	-0.56	0.3	-0.28	2.05	2.82	1.98	2.73	-1	-0.79
GENE1628X	IMAGE:121798	109349 FLJ11127 hypothetical protein Hs.91165 T98200	1	0.13	-0.59	-0.15	0.78	-1.09	-0.57	0.11	-0.18	0.02	0.04	0.34	1.27	-0.51	-1.13	-0.75	-1.6	1.11		-0.48	0.84	-0.64	0.72		-0.47	-0.63		0.95	0.44	0.3	-0.3	-1.24	-1.22	0.46	-1.32	-1.48	-0.75	-0.73	-0.74	-0.36	-0.59	2.06	-0.28	2.06	1.54	1.11	-1.07
GENE5229X	IMAGE:1537001	308139 ESTs Hs.24210 AA933892	1	-1.07	-0.48	-0.42	-0.73	-0.16	-0.74	0.28	-0.86	0.81	1.38	-0.32	0.89	-0.6	0.04	0.6	-1.55	0.58	-0.3	0.06	-0.71	-0.84	-0.81	-1.04	-0.24	-0.34	0.71	0.21	0.4	0.47	0.19	-0.72	0.39	0.45	-1.22	-0.59	-1.11	-1.02	-0.68	-0.71	-0.5	1.73	1.26	0.93	0.35	1.15	-1.52
GENE4125X	IMAGE:491519	222499 Homo sapiens clone 24775 mRNA sequence Hs.109438 AA115054	1	-0.58		0.28	1.76	0.45	-1.12	0.1	-0.56	-0.87		-0.49	-0.82	-1.11	-0.5	-0.26	-1.31	0.22	-0.31	-0.39	-1.09	-0.72	-1.39	-0.49	-0.52	0.84	1.78	-0.87	1.19	1.41	-0.03	-0.64	-0.93	-0.11	1.5	-0.68	-0.18	-0.04	-0.43	-0.38	0.27	1.37	0.62	0.32	0.38	0.84	-0.37
GENE4879X	IMAGE:1469379	226685 DRCTNNB1A down-regulated by Ctnnb1, a Hs.85603 AA863470	1	0.14	0.07	-0.28	0.81	-0.19	-0.23	-0.36	-1.94	-0.46	-0.4	-1.33	0.5	0.02	-0.66	-0.77	-1.58	-0.35	-1.57	0	0.36	0.19	-0.11	-0.04	0.49	-0.33	0.42	0.07	0.59	0.34	-0.75	-0.75	-0.51	-0.24	-0.96	-0.09	-0.69	-0.08	-0.04	0.16	0.7	1.08	-0.36	-0.39	0.42	1.44	-0.18
GENE2273X	IMAGE:811878	113089 DRCTNNB1A down-regulated by Ctnnb1, a Hs.85603 AA454633	1			0.08	0.62	-0.08	-0.31	-0.23	-1.65	-0.06	-0.08		0.53	0.11	-0.81	-0.32	-1.91	-0.55		-0.02	0.13	-0.02	0.27	-0.25	0.06	0.11	0.76	-0.32	0.41	-0.24	-0.46	-0.53	-0.06	-0.07	-0.7	-0.08	0.18	0.39	-0.28	-0.04	0.51	0.61	-0.42	0.01	0.69	1.35
GENE318X	IMAGE:754157	101872 DRCTNNB1A down-regulated by Ctnnb1, a Hs.85603 AA478775	1	-0.61	0.55	0.18	0.84	0.51	-0.24	0.51	-1.02	0.51	1.04	-0.12	0.55	0.09	-0.06	-0.49	-1.33	-0.27	-0.73	0.23	-0.25	0.21	-0.7		0.32	-0.31	0.37	-0.83	0.55	-1.52	-1.1	-0.59	-0.61	-0.47	-1.18	0		0.29	-0.87	0.49	0.62		-0.3	-0.86	0.54	1.84	-0.44
GENE5493X	IMAGE:564849	309923 Homo sapiens cDNA FLJ30547 fis, clone BRAWH2001439 Hs.351021 AA129218	1	-0.32	-0.25	-0.37	-0.1	0.12	-0.32	0.44	-0.41	-0.55	-0.51	-0.71	0.98	0.44	0.48	-0.31	-0.9	-0.02	-0.6	-0.2	-0.43	0.04	-0.36	0.8	0.86		0.4	0.05	0.16	-0.75	-1.12	-0.58	-0.36	-1.05	-0.84	0.16	0.73	0.36	0.62	-0.03	0.38	0.37	-0.14	-0.09	-0.07	1.78	-0.93
GENE327X	IMAGE:812961	101920 KIAA1389 KIAA1389 protein Hs.18760 AA464598	1	0.04		-0.11	0.97	-0.36	0.3	0.5	-0.57	-0.11	0.24		-0.21	-0.32	0.16	-0.83	-2.14	1.12		0.47	-0.24	0.84	-1.02		0.46	-0.23	-0.47	-0.2	0.39	-0.45	-0.47	0.63	-0.11	-0.45	-2.03	-0.6	-1.26	-0.4	-1	0.65	0.31	-0.9	0.14		1.29	0.95	-0.03
GENE6197X	IMAGE:1935427	318166 FLJ12649 hypothetical protein FLJ12649 Hs.24078 AI368156	1	-0.39	0.57	-0.06	0.83	-0.07	-0.25	-0.95		0.17		0.73	-0.17	-0.47	0.78	-0.39		0.62		-0.48	-0.5	-1.56	0.03	0.11	-0.11	0.37	0.56	-0.05	-0.72	0.68	0.74	-0.95	-1.47	-0.57	-1.25	-0.94	0.69	0.27	0.76	0.31	0.12	-1.24	-0.37	-1	-0.46	1.09	-1.37
GENE4341X	IMAGE:884440	223735 Homo sapiens cDNA FLJ30478 fis, clone BRAWH1000167 Hs.298258 AA629688	1	-0.54	0.49	-0.32	-0.2	-0.15	-0.13	-0.45	-0.76		-0.11	-1.08	-0.37	-0.56	-0.17	-0.95		0.37	-0.89	0.19	-0.53	-1.01	-0.26	-0.74	-0.93	-0.09	0.04	0.32	-0.69	-0.59	-0.27	-0.27	-1.37	-0.07	-0.42	-0.56	0	0.07	-0.41	0.34	-0.07	-0.31	-0.33	0.11	-0.6		-0.16
GENE3723X	IMAGE:147925	220107 Homo sapiens cDNA FLJ30478 fis, clone BRAWH1000167 Hs.298258 R81987	1	-0.67	0.89	0.16	-0.17	-0.95	-0.16	-0.45		-0.91	0.12		-1.54	-1.54		-1.92		-1.06	-0.46	-0.19	-0.9	-1.14	-0.07	-0.4	-0.25	-0.33	-1.9	0	-0.58	-0.61	-0.79	-1.13	-2.19	-0.48	-0.7	-0.46	-0.54	0.34	-0.86	-0.01	0	-0.19	0.2	-0.06	-0.45		0.04
GENE1786X	IMAGE:325128	110271 LPXN leupaxin Hs.49587 W48762	1	0.11	-0.06	0.29	-1.06	0.02	-0.7	-0.07	-0.78	0.25	-0.27	-0.47	0.15	-0.3	-0.72	-0.36	-1.5	0.16	-0.13	0.35	-0.03	-0.06	0.75	-0.19	-0.62	-0.03	-0.59	0.14	-0.5	-0.41	-0.18	-0.96	-0.25	-0.46	0.46	-0.37	-0.81	-0.52	-0.2	-0.6	0.08	0.28	-0.12	-0.05	-0.22	0.24	-0.65
GENE3845X	IMAGE:50578	220855 FREQ frequenin homolog (Drosophila) Hs.301760 H16821	1	0.46	0.32	-0.39	-1.35	-0.94	0.03	-0.86		0.47	1.3	-0.25	0.31	-0.12	0.55	-0.52		-0.1	0.42		-0.39	-0.17	-0.07	-0.14	0.21	0.11	0.04	-0.52	0.59	0.61	0.99	-0.27	0.01	-0.12	-0.43	0.21	0.09	-0.5	0.65	-0.07	0.36	0.12			0.03	1.63	-2.17
GENE4918X	IMAGE:1534173	226907 FREQ frequenin homolog (Drosophila) Hs.301760 AA918755	1	0.85	0.78	-0.1	-1.36	-1.06	0.1	0.66	0.12	0.8	1.86	0.02		0.84	0.13	-1.04	-1.36	-0.23	0.74	0.42	-0.4	0.38	-0.84	-0.03	0.01	0.54	-0.21	-0.04	0.61	-0.31	0.28	0.37	-0.61	-0.5	1.13	0.87	0.93	-0.19	0.66	-0.12	-0.01	-0.18	-0.09	-0.37	0.33	1.99	-0.76
GENE3455X	IMAGE:796468	119942 DKFZp547N157 hypothetical protein DKFZp547N157 Hs.45008 AA460340	1	0.29	0.08	0.1	-1.43	-0.1	-0.26	-0.58		-0.29	1.48	0.69	0.28	0.51	-0.38	-0.37		-0.88	0.45	0.1	-0.34	0.38	0.33	-0.25	0.1	0.24	0.38	0.6	0.62	0.07	-0.28	-0.39	-0.41	-0.02	0.15	0.06	0.23	0.5	0.51	-0.34	0.14	0.52	0.1	-0.64	-0.21	0.83	-0.85
GENE1638X	IMAGE:49318	109386 AXL AXL receptor tyrosine kinase Hs.83341 H15336	1	-0.38	-0.15	-0.19	-0.54	-0.39	-0.18	-1.08	0.37	0.64	-0.05	0.98	-0.06	-0.21	-0.23	0.24	-2.36	0.37	0.94	1.59	-0.48	-0.68	-0.38	-0.38	-0.24	-0.1	0.18	-0.32	-0.35	0.43	0.64	-0.06	0.56	-0.79	1.45	0.5	-0.93	-0.54	0	-0.23	-0.35	-0.26	-0.1	-0.42	-0.25	0.29	-0.33
GENE4809X	IMAGE:825223	226291 SMAP31 hypothetical protein SMAP31 Hs.13775 AA504137	1	0.36		-0.2	0.46	-0.27	-0.5	-0.77	-0.22	2.11	-1.51		-1.5	-1.59	-1.63			0.18	-1.45	-1.54			-1.74	-0.68	-0.59	-0.27	0.4	-1.25	-0.72	-0.09	-1.25	-1.14	-0.58		0.24	1.05	0.12	-0.09	-0.84	0.78	1.89		-1.79	0.56	-0.21	-1.01	-1.97
GENE1171X	IMAGE:594850	106815 FLJ11006 hypothetical protein FLJ11006 Hs.49344 AA171718	1	-0.28			-0.01	-0.08	-0.04	-0.53		-0.14	0.42		1.22	0.34	-0.03	-0.69		-0.33	-0.73		0.34	-0.46		0.01	0.18	-0.34	0.08	-0.21	0.28	-0.01	-0.51	-1.36	-0.66	-0.42	-0.66	-0.88	0.22	-0.73	-0.1	-0.79	-0.14	-0.66	0.07	0.63	0.82	-0.45	-0.18
GENE1640X	IMAGE:280339	109393 Homo sapiens mRNA full length insert cDNA clone EUROIMAGE 1090207 Hs.349207 N49263	1	-0.26		-0.16	-0.03	0.25	0.04	0.16	2.42		0.68	0.05	0.1	-0.29	-0.83	0.24		0.32	-0.37	0.12	0.17	0.49	-0.71		-0.06	-0.54	0.35	-0.09	0.06	0.78	0.02	0.14	-0.41	0.92	0.87	-0.41		0.81	-0.01		-0.5	-0.38	0.9	0.26	0.23		0.15
GENE821X	IMAGE:49389	104731 STX1A syntaxin 1A (brain) Hs.75671 H15539	1	0.01	-0.25	-0.55	0.13	-1.27	-0.1	-0.23	0.35	0.11	-0.01		0.46	-0.01	-0.18	-0.56	0.48	0.05	0.1		0.56	-0.47	-0.39	-0.25	-0.29		0.18	0.47	-0.01	-0.12	-0.21	0.08	0.13	0.29	0.62	0.02	0.77	1.54	0.17	-0.29	0.32	0.56	0.54	0.16	0	-0.26	0.07
GENE4505X	IMAGE:815556	224593 FLJ10430 hypothetical protein FLJ10430 Hs.6823 AA456821	1	-0.37	-1.3	-1.69	-0.22	-1.31	0.09	-0.94	2.45	1.07	-0.21		2.05	-0.46	0.12	-0.16	-0.92	-1.05	1.25	-0.42	0.94	1.29	0.93	1.11	0.4	1.54	1.38	2.59	2	-0.31	-0.23	-0.86	2.31	-0.9	-2.45	-0.44	0.45	2.1	1.65	-1.09	-0.57	-0.49	2.01	-0.6	1.15	-0.19	1.45
GENE6600X	IMAGE:130843	99485 MAPK8IP2 **mitogen-activated protein kinase 8 interacting protein 2 Hs.80545 R22305	1	-0.21		0.35	-0.77	-0.06	-0.33	0.89	-0.47	0.35	-1	-0.01	1.51	0.2	-0.08	-0.17		0.01		0.41	1.03	-0.01	-0.5	0.22	0.3	0.18	-0.08	0.14	0.01	0.12	-0.4	-0.31	0.82	-0.11	0.2	-0.21	-0.05	-0.08	0.54	0.1	-0.08	0.16	0.65	-0.44	-0.15	-0.06
GENE6137X	IMAGE:1858892	317397 MGC4825 hypothetical protein MGC4825 Hs.40065 AI199007	1	0.02	-0.11	0.22	-0.14	0.14	0.03	1.51	1.83	0.46	0.7	1.72	4.07	0.62	0.1	-0.24	0.92	0.3	-0.01	0.74	-0.17	-0.03	-1.34	0.24		-0.05	0.41	0.07	0.23	-0.49		0.3	0.14	-0.42	-0.26	-0.52	-0.67	0	0.54	-0.12	-0.32	-0.19	-0.09	-0.05	0.65	-0.43	0.5
GENE2812X	IMAGE:46477	116182 DKFZp547D155 hypothetical protein DKFZp547D155 Hs.193235 H09966	1	-0.23		-0.21	0.5	-0.61	0.39	0.65	6.42	1.41	-0.63		5.36	0.35	1.45	0.59	-0.59	-0.17	-2.26	-0.44	-1.14	-0.67	-0.47	0.73	1.16	0.42	0.36	-0.16	0.39	-0.72		0.33	0.17	-0.68	-0.16	-0.16	0.12	-0.27	0.47	0.06	-0.28	-0.95	-0.32	-0.4	-0.83	-0.62	-1.07
GENE3578X	IMAGE:773142	120669 MGC2827 hypothetical protein MGC2827 Hs.8035 AA425375	1	0.16	-0.1	-0.28	0.1	0.89	1.33	-0.21	1.29	0.64	-0.91	1.08	2.63	-0.19	0.23	1.52	-0.44	0	0.16		-0.26	-0.32	-0.53		-0.32	0.43	0.67	0.45	0.19	-0.11	0.29	-0.59	0.51	-0.47	0.66	-0.39		0.48	-0.11	-0.05	-0.55	0.07	-0.05	0.05	-0.27	-0.89	0.33
GENE5003X	IMAGE:128020	247888	1	0.12		0.57	-1.1	0.47	-0.68	0.2	1.89	0.63	-0.63	0.75	1.65	0.17		0.45	-0.89	0.43		-1.26	0.28	-0.11	0.45	-0.46	-0.69	0.4	-0.21	0.04	-0.07	0.03	0.2	0.05	0.5	-0.23	-1.02	-0.43		0.12	0.13	0.05	0.61	0.36	0.22	0.04	0.19	0.8	0.3
GENE343X	IMAGE:824659	101997 ICA1 islet cell autoantigen 1 (69kD) Hs.167927 AA482169	1	-0.08	0.03	-0.31	0.38	-0.4	0.16	-0.5	1.91	0.28	0.69	0.95	0.01	-0.39	1.13	1.89	-0.65	0.18	-0.76	-0.31	-0.05	0.72	-0.76	-0.85	-0.33	-0.95	-0.43	-0.34	-0.11	-0.48	0.02	0.26	0.3	-0.07	-2.37	0.6	0.1	-0.76	-0.87	-1	-0.55	0.43	-1.24	0.9	-0.23	-0.79	0.78
GENE5136X	IMAGE:731129	307553 ICA1 islet cell autoantigen 1 (69kD) Hs.167927 AA417093	1	-0.52	-0.61	-0.66	0.44	-0.43	0.26	-0.53	2.81	0.08	-0.56	1	-0.14	-0.67	1.4	1.34	-0.84	0.13	-0.43	-0.48	-0.25	0.3	0	-1.13	-0.62	-0.85	0.34	-0.48	-0.88	-0.38	-0.15	0.04	0.28	0.01	-2.42	0.32	0.1	-0.62	-0.97	-0.78	-0.78	0.63	-1.24	0.77	0.14	-1.07	0.44
GENE3129X	IMAGE:131452	117937 KIAA1102 KIAA1102 protein Hs.202949 R23270	1	0.25	-0.33	-1.27	-0.98	-0.28	-0.07	0.6	0.65		-0.25	-0.72	-0.64	-1.42	-0.73	-0.84	0.56	1.16	-0.32	0.76	-0.87	-0.31	-0.39	-1.24	-0.63	-1.22	0.29	-2.01	-0.17	-1.02	-0.25	0.89	-1.43	0.46	-1.9	1.16	-0.82	-0.8	-0.89	-0.27		-0.27	-0.51	1.22	-0.14	-0.68	-1.44
GENE1503X	IMAGE:626390	108677 KIAA1102 KIAA1102 protein Hs.202949 AA188890	1	0.35	-0.25	-0.04		-0.43	0.28	-0.74	1.16	0.01	-0.58		0.48	-0.1	0.33	-0.45	0.05	0.94	-1.72		0.32	-0.45	0.34		0.29		0.03	-0.48	-0.43	-0.48	-0.58	0.98	-0.67	0.24	-1.48	0.77		-0.32	0.04	-0.38	-0.16	0.59	0.13	0.88	-0.02	0.14	-0.84
GENE1666X	IMAGE:950479	109570 Homo sapiens mRNA; cDNA DKFZp564A026 (from clone DKFZp564A026) Hs.66762 AA599122	1	0.05	0.52	0.55	-0.21	-0.36	1.14	-1.43	1.21	1.55	0.78	1.37		-0.15	0.45	0.8		1.03	-0.81	-0.02	0.38	0.3	0.25	-1.18	0.12	-0.81	-0.41	0.39	0.06	-0.58	-0.11	0.37	-1.31	0	-2.25	-0.45	-0.22	-0.48	-0.69	-0.74	0.48	-1.12	0.67	0.03	-0.18	1.39	-1.43
GENE609X	IMAGE:788617	103439 LOC91689 hypothetical gene supported by AL449243 Hs.306083 AA449821	1	0.06	1.3	1.93	-0.96	0.55	1.04	0.07	1.67	0.1	-0.74	-0.85	-0.09	-0.07	-0.32	-0.64	-0.78	0.15		-0.2	-0.25	0.06	-0.3	-1.24	-0.61	-0.58	-0.6	-0.34	0	-0.78	-0.85		-0.08	0.44	-0.78	0.07	-0.24	-0.38	-0.66	0	-0.03	-0.43	-0.11	0.13	0.59		-0.9
GENE186X	IMAGE:178999	101100 **ESTs Hs.21558 H48165	1	-0.38		-0.18	-0.34	0.01	1.55		-0.45		-0.69	-0.17	0.17	0.13	-0.81	0.19		-0.37	-0.6	-0.07	0.29	0.31		0.39	-0.09	-0.13	-0.4	0.65		0.42	0.03	-0.77	0.15	-0.1	-0.6			0.13	0.13	-0.18	-0.14	-0.77	-0.08	-0.05	0.06	0.53	-0.74
GENE3130X	IMAGE:85514	117940 SERPINA7 **serine (or cysteine) proteinase inhibitor, clade A (alpha-1 antiproteinase, antitrypsin), member 7 Hs.76838 T72171	1	0.15		-0.91		-0.22	0.52	-0.87		0.3	-1.19	-1.44	0.21	0.73	0.45	0.78		0.4		-0.51	-0.07	-0.53	1.41	0.77	0.51	1	0.24	1.11	-0.46	0.75	1.05	-0.67	-0.64	-0.05	-0.4	-0.4	0.39	0.52	0.21	-1.36	0.62	-0.8	-0.36	0.17	-0.26	-0.7	-0.79
GENE6639X	IMAGE:153541	99694 EPHB1 EphB1 Hs.78436 AI732309	1	-0.31	0.37	0.18	-0.52	-0.18	-0.3	0.41		-0.14	1.64		1.03	-0.5	-0.89	0.62	-1.55	-0.16	1.64	0.68	0.99	1.05	1.16	0.03	-0.07	-0.3	-0.7	0.08	-0.15	-0.63	-0.47	0.16	0.08	0.63	-1.08	-0.46	-0.61	-1.02	-0.49	-0.32	-0.22	0.79	-0.22	0.53	-0.05	-0.19	0.09
GENE4238X	IMAGE:23443	223078 SYT13 synaptotagmin XIII Hs.12365 R38678	1				2.49	-1.98	-2.13	-0.15	-0.92	-1.91	-0.03	0.13	-1.78	-2.37	-1.72	-2.36	3.41	2.65	2.74	1.6	0.07	0.69		-1.94	-0.76	-2.21	-2.51	-1.45		-0.1	0.34	-0.62	-2.71		-2.57	-2.98	-0.92	-0.3	-0.19	-0.25	0.88	1.55		1.37	1.41		1.23
GENE1328X	IMAGE:75923	107726 ZNF32 zinc finger protein 32 (KOX 30) Hs.78765 T47229	1	0.23	0.37	0.12	0.6	-1.42	0.51	0.42	1.36	0.4	-0.16	1.24	0.24	0.12	-0.32	-0.9	-1.78	0.3	0.14	-0.04	-0.21	0.08	-0.53	-0.4	-0.44	-0.22	0.25	0.05	-0.58	0.07	-0.11	-0.38	0.16	-0.23	0.62	-0.06	-0.92	-0.65	-0.03	0.01	-0.41	-0.16	0.54	-0.32	-0.41	-0.05	0.28
GENE6154X	IMAGE:198855	317666 DDX17 DEAD/H (Asp-Glu-Ala-Asp/His) box polypeptide 17 (72kD) Hs.349121 H82870	1	0.27	-0.43	-0.11	-0.14	-1.76	-0.12	0.46	0.3	-0.24	-0.72	1.04	-0.09	-0.93	0.11	0.05	0.32	-0.36	0.13	0.66	-0.01	0.17	0.79	-0.29	-0.49	-0.09	-0.54	0.18	-0.41	-1.02	-0.91	0.33	0.05	-0.86	-0.77	-0.65	0.04	0.75	-0.06	-0.58	0.02	0.59	-0.13	1.27	0.68	-0.31	0.52
GENE115X	IMAGE:345118	100612 Homo sapiens cDNA: FLJ21447 fis, clone COL04468 Hs.44241 W72920	1	0.53	0.22	0.67	-1.62	0.22	-0.26	0.63		1.71	0.43	1.38	2.58	0.06	0.6	0.98	0.15	0.37		-0.29	-0.07	-0.13	0.94	0	0.08	0.46	0.43	0.75	0.92	-0.25	-0.4	-0.81	-0.09	0.36	-1.44	0.76	-0.1	0.85	-0.25	-0.71	-0.06	-0.6	-0.42	1.03	1.87		-1.98
GENE6108X	IMAGE:1849729	316867 SNTB1 syntrophin, beta 1 (dystrophin-associated protein A1, 59kD, basic component 1) Hs.95011 AI248807	1	0.31	0.37	0.86	-2.27	-0.04	-0.13	1.42	0.27	2.71	0.36	2.51	3.98	-1.14	0.62	1.66	0.84	0.12	0.59	-0.55	-0.39	-0.88	2.41	0.26	-0.09	-0.63	0.59	1.33	1.43	-0.59	-1.1	-0.21	0.58	0.95	-1.36	1.13	-1.18	1.56	-1.05	-0.73	0.5	1.1	-1.11		2.67	-0.52	-1.96
GENE4429X	IMAGE:347331	224183 Homo sapiens cDNA: FLJ21447 fis, clone COL04468 Hs.44241 W81043	1	-0.2	-0.22	0.19	-1.34	0.13	-0.87	0.97	-0.22	1.66	0.35	1.44	2.3	-1.61	0.01	0.85		-0.2		-0.43	-0.65	-1.14	2.17	-0.05	-0.19	-0.78	0.25	1.22	0.73	-0.79	-1.35	-0.5	-0.19	0.44	-1.21	0.92		1.3	-0.58	-0.75	0.04	-0.03	-0.68	1.01	1.98	-1.06	-1.55
GENE1115X	IMAGE:242037	106491 C20orf16 chromosome 20 open reading frame 16 Hs.92374 H93328	1	0	-0.11	-0.71	-0.21		-0.56	0.11	0.75	0.89		1.95	0.2	-0.18	-0.37	-0.21	0.65	-0.5	0.53	0.22	0.08	-0.2	-0.02	-0.18	-0.09	-0.82	-0.07	-0.52	0.54	0.05	-0.15	-0.36	-0.87	-0.38	-1.45	-0.82	0.48	1.14	-0.37	-0.37	0.15	-0.21	0.08	0.35	0.8	-0.28
GENE741X	IMAGE:307050	104212 PPARGC1 peroxisome proliferative activated receptor, gamma, coactivator 1 Hs.198468 N89673	1	-0.2	-0.11	0.29	0.23	-0.42	-0.66	0.31	1.23		-0.21		0.07	-1.47	-0.79	0.92	0.53	-0.73	-0.98	-0.63	-0.46		1.49	-0.15	-0.13	-0.96	0.41	-0.02	-0.33	-0.48	-1.04	1.4	-0.09	1.38	-1.01	-0.53	-0.51	-0.9	-0.86	-0.54	0.6	-0.02	-0.05	0.75	0.7	-0.43
GENE378X	IMAGE:856167	102223 TARS threonyl-tRNA synthetase Hs.84131 AA630628	1	-0.13	0.06	0.01	0.58		-0.44	-0.46	1.48	-0.21	0.32	-0.75	0.49	0.28	-0.62	0.12	0.78	-0.16	0.07	-0.36	0	-0.3	0.07	-0.77	0.08	0.01	0.13		0.45	-0.01	-0.07	-0.22	-0.33	-0.23	-0.04	-0.45	0.16	-0.34	-0.1	-0.85	0.17	-0.12	0.17	-0.04	0.24	0.26
GENE3577X	IMAGE:41192	120668 ESTs Hs.26507 R56134	1	-0.17	-0.47	0	-1.09	-0.05	-0.57	-0.02	0.01	-0.32	-0.64	0.26	-0.08	-0.02	0.38	-0.06		0.28	-0.23	-0.33	-0.11	-0.35	-0.37	-0.04	-0.06	-0.03	0.37	-0.01	0.38		0.12	-0.18	-0.14	-0.11	0.36	0.22	-0.01	0.07	0.64	-0.48	0.01	-0.19	-0.08	-0.12	-0.12	0.08
GENE1047X	IMAGE:263014	106064 GSTT1 glutathione S-transferase theta 1 Hs.77490 H99813	1	-1.83	-4.44	-3.16	2.65	-3.03	3.05	2.54	3.55	2.81	-3.59	-3	-0.38	2.01	-1.39	-3.11	-4.04	2.36	-3.92	-2.28	2.66	1.61	-1.08	-0.63	-0.96	1.6	-3.18	-0.72	-0.6	-1.36	-1.94	1.29	-1.96	-0.5	-2.77	1.55	2.53	1.2	1.44	1.77	2.48	-1.77	-0.46	-1.57	-1.75	1.86	1.02
GENE5783X	IMAGE:788223	312536 DJ971N18.2 hypothetical protein Hs.169358 AA453440	1	-0.38	-0.06	-0.19		0.15	-0.26	-0.13			0.06	0.31	0.98	0.24	1.68	2.56	-0.92	0.74		0.42	-0.55	-0.12	-1.05	-0.83	0.4	-0.1		-0.17	-0.05	-0.4	-0.42	-0.95	-0.95	-0.68	-0.18	0.02	-0.4	-0.27	-0.38	-0.9	-0.13	-0.38	-0.45	0.01	-0.06	0.88	0.73
GENE2251X	IMAGE:785967	112959 EPB41L2 erythrocyte membrane protein band 4.1-like 2 Hs.7857 AA448595	1	0.05	-0.96	-0.68	0.67	-0.72	-0.57	-0.69	-1.03	-0.31	1.07	-0.88	-0.37	-1.11	0.99	1.04	0.13	0.44	0.53	-0.48	-0.54	-0.58	-0.42	-0.92	-0.21	0.19	1.16	1.25	0.2	-0.02	-0.56	-1.41	-0.97	0.32	-1.22	-0.44	0.11	0.35	1.11	-0.51	0.56	0.6	0.44	1.29	0.38	0.3	1.35
GENE6323X	IMAGE:1849100	319852 SIGLEC7 sialic acid binding Ig-like lectin 7 Hs.274470 AI247571	1	-0.06		-0.21		-0.21	-0.17	-0.23	-0.32	0.32	1.03		0.1	0.1	0.54	0.52	-0.81	0.41			-0.41	-0.46	-0.36	-0.36	-0.36	-0.32	0.2	0.21	0.02	-0.38	-0.43	0.09	0.26	-0.14	-0.35	-0.08	-0.07	0.29	-0.31	0.18	-0.22	-0.06	0.24		0.18	0.21
GENE3403X	IMAGE:86220	119647 TDO2 tryptophan 2,3-dioxygenase Hs.183671 T72398	1	-0.05		-0.36		0.18	-0.2	0.3	-0.61	-0.56	2.11	0.03	-0.12	-0.18	0.14	-0.23	0.11	0.26		-0.17	-0.3	-0.18	-0.16		-0.18	-0.19	-0.33	0.43	-0.43	-0.43	-0.36	0.52	-0.14	0.1	-0.64	-0.22	-0.2	0.01	-0.02	0.18	-0.58	-0.25	0.12	-0.35	0.43	0.47
GENE1699X	IMAGE:79254	109789 P5-1 MHC class I region ORF Hs.1845 T58146	1	1.01	0.53	0.52	1.11	-0.45	-0.82	1.14	0.23	0.11	2.39	1.04	0.59		-0.89	0.15	1.57	0.73	2.27	-0.36	-3.7	0.48	-2.12	-2.03	-1.52	-1.6	0.11	-1.61	-0.14	0.63	-0.31	0.89	1.25	0.47	0.74	0.56	-0.35	-0.48	0.02	0.15	-0.16	0.1	0.68	0.92	0.05	0.03	-0.15
GENE479X	IMAGE:254328	102719 Homo sapiens mRNA; cDNA DKFZp761G1111 (from clone DKFZp761G1111) Hs.274293 N22272	1	-0.68	-0.46	0.91		-1.85	-0.56	0.9	-0.03	-0.5	-0.43		-0.6	0.17	0.43	0.31	1.05	0.75	0.69	-0.4	0.28	-0.92	-0.97	-0.68	-0.45			-0.64	-0.03	-0.29		0.91	-0.17	0.57	0.71	0.72	0.06	-0.28	-0.64		0.56	0.04	0.31	1.38	0.14		-0.04
GENE2750X	IMAGE:244189	115851 FOLH1 folate hydrolase (prostate-specific membrane antigen) 1 Hs.1915 N52474	1	-0.28	-0.39	-0.27	0.25	-0.15	-0.15	0.78	0.07	0.11	-0.87	-1.33	0.33	-0.16	-0.02	-0.12		0.07		0.32	0.05	0.43	0.05		0.46	-0.09	0.71	-0.39	0.18	0.12	-1.74		0.09	0.22	0	-0.07	0.34	-0.19	0.32	0.12	0	0.19	0.23	1.44	0.53	0.24	-0.28
GENE1729X	IMAGE:814054	109927 KIAA0040 KIAA0040 gene product Hs.158282 AA465478	1	-0.2	0.02	-0.46		-0.6	-0.03	1.35	-0.87	-0.34	0.33	-0.56	-0.07	-0.36	-0.46	-0.08	0.07	0.33	0.59	0.54	-0.2	-0.51	-0.77	0.11		-0.39	1.18	-0.73	-0.55	-0.35	-1.45	-0.1	-0.3	0.98	-0.47	-0.21	0.26	-0.62	0.07	-0.39	0.06	-0.17	-0.25	0.15	0.61	-0.45	-0.39
GENE1805X	IMAGE:588608	110384 Homo sapiens cDNA FLJ12317 fis, clone MAMMA1002058 Hs.288464 AA146979	1	-0.09	-0.42	-0.1	-0.37		-0.74	-1.06		0.45	0.42	-1.95	-0.04	-0.66	0.39	-0.23	0.78	1.62	0.28	0.46	-0.83	-0.98	-0.31	0.74	0.19	0.26	0.23	0.79	0.01	0.34	-0.16	0.27	0.7	0.21	0.61	0.81	-0.31	-0.41	0.9	-0.01	-0.3	0.07	-0.25	0.25	1.16	0.36	-0.62
GENE1357X	IMAGE:308216	107863 STE sulfotransferase, estrogen-preferring Hs.54576 N92404	1	-0.48	-1.39	-0.47		-0.47	-0.93	-0.37	0.21		-0.66		-0.59	-0.65	2.05	-0.51		-0.13	0.87	0.23	-0.66	1.79	-0.06	0.16	-0.08	-0.26	0.21	-0.36	-0.79	-1.01	-0.83	0.21	2.48	-0.23	-0.46	-0.41	-0.86	-1	-0.54	-0.89	0.59	-0.73	-0.51	1.12	-0.36	-0.14
GENE1444X	IMAGE:785595	108388 STE sulfotransferase, estrogen-preferring Hs.54576 AA448993	1	-0.18	-0.09	-0.14	0.81	-0.29	0.04	-0.33	-0.49	-0.4	-0.82	-0.59	0.07	-0.07	1.94	-0.39	-0.2	-0.33	0.4	-0.08	-0.51	1.24	0.68	-0.51	0.29	0.01	0.17	0.31	-0.23	-0.1	-0.52	0.09	2.09	-0.34	-0.14	-0.07	-0.44	-0.49	-0.2	-0.16	0.16	-0.59	-0.25	0.38	0.17	-0.18	-0.4
GENE304X	IMAGE:588113	101801 Homo sapiens cDNA: FLJ21751 fis, clone COLF6311, highly similar to AF147791 Homo sapiens mucin 11 (MUC11) mRNA Hs.321571 AA132280	1	0.13	-0.22	0.28		-0.85	-0.3	-0.73					0.68	0.05	0.48	0.12		0.82			0.81	2.91	0.52	-0.29	-0.03	-0.17	-0.27	0.6	0.39	-0.28	0.53	0.36	1.28	-0.39	0.71	-0.53		-0.03	0.33	-0.07	0.66	-0.86	0.89	0.41	-0.02		-0.01
GENE5695X	IMAGE:361611	311498 TOB1 transducer of ERBB2, 1 Hs.178137 W96163	1	0.28	0.56	0.91	0.23	-0.42	-0.47	-0.25	-0.22	0.35	0.61	0.14	-0.06	-0.43	0.59	-0.46	0.9	1.18	2.05	-0.01	1.12	1.4	-0.07	0.1	0.05	-0.08	0.96	0.05	-0.21	-0.13	0.04	0.23	0.87	-0.02	-0.47	-0.23	-0.29	0.62	-0.6	-0.38	0.94	0.84	-0.48	0.34	-0.13	-1.06	-1.11
GENE117X	IMAGE:1132429	100639 TOB1 **transducer of ERBB2, 1 Hs.178137 AA631929	1	-0.02	0.2	0.69	0.03	0.05	-0.51	0.52	-0.18	0.14	0.17	-0.06	-0.46	-0.11	-0.04	-0.69	0.51	0.97	1.93	0.31	0.39	1.1	-0.67	0.62	0.27	-0.26	1.11	-0.23	-0.3	0.01	-0.13	-0.44	0.57	-0.25	-0.76	-0.38	-0.56	-0.15	-0.24	-0.39	0.86	-0.07	-0.28	0.13	-0.32	-1.69	-1.18
GENE278X	IMAGE:271441	101660 FLJ23306 hypothetical protein FLJ23306 Hs.5890 N34799	1	0.12		0.05	-0.43	0.24	-0.51	0.45	1.52	1.21	1.19	-0.38	-0.99	-0.58	-0.52	-0.6	-0.31	0.9	0	-0.08	0.98	0.74	-0.62	0.59	-0.41	0.06	0.78	-0.72	-0.43	-0.5	-0.74	0.37	0.32	0.02	-3.84	-0.34	-2.56	-0.9	-0.31	0.27	0.49	0.06	-0.15	-0.22	-0.15	-0.48	-1.1
GENE2853X	IMAGE:229667	116406 GSTM3 glutathione S-transferase M3 (brain) Hs.2006 H67342	1	-0.66	-0.65	-0.11	0.05	0.29	-0.51	-0.24	-0.44	0.31	0.75		-0.64	0.77	-0.14	-0.98	0.33	0.88	0.41		0.25	-0.06	-0.76	0.15	0.24	0.68	0.29		-0.02	-0.05	0.01	-1.49	0.26	0.31	-1.66	-0.54	0.43	-0.41	-0.45	-0.62	0.7	0.97	0.39	-0.18	-0.19	-0.35	0.42
GENE1890X	IMAGE:141854	110896 SPRY4 sprouty homolog 4 (Drosophila) Hs.285814 R70506	1	-0.19	-0.2	0.56	-1.16	-0.59	-1.66	-0.97	-0.62	0.66	0.18	-0.53	-0.51	0.13	-0.16	-0.9	-0.54	1.4	0.99	1.63	0.81	1.6	-0.06	0.75	0.32	0.15	0.42	-0.58	0.32	-0.67	-0.33	-0.85	-0.71	0.71	-0.54	0.16	0.51	-0.22	-0.49	0.15	-0.19	-0.48	0.7	0.24	0.15	-0.95	0.12
GENE319X	IMAGE:220376	101875 TOP1 topoisomerase (DNA) I Hs.317 H86813	1	-0.46	-0.04	0.55	-0.99	-0.53	-2.85	-1.17	-0.17	1.15	0.62		-0.25	0.55	0.44	-0.43		1.27	0.09		1.16	2.1	0.27	0.43	0.39	-0.03	-0.32	-0.88	0.41	-0.66	0.73	-0.7	-0.91	1.28	-0.64	0.15	1.01	0.39	-0.36	0.49	0.67	-0.18	0.46	0.83	-0.05	-0.7	0.66
GENE6316X	IMAGE:82434	319772 EEF1G eukaryotic translation elongation factor 1 gamma Hs.2186 T69164	1	-0.39	0.14	0.42	-0.76	-0.51	-1.56	-1.45		1.23	1.01	0.6	-0.46	0	0.3	-0.45	0.06	1.1	1.15	1.52	0.68	2	0.44	0.25	-0.1	-0.2	0.01	-0.9	-0.08	-0.69	0.45	-1.02	-0.94	1.19	-0.83	0.17	0.69	-0.03	-0.81	0.23	0.34	-0.26	0.48	0.67	0.24	-0.63	0.58
GENE1114X	IMAGE:510273	106486 **Homo sapiens cDNA: FLJ23538 fis, clone LNG08010, highly similar to BETA2 Human MEN1 region clone epsilon/beta mRNA Hs.240443 AA053165	1	-0.24	0.45	0.89	-0.24	-0.48	-2.15	-0.28	-0.07	0.27	-0.16	-0.53	-0.11	-0.46	0.44	-0.4	0.1	0.66	0.51	0.43	0.78	1.08	0.54	-0.11	-0.87	-0.66	-0.26	-0.52	-0.49	-0.21	0.15	-0.79	-0.6	0.94	-1.48	-0.32	0.21	-0.36	-0.74	0.47	0	-0.7	0.27	0.61	0.13	-0.98	0.27
GENE5894X	IMAGE:2310335	313946 HSPA6 heat shock 70kD protein 6 (HSP70B') Hs.3268 AI654494	1	-0.37	-0.83	-0.91	-0.58	0.58	-1.19	0.4	0.28	2.05	-0.61		-0.14	-1.01	0.7	-1.03	3.03	-0.55	0.38		-0.68	-0.45		-0.63		-1.1	-0.06	-0.75		-1.03	-0.9	-0.84	-0.1	-0.95	-1.44	0.34	0.64	0.36	-0.61	-0.39	-0.5	0.03	-0.97	0.02	0.05
GENE2121X	IMAGE:472186	112273 RAB32 RAB32, member RAS oncogene family Hs.32217 AA036761	1	1.1	0.82	0.17	-0.18	-0.48	0.77	-0.07	-0.01	0.29	-0.12	0.97	0.26	-0.95	-0.74	-0.61	-0.9	-0.41	0.25	0.37	-0.11	0.56	0.49	-0.35	-1.21	-0.2	-0.87	-0.21	-0.66	-1.18	-1.22	-1.68	-0.92	-1.59	0.58	-1.25	-0.4	-0.3	0.14	-0.42	1.09	-0.01	1.21	-1.35	-1.04	0.35	-0.79
GENE1652X	IMAGE:325513	109506 EST, Moderately similar to S113_HUMAN S100 CALCIUM-BINDING PROTEIN A13 [H.sapiens] Hs.103092 W52248	1	0.19	-0.28	-1.15	0.51	0.35	0.45	-0.5	1.6	0.14		0.22	-0.13	1.05	-1.54	-2.13	-1.27	0.66	0.94	0.47	1.09	-0.05	-0.06	0.98	0.01	-0.93	0.25	0.05	-0.65	-0.29	0.18	-0.41	0.06	0.09	0.21	-0.12	0.31	1.48	0.49	0.2	-0.26	-1.23	-1.03	-0.61	-0.76	-0.03	-0.03
GENE2321X	IMAGE:530035	113334 S100A13 S100 calcium binding protein A13 Hs.14331 AA070489	1	0.17	-0.32	-1.07	0.33	-0.13	0.76	-0.5	1.55	-0.17	-0.19	-0.23	0.05	1.05	-1.2	-1.41	-1	0.69	0.81	0.23	0.99	-0.31	-0.14	0.88	-0.06	-0.81		0.19	-0.47	-0.48	0.01	-0.66	0.3	0.07	0.21	0.08	0.23	1.11	0.37	-0.27	-0.29	-1.02	-1	-0.4	-0.4	-0.02	0.07
GENE1080X	IMAGE:80484	106252 P8 p8 protein (candidate of metastasis 1) Hs.8603 T64469	1	0.14	0.09	-0.79	-0.94	-0.44	-0.21	-0.93	0.88	0.48	0.57	0.07	1.04	-0.95	-1.17	-0.94	-0.22	0.26	-0.84	-0.61	0.14	-0.14		0.45	-0.57	-0.07	-0.43		-0.08	0.55	0.72	1.52	1.7	-0.58	-0.47		-0.38	-0.46	-0.28	-0.6	-0.35	-0.26	0.89	-0.49	-0.76	-1.79	-1.32
GENE5473X	IMAGE:1681421	309804 EGFL3 EGF-like-domain, multiple 3 Hs.56186 AI084613	1	0.23	-0.1	0.55	-1.32	-0.46	-1	-0.04	-1.18	0.24	0.5	0.67	-0.15	-0.78	-0.58	-0.98	-0.07	0.01	0.28		0.53	0.11	0.36	0.85	0.01		-0.36	-0.19	0.75	-0.03	0.4	1.43	0.85	-0.91	0.69	2.14	0.96	0.15	0.25	0.19	0.13	0.54	-0.14	0.32	0.45	-1.43	-0.21
GENE5140X	IMAGE:1561020	307579 ESTs Hs.124863 AA975413	1	0.48	-0.01	0.66	-1.16	-0.89	-0.98	0.07		0.26	0.38	1.06	1.33	-0.21	-0.93	-1.19		-0.13	-0.27	-0.39	0.73	0.13	0.02	0.7	0.15	0.73	0.45	-0.21	1.47	0.84	0.78	1.72	1.25	-0.63	0.6	1.24	1.09	-0.16	0.66	-0.53	-0.01	0.08	0.12	1.25	0.87	-1.36	0.02
GENE5254X	IMAGE:796536	308306 Homo sapiens cDNA FLJ31372 fis, clone NB9N42000281 Hs.89388 AA460263	1	-0.35	-0.33	-0.17	-1.16	-0.88	-0.33	-0.1	-0.13		-0.63		1.33	0.93	1.19			-0.17	0.05	-0.55	-0.67	-0.71	-0.56	1.32	1.63		-0.08	-0.08	0.67	-0.34	-0.38	-0.59	-0.82	-0.66	1.73		0.54		1.76	0.17	-0.27	-0.74	-0.3		-0.62		0.24
GENE5575X	IMAGE:2028135	310437 BICD1 Bicaudal D homolog 1 (Drosophila) Hs.164975 AI356535	1	0.17			0.13	-0.68	0.18	0.15	-0.52	0.06	0.23	-0.1	1.68	0.22	0.37	-0.28	-0.34	0.61	-0.15	0.04	0.39	-0.05	-0.71	0.24	0.18	-0.19	-0.42	0.15	0.31	-0.13		0.17	-0.01	-0.65	0.11	0.36	0.39	0.25	0.49	-0.07	-0.34	0.03	-0.14	-0.19	0.89	-0.36	-0.13
GENE2690X	IMAGE:232887	115472 FLJ14529 hypothetical protein FLJ14529 Hs.334703 H73479	1	0.1	0.23	0.11		-1.36	0.08	0.62	-1.7	-0.33	-0.57	-1.6	1.11	0	0.54	-0.53		-0.35		0.25	-0.18		-0.25	-0.01		-0.24	-0.73	-1.09	0.06	-0.16		0.01	-0.36	-0.45	-0.25	0.19	0.18	-0.12	-0.13	0.39	0.48	0.48	-0.28	0.19	0.21	1.27	0.11
GENE4256X	IMAGE:826994	223240 PLEKHA4 pleckstrin homology domain-containing, family A (phosphoinositide binding specific) member 4 Hs.9469 AA521373	1	0.16	0.11		0.35	-0.4	-0.66	0.56	-0.52	0.22	0.83	0.29	-0.36	-0.23	-0.73	-1.87	-0.01	-0.14	0.23	0.55	-0.42	-0.44	-1.38	-0.47	-0.74	-0.83	-1.18	-0.1	-0.71	0.87	1.19	-0.55		-1.55	0.79	0.64	-0.47	-0.56	-0.01	-0.28	-0.14	0.13	0.23	0.14	0.05	1.1	-1.33
GENE5917X	IMAGE:1866085	314218 FLJ21634 hypothetical protein FLJ21634 Hs.97056 AI272007	1	-0.35	0.12	0.31	0.01	0.91	1.69	0.46	1.99	0.4	1.02	1.65	0.85	-0.32	-1.25	-0.39	-1.19	0.35	-0.24	0.03	0.16	0.04	-1.12	-0.8	0.11	0.48	-0.42	-0.38	-0.39	-0.32	-0.37	-0.87	0.35	-0.28	0.97	-0.38	0.06	-0.74	0.07	-0.56	0.2	0.36	-0.2	0.34	-0.14	-0.31	0.1
GENE1593X	IMAGE:149596	109196 KIAA1530 KIAA1530 protein Hs.191268 H00313	1	-0.22		-0.1		-0.28	-0.29	-0.41	1.61	0.04	0.68		-0.66	-0.42	0	0.7		0.46		0.22	1.66	-0.49	-1.1	-0.71	-0.76		-0.38	-0.57	-0.18	-0.15	0.36	-0.26	-0.04	-0.33	-0.39	-0.59	-0.24	-0.54	-0.96	-0.24	0.35	-1.11	0.07	0.87	0.31	-0.09	-0.39
GENE5413X	IMAGE:151104	309384 CDH5 cadherin 5, type 2, VE-cadherin (vascular epithelium) Hs.76206 H02884	1		0.05	-0.93	0.41	-0.55	-0.15	-0.74		0.25	0.69	0.02	-0.74	-0.71	0.4	0.55	-0.16	-0.21	0.98	1	-0.32	-0.57	-0.65		-0.57	-0.8	-0.39	-0.64	-0.82	-0.56		-0.03	0.02	-0.05	-1.03		-0.82	-0.46	-1.04	-0.23	-0.2	-0.14	-0.29	-0.13	0.03	0.44	-0.22
GENE5100X	IMAGE:1930780	307361 PRAX-1 peripheral benzodiazepine receptor-associated protein 1 Hs.112499 AI333235	1	-0.43	-1.3	-0.82		-0.91	2.36		0.25	-0.96		3.17	-0.84	-1.22	-1.09	-0.33		-0.47		-0.17	-0.83	0.89	0.12	-0.98	-1.48	-0.04	1.56	-0.44	-1.04	-0.37	0.13	0.04	-1.2	-0.27	-0.5	-1.02		-0.86	0.24	-0.59	-0.41	-1.02	-0.82	-0.38	0.05	1.26	-0.79
GENE2042X	IMAGE:727204	111829 LOC51011 CGI-105 protein Hs.279932 AA293836	1	-0.26	-0.43	-0.38		-0.17	1.5	-0.11	0.1		-0.11	2.1	-0.47	-0.27	-0.17	0.5		-0.32		0.64	-0.48	-0.54	-0.79	-0.21	-0.35	0	0.07	-0.7	-0.17		0.2	-0.07	-0.33	-0.66	0.49	-0.46	-0.46	-0.6	-0.61	-0.64	-0.72	-0.91	0.13	0.68	0.21	0.57	-0.43
GENE4055X	IMAGE:379709	222120 KIAA1497 KIAA1497 protein Hs.126085 AA778089	1	-0.53	-0.33	-0.01		-0.62	0.11	-0.83	0.99	1.62	1.14	0.87	0.11	-0.19	0.54	-0.61		-0.1	0.31	1.03	1.12	-0.27	0.75	-0.26	0.49	-0.07	0.43	-0.56	-0.24	-0.04	-0.19	-0.63	-0.85	-0.25	-0.27	-1.21	-1.24	0.81	-0.01	-0.26	-0.26	-1.15	-0.56	1.29	0.51	0.28	-0.41
GENE3399X	IMAGE:151240	119607 Homo sapiens, clone MGC:20120 IMAGE:3677070, mRNA, complete cds Hs.348490 H02525	1	-0.67	-0.89	-0.99	-0.66	-1.41	-0.84	-0.12	0.87		0.58			-0.56	0.61	2.32		0.1	0.16	-0.14	-0.92	-0.94	-0.83			0.46	-0.32	-0.92	-0.11	-0.43	-0.8	-1.17	1.25	-0.94	-1.3	-1	0.5	1.1	-0.52	-0.7	-0.65	-0.74	-1.33	0.59		-1.81
GENE3311X	IMAGE:301995	119020 Homo sapiens, clone MGC:20120 IMAGE:3677070, mRNA, complete cds Hs.348490 N89738	1	-0.41	-0.71		-0.57	-1.32	-0.43	-1.63	0.42		0.59	0.22	0.13	-1.32	2.11	2.75	-2.47	0.04	0.01		-0.57	-1.17	-0.08		-0.05	0.51	-1.34	-0.67	-0.36	-0.45	-0.3	-1.16	1.56	-1.06	-1.33	-0.83	0.45	1.43	-1.35	-1.89	-0.95	-0.21	-1.68	0.6	-0.99	-0.95	-1.24
GENE2990X	IMAGE:504420	117072 ESTs Hs.71721 AA142913	1	-0.7	0.54	-0.49		-0.23	-0.74	-0.45	-0.34	-0.44	-0.17	-0.61	-0.66	-0.7	0.26	0.91	-1.06	-0.41		0.36	-0.56	0	-0.19	-0.67	-0.27	-0.09	-1.06	-0.57	-0.31	-0.74	-0.45	-1.1	-0.07	-0.4	-1.1	-0.88		0.48	-0.66	-1.25	-0.36	-0.54	-0.53	-0.06	-0.94		-0.92
GENE659X	IMAGE:1569631	103703 LCP **host cell factor homolog Hs.20597 AA934524	1	-0.02	-0.49	-0.69	0.37	0.19	0.18	-0.63	0.14	1.33	0.28	1.16	-0.05	-1.16	-0.71	-0.46	-1.28	0.07	0.41	0.24	-0.06	0.06	0.38	-0.9	-0.11	-0.66	-0.75	-1.2	0.05	-0.64	-0.45	-0.1	-0.16	-0.18	0.44	-0.16	-0.96	-1.06	0.08	-0.76	0.24	0.08	0.4	-0.39	-0.44	-0.7	0.3
GENE4247X	IMAGE:825363	223156 ESTs Hs.21887 AA504513	1	-0.14	0.24	0.11	-0.19	-0.26	0.71	-0.18	0.33	-0.28	0.44	1.34	0.27	0.87	0.06	-0.28	-1.47	0.14	0.12	0.42	-0.28			-0.24	0.13	-0.08	0.11		-0.16		-0.19	-0.6	0.13	-0.07	-1.53	-0.69	-0.28	-0.18	0.26	-1.04	0.13	-0.39	0.26	-0.39	-0.03	-0.26	-0.01
GENE6269X	IMAGE:811817	319095 FLJ21032 hypothetical protein FLJ21032 Hs.247474 AA443173	1	-0.77	-0.32		-0.22	-0.54	-0.24	0.13	1.15		1.45	2.28	-0.36	0.12	1.83	1.35	-1.3	0.26	1.59	1.14	-0.85	-0.95	-0.67	-1.01	0.02	1.43	0.93	-0.01	-0.02	-0.02	-0.83	-1.29	-0.95	-0.75	-1.81	0.12	-0.55	-0.21	-0.3	-0.56	-0.39	-0.07	-0.61	0.44	0.26	-0.34	-0.01
GENE2613X	IMAGE:838155	115014 FLJ21032 hypothetical protein FLJ21032 Hs.247474 AA457374	1	-0.4	-0.74	-0.54	-0.63	-0.83	-0.02	-1.1	1.14	-1.01	0.7	2.11	0.24	-0.56	1.43	1.13	-1.22	-0.14	1.78	0.09	-0.73	-0.59	0.25		-0.06		0.43	-0.37	-0.05	-0.32	-0.88	-1.72	-1.23	-0.55	-1.5	0.46	-0.15	-0.11	-0.12	-0.09	-0.52	-0.55	-0.78	0.16	-0.97	-0.59	0.11
GENE3447X	IMAGE:241066	119901 Homo sapiens cDNA: FLJ21028 fis, clone CAE07155 Hs.6083 H91308	1	-0.42	-0.53	-0.15	-0.44	-0.18	-0.56	-0.15	-0.24	0.34	0.13	2.89	2.26	-0.59	0.59	0.89	-0.72	-0.28	0.1	-0.19	-0.35	-0.27	0.76	0.47	-0.14	-0.49	0.23		-0.06	-0.19	-0.26	-0.39	-0.01	-0.35	-0.82	-0.37	-0.55	-0.32	-0.62	-0.63	-0.14	-0.74	-0.19	-0.65	0.29	0.46	-0.36
GENE469X	IMAGE:138304	102657 ITPR2 inositol 1,4,5-triphosphate receptor, type 2 Hs.238272 R68020	1	-0.56	-0.22	0.35	-0.01	-0.7	-1.04	-0.18	2.21	0.44	-0.32	1.61	2.65	-1.21	1.02	0.09	-1.17	0.04	-0.28	-0.38	-0.49	-0.75	0.18	-0.8	-0.31	-0.41	0.43	-1.18	0.02	-0.01	-0.61	-0.33	0.02	-0.53	-1	-0.02	-0.69	-0.74	-0.53	0.23	-0.29	0.44	-0.05	-0.36	0.39	0.73	-0.05
GENE76X	IMAGE:362926	100398 PRKACB protein kinase, cAMP-dependent, catalytic, beta Hs.87773 AA018979	1	-0.7	1.93	0.3	0.01	-0.63	-0.58		-0.19	0.17	-0.72	1.08	0.67		0.77	0.96		0.02	-0.52	-0.69	-0.74	-0.02	-0.01	-0.6	0.71	0.48		-0.47	0.43	-0.87	-1.01	-0.43	1.27	-0.87	-1.12	-0.84	0.91	0.35	-0.39	0.97	1.15	-0.47	-0.47		0.83	-0.85	-0.85
GENE6649X	IMAGE:796442	99803 PRKACB protein kinase, cAMP-dependent, catalytic, beta Hs.87773 AA459980	1	-0.86	1.41	-0.12	0.37	-0.21	-0.88	-0.75	-0.3	-0.02		0.72	0.17		0.87	0.56	-1.41	0.07		-0.9	-1.63	-0.91	-0.54	-0.93	0.71	0.18	-1.49	-1.8	-1.22	-0.92	-1.12	-1.1	0.15	-1.22	-1.33	-1.54	0.66	0.42	-0.14	0.58	0.89	-0.54	-0.59	1.04	0.12	-1.8	-1.06
GENE3405X	IMAGE:66552	119656 L3MBTL l(3)mbt-like (Drosophila) Hs.119021 T67045	1	-0.38	0.33	0	-0.76	0.77	0.32	-0.92	-0.31	-0.58	-0.99	1.34	-0.09	-0.34	-0.04	0.04	-1.08	-0.62	-0.05	0.41	0.12	-0.12	0.05		-0.25	-0.68		-0.8	-0.61	-0.56	-0.82	-1.14	-0.58	-0.63	-0.99	-1.35	-0.03	0.11	-0.41	-0.69	0.02	-0.51	-0.4	-0.34	-0.37	0.62	-0.09
GENE136X	IMAGE:241985	100753 IPW imprinted in Prader-Willi syndrome Hs.5022 H93310	1	-0.27	0.31	-0.06	-0.86	-0.88	0.22	-0.2	-1.28	0.99	-1.55		1.2	-0.27	-0.76	-0.16	-2.32	-0.05	-1.96	0.89	1.35	-0.19	2.11		-0.38	0	-1.37	-0.53		0.3	-0.11	-1.08	-0.93	-0.63	-1.3	-0.27	0.64	-0.35	0.36	0.62	0.11	0.11	-0.42	-0.2	0.18	-0.05	-0.95
GENE168X	IMAGE:626326	100986 SNURF SNRPN upstream reading frame Hs.58606 AA188619	1			-0.34		-0.09	-0.44	-0.59		1.63			1.61	-0.98	-0.14	-0.59		-0.29		-0.47	0.25	-1.38	1.22	-0.31	-0.67	-0.59	-1.45	-1.25	-0.9	-0.42	-0.5	-1.56	-1.28	-0.08	-1.68	-1.42	1.26	-0.42	-0.08	-0.88	0.06	-0.11	-0.67		0.22		-1.04
GENE1595X	IMAGE:271483	109206 Homo sapiens cDNA FLJ31797 fis, clone NT2RI2008942, weakly similar to NEURAL CELL ADHESION MOLECULE L1 PRECURSOR Hs.118321 N31808	1	-0.51	0.03	0.52	-0.06	-0.1	1.85	-1.45	-0.44	0	-1.18	0.53	-0.5	-0.1	-0.38	-0.76	-1.94	-0.03	-0.64	0.17	0.5	-0.18	0.42	0.09	-0.84	-0.31	-0.89	-0.69	-0.47	-0.86	-0.89	-0.63	-0.12	-0.99	-1.38	-0.87		0.22	-0.56	-1.24	0.06	-0.95	-0.32	-0.95	-0.06	2.03	-0.24
GENE29X	IMAGE:46694	100151 FLJ12666 hypothetical protein FLJ12666 Hs.23767 H10192	1	-0.35	0.1	0.59		0.3	1.88	-0.21	0.27	-0.16	-1.12	0.8	0.27	-0.07	0.21	-0.62		0.21	-0.58	0.14	0.65	-0.71	-0.7	-0.47	-0.59	-0.28	-0.94	-1.23	-0.46	-0.25	-0.51	-0.47	-0.47	-0.82	-0.66	-1.22	-0.37	0.43	-0.37	-0.77	0.58	-1.43	-0.99	-0.34	0.5	2.27	0.37
GENE1128X	IMAGE:295889	106544 SHMT2 **serine hydroxymethyltransferase 2 (mitochondrial) Hs.75069 N67017	1			-0.25		-0.38	2.2	-0.8					0.28	-0.16	-0.51			0.15		-0.29	1.46	-0.32	0.02	-0.44	0.1	0.32	-1.47	-0.43	-0.17	-0.25	-0.42	0.1	-0.03	-0.41	-2.4	-1.45		0.12	-0.42	-0.9	0.63	-0.88	-0.75		-0.15	2.43	-0.01
GENE2326X	IMAGE:592594	113367 LIG1 ortholog of mouse integral membrane glycoprotein LIG-1 Hs.4193 AA159578	1	-0.7	0.26	-0.3	0.08	1.2	0.5	-0.19	-0.14	0.87	-0.07	2.09	0.8		0.73	1.02	0.3	0.16	0.75	-0.07	0.04	-1.11	-0.27	-0.29	-0.82	-0.1	-1.82	-0.36	-0.24	-2.4	-2.08	0.5	-0.17	-0.3	-2.14	-0.9	-1.08	-0.42	-1.92	-0.58	-0.01	-0.59	-0.51	-0.02	-0.15	0.07	0.87
GENE4873X	IMAGE:395573	226662 FLJ12895 hypothetical protein FLJ12895 Hs.235390 AA757678	1	-0.25	-0.31	-0.83	0.09	0.08	-1.08	0.4		2.47	-0.42	0.72	0.18	0.09	0.81	1.4		-0.71	2.86	0.13	0.9	-0.97	-0.35	-2.12	-0.84	-0.69	-1.85	-1.84	0.16	-1.57	-1.3	-1.34	-1.9	-0.83	-1.13	-0.69	-0.56	-0.63	-1.37	-1.04	-0.14	-0.97	-0.42	-0.95	-0.3	-0.01	-1.27
GENE6141X	IMAGE:1859573	317517 C20orf81 chromosome 20 open reading frame 81 Hs.29341 AI199155	1	-0.77	-0.42	-0.85	0.19	-0.7	-0.49	-0.18		0.8	0.84	1.44	-0.3	-0.14	1	0.27	-0.88	0.01	0.14	0.56	0.41	0.43	-0.46	-0.98	-0.71	-0.7	-0.28	-0.42	-0.62	-1.12	-1.1	-1.2	-1.13	-0.29	-0.32	-1.4	0.76	0.01	-0.32	-0.5	-0.05	0.57	-0.36	-0.09	0.4	0.84	-0.01
GENE1274X	IMAGE:126522	107449 GGTL3 **gamma-glutamyltransferase-like 3 Hs.343357 R06839	1	-0.4	-0.97	-1.17	0.02	-0.66	-1.01	1.23	0.91	0.76	1.22	2.65	1.3	-0.03	-0.23	1.05	-1.33	-0.02	-0.32	0.75	0.97	-0.29	0.14	-0.58	-0.8	0.22	-1.28	-0.16	-0.54	-1.39	-1.23	-0.95	-0.86	-0.27	-0.97	-1.08	-0.04	0.03	-1.02	-0.79	0.08	0.97	0.6	0.81	0.75	0.55	-0.81
GENE3747X	IMAGE:32776	220240 **Homo sapiens mRNA; cDNA DKFZp434P0235 (from clone DKFZp434P0235) Hs.34348 R20402	1	-0.23		-0.61	-0.63	-0.71	-0.63	0.19	0.94	0.2	0.42	0.83	0.02	-0.09	0.87	0.75	-1.14	-0.39	0.85	0.55	-0.47	0.16	0.62	-0.95	-1.18	-0.65		-0.04	-0.35	-0.35	0.2	-1.12	-0.61	0.18	-1.84	-0.61	0.54	0.44	-1.36	-0.22	0.21	-0.05	-1.08	0.19	-0.01	0.54	-0.1
GENE1323X	IMAGE:267186	107708 Homo sapiens cDNA FLJ31930 fis, clone NT2RP7006162, weakly similar to ZINC FINGER PROTEIN MFG-3 Hs.351270 N23340	1	-0.72	-1.13	-1.13	-0.92	-0.32	-1.43	-0.27	0.63	0.64	0.83	1.18	-0.3	0.52	1.03	0.87		-0.53	1.04	-0.12	-0.62	0.14	0.39	-0.84	-0.68	-0.61	-1.05	-0.04	0.18	-0.07	0.44	-1.42	-2.04	0.53	-2.12	-1.19	0.58	0.68	-1.09	-0.95	0.61	0.14	-0.97	0.69	-0.05	0.55	-0.21
GENE5464X	IMAGE:284007	309708 Homo sapiens mRNA; cDNA DKFZp434P0235 (from clone DKFZp434P0235) Hs.34348 N53382	1	-0.17		-0.48	-0.54	-0.43	-0.95	-0.04	0.75	-0.11	0.08	0.16	0.47	0.22	0.58	0.54		0.19		0.18	-0.45	-0.42	-0.43	-0.44	0.22	-0.11	-0.97	-0.01	0.17	-0.07	-0.4	-1.37	-0.85	0.41	-1.53	-0.72	0.13	0.22	-0.08	-0.47	0.12	-0.03	-0.78	0.58	0.28	0.4	-0.52
GENE5971X	IMAGE:2284924	314918 KIAA0882 KIAA0882 protein Hs.90419 AI628353	1	-0.59	0.27	0.91	-0.93	-0.29	0.32	-0.88	-0.35	-0.22	-0.22	0.17	0.45	-0.33	-0.78	0.92		-0.56	-0.75	-0.09	0.06	1.35	-0.16	-0.94	-0.73	-0.76	-1.31	-1.04	-0.32	-0.67	-0.85	-0.42	-1.29	-0.15	-1.67	-1.08	0.26	-0.24	-1.34	-0.25	1.05	-0.81	0.67	0.15	0.2	-0.06	-0.26
GENE4867X	IMAGE:451546	226626 FLJ10210 hypothetical protein FLJ10210 Hs.183639 AA707400	1	-0.34	-0.08	0.03	-1.02	-0.37	0.04	0.44	-0.04	0.21	0.27	0.98	0.87	-0.16		0.35	-0.84	-0.1	-0.01	-0.37	0.04	-0.17	0.57	-0.57	-0.49	0.2	-1.12	-0.4	0.55	-0.23		-0.35	-0.56	-0.73	-1.35	-0.42	0.01	0.11	-0.53	-0.21		-0.41	0.06	-0.53	0.11	0.82	-0.16
GENE2845X	IMAGE:52086	116357 H23425	1	-0.47	-0.17	-0.31	-1.2	-0.73	-0.29	-1.26	-0.22	1.31	-0.64	2.02	1.04	-0.36	0.02	0.27	-1.43	-0.14	-1.09	-0.43	0.41	-0.5	1.28	-0.71	-0.14	-0.39	-1.55	-1.35	0.76	-1.12	-1.14	-1.04	-1.38	-0.66	-1.73	-0.78	-0.47	-0.12	-0.12	-0.88	-0.09	0.7	0.65	-0.09	0.21	0.67	-0.6
GENE5194X	IMAGE:50763	307918 CBX6 chromobox homolog 6 Hs.107374 H17334	1	-0.34		0.01	-0.97	-1.07	-0.36	-0.27	-0.32	1.33	-0.26	2.07	1.26	-0.12	0.41	0.4	-1.28	-0.19		-0.33	0.25	-0.7	0.54	-0.07		-0.46	-1.61	-1.06	0.62	-1.1	-1.29	-0.81	-1.2	-1.04	-1.14	-0.73	-0.63	-0.31	0.46	-0.51	-0.16	0.52	0.88	-0.59	0.08	0.7	-0.73
GENE480X	IMAGE:32522	102721 ESTs, Moderately similar to ALUC_HUMAN !!!! ALU CLASS C WARNING ENTRY !!! [H.sapiens] Hs.13702 R18757	1		0.03	0.11	-1.13	-0.24	-0.85	-0.67		0.24		0.38	0.47	0.42	0.04	-0.51		0.41	-1.69		0.46	0.15	0.21	0.25	-0.05	-0.03	-0.04	-0.52	-0.07	-0.21	-0.21	-0.87	-0.66	-0.75	-0.79	-0.07	0.05	0	-0.12	-0.84	-0.33	0.01	-0.05	-0.1	0.36		-1.52
GENE6443X	IMAGE:796904	98586 PLAGL1 pleiomorphic adenoma gene-like 1 Hs.75825 AA463204	1	-0.01	0	-0.8	-0.82	-0.23	-0.48	-0.68	1.96	0.31	0.4		1.5	-0.99	-0.35	-0.83	-1.45	-0.44	-0.88	-0.33	-0.68	-0.27	0.7		-0.79		-0.86	-0.14	-0.01	-0.48	-0.45	-0.91	-0.45	-1.14	-1.5	-0.28	-0.29	0.86	-0.52	0.02	0.92	-0.38	-0.42	-0.5	-0.15	1.05	-1.27
GENE6117X	IMAGE:2244564	317017 OLFM1 olfactomedin 1 Hs.74376 AI656802	1	0.21		-0.05	-0.36	-0.02	0.24	0.37	-0.86				1.5	-0.59	-0.15			-0.03		-0.14		-0.4	-0.32	-0.42	-0.02	-0.38	-1.25	-1	-0.49	-0.42	-0.11	-1.01	-0.43	-1.08	-1.22	-0.42		-0.62	-0.32	-0.34			-0.04		-0.28	2.31	-0.82
GENE1253X	IMAGE:29030	107342 CIC capicua homolog (Drosophila) Hs.306117 R40377	1	-0.44		-0.95	0.16	-1.07	1.03	0.85	0.05	0.57	0.1	1.27	0.65	-1.75	0.83	0.2	-0.1	-0.39	0.16	0.23	-0.43	1.08	0.61	-0.86	-0.43	-0.86	-2.11	-2.18	-1.16	-1.67	-1.74	0.19	-1.39		-2.22	-1.54	-0.71	-0.34	-1.1	-0.9	0.4	-0.21	-0.09	0.21	0.47	0.68	0.41
GENE1934X	IMAGE:128493	111159 MLH1 mutL homolog 1, colon cancer, nonpolyposis type 2 (E. coli) Hs.57301 R10662	1	-0.21	-1.13	-1.35	0.45	-1.14	0.59	0.26	-0.4	0.7	0.72	1.06	0.61	-1.34	0.55	0.41	1	-1.04	0.4	0.46	0.23	0.2	-0.09	-1.38	-1.32	-1.36	-1.89	-1.89	-1.16	-1.29	-2.05	0.57	-1.34	0.18	-2.18	-1.24	0.11	-0.12	-1.31	-1.53	-0.01	0.19	0.02	0.01	0.14	0.74	0.07
GENE4479X	IMAGE:1417886	224466 FLJ23239 hypothetical protein FLJ23239 Hs.34516 AA894457	1	-0.12	-0.9		-0.63	0.01	-0.21	-0.15	1.29	0.15	0.84	1.98	0.35	-0.55	-0.08	-0.95	0.56	0.77	-0.25	0.13	0.7	-0.23	-0.63	-0.3	0.11	-0.16	-0.97	-0.88	-0.09	-0.21	-0.15	-0.43	-0.93	-0.74	-2.13	-1.15	-0.22	-0.06	-0.95	-0.23	0.25	0	-0.23	-0.6	-0.13	-0.23	0.39
GENE16X	IMAGE:428782	100095 PRO2730 hypothetical protein PRO2730 Hs.194110 AA005230	1	-0.63	-0.4	1.29	1.31	-0.25	-0.43	-1.06	2.79	1.06	0.46		0.42	-1.07	0.07	1.45	-1.34	0.94			-1.1	-0.14	-1.09	-2.4	-2.01	-0.94	-1.74	-3.15	-1.7	-0.45	-0.7	-1.95	-2.95	-0.71	-1.75	-1.69	-2.18	-0.95	-1.69	-1.34	-0.63	0.38	1.32	0.7	0.19	-0.48	-0.3
GENE2576X	IMAGE:428431	114859 PKIB protein kinase (cAMP-dependent, catalytic) inhibitor beta Hs.106106 AA004415	1	-0.57	-0.47	0.46	-0.1	0.18	-0.3	-0.39	1.47	1.15	-0.16	0.08	0.25	-0.69	-0.52	0.25	-1.21	0.49	-1.15	0.73	-0.66	-0.52	-0.79	-1.03	-1.04	-0.7	-0.73	-1.56	-1.15	-0.08	-0.18	-1	-2.04	-0.04	-1.4	-1.36	-0.89	-0.45	-1.04	-1.02	0.13	0.92	0.43	-0.05	-0.35	-0.47	-0.01
GENE2202X	IMAGE:726035	112735 JUN v-jun sarcoma virus 17 oncogene homolog (avian) Hs.78465 AA293362	1	0.43	0.12	-0.87	0.42	-0.69	0.28	-0.78	0.07	0.86	1.98		-0.08	-0.12	0.72	-0.23	0.65	0.3	1.01		-1.15	-1.36	0.35	-0.91	-0.55	0.49	0.28	-1.35	-0.48	-0.67	-0.12	-1.62	-2	-0.55	-2.78	-1.48	0.02	-0.19	-1.13	-0.56	0.59	-0.57	-0.41	-0.02	-0.06	-0.53	-1.85
GENE2036X	IMAGE:358531	111813 JUN v-jun sarcoma virus 17 oncogene homolog (avian) Hs.78465 W96134	1	0.09	0.1	-1.03	0.1	-0.55	0.45	-0.08	0.03	0.94	1.54	0.1	-0.38	-0.23	0.47	-0.3	0.57	0.04	1.03	0.19	-1.12	-1.08	0.19	-0.96	-0.77	0.5	0.01	-1.6	-1.2	-0.5	-0.3	-1.43	-1.7	-0.41	-2.25	-1.66	0.01	-0.44	-0.99	-0.75	0.57	-0.04	-0.36	0.08	0.12	-0.53	-1.64
GENE3560X	IMAGE:897884	120564 KIAA1573 KIAA1573 protein Hs.24790 AA598639	1	-0.59		-1.19		-0.6	-0.15	-0.02		1.26	1.96		3.02	-0.48	0.94	1.27		-0.13			0.15	-1.37	-0.56	-1.15	-0.73	-0.21	1.14	-0.35	-0.56	-0.41	-0.28	-1.79	-1.42	-0.37	-2.03	-1.34	-0.65	-0.54	-0.52	-0.42	1.15	-0.74	-1.17	-0.39	-0.52	-0.92	1
GENE5347X	IMAGE:1555406	308968 PEAS testis intracellular mediator protein Hs.281706 AA975186	1	-0.42	-0.68	-0.56	0.68	-0.43	0.03	-0.06	1.28	0.78	2.71	2.04	0.4		0.34	0.22	0.77	-0.29	1.31	1.28	0.14	-0.76	-0.35	-0.77		-0.5	-1.02	-0.22	-0.28	-0.75	0.22	-0.6	-1.36	-0.65	-0.11	-0.88		0.9	-0.3	-0.95	-0.79	-0.03	-0.75	-0.85	-0.6	0.41	1.04
GENE407X	IMAGE:586650	102366 SLC29A1 solute carrier family 29 (nucleoside transporters), member 1 Hs.25450 AA129134	1	-0.32	-0.79	-0.63	0.32	-0.17	0.24	-0.28	0.85	0.18	2.89	2.11	0.39		-0.03	-0.64	0.3	0.03	0.97	0.39	0.59	-1.32	0.55	-0.87	-0.46	-0.02	-0.09	0.24	-0.24	-0.8	-0.87	-0.65	-0.89	-0.64	-0.83	-0.64	0.05	0.92	-0.3	-0.52	-0.28	0.72	-0.63	0.16	-0.25	0.15	0.6
GENE2242X	IMAGE:810457	112928 MGC2555 hypothetical protein MGC2555 Hs.158210 AA457137	1	-0.08	-0.96	-0.76	-0.99	-0.79	-0.05	0.02	3.6	1.43	0.34	1.47	1.01	1.2	1.19	0.99	-0.5	-0.39	-0.61	-0.28	0.01	-0.31	0.26	-0.17	-0.51	0.07	-0.88	-0.9	0.29	-0.78	-0.74	-1.32	-0.99	0.02	-1.15	-0.8	-0.45	-0.31	-0.27	0.03	-0.18	0.64	0.29	-0.33		-1.23	-1.44
GENE1187X	IMAGE:2028824	106949 DKFZP761I2123 **KIAA1886 protein Hs.77978 AI263023	1	-0.31	-0.33	-0.47	-0.62	-0.28	-0.32	-0.54	1.9	-0.24	0.81		0.23	-0.68	-0.19	-0.32	-0.01	0	0.85		-0.15	-0.01	-0.82	0.17	-0.12	-0.04	0.1	-0.57	-0.23	-0.64	-0.98	-0.5	0.01	-0.81	0.68	-0.26	0.66	-0.27	0.27	-0.62	-0.29	-0.21	-0.14	0.12	-0.22	-0.02	0.1
GENE477X	IMAGE:784283	102711 DKFZP564B147 DKFZP564B147 protein Hs.284266 AA447501	1	-0.62	-0.11	-0.52	-0.53	-1.29	0.31	-0.55	2.07	0.95	1.37	0.32	0.82	0	-1	-2.17	-1.82	-0.96		0.71	0.41	1.04	-0.41	-1.19	-0.36	-1.03	-0.58	-0.49	0.18	-1.71	-1.5	-0.35	-1.68	-0.48	-0.1	-1.19	0.56	0.29	-0.35	0.28	0.48	0.15	-0.01	-0.07	0.48	0.7	0.55
GENE49X	IMAGE:345621	100243 CXX1 CAAX box 1 Hs.250708 W72596	1	-0.35	-0.2	-0.43	-0.77	-0.91	0.35	0.21	1.24	0.67	0.86	0.23	0.89	0.1	-0.33	-1.64	-1.55	-0.49	0.35	0.6	0.35	0.76	-1.16	-0.53	0.23		-0.5	-0.22	-0.52	-1.14	-1.31	-0.57	-1.44	-0.68	-0.28	-0.87	0.46	0.09	-0.42		0.51	-0.12	-0.2	-0.25	0.09	0.72	0.36
GENE3835X	IMAGE:868128	220802 JM4 JM4 protein Hs.29595 AA634218	1	-0.14	-0.37	-0.96	-1.01	-0.57	1.62	0.06	2.01	-0.31	0.41	1.43	0.97	-0.72	-0.07	-0.87	-0.85	-0.15	-0.41	-0.3	0.37	0.4	-0.15	-0.39	-0.26	-0.8	-1.2	-0.82	-0.15	-1.05	-0.38	-0.17	-0.07	-1.13	-0.74	-0.33	-0.5	0.06	-0.76	-0.33	-0.18	-0.74	-0.74	-0.61	-0.24	0.41	1.25
GENE6334X	IMAGE:2316397	319994 MAGED2 melanoma antigen, family D, 2 Hs.4943 AI684984	1	0.18	-0.13	-1.05	-0.48	-0.13	0.49	-0.1	1.31	0.23	0.7	1.27	0.76	0.35	-0.21	-0.49	-0.6	0.1	0.08	0.16	-0.06	0.51	-0.41	-0.54	-0.53	-0.4	-0.97	-0.18	-0.33	-0.48	-0.85	-1.32	-1.52	-0.71	-0.86	-0.73		-0.41	-0.69	-0.92	-0.25	-0.11	-0.63	-0.06	-0.17	-0.33	1.05
GENE2540X	IMAGE:301735	114637 TGM3 transglutaminase 3 (E polypeptide, protein-glutamine-gamma-glutamyltransferase) Hs.2022 N90882	1	-0.78	-0.55	-0.87	0.01	-0.11	0.99	-0.86	0.89		0.96	-1.02	0.53	-0.1	-0.41	-0.58	-1.26	-1.08	0.6	-0.48	-0.51	0.83	-0.23	-0.84	-0.78	-0.52	-0.83		-0.29	-1.1	-1	-1.05	-0.76	-0.53	-0.16	0.12	0.41	-0.35	-0.28	-0.9	0	0.32	-0.58	-0.45	-0.45	-0.34	0.27
GENE3189X	IMAGE:795603	118287 SLC22A3 solute carrier family 22 (extraneuronal monoamine transporter), member 3 Hs.81086 AA460012	1	-0.38	-0.79	-1.95	0.32	-0.48	1.27	-0.95	1.27	-0.39	0.82	-1.16	0.88	-0.13	-0.19	-1.37	-1.81	-1.21	0.92	-0.48	-0.86	1.18	-0.12	-0.95	-0.37	-0.6	-1.28	-0.29	-0.03	-1.73	-1.75	-2.22	-1.35	-0.44	-0.13	0.31	0.85	-0.2	-0.52	-0.7	0.16	0.76	-0.91	-0.13	-0.55	-0.29	0.83
GENE946X	IMAGE:251826	105515 LOC51186 pp21 homolog Hs.15984 H96654	1	-0.37	-0.84	-2.61	0.3	-0.44	1.61	-0.57	1.58	-0.09	1.18	-0.9	1.14	-0.41		-1.3	-1.76	-1.09	0.83	-0.27	-1.03	1.1	-0.6	-1.2	-0.85	-0.42	-1.4	-0.74	-0.29	-2.45	-1.7	-2.36	-1.61	-0.44	0.07	-0.05	0.82	0	-0.83	-0.6		0.31	-1.54	-0.05	-0.43	-0.63	0.51
GENE3085X	IMAGE:138775	117645 NGFRAP1 nerve growth factor receptor (TNFRSF16) associated protein 1 Hs.17775 R63543	1	-0.36	-0.36	-1.6	-0.82	-0.53	0.8			-0.88	0.65	-0.35	1.4	1.42	-1.01	-2.1	-1.06	-0.81		-0.51	-0.24	0.53	0.19	-0.48	-1	-0.87	-0.85	-2.13	0.38	-1.49	-0.85	-2.44	-1.36	-1.53	0.57	-0.74	1.2	-0.72	-1.17	-0.5	0.36	0.04	-0.92	-1.22	-1.03	-1.77	-1.5
GENE2805X	IMAGE:308682	116151 ABCF2 ATP-binding cassette, sub-family F (GCN20), member 2 Hs.153612 N95462	1	-0.44	-0.5	-0.64	-0.84	-0.99	0.76	-0.72	3.17	-0.18	0.64	-0.45	1.58	1.07	0.07	-1.07	-0.64	-0.27	0.82	-0.45	-0.31	0.58	-0.48	0.35	-0.45	-0.23	-0.96	-1.38	0.32	-1.06	-0.73	-1.51	-1.09	-1.21	0.43	-1.03	0.82	-0.7	-0.43	-0.53	-0.32	0.17	-0.74	-0.75	-0.84	-1.47	-0.92
GENE2893X	IMAGE:296616	116605 FLJ21174 hypothetical protein FLJ21174 Hs.194329 N73975	1	-0.64	-0.76	-1.63	-0.51	-0.06	-0.06		1.41	-0.31	0.74	0.63	1.32	0.36	-0.03	-0.22	-0.44	-0.57	0.2	0.38	-1.13	0.39	0.42	-1.49	-0.55		-1.54	-0.39	-0.23	-1.06	-0.63	-2.17	-1.47	-1.12	-0.02	0.39	0.76	0.09	0.28	-0.5	-0.33	-1.63	-0.59		0.4	0.12	1.05
GENE4399X	IMAGE:447416	224055 PHRET1 PH domain containing protein in retina 1 Hs.8124 AA702335	1	0.28		-2.64	1.12	-1.2	1.97	0.5	3.44	0.45	-0.66	2.12	3.76	1.11	1.51	1.21	0.47	1.76	0.96	1.49	0.71	0.94	0.3	-2.85	-1.47	-2.32	-2.26	-0.56	-2.64	-1.24	-0.48	-1.89	-3.01	0.3	-2.87	-1.62	0.01	-0.95	-1.38	-2.86		0.63	-2.26	1.54	1.13	-2.93	0.31
GENE3469X	IMAGE:731469	119998 PHRET1 PH domain containing protein in retina 1 Hs.8124 AA412417	1	-0.02		-0.91	1.5	-1.09	1.36	-0.15	3.43	0	-1.35	1.95	2.61	0.78	1.45	1.08	0.55	0.96	0.62	1.61	0.61	0.71	-0.26	-1.45	-1.2	-0.95	-1.2	-0.34	-1.52	-0.64	-0.64	-1.45	-1.64	0.25	-2.36	-0.85	-0.36	-0.74	-0.85	-2.77	-1.36	0.74	-1.06	1.45	0.85	-2.51	0.37
GENE1409X	IMAGE:744436	108168 ESTs Hs.112954 AA621224	1	0.02			0.76	-0.51	1.12	0	2.94	0.11		2.01	2.74	0.51	0.82			1.11		1.34	0.38	0.07	0.2	-0.86	-0.94	-0.66	-1.24	-0.5	-1.19	-0.92	-0.03	-0.74	-1.11	0.18	-0.96	-0.83	-0.1	-0.24	-0.61	-1.58		-0.36	-1.01	1.43	0.64	-1.1	0.27
GENE2763X	IMAGE:814576	115941 ZFP36L2 zinc finger protein 36, C3H type-like 2 Hs.78909 AA480880	1	-0.09	-0.45	-0.32	0.66	-0.55	0.04	0.61	2.23	0.21	0.92	1.23	0.59	-0.37	0.76	0.38	-0.16	0.13	0.45	1.56	-0.55	-0.46	-1.36	-1.52	-1.06		-0.19	-1.06	-0.3	-0.44	0.36	-0.14	-0.86	0.18	-1.48	-0.25	-0.19	-0.02	-1.25		0.14	0.22	-0.34	-0.19	-0.43	-1.15	-0.5
GENE675X	IMAGE:741139	103829 EYA2 eyes absent homolog 2 (Drosophila) Hs.29279 AA402207	1	-0.48	-0.08	-0.43	0.1	-0.67	0.03	0.3	2.8	-0.44		1.22	0.15		0.4	0.61		-0.08	1.17	0.23	-0.5	-0.69	-0.51		0.27	-0.18	-0.12	-0.57	-0.18	-0.31	-1.35	-0.49	-0.63	-0.34	-0.61	-0.78	-0.12		0.42	-0.28	-0.39	-0.96	-0.45	-0.65	-0.72		-1.07
GENE2937X	IMAGE:786675	116812 WFDC2 WAP four-disulfide core domain 2 Hs.2719 AA451904	1	-1.09	-1.53	-2.63	0.25	-1.75	0.47	-0.24	4.66	-1.61	-1.17	2.48	3.14	-0.63	-1.36		-5.25	0.09	2.46	2.99	0.55	0.28	-0.98	-1.41	-0.46		0.48	-1.43	-1.64	-3.14	-2.01	-0.18	-1.32	0.04	-2.88	1.09	0.8	1.44	-1.34	-0.66	-2.03	-0.13	-1.16	0.79	-1.08	-1.64	-2.11
GENE4446X	IMAGE:395794	224263 EST Hs.121254 AA757852	1	0.01	-1.25	-0.89	-0.1	-0.99	-0.39	-0.88			0.74	0.9	3.24	0.99	-1.09	-1.25	-0.63	-1.06		2.15	1.55	-0.28	-0.09	-0.58	-0.26	-1.16	-1.02	-0.09	-0.03	-0.25	-0.45	-0.64	-0.68	0.51	0	-0.46	-0.82	-1.43	-0.6	-0.06	-0.39	-0.33	-0.47	0.17	-0.77	-0.64	-0.79
GENE2952X	IMAGE:754148	116885 HYPC Huntingtin interacting protein C Hs.33104 AA478630	1	-0.42	-0.25	-0.4	-0.11	-0.54	-0.34	0.36	1.71	1.34	1.78	2.18	-0.16	0.57	-0.22	-0.12	-0.32	-0.64	0.18	0.61	0.49	0.36	-0.54	-0.51	-0.56	-0.48	-0.65		-0.27	-1.61	-1.17	-0.18	-0.21	0.47	0.04	-0.19	0.75	-0.07	-0.74	0.06	0.45	-0.8	-0.37		0.27	-0.2	-0.34
GENE3962X	IMAGE:366524	221611 SNTA1 syntrophin, alpha 1 (dystrophin-associated protein A1, 59kD, acidic component) Hs.31121 AA026753	1	-0.46		-1.13	-0.72	-0.46	-0.06	1.14	-0.3	0.77	0.65	2.43	0.89	0.31	-1.34	-1.5	-1.54	-0.78	0	1.53	0.51	-0.25	-0.47	-0.26	-0.12		-0.84	-0.13	-0.02	-1.27		-1.06	-0.47	-0.74	-0.54	0.04	-0.31	-0.24	0.12		-0.14	-0.56	-0.08	-0.54	-0.66	0.27	0
GENE2283X	IMAGE:51406	113154 SLC13A3 solute carrier family 13 (sodium-dependent dicarboxylate transporter), member 3 Hs.102867 H18950	1	-0.06	-0.15		0.07	-0.34	0.95	-1.06	0.76	0.11	0.21	1.77	1.12	-0.14	-0.17	-0.25		-0.29	-0.84		0.2	0.42	-0.32		-0.02		-0.63	-0.54		-0.43	-0.78	-0.65	-0.64	-0.25	-0.05	-0.51			-0.53	0.05	-0.68	-0.57	-0.82	-0.32	0.05	-0.3	1.76
GENE1215X	IMAGE:50898	107141 PTE1 **peroxisomal acyl-CoA thioesterase Hs.283476 H18458	1	-0.15	-0.23	0.05	1.03	-0.61	0.39		0.71	0.66	0.07	0.72	0.54	-0.2	0	0.12	-0.07	0.01	-0.68	1.93	1.64	0.05	0.1	-0.97	-0.25	-0.4	-0.32		-0.72	-0.5	-0.33		-0.3	-0.75	-0.74	-0.9	0.34	-0.35	-0.88	0.34	-0.54	0.55	0.51	0.18	0.28	0.19
GENE1016X	IMAGE:593840	105868 DKFZP564K1964 DKFZP564K1964 protein Hs.3447 AA166810	1	0.41	0.16	0.01	1.44	-0.26	0.27	-1.57	1.1	-0.01	0.62	1.27	-1.65	-0.72	0.25	-1.24	0.76	-0.6	1.07	-0.45	-0.31	-0.52	-0.28	-1	-0.24	0.34	-2.02	-0.44	-0.21	-0.5	-0.71	-1.3	-2.13	-0.34	-2.74	-0.03	-1.29	-1.56	-1.23	-0.81	-0.25	1	0.82	-0.41	-0.82	-0.35	-0.38
GENE227X	IMAGE:172783	101338 ZNF358 zinc finger protein 358 Hs.133475 H19708	1	-0.16	-0.55	-1.21	-0.07	-0.37	0.22	-0.59	1.42	0.05	0.31	0.79	-0.27	-0.19	0.15	0.49	0.28	-0.17	-0.16	-0.22	-0.98	-0.04		-0.53	-0.4	-0.46	-1.72	-0.31	0.05	-0.9	-0.48	-1.24	-1.33	-1.25	0.4	-0.61	-0.15	-0.04	0.09	-0.67		-0.81	-0.31	-0.67	-0.45	-0.02	-0.29
GENE3170X	IMAGE:377491	118145 AA055398	1	0.07	-0.22	-0.28	0.37	-0.15	-0.18	0.01	1.75	1.32	0.08	1.49	0.89	-0.03	0.18	-0.44		-0.2	-0.47	0.59	0.43	0.38	0.16	0.41	-0.08	0.11	-0.81	-0.78	0.1	-0.46	-0.39	-0.96	-0.47	-0.48	-1.04	-0.16	-0.59	-0.23	-0.33	0.11	0.19	-0.24	0.03	-0.7	-0.74	-0.34	0.76
GENE1811X	IMAGE:138121	110413 RABEX5 putative Rab5 GDP/GTP exchange factor homologue Hs.187660 R53800	1	-0.14	-0.65	-0.55	0.23	0.13	-0.03	0.48	1.52	1.22		1.77	0.63	0.09	0.44	-0.06	-0.89	0.14	-0.12	0.62	0.1	0.18	-1.27	0.48	0.85	0.02	0.57	-0.32	-0.03	-0.97	-0.6	-0.38	-0.3	-0.45	-0.54	0.06	-0.48	-0.22	0.54	-1.06	-0.17	-0.02	-0.02	-0.31	-0.45	-0.31	0.51
GENE352X	IMAGE:49836	102050 ESTs Hs.214994 H29207	1	-0.3	-0.26	-0.23	0.06	-1.49	-0.01	-0.57	2.27	0.69	-0.18	2.34	0.95	0.06	0.22	0.32	-0.44	0.23	0.64	-0.84	-0.59	-0.55	-0.23		-0.52	-0.91	0.02	-0.21		-0.92	-0.51	-1.1	-0.52	-0.05	-0.09	-0.22	-0.37	0.14	0.05	0.3	0.04	-0.72	-0.53	0.22	-0.37	-0.07	-0.1
GENE5758X	IMAGE:1752389	312221 MGC2650 hypothetical protein MGC2650 Hs.61273 AI150104	1	0	-0.4	-0.07	0.76	-0.03	-0.28	-0.86	1.25	1.65	0.72	0.91	0.79	0.27	1.2	0.16	0.36	-0.03	0.99	0.87	0.71	0.52	0.54	-0.54	-0.61	-0.92	-0.7	-0.51	-0.95	-0.52	-0.84	-1.5	-0.67	0.21	0.64	-1.32	-0.4	-0.18	0.21	-1.01	-0.52	-0.85	0.01	-0.27	-0.48	-0.09	-0.3
GENE4321X	IMAGE:858338	223604 MGC3295 hypothetical protein MGC3295 Hs.101257 AA634063	1	0.04		-0.59	-0.26	0.13	-0.05	0.57		0.24	0.19		2.28	0.45	0.37	-0.19	-1.08	-0.24		1.31		1.11	-0.94	-0.78	-0.43	-1.07	-1.15	-1.36	-0.53	-1.12	0.11	-1.23	-0.26	-0.12	-1.12	-0.71	2.15	2.41	-0.8	-0.28	-0.17	-0.83	-0.29	0.52	1.55	0.42	-0.42
GENE1818X	IMAGE:298231	110468 GABBR1 gamma-aminobutyric acid (GABA) B receptor, 1 Hs.167017 N70841	1	-0.42	-0.57	-0.5	-0.54	-0.57	0.05	-0.6	1.44	-0.2	1.15	1.47	-0.1	-0.13	-0.77	-1.05	-0.59	-0.59	0.62	0.29	-0.06	-0.48	0.59	-0.28	-0.23	-0.43	-0.74	-0.04	-0.43	-0.81	-0.91	-0.56	-0.69	-0.13	0.31	-0.34	-0.09	-0.02	0.22	-0.29	0.08	0.36	-0.41	0.54	0.59	0.41	-0.69
GENE4536X	IMAGE:855559	224820 SAS sarcoma amplified sequence Hs.50984 AA664211	1	0.39	0.14	0.5	-0.01	-1.51	0.05	0.09	0.68	1.35	0.56	0.43	0.4	0.14	0.09	-0.19	-2.22	0.27	1.61	0.63	0.57	0.15	-0.68	-0.59	-0.31	-0.76	-1.81		-0.44	-1.77	-1.2	0.1	-0.9	-0.61	0.15	-0.03	1.15	-0.34	-0.76	-0.25	0.12	0.3	-0.26	0.22	-0.18	-0.3
GENE6431X	IMAGE:770854	98499 PTP4A3 **protein tyrosine phosphatase type IVA, member 3 Hs.43666 AA427737	1	-0.43	-0.31	-0.59	-0.64	-0.77	-0.47	0.77	0.17	2.98	2.23		0.96	0.6	-0.38		-0.4	-0.29	0.76	0.44	-0.43	-0.39	-0.7	-0.88	-0.94	-0.35	-1.22	0.2	-1.22	-1.38	-0.57	-0.64	-1.46	-0.34	-0.76	-0.03	-0.28	-0.2	-0.97	-0.78	-0.05	-0.68	-0.68	-0.36	-0.44	-0.46	-1.37
GENE1399X	IMAGE:375827	108099 PTP4A3 protein tyrosine phosphatase type IVA, member 3 Hs.43666 AA039851	1	-0.87	-0.53	-0.91	-0.59	-0.59	-0.67	0.69	-0.37	3.53	1.63	2.02	0.11	0.47	-0.31	-0.73	-0.16	-0.33	0.57	-0.08	-0.36	0.03	-0.43	-0.19	-0.85	-0.69	-1.13	-0.14	-1.25	-0.79	-0.39	-0.49	-1.16	-0.35	-0.93	-0.52	-0.43	-0.2	-0.82	-0.51	-0.17	-0.02	-0.59	-0.35	-0.7	-0.67	-1.2
GENE2189X	IMAGE:758293	112654 FLJ10773 likely ortholog of mouse NPC derived proline rich protein 1 Hs.14838 AA401264	1	-0.6	-0.13	-0.93	-0.25	0.07	0.45	-0.27	1.48	0.22	1.66	1.04	-0.12	1.38	0.94	0.47	-0.02	-0.56	-0.18	-0.15	-0.61	0.07	0.11	-0.87	-0.38	0.16	-0.12	-0.33	0.05	-1.2	-1.3	-1.29	0.37	0.08	-1.58	-0.75	-0.16	-0.36	-0.35	-0.61	0.4	-0.01	0.06	0.23	0.23	-0.38	0.99
GENE459X	IMAGE:203003	102623 NME4 non-metastatic cells 4, protein expressed in Hs.9235 H54417	1	0.1	-0.75	-1.17	-1.26	0.52	0.57	-0.16	1.99	0.47	0.85	1.07	-0.35	0.81	0.11	-0.38	0.78	-0.12	1.5	0.91	-0.58	0.64	0.21	-0.6	0.43		-1.3	0.55	0.81	-0.85	-0.4	-0.9	-0.57	-0.9	-1.74	-1.45	0.02	-0.17	0.74	-0.82	0.05	-0.64	-0.03	-0.54		0.62	1.43
GENE3797X	IMAGE:343923	220543 Homo sapiens cDNA FLJ32183 fis, clone PLACE6001886, highly similar to ADENYLATE CYCLASE, TYPE IV (EC 4.6.1.1) Hs.58043 W69778	1	-0.02	0.28	-0.16	-0.28	-0.32	1	-0.72	1.88	0.08	-0.07	1.15	-1.1	-0.68	-0.5	-0.64		-0.15	1.02	0.76	-0.88	-0.39	0.32	-0.2	-0.66	-0.48	-1.11	-0.33	-0.4	-0.48	-0.51	-0.76	-0.01	0.1	0.1	-0.22	-1.56	0.2	-0.67	-0.64	-0.7	-0.31	-0.25	-0.34	0	-0.43	-0.49
GENE3150X	IMAGE:951007	118055 EST Hs.112862 AA620423	1	-0.1	0.52	0.27	-0.56	-1.21	-0.74	-0.28	0.17	0.26	0.62		-1.15	0.07	-0.9	-0.89		0.22	-0.83	0.33	-1.13	-1.15	-0.52		-1.86	-0.45	-1.27	-0.77	-0.61	-0.61	-0.69	-0.95	-1.22	0.29	-0.76	-0.39	0	-0.08	-1.54	-0.15	-0.58	-0.54	-0.85	3.18	2.89		-0.71
GENE726X	IMAGE:85097	104125 PROS1 protein S (alpha) Hs.64016 T74191	1	0	-0.06	-0.38	-0.06	-0.44	-0.93	0.16	0.24	-0.23	0.94	2.19	-0.07	0.57	-0.4	-0.48	-1.57	0.11	-0.53	0.81	-1.45	0.27	-0.08	-0.35	-1.16	-0.33		-0.44	-0.22	1.41	1.31	-1.43	-0.95	1.42	-1.26	-0.38	-0.62	-0.13	-0.4	-0.5	0.11	0.03	0.12	1.34	0.79	-0.89	-1.34
GENE3333X	IMAGE:810521	119146 LMO2 LIM domain only 2 (rhombotin-like 1) Hs.184585 AA464544	1	0.24		0.01	0.53	0.01	-0.39	0.38	-1.1	-0.59	-0.14	-0.26	0.37	0.09	0.07	0.16	-1.92	0.24	-0.63	0.84	-0.01	0	-1.12	-0.08	0.41	-0.1	-0.36	-0.2	-0.06	-0.07	-0.4	-0.71	-0.15	-0.2	-1.36	-0.64	-0.08	-0.17	0.23	-0.1	0.16	-0.62	-0.2	-0.24	0.03	-0.27	-0.94
GENE3646X	IMAGE:712829	161293 LMO2 LIM domain only 2 (rhombotin-like 1) Hs.184585 AA280651	1	0.35	0.19	-0.3		0.46	0.08		-0.43	-0.05	0.4	0.31	0.23	-0.04	0.6	0.28		0.46		1.4	-0.51	-0.4	0.22	-0.87	-0.86	-0.4	-1.06	-1.09	-1.18		-0.17	-0.64	-0.44	-0.17	-1.03	-0.92	-0.33	-0.15	-0.49	-0.2	0.13	-1.19	-0.55	0.18	0.1	-1.39	-0.6
GENE5804X	IMAGE:1842034	312787 ESTs Hs.144139 AI221219	1	-0.41	-0.27	-0.6	-0.18	0.92	-0.48		-0.04	-0.45	0.32	-0.38	-0.97	-0.92	0.21	0.66		1.31		-0.57	-0.84	-0.57	0.08	-0.83	-0.46	-0.1	-0.5	-1.21	-0.94	-0.33	0.12	-0.79		-0.66	-0.39	-0.87	0.46	-0.58	-0.87	0.14	0.34	-0.35	-0.25	-0.46	-0.31		0.24
GENE560X	IMAGE:296492	103150 ESTs Hs.34382 N70209	1		-0.09	-0.09		0.53	0.76	0.22		-0.44	3.44	-0.3	-0.54	-0.28	0.18	0.31		0.34		0.27	-1.83	0.06	-0.43	-0.65	-0.26	-0.49	-0.55	-0.52	-1.64	0.18	0.43	-0.47	-1.11	-0.9	-0.13	-0.67	0.6	0.34	-0.07	-0.04	-0.5	-0.19	-0.18	-0.27	-0.39	-0.96	0.04
GENE2058X	IMAGE:131791	111909 SFRS11 splicing factor, arginine/serine-rich 11 Hs.11482 R24506	1	-0.83	0.28	0.11	0.27	0.2	0.55	0.05	-0.84	-1.01	3.22	-0.12	-0.47	-0.43	0.1	0.18	-1	0.24	0.29	0.26	-1.19	0.29	-0.05	-0.27	-0.44	-0.75	-0.43	-0.53	-1.45	0.38	0.37	-0.26	-1.53	-1.2	-0.27	-0.27	0.45	0.3	0.18	0.07	-0.11	0.7	-0.05	-0.39	-0.85	-0.7	-0.28
GENE895X	IMAGE:1456976	105189 EST Hs.144031 AA862485	1	-0.69	0.49	0.31	0.54	0.46	-0.08	0.96			0.96	0.28	-0.46	-0.73	0.03	0.13		0.59	0.6	-0.35	-0.51	0.66	-0.72	-0.28	-0.23	-0.91	-0.11	-0.52	-0.23	0.31	0.5	-0.12	-1.01	-1.37	-0.38	-0.38	-0.5	-0.5	0.19	0	-0.39	-0.1	-0.15	0.13	-0.04	0.97	0.01
GENE2691X	IMAGE:767819	115478 KIAA0763 KIAA0763 gene product Hs.4764 AA418726	1	-0.35	-0.35	-0.26		-0.08	-0.39	-0.44	-0.22	1.93	-0.09	0.25	0.05	-0.04	-0.27		-0.58	0.49	0.08	-0.92	-0.88	-0.79	-1.17	-1.06	-0.82	0.14	-0.16	-0.99	-1.2	-0.67	-0.05	-0.71	-0.79	-0.11	0.8	-0.99	0.38	0.69	-0.76	-0.73	0.24	-1.04	-0.7	-0.52	0.62	-0.54	-0.18
GENE2324X	IMAGE:341805	113359 MSTP032 MSTP032 protein Hs.274368 W60845	1	-0.82	-0.38	-1.25	0.77	-0.06	0.92	-0.17	-0.57	-0.63	-0.42	-0.01	-0.76	-1	-0.13	-0.12	-0.94	-0.32	0.02	1.38	-0.15	0.06	-0.77	-1.41	-1.23	-1.8	-0.91	-1.95	-1.64	-1.34	-0.67	-0.38	-1.02	-0.48	-1.2	-0.87	-1.15	-0.82	-1.56	-0.84	-0.11	-0.03	1.28	0.2	-0.93	-1.3	-0.6
GENE4364X	IMAGE:759159	223882 RGS5 regulator of G-protein signalling 5 Hs.24950 AA436935	1	-1.02	-0.39	-0.64	0.1	0.27	1.65	0.21	-0.17	-0.79	0.38	1.15	-0.22	-1.09	-0.76	0.1	-0.92	-0.14	-0.19	1.61	0.07	-0.24	-1.17	-0.25		-0.86		-1.97	-0.7		-1.09	-0.2	-0.76	-0.09	-0.97	-0.97	-1.26	-1.2	-1.11	-0.94	-0.5	-0.15	1.47	0.69	-0.19	-0.63	-0.88
GENE4889X	IMAGE:1505692	226739 MSTP032 MSTP032 protein Hs.274368 AA879437	1	-0.76	0.23	-1.22		0.32	1.5	-0.01				0.08	-0.33	-1.36	-0.83	0.16		-0.51	-0.36	0.66	-0.17	-0.42	-1.25		-1.26	-1.29	-1.55	-2.35	-1.67	-0.83	-0.17	0.27	-1.42	-0.03	-0.93	-1.09	-1.06	-0.98	-1.76	-0.84	0.08	-0.09	1.35	0.55	-0.24	-0.73	-0.28
GENE166X	IMAGE:853809	100957 RGS5 regulator of G-protein signalling 5 Hs.24950 AA668470	1	-0.61	-0.21	-0.93	0.27	0.03	1.85	-0.79	-0.83	-0.49	0.42	1.02	-0.37	-0.76	0.14	-0.01	-0.95	0.06	0.43	2.13	0.25	-0.08	-0.53	-1.32	-0.78	-1.14	-1.35	-2.47	-0.93	-0.96	-0.45	-0.17	-1.07	-0.45	-1.67	-1.33	-1.41	-1.02	-1.66	-0.86	-0.16	-0.04	0.89	0.28	-0.54	-1.08	-0.52
GENE3209X	IMAGE:271038	118448 RGS5 regulator of G-protein signalling 5 Hs.24950 N34362	1	-0.44	-0.08	-0.55	0.5	-0.01	2.33	0.55	-0.89	-0.59	0.09	1.22	-0.12	-1.29	-0.43	0.07	-1.08	-0.1	0.09	1.71	0.78	0.51	-0.37	-1.49	-1.32	-1.31	-1.12	-2.18	-0.66	-0.83		0.02	-0.9	-0.37	-1.25	-0.96	-0.56	-1.17	-1.64	-0.58	0.16	0.08	1.2	0.59	-0.47	-0.58	-0.17
GENE6300X	IMAGE:1758233	319583 RGS4 regulator of G-protein signalling 4 Hs.227571 AI220643	1	-0.25	-0.09	-0.74	0.45	-0.03	1.98	-0.15	-1.45	-0.17	-0.84	-0.12	-0.5	-0.34	-0.33	0.07	-0.87	-0.29		1.25	0.37	0.38	-0.34	-1.32	-0.91		-1.58	-1.65	-0.66	-0.56	-0.21	0.14	-1.09	-0.33	-1.17	-1.1		-0.82	-1.47	-0.79	-0.12	0.28	0.74	0.59	-0.42	-0.28	0.13
GENE3432X	IMAGE:346583	119834 KIAA0786 latrophilin Hs.24212 W74533	1	-0.43	0.06	-1.31	-0.09	-0.32	0.53	-0.23		0.11	-0.21	2.32	0	-0.87	-0.54	-0.52	-1.45	-0.39	-0.11	-0.05	0.75	0.01	0.79		-0.36	-0.56	-1	-1.54	-0.24	-0.7	-0.32	-0.6	-1.02	0.65	-0.94	-0.64	1.33	0.01	-0.24	-0.68	0.4	0.56	0.4	-0.28	-0.88	1.37	0.85
GENE3153X	IMAGE:307337	118060 KIAA0758 KIAA0758 protein Hs.22039 N95226	1		0.67	-0.25	0.19	-0.02	0.2	0.43	1.48	0.29	0.25	0.69	-0.52	-0.98	-0.37	0.8	-0.8	-0.13	0.82	0.32	-0.29	-0.02	-0.26	-0.56	-1.42	-0.7	-0.43	-0.56	-0.65	-0.2	0.08	0.03	0.03	0.03	-0.83	0.03	-0.03	-0.18	-0.84		0.4	0.49	0.01	-0.15	-0.07	-0.65	-0.06
GENE6314X	IMAGE:1940641	319768 EST Hs.235734 AI352281	1	-0.14	0.08	-0.65	-0.79	1.1	-0.2	0.11	-1.52	0.24	0.65		0.22	-0.56	0.08	0.75		0.5	-0.31	0.95	-1.07	-0.38	-0.85	-1.04	-1.54	-0.35	-0.46	-0.89	-1.48	-0.44	0.79	0.17	0.18	-0.79		0.78	0.33	0.02	-1.11	-0.25	0.7	0.37	0	-0.05	0.96	-0.54	-0.09
GENE5550X	IMAGE:1588477	310272 CALCRL calcitonin receptor-like Hs.152175 AA975301	1	-0.4	0.42	-0.39	-0.53	0.66	0.22	0.66		0.03	0.03	0.13	-0.29	-0.34	-0.23	2.6		-0.01	-0.04	0.85	-1.05	0.05	-0.28	-0.66	-0.93	-0.13	-0.33	-0.72	-0.73	0.4	-0.13	0.09	-0.44	-0.68	-0.48	-0.36	0.26	-0.07	-0.28	0.31	0.9	0.25	0.24	0.09	-0.2	-0.26	-0.71
GENE6580X	IMAGE:283268	99344 ESTs Hs.201591 N45301	1	-0.39	-0.54	0.07	0.55	0.38	-0.31	0.47		-0.72	-0.66	-0.52	-0.31	-0.35	0.25	2.1	-0.72	-1.04	0.16	-0.17	-0.71	0.27				-0.65	0.18		-0.55	-0.48	-0.61	0.02	0.05	-0.55	-0.14	0.05	-0.6	0.25	-0.38	0.13	0.43	0.55	0.73	0.14	0.5	-0.8	-1.05
GENE2884X	IMAGE:345670	116573 NFYC nuclear transcription factor Y, gamma Hs.168157 W72005	1	0.19	0.34			-0.83	-0.72	0.08	1.76	-0.17		5.04	4.47	-2.03	-1.75	-1.6	-1.02	-1.22		-0.3		2.73	1.68		-1.2	-0.79		-0.9	-0.97	-1.51	-0.64	-0.75	-1.27		-1.55	0.07	0.24	0.12	-0.97	-0.35	0.41	0.46	-0.94	-0.37	-1.94	-0.03	-3
GENE3051X	IMAGE:52339	117428 Homo sapiens cDNA FLJ31097 fis, clone IMR321000210 Hs.8037 H23278	1	-0.54	-0.22	-0.28	-1.17	-0.4	0.4	-1.06	0.16	1.03	0.02	3.09	3.5	-0.38	-0.51	-0.79	-1.13	0.69	-1.03	-1.02	-0.62	-1.04	0.33		0.23	0.1	-0.14	-1.09	0.12	0.2	0.05	-0.42	-0.44	0.35	-1.82	-0.62	1.49	1.29	0.01	-0.41	0.32	-0.35	-0.41	0.02	1.09	-1.58	-1.07
GENE3534X	IMAGE:345123	120432 Homo sapiens cDNA FLJ31097 fis, clone IMR321000210 Hs.8037 W72167	1	0.24			-0.27	-1.05	-0.23	0.14		0.35	-0.78	1.97	3.25	0.31	-0.3	-1.21	-1.3	0.17	-0.91		-0.3	-0.74	0.61	0.13	0.4	0.25	-0.28	0.21		0.15	-0.11	-0.45	-0.48	0.39	-0.94	-0.41	0.92	1.1		0.09	0.41	-0.06	-0.42	-0.19	0.87	-0.75	-1.29
GENE5754X	IMAGE:300099	312147 TSPAN-5 **tetraspan 5 Hs.20709 N77929	1	-0.44		-0.34	-1.56	-0.61	-0.24	0.83	0.36	1.2			4.27	-0.12	-0.3	-0.76	-1.29	1.2		-0.4	-0.78	-1.62	-0.47	0.03		0.34	0.14	-0.79	0.25	-0.28		-0.5	-0.31	0.49	-0.95	-0.73	1.64	1.48	0.81	-0.69	0.24	-0.85	-0.65	0.16	1.52	-1.36	-1.36
GENE581X	IMAGE:359982	103261 BNIP3 BCL2/adenovirus E1B 19kD interacting protein 3 Hs.79428 AA035669	1	-0.02	-0.75	-1.24	-1.11	-0.76	1.22	0.18	1.72	1.14	0.95	1.96	2	3.12	0.56	-1.06	-0.83	-0.32	1.06	0.7	0.04	0.3	0.58	-0.15	-0.13	0.38	-0.7	-0.28	-0.86	-0.4	-0.17	1.43	-0.72	0.21	-0.68	-0.98	0.45	-0.05	0.11	-0.49	0.4	-0.44	-1.03	0.1	0.19	-0.76	-1.61
GENE2313X	IMAGE:783697	113293 BNIP3 BCL2/adenovirus E1B 19kD interacting protein 3 Hs.79428 AA446838	1	-0.33	-1.01	-0.88	-0.42	-1.05	1.5	0.06	1.67	1.59	0.99	2.18	2.26	3.39	-0.55	-0.91	-0.92	-0.92	1.3	0.84	0.02	0.94	0.81	0.13	0.55	0.45	-0.79	-0.41	0.17	-0.75	-0.33	1.73	-0.53	0.65	-1.22	-0.11	-0.42	-0.46	-0.4	-0.98	0.19	-0.29	-1.2	0.58	0.59	-0.61	-1.57
GENE1086X	IMAGE:52128	106301 ESTs, Weakly similar to T26845 hypothetical protein Y43F4B.7 - Caenorhabditis elegans [C.elegans] Hs.292653 H22568	1	0.23		-1	0.31	0.23	0.43	0.88	0.74		-0.02	1.51	1.68	0.53	0.11	-0.2	-0.69	0.69	-0.67	-0.2	-0.21	-0.28	-0.67	-0.77	-0.57	-0.41	-0.08	-1.3	-0.13	-1.91	-0.52	-0.38	-0.01	-0.13	-1.26	-0.44	0.35	0.43	0.04	-0.69	-0.18	-0.69	-0.28	0.86	0.53	-1.15	0.64
GENE1770X	IMAGE:34294	110210 ESTs, Weakly similar to T26845 hypothetical protein Y43F4B.7 - Caenorhabditis elegans [C.elegans] Hs.292653 R24547	1	-0.28	0.44	-0.62	-0.02	0.02	0.23	-0.83	0.62	0.07		1.21	1.53	0.67	-0.17	0.1	-1.04	0.47	-0.66	-0.49	0.44	0.16	0.13	0.18	-0.03	-0.16	-0.06	-0.77		-0.76	-0.68	-1.38	-0.38	-0.1	-1.94	-0.88		0.31	0.42	-0.09	-0.16	-0.82	-0.4	0.75	0.52	-1.21	0.96
GENE3932X	IMAGE:290235	221400 Homo sapiens mRNA for TL132 Hs.234573 N64391	1		0.42	0.65	0.96	-0.35	0.16	-0.44		0.02	0.53	1.4	0.07	0.65	0.19	-0.51	2.51	0.66	0.84		0.53	0.84	-0.39	-0.32	-0.64	0.15	-0.33	-0.78	0.02	-0.51	-0.25	-0.9	-0.58	-0.53	-0.62	0.07	0.21	0.09	-0.25	1.3	0.24	-0.76	-0.68	0.12	-0.28	0.65	-0.65
GENE6124X	IMAGE:1882690	317178 ESTs, Moderately similar to CLC3_HUMAN CHLORIDE CHANNEL PROTEIN 3 [H.sapiens] Hs.171553 AI279105	1		-0.17	-0.12	0.42	0.11	-0.31		0.19	-0.26		0.88		-0.32	0.45		0.76	0.61	0.59	-0.18	-1.54	-0.21	-0.26	-0.88	-0.27	0.09	-0.16	0.43	-0.15	0.43	0.04		-0.74	-0.16	0.3	0.2	0.54	0.56	0.94	-0.15	1.2	-0.85	-1.66	-0.51	0.04	0.12	1.19
GENE655X	IMAGE:135900	103658 KIAA1376 KIAA1376 protein Hs.24684 R33609	1	0.36	0.27	-0.32	0.42	0.45	0.07	-0.37	0.2	-0.47	0.43	-0.12	-0.33	0.17	0	-0.23	0.52	0.81		0.35		-0.59	-0.48	-0.98	-1.3	0.85	0.32	0.32	-1.79	0.24	0.21	0.24	-0.1	-0.33	0.14	0.46	0.78	-0.19	0.01	0.74	0.47	-0.29	-0.41	0.07	0	-0.43	0.62
GENE6161X	IMAGE:1651082	317709 KIAA1376 KIAA1376 protein Hs.24684 AI091540	1	1.27	0.31	-0.31		-0.21	0.69	0.67	-0.64				-0.47	0.37	0.08	0.23		0.33			-0.29	-0.15	-0.26	-0.53	-0.62	1.19	-1.2	0.22	-1.14	0.05	0.81	0.76	0.96	-0.07	0.55	0.34	1.45	0.51			0.58	0.3	-0.2	0.34	0.42	-0.03	1.08
GENE2779X	IMAGE:1031820	116027 ESTs Hs.112747 AA609666	1	0.07	0.51	-0.33	0.02		1.04	1.08	-0.03				-0.18	-0.68	0.34	-0.54		0.27		0.68	-2.29	-0.23	-0.64		0.23	0.56	-0.36	0.5	-0.06	-1.33	-0.15	0.01	0.28	-0.25	0.01	0.37	0.3	0.21	-0.25	0.69	0.33	-0.22	-0.29	-0.47	-0.04	-0.63	-0.29
GENE1547X	IMAGE:71101	108938 PROCR protein C receptor, endothelial (EPCR) Hs.82353 T47442	1	0.29	0.33	0.36	1.32	-0.47	0.12	0.59	0.36	0.01	2.94	-0.26	-0.43	0.32	-0.54	-1.2	-0.37	0.86	0.32	0.82	0.32	-0.51	-0.41	-0.36	-0.41	-0.44	-0.02	0.5	-0.56	-0.04	0.03	-0.62	-0.33	-0.07	-0.37	-0.35	-0.36	0.3	0.2	-0.29	0.08	0.47	0.8	0.31	0.01	0.68	-0.8
GENE549X	IMAGE:767765	103073 GEM GTP binding protein overexpressed in skeletal muscle Hs.79022 AA418077	1	0.1	-0.63	-0.66	0.57	-0.3	0.19	1.09	0.06	0.71	0.77	-1.33	-0.23	-0.61	0.18	-0.65	-0.02	0.16	-0.71	-0.5	-0.86	-0.93	-0.44	-0.58	-0.14	-0.24	0.47	-0.31	-0.49	-0.26	-0.77	-0.57	-0.34	0.44	-0.64	0.03	0.1	0.34	-0.07	-0.39	-0.12	1	0.85	0.9	1.43	1.99
GENE6573X	IMAGE:70203	99321 ESTs Hs.22247 T50020	1	-0.43	0.05	-0.35	0.44	-0.14	-0.34	0.86			0.59		-0.28	-0.49	-0.52	-0.81		0.07	0.55	-0.29	-0.35	-0.95	-0.6	-0.77	-0.32	-0.34	-0.52	-0.51	-0.26	-0.4	-0.97	-0.05	-0.24	-0.07	0.1	0.24	-0.11	-0.48	-0.43	0	-0.39	0.82	-0.12	0.68	0.42
GENE1421X	IMAGE:132307	108244 HEYL hairy/enhancer-of-split related with YRPW motif-like Hs.23823 R25238	1	-0.55	-0.6	-0.39		-0.75	-0.47	0.33	-0.02	0.15	0.98	0.6	0.07		-0.3	-0.67	-0.16	-0.19	0.48	0.67	-0.33	-0.97	-0.52			-0.72	-0.25	-0.76	-0.79	-0.48	-0.86	0.02	-0.45	-0.07	-0.57	-0.27	0	-0.42	-0.2	-0.61	-0.44	0.12	0.52	0.3	0.92	-0.05	0.16
GENE1105X	IMAGE:341310	106432 FRZB frizzled-related protein Hs.153684 W58032	1	0.16	-0.37	-0.21		0.5	-0.41	0.4	0.7	-0.47	-0.48	-0.52	-0.35		-0.94	-0.56		-0.26	-0.09	-0.25	-0.04	-0.19	-1.2	-1.44	-1.15	-1.27	-0.95	-1.27	-1.09	-0.68	-1.4	-0.28	-0.68	-0.76	-0.41	-0.64	-1.3	-1.22	-1.37	-0.71	0.68	-0.26	0.88	0.38	-0.18		-0.74
GENE4179X	IMAGE:877772	222818 MRAS muscle RAS oncogene homolog Hs.349227 AA626777	1	0.55			-0.67	-0.54	-0.52	-0.06	-0.25	-0.21	0.21	0.37	-0.15	-0.59	-0.23	0.08		-0.07	1.95		0.45	1.96	0.19		-0.19		-0.64	-0.12	0.26	0.19	-0.32	0.05	0.06	-0.59	-0.28	-0.32	-0.18		-0.55	0.25	0.29	-0.2	-0.2	-0.32	0.34		-0.61
GENE5466X	IMAGE:286633	309717 IGF1 insulin-like growth factor 1 (somatomedin C) Hs.85112 N67876	1	-0.31	1.13	-0.16		-0.15	-0.5	-0.99	0.7	-0.06	0.2		-0.58	-0.27	0.06	0.39		-0.04	-0.33	-0.34	-0.58	0.13	-0.35	-0.01	-0.33	-0.68	-0.63	-0.8	-0.3	-0.21	0.01	-0.57	-0.47	-0.58	-0.19	0.3	-0.77	0.21	-0.86	-0.15	0.04	-0.17	-0.22	-0.09	-0.37	0.12
GENE1832X	IMAGE:767823	110566 PALMD palmdelphin Hs.14606 AA418728	1	0.18	0.49			0.18	-1.21	-0.02	0.07			-1.48	-0.48	-0.19	-0.54	0.05		-0.12	-0.15	0.11	-0.27	0.43	-0.04	-0.28	-0.37	-0.3	-0.74	-0.08	0.03	-0.49	-0.38	-0.35	-0.19	-0.03	-0.88	-0.05		0	-0.4	-0.74	-0.03	-0.36	0.32	0.03	-0.31	-0.13	-0.45
GENE6519X	IMAGE:35503	99029 C1QR1 complement component 1, q subcomponent, receptor 1 Hs.97199 R14981	1	-0.14	0.78	-0.95	-0.41	0.15	-0.49	0.06	-1.19	-0.3	1.09	-0.89	-1.02	-0.38	0.75	0.34	0.01	-0.2	0.52	0.02	-0.05	0.2	0.12		-0.76	-0.56	-1.14	-0.69	0.23	-0.12	0.04	0.6	0.19	-0.12	-1.21	0.28	-0.61	0.28	-0.9	-0.12	0.43	0.72	-0.22	-0.26	0.47	0.84	-0.68
GENE6603X	IMAGE:796732	99494 FLJ14834 hypothetical protein FLJ14834 Hs.62905 AA460708	1	0.38	0.37	-1.81	1.4	1.08	-0.14	0.53	-0.65	1.33	1.59		0.07	-0.64	-0.61	-0.55	1.41	-0.84	-0.83	-1.08	-0.95	1.21	-1.08	-0.89	-0.75	-0.48	-0.08	-1.39	0.02	-0.98	-1.77	-1.19	-0.71	-0.55	-0.9	0.4	0.6	0.43	-1.13	0.09	0.4	0.66	-0.43	-0.15	1.23	0.92	-0.65
GENE4569X	IMAGE:487928	225023 Homo sapiens mRNA; cDNA DKFZp564O0862 (from clone DKFZp564O0862) Hs.133481 AA045282	1	-0.63	-1	-0.51	-0.14	0.26	-0.73	0.55	0.09	-0.75	0.54			-1.35	-1.26	-0.49		0.19	-0.96				-0.63			0.39	-0.12	-1.23	0.76	-0.34	-1.96	-0.72	-0.7	-0.36	-0.32	-0.38	0.08	0.49	-0.38	0.45	0.48	0.9	0.56	0.06	-0.13
GENE146X	IMAGE:898677	100820 EST Hs.348068 AA494443	1	-0.33	-0.53	-0.35	-0.8	-0.14	-0.67	0.78	0.01	-0.39	-0.16	0.45	-0.13	-0.64	-0.38	-0.78	-0.95	0.28	0.33		-0.62	-0.73	-0.25	0.29	0.1		-0.1	-0.64	-0.01	-0.11	-0.36	-0.11	0.03	-0.17	-0.43	-0.43	-0.2	0.72	-0.53	-0.59	-0.48	-0.01	-0.11	0.29	0.07	-1.62	0.16
GENE299X	IMAGE:76169	101777 Homo sapiens mRNA; cDNA DKFZp586P1622 (from clone DKFZp586P1622) Hs.5897 T59658	1	0.12	0.18	-0.41	-0.46	-0.26	-0.5	0.36	-0.17	-0.49	0.11	-0.58	-0.24		-0.95	-2.17	2.21	1.15	0.09	-0.42	-0.06	-0.73	-0.71	-0.44	-0.35	-0.11	0.88	-1.23	0.12	0.48	0.54	-0.62	-0.33	0.08	-0.93	0.89	0.86	0.23	-0.9	-0.05	0.88	-0.13	-0.12	0.79	0.09	-1.36	-0.76
GENE768X	IMAGE:138444	104356 KIAA1796 KIAA1796 protein Hs.268744 R68272	1	-0.08	0.19	-0.43	0.5	-0.62	-0.5	0.04	-0.96	0.17	-0.08	0.05	2.45	-0.71	-0.51	-1.03		-0.31	-0.06		-0.18	0.13	0.06	-0.7	-0.69		-0.18	-0.17		-0.55	-0.06	-0.35	-0.34	-0.82	-0.76	-0.03	0.28	0.27	-0.29	0.27	0.54	0.82	0.37	-0.17	-0.42	0.39	-0.33
GENE913X	IMAGE:768008	105268 BAG2 BCL2-associated athanogene 2 Hs.55220 AA418744	1	0.53	0.65	0.01	-0.78	0.53	-0.32	-0.43	0.88	0.79	0.7	0.21	1.29	0.56	1.06	0.21	0.9		-0.54	-0.7	-0.76	0.2	0.52		0.48	0.92	0.95	1	-0.03	0.51	0.73	-1.62	0.9	-0.72	0.78	0.75	0.61	0.14	0.82	0.97	0.08	-0.6	-0.53	-0.64	0.87	-0.11	-0.55
GENE289X	IMAGE:144932	101723 CDK2AP1 CDK2-associated protein 1 Hs.3436 R78607	1	-0.1	-0.22	-0.94	-0.09	0.51	0.84	-0.41	0.11	-0.4	0.82	0.6	0.55	0.49	0.42	-0.46	0.77	0.04	1.25	0.8	-0.35	0.97	-0.01	-0.25	-0.06	0.02	-0.14	0.37	-0.08	-0.45	-0.05	0.55	-0.17	-0.47	0.07	0.49	0.79	0.3	0.03	0.56	0.65	-0.18	-0.68	-0.41	-1	0.15	0.17
GENE6050X	IMAGE:1896729	316109 FLJ23399 hypothetical protein FLJ23399 Hs.299883 AI298110	1	-0.42	-0.2	-0.73	-0.15	0.02	-0.25	-0.26	0.22	0.17	0.73	0.29	-0.15		0.67	-0.38	0.47	0.42	1.17	-0.11	-0.45	0.4	-0.07	0.21		0.25	-0.29		-0.3	-0.78	-0.8	-0.52	0.18	-0.04	-0.22	0.09	0.89	0.5	-0.19	0.04	0.61	0.34	-0.12	-0.22	-0.14	0.52	0.19
GENE1244X	IMAGE:34905	107296 FLJ23399 hypothetical protein FLJ23399 Hs.299883 R19895	1	-0.77	-0.22	-0.49	-0.39	-0.19	-0.23	-0.45	-0.17	0.08	1.2	0.16	-0.51	-0.11	0.43	-0.32	0.86	0.37	1.06	0.25	0.3	0.22	0.18	0.29	-0.27	0.34	-0.88	0.81	-0.11	-0.92	-0.35	0.07	0.09	0.24	-0.26	-0.19	1.16	0.78	-0.47	0.09	0.79	0.53	-0.22	-0.23	-0.49	0.43	0.15
GENE5616X	IMAGE:626874	310715 FLJ23399 hypothetical protein FLJ23399 Hs.299883 AA190444	1	-0.07	-0.08	-0.79	-0.69	0.61	0.52	0.21	0.39	-0.23	1.31	0.95	-0.45	0.02	0.78	0.08		0.52	0.81	-0.07	0.11	-0.23	-1.15	-0.4	-0.63	0.18	-1.78	0.77	-0.99	-0.81	-0.27	0.11	0.69	0.4	0.25	-0.63	1.6	0.94			0.58	0.16	0.08	-0.16	-0.26	-0.11	0.39
GENE5770X	IMAGE:2014732	312400 DKFZp762A227 hypothetical protein DKFZp762A227 Hs.274453 AI361349	1	0.24	1.02	-0.22	0.75	0.2	-0.13	1.8	-0.13		0.67	0.31	1.33	0.62	1.01		1.15	1.48	1.86	0.22	-0.24	0.68	-0.15	0.06	0.36	0.72	0.97	1.34	-0.43	-0.87	0.2	0.6	0.27	-0.41	0.16	0.6		0.84	-0.37		0	-0.51	-0.6	0.74	0.66	0.78	-0.16
GENE5618X	IMAGE:725152	310748 DKFZp762A227 hypothetical protein DKFZp762A227 Hs.274453 AA404310	1	0.2	0.83	-0.17	0.7	0.37	-0.28	1.6	-0.26	-0.62	0.33	0.39	1.55	0.39	1.08	0.71		1.42	2.41	0.39	-1.05	0.43	-0.17	0.16	0.52	0.68	1.47	1.43	-0.54	-1.22	-0.73	0.46	0.37	-0.89	0.64	0.73	0.68	0.73	0.14	1.79	-0.2	-1.15	-0.72	0.58	0.61	0.96	-0.39
GENE2784X	IMAGE:284592	116053 DKFZp762A227 hypothetical protein DKFZp762A227 Hs.274453 N64781	1	0.04	0.55	-0.38	0.57	0.18	-0.03	0.54	-0.13	-0.64	0.3	0.19	1.03	0.48	0.93	0.45	0.54	1.48	1.92	0.21	-0.85	-0.07	-0.39	-0.21	0.64	0.75	1.03	1.38	-0.18	-0.38	0.07	0.12	-0.11	-0.53	-0.07	0.6	0.66	0.76	0.16	1.27	-0.2	-1.08	-0.76	0.37	0.21	0.81	-0.56
GENE5306X	IMAGE:1422894	308636 NOTCH2 Notch homolog 2 (Drosophila) Hs.8121 AA827551	1	0.13	0.24	-0.2	-1.05	0.02	0.36	-0.41	0.09	0.58	0.28	0.53	-0.13	0.03	1.07	0.13	0.75	0.6	-0.17	-0.36	-0.14	0.13	-0.44	-0.71		0.14		0.26	0.78	-0.51	0.09	-1.69	-0.42	-0.03	0.8	0.46	0.67	0.51	-0.02	0.34	0.69	0.33	-1.66	0.1	0.24	0.76	0.46
GENE4735X	IMAGE:448085	225985 CLIC4 chloride intracellular channel 4 Hs.25035 AA702702	1	0.33	0.33	-0.69	-0.76	-0.29	0.76	0.13	-0.66	1.02	0.18		0.64	-0.14	0.2	0.42	1.19	-0.51	-0.93		-0.32	-0.23	0.09	-0.04	-0.16	0.6	-0.53	0.44	0.34	-0.34	-0.86	0.96	0.36	-0.55	-1.13	0.47	1.09	-0.02	-0.27	-0.51	1.02	1.19	-0.56	0.79	0.37	1.6	-1.2
GENE4210X	IMAGE:1559001	222968 CLIC4 chloride intracellular channel 4 Hs.25035 AA917861	1	0.35	0.35	-0.65	-0.8	0.04	0.92	1.06	-1.01	1.11	0.47	1.01	0.64	0	0.25	0.4	0.72	-0.48	-0.87	-0.31	-0.1	0.01	-0.67	-0.05	0.91		-0.45	0.47	0.33	-0.85	-1.23	0.97	0.32	-0.61	-0.99	0.7	1.27	0.04	-0.24	-0.26	1.1	0.77	-0.61	0.98	0.5	1.82	-1.41
GENE4692X	IMAGE:868472	225772 CLIC4 chloride intracellular channel 4 Hs.25035 AA634261	1	-0.04	-0.09	-1.51	-0.31	0.43	0.43	0.69	0.22	0.83	0.59	0.76	0.26		0.26		0.61	-0.58	0.04	-0.04	-0.9	-0.58	-0.82	-0.28	0.22	0.37	-0.13	-0.25	-0.24	-1.21	-1.48	-0.05	-0.39	-1.24	-1.42	0.29	0.94	-0.13	-0.38	-0.14	0.89	0.14	-0.86	0.33	-0.09	1.34	-1.51
GENE870X	IMAGE:244637	105063 CRI1 CREBBP/EP300 inhibitory protein 1 Hs.75847 N54914	1	-0.04	0.12	-0.92	0.16	-0.58	0.98	0.76	1.29	0.37	0.92	1.71	0.65	-1.01	0.79	0.45	0.05	0.12	0.9	0.32	-0.81	-0.21	0.29	-1.28	-0.98	-0.32	0.24	-0.99	0.04	-1.88	-1.88	0.35	-1.1	-0.66	-0.12	0.01	0.18	-0.62	-0.38	-0.38	0.4	0.32	0.15	-0.2	0.12	0.59	-0.3
GENE4919X	IMAGE:1568391	226908 PLS3 plastin 3 (T isoform) Hs.4114 AA953747	1	0.26	-0.03	-0.97	0.41	-0.13	0.78	1.07	2		0.73	0.03	0.34	-0.05	0.81	-0.25		0.27		0.45	-1.45	0.49	-1.22	-0.22	-0.17	0.36	-0.49	0.16	-0.98	-2.7	-1.63	0.4	-0.01	-0.71	-2.23	0.18	1.03	1.29	0.47	0.08	0.41	-0.4	-0.54	0.67	0.25	-0.76	-0.4
GENE4357X	IMAGE:133988	223839 FACL4 fatty-acid-Coenzyme A ligase, long-chain 4 Hs.81452 R28548	1	-0.2	0.76	-0.44	0	0.03	-0.09	0.56	1.09	0.3	0.96	0.24	2.97	0.18	0.97	0.17		0.95	0.21	0.45	-1.67	-0.1	-0.83	-1.52	-0.52	0.03	-0.43	2.52	-0.46	-1.67	-1.09	-0.46	0.32	-0.14	0	-0.51	0.48	0.56	0.5	0.41	-0.32	-0.05	-0.94	0.51	0.81	-0.49	0.33
GENE5024X	IMAGE:2018283	306923 ESTs, Highly similar to C39364 GDF-1 embryonic growth factor [H.sapiens] Hs.345184 AI362733	1	0.17		-0.49	-0.39	0.35	0.51	0.74	0.18	0.56	0.45	1.35	1.13	-0.17	0.57	0.74	-0.45	0.13	0.43	0.08	-0.04	-0.07	-1.31	-0.64	0.08	0.33	-0.52	0.25	-0.15	-0.91	-0.77	-0.5	-0.21	-1.22	0.02	-0.47	-0.18	-0.47	0.41		-0.37	-1.52	0.1	-0.4	0.33	-0.3	0.26
GENE1943X	IMAGE:128329	111197 FADS2 fatty acid desaturase 2 Hs.184641 R09913	1	0.03	-0.14	-0.51	1.47	-1.14	1.54	-0.87	-0.23	-0.05	0.58		0.56	0.25	0.33	-1.48	-0.21	0.24	-0.47		-0.72	1.21	-0.64	0.21	1.14	0.78	-0.69	0.14	-0.13	-0.76	-1.22	-0.52	-0.87	-0.09	-0.53	-0.71	-0.16	-0.12	-0.24	-0.42	2.38	-0.08	-0.88	-0.53	-0.38	1.68	-1.17
GENE4754X	IMAGE:590310	226045 Homo sapiens, clone MGC:17393 IMAGE:3914851, mRNA, complete cds Hs.351461 AA156269	1	-0.29			0.23	0.16	0.23	0.79	0.09	-0.26	0.48	2.8	0.62	-0.02	-0.18	-1.73	-0.25	0.03	0.38	0.02	-0.67	-0.32	-0.32	0.11	0.11	-0.3	1.28	0.5	-0.49	0.84	0.71	-0.82	-0.37	-1.02	0.84	-0.41	0.61	1.61	-0.37	0.4	0.55	-0.93	-1.16	0.15	-0.71	2.21	-1.7
GENE607X	IMAGE:83444	103425 SLC10A1 solute carrier family 10 (sodium/bile acid cotransporter family), member 1 Hs.952 T68568	1	-0.04	0.22	-0.18	-0.17	0.21	-0.24	-0.28	-0.11	0.07	0.71	1.3	-0.03	-0.07	-0.03	-0.04	-0.4	0.16	1.03	-0.03	0.5	-0.39	0.13	-0.3	-0.59	-0.56	0.68	0.63	0.42	0.34	0.86	-0.64	0.09	-0.55	-0.91	-0.38	0.65	-0.16	-0.47	0.13	0.68	0.03	0.38	-0.68	-0.17	2.08	-0.26
GENE1234X	IMAGE:586803	107248 PGF placental growth factor, vascular endothelial growth factor-related protein Hs.2894 AA130714	1	0.06	-0.05	-0.27	0.09	0.12	-0.07	-0.41	-0.8	0.05	0.86		0.08	0.08	0.08	-0.05		-0.12	0.89	0.08	0.53	-0.3	-0.14	0	-0.53	-0.25	0.48	0.62	-0.04	0.35	1.47	-0.78	-0.18	-0.06	-0.82	-0.14	0.61	-0.09	-0.16	-0.19	0.56	-0.18	0.57	-0.68	-0.33	2.36	-0.32
GENE2843X	IMAGE:347434	116349 SC65 nucleolar autoantigen (55kD) similar to rat synaptonemal complex protein Hs.207251 W81191	1	-0.28	-0.44	-0.47	0.21	-0.31	0.29	-0.71	0.44	-0.36	3.22	0.23	0.03	0.62	-0.16	-0.44	1.92	0.39	0.13	0.29	0.78	0.77	0.45	0.38	-0.1	-0.03	-0.13	-0.31	0.19	-0.25	0.14	-0.6	-0.14	-0.1	-0.05	-0.39	-0.29		-0.12	0.13	0.22	-0.03	-0.13	-0.02	-0.25	0.71	1.45
GENE2977X	IMAGE:32231	117004 FLJ12442 hypothetical protein FLJ12442 Hs.84753 R17469	1	-0.05	0.23	-0.06	-0.44	0.24	1.03	-0.58	-0.45	0.31	1.16	1.52	-0.22	1.07	0.41	-0.16	0.63	0.75	0.18	0.41	1.05	-0.04	-0.58	0.69	0.31	0.68		0.32	0.01	0.24	-0.04	-0.09	-0.08	-0.53	0.93	0.17	-0.43	0.14	0	0.15	-0.34	-0.16	-1.03	-0.44	0.08	1.85	1.96
GENE359X	IMAGE:897592	102118 FLJ22041 hypothetical protein FLJ22041 similar to FK506 binding proteins Hs.3849 AA496836	1	1.15		-0.42	-0.41	-0.23	1.85	0.05	1.74		2.38	1.21		1.92	0.07	-0.94	-0.38	0.75		-0.11	0.06	1.66	-0.83	0.01	-0.24		-0.19	-0.45	-1.21	-1.12	-0.68	-0.8	-0.67	0.17	1.24	-0.65	0.27	0.66	-0.35	-0.31	-0.27	-0.87	0.01		1.18	0.94	2.28
GENE4773X	IMAGE:266135	226115 ESTs, Highly similar to S21424 nestin [H.sapiens] Hs.127356 N21633	1	-0.8	0.15	-1.04	-0.37	-0.03	1.39	0.57			1.32	2.75	0.96	0	1.06		-0.82	-0.26	-0.15	0.49	-0.29	0.26	-0.14	-0.41	-0.29	-0.15	1.17	-0.81	-0.99	-0.52	0.06	0.04	-0.61	0.41	1.82	-0.1	0.07	1.16	-0.95	0.11	0.32	-0.69	-0.16	-0.68	0.96	1.31	-0.37
GENE4542X	IMAGE:347268	224870 FLJ21841 hypothetical protein FLJ21841 Hs.29076 W80791	1	-1.3	0.13	-1.02		-0.43	0.67	-0.73	0.84	0.7	1.5	2.9	0.54	-0.52	1.2	-0.15	-1.05	-0.52	0	0.08	0.01	0.17	0.41	-0.1	-1.17	-0.68	1.07	-0.45	-0.88	-0.83	-0.29	-0.58	-0.89	-0.16	1.42	-0.02	-0.24	1.05	-1.29	-0.9	-0.1	-0.75	-0.4	-0.54	0.79	1.18	-0.55
GENE4707X	IMAGE:49569	225849 KIAA1026 KIAA1026 protein Hs.293780 H15115	1	-0.25	0.21	-0.41	0.04	0.29	0.28	-0.35		1.29	0.96	0.84	-0.05	0	-0.04	-0.98	-1.52	0.09		0.22	0.18	0.32	-0.26	-0.49	-0.7	-0.13	-0.27	0.45	-0.35	-0.07	-0.21	0.1	-0.8	-0.1	0.53	-0.12	-0.16	0.23	0.22	-0.14	0.1	-0.45	0.13	-0.11	-0.48	0.71	0.49
GENE4291X	IMAGE:854570	223412 Homo sapiens, Similar to TEA domain family member 2, clone MGC:15481 IMAGE:2967735, mRNA, complete cds Hs.166556 AA669124	1	-0.36	0.04	-1.06	0.18	0.65	1.15	0.76	2.03	0.5	0.62	1.01	-1.26	0.53	0.36			-0.51		-0.05	-0.7	0.17	-0.2	-0.34	-1.16	-0.06	-1.08	0.23	-0.14	-0.97	-0.51	0.1	-0.49	-0.42	1.1	0	0.18	-0.47	0.14		0.37	-0.59	-0.2		-0.07	1.42	0.64
GENE3778X	IMAGE:878438	220450 Homo sapiens, Similar to TEA domain family member 2, clone MGC:15481 IMAGE:2967735, mRNA, complete cds Hs.166556 AA670362	1	-0.34	0.06	-0.61	0.17	0.37	0.95	0.88	1.82	1.51	0.67	1.12	-0.04	0.28	0.1	0.11	-1.93	-0.6	0.44	-0.28	0.26	0.89	-0.05	0	-0.04		-0.8	0.24	0.67	-0.67	-0.76	0.52	-0.47	-0.11	1.32	0.71	-0.05	-1.08	0.36	-0.19	0.31	0.53	0.22	-0.03	-0.06	1.51	0.98
GENE5524X	IMAGE:1475968	310109 Homo sapiens, Similar to TEA domain family member 2, clone MGC:15481 IMAGE:2967735, mRNA, complete cds Hs.166556 AA872977	1	-0.3	0.25	-0.38	0.58	0.13	0.69	0.11	1.66	1.9	1.12	1.75	-0.46	0.39	0.37	0.27		-0.15		0.16	0.37	1.05	0.27	-0.11	-1.17	-0.33	-0.71	0.45	0.82	-0.57	-0.36	0.39	-0.01	-0.17	1.07	0.25	-0.24	-0.43	0.32	-0.25	0.23	0.07	0.23	-0.11	0.18	1.51	0.73
GENE4025X	IMAGE:39995	221989 SEMA4C sema domain, immunoglobulin domain (Ig), transmembrane domain (TM) and short cytoplasmic domain, (semaphorin) 4C Hs.7188 R54587	1	0.19	-0.17	-1.43	-1.18	-0.2	0.28	-0.53	1.72	0.69	0.05	2.3	-0.34	0.04	0.19	0.51	-1.19	-0.09	0.48	-0.77	0.34	-0.02	-0.06	0.64	-0.11	-0.09	0.22	0.32	0.25	-0.07	0.61	-0.4	-0.29	-0.24	0.48	0.01	0.54	0.96	-0.43	-0.12	0.53	0.34	0.11	-0.56	-0.27	1.45	0.56
GENE3047X	IMAGE:811059	117411 RAB34 RAB34, member RAS oncogene family Hs.301853 AA485449	1	0.02	-0.65	-1.3	-0.36	-0.08	1.14	-1.37	2.35	0.14	1.13	1.85	-1.06	-0.47	-0.4	-1.38	-1.47	0.84	-0.96	-1.01	0.26	0.84	-0.76	-0.32	-0.57	-0.3	-0.83	-1	-0.42	0.1	0.28	0.04	0.95	-0.02	0.17	0.49	0.44	1.16	0.63	-0.59	-0.06	0.35	0.6	-0.92	-1.15	1.25	0.71
GENE5239X	IMAGE:811054	308218 GNA12 guanine nucleotide binding protein (G protein) alpha 12 Hs.182874 AA485431	1	0.04	-0.1	-0.64	-0.49	0.21		-0.67	1.37	0.16	0.57	1.37	0.17	0.07	0.53	-0.16	0.22	0.19		-0.37	0.15	-0.04	-0.06	-0.5	-0.46	-0.12	-0.27	-0.73	0.08	-0.31	-0.16	-0.02	0.44	-0.91	0.26	-0.28	-0.11	0.41	-0.31	-0.01	0.17	0.19	-0.15	0.03	-0.14	1.42	0.25
GENE2098X	IMAGE:838982	112123 LOC51339 heptacellular carcinoma novel gene-3 protein Hs.48950 AA487274	1	-0.46			-0.03	0.17	-0.66	0.03	0.05	0.65		0.74	0.1	-0.9	-0.39	-1.37		-0.15		-0.27		-0.41	0.54	-0.52	-0.89	-0.21	-0.32	-0.85		-1.03	-0.82	-0.88	-0.17	-1	-0.74	0.28	0.21	-0.14	-0.78	0.15		0.15		-0.02	-0.13	-0.14	-0.08
GENE4269X	IMAGE:1526826	223306 HOXB2 homeo box B2 Hs.2733 AA911661	1	-0.01	0.79	0.67	-0.43	-0.23	0.55	1.64	-0.42	-0.01		-0.64	-0.6	1.18	-0.36	-1.3	-0.93	0.93	-0.42	-0.1	-1.4	0.22	-0.92	0.08		-0.73		-1.47	-0.47	-0.78	-0.45	-0.19	-0.72	-0.97	-1.49	0.4	0.34	2.02	-0.34	1.09	0.3	-0.81	0.91	0.42	0.47	0.73	-0.42
GENE172X	IMAGE:309499	101017 C7orf10 chromosome 7 open reading frame 10 Hs.114611 N99256	1	0.66	-0.5	0.27		0.17	-0.39	0.36	1.38			-0.76	0.24	0.6		-0.55		0.76	-1.04	-0.93	0.09	-1.43	0.1	0.57	0.61	0.76	0.92	-0.11	-0.88	0.46	0.53	-1.43	-0.88	-0.19	-1.35	-0.18	1.25	1.1	0.77	0.04	0.77	-0.08	-0.67	0.51	-0.12	0.12	-1.55
GENE3237X	IMAGE:505573	118637 PYGL **phosphorylase, glycogen; liver (Hers disease, glycogen storage disease type VI) Hs.771 AA147640	1	0.33	0.2	0.21	-0.81	0.37	-0.96	-0.35	-0.36	0.35	2.01	1.61	1.17	-0.4	-0.59	0.02	-0.35	-0.76	-0.35	-0.87	0.06	-0.19	0	-0.3	-0.51	0.12	0.07	-0.59	-0.62	-0.5	-0.77	-1.1	-0.06	-0.42	-1.17	0.76	0.85	1.63	-0.16	-0.11	0.3	-0.58	0.31	0.05	-0.4	0.46	0.19
GENE839X	IMAGE:241705	104842 PYGL phosphorylase, glycogen; liver (Hers disease, glycogen storage disease type VI) Hs.771 H91680	1	-0.19	-0.14	-0.88	-0.79	0.12		-0.32	-0.08	0.94		2.76	1.93	-0.06	0.53	0.13	-0.44	0.47	-0.08	-0.41	-0.35	0.01	0.05	0.13	-0.02	0.53	-0.35	-0.78	-0.18	-0.83	-0.31	-0.47	-0.41	0.25	-0.87	1.23	1.11	2.6	0.18	-0.47	0.6	-0.09	0.14	0.38	-0.63	0.93	-1.13
GENE2704X	IMAGE:768299	115567 ZFP36L1 **zinc finger protein 36, C3H type-like 1 Hs.85155 AA424743	1	-0.12	0.05	-0.12	-0.72	-0.01	0.18	-1.05	0.49	-0.31	1.08	-0.48	-1.22	0.39	0.66	-0.82	-0.23	0.49	0.75	-0.33	-1.08	-0.25	-0.57	0.33	-0.18	0.85	0.66	-0.59	-0.72	-0.29	-0.17	-1.03	0.12	0.04	1.22	0.43	0.9	0.65	-0.01	0	1.35	-0.27	-0.27	-0.21	0.15	0.02	-1.01
GENE716X	IMAGE:413633	104080 ZFP36L1 zinc finger protein 36, C3H type-like 1 Hs.85155 AA723035	1	-0.09	0.11	0.06	-0.71	-0.08	0.16	-1.23	0.4	-0.23	1.56	-0.07	-0.97	0.43	0.44	-0.73	-0.16	0.5	0.83	-0.35	-1.05	-0.26	-0.67	0.22	-0.1	1.26	0.79	-0.54	-0.46	-0.32	0	-0.77	0.36	0.33	1.3	0.56	0.99	0.7	0.25	-0.2	1.43	0.05	-0.24	0.18	0.43	0.3	-0.85
GENE5989X	IMAGE:1909457	315250 SPUVE protease, serine, 23 Hs.25338 AI299995	1	0.61		-0.47	-0.66	-0.12	0.91	1	0.76		1.81	1.2	0.13	-0.84	2.67	1.96	0.82	0.03	0.66	0.4	-0.76	0.27	0.59	-0.28	-0.62	-0.27	-0.15	-0.67	-0.09	-0.45	0.15	-0.26	-0.45	-0.25	-0.51	-0.09	2.39	0.79	-0.4	-0.06	0.22	0.37	-0.42	-0.12	0.27	-0.92	-0.69
GENE6612X	IMAGE:143887	99531 SPUVE protease, serine, 23 Hs.25338 R76394	1	0.19	0.49	-0.87	-0.91	-0.47	0.79	0.07	0.5	0.21	1.29	1.2	-0.29	-0.91	2.68	1.97	0.53	-0.26	1.02	-0.24	-0.7	-0.38	0.96	0.06	-0.87	-0.5	0.06	-0.86	-0.24	-0.53	-0.47	-0.76	-0.73	-0.4	-0.72	-0.55	2.52	0.99	-0.79	-0.01	0.46	0.3	-1	-0.24	0.08	-1.23	-1.02
GENE845X	IMAGE:782547	104877 SPUVE protease, serine, 23 Hs.25338 AA431796	1	-0.23	0.25	-0.77	-0.65	-0.31	0.81	0.7	0.47	-0.42	1.18	-0.19	0.18	-0.4	2.26	2.08	0.05	-0.27	0.57	-0.25	-0.77	-0.76	0.78	-0.08		-0.24	0.14	-0.73	-0.08	-0.27	-0.56	-0.56	-0.44	-0.38	0.02	-0.33	2.71	1.24	0.14	0.07	0.38	0.7	-0.89	0.12	0.19	-0.67	-1.36
GENE11X	IMAGE:377461	100059 CAV1 caveolin 1, caveolae protein, 22kD Hs.74034 AA055368	1	0.2	0.55	-1.42	0.04	-0.32	-0.65	-0.48	-1.61	0.14	0.21	0.25	-0.33	-1.13	-0.57	-0.59	-0.17	-0.37	0.62	0.59	-0.66	-0.92	0	-0.4	-0.18	-0.11	-1.42	-1.08	-0.3	-1.1	-0.97	-1.14	-0.92	-1.17	3.41	-0.28	3.57	3.15	2.17	-0.38	0.36	-0.17	-0.98	-0.44	-0.31	-1.02	-1.64
GENE2530X	IMAGE:841664	114580 CAV1 caveolin 1, caveolae protein, 22kD Hs.74034 AA487560	1	0.18	0.34	-1.15	-0.23	0.21	-1.1	-0.65	-1.27	0		-0.6	-0.53	-1.01	-0.49	-0.44	-0.38	-0.12	0.51	0.43	-0.43	-0.54	0.15	-0.08	-0.52	-0.16	-0.4	-1.73	-0.43	-0.88	-0.73	-1.04	-0.72	-1.24	2.68	-0.39	2.73	2.48	1.62	-0.2	0.52	0	-0.39	-0.48	-0.67	-1.16	-1.25
GENE2859X	IMAGE:208375	116433 CAV2 caveolin 2 Hs.139851 H62778	1	-0.2	-0.03	-1.22	-0.41	-0.35	-0.56	-0.76	-0.47	-0.59	-0.02	0.41	-0.68	-0.59	-0.59	-0.76	-1.37	0.08	0.93	0.25	-0.52	0.01		0.23	-0.11	-0.37	0.28	-0.92	0.15	0.48	0.54	0.17	-0.47	-0.47	-1.04	1.01	2.61	2.89	1.96	0.73	0.36	0.11	-0.08	0.75	0	-1.11	-1.2
GENE3290X	IMAGE:840984	118913 CAV2 caveolin 2 Hs.139851 AA486567	1	-0.24	-0.07		-0.22	-0.38	-0.56	-0.79	-0.25	-0.74	0.39	-0.62	-0.06	-1.06	-0.28	-0.34	-0.91	0.29	0.93		-0.56	-0.05	-0.36		-0.5	-0.4	0.26	-1		0.18	0.24	0.49	-1.16	-0.84	-1.28	0.91	2.58	2.87	2.11	0.17	0.49	0.23	-0.47	0.82	-0.26		-1.25
GENE2631X	IMAGE:110467	115140 CAV2 caveolin 2 Hs.139851 T84152	1	0.04	0	-1.74	-0.09	-0.24	-0.31	0.28	0.25	-0.03	0.92	0.02	0.28	-1.22	-0.4	-0.8	-1.06	0.81	1.46	0.48	-0.92	-0.04	-1.43	-0.29	-0.13		0.84	-0.93	0.49	0.09	0.66	0.66	-0.88	-0.72	-1.56	1.44	3.3	3.18	2.68		1.05	0.19	-0.63	1.51	0.32	-1.54	-1.43
GENE5332X	IMAGE:1946448	308842 CAV2 caveolin 2 Hs.139851 AI339434	1	0.05	0.11	-1.85	-0.31	0.01	-0.26	-0.03	0.33		1.2	0.28	0.34	-1.01	0.22	-0.56		1.27	2.16	0.52	-1.26	-0.18	-0.89	-0.77	-0.53	-0.26	1.17	-0.31	0.16	0.05	0.66	0.79	-1.31	-0.57	-1.66	1.31	3.53	3.39	2.91	0.61	1.47	-0.05	-0.44	1.42	0.12	-1.68	-1.37
GENE2177X	IMAGE:897910	112583 OSF-2 osteoblast specific factor 2 (fasciclin I-like) Hs.136348 AA598653	1	-0.31	0.12	-2.21	-0.13	0.02	-1.38	0.99	-0.09	0.05	1.07	0.27	-0.47	0.35	1.11	-2.3	0.23	-1.23	0.51	-0.58	-0.89	-2.84	0.35	0.8	-0.22	1.15	0.9	0.04	0.88	0.61	-0.17	-1.53	1.01	-0.71	-1.12	0.58	1.53	1.09	1.89	1.31	2.06	1.38	-0.1	0.06	0.52	-1.66	-1.89
GENE5314X	IMAGE:2028722	308692 OSF-2 osteoblast specific factor 2 (fasciclin I-like) Hs.136348 AI262129	1	0.02	0.09	-2.39	-0.34	0.06	-0.64	1.88	0.25	0.58	1.61	0.43	0.04	0.16	1.53	-1.56	0.58	-0.63	0.38	-0.27	-0.5	-2.23	-1.34	0.52	-0.02	1.23	-0.34	0.23	0.28	0.15	0.39	-1.21	1.03	-1	-0.73	0.47	1.81	1.27	1.65	1.38	2.02	1.2	-0.1	-0.16	0.65	-1.81	-1.22
GENE2549X	IMAGE:137984	114686 ESTs Hs.30343 R63085	1		0.47		0.08	0.48	-0.64	0.32	-1.31	-0.45	0.07	0.02	0.11	0.09	0.49	0.08	0.21	-0.56	-0.77		-0.76	-0.29	0.23		-0.01		-0.4	0.01	1.16	-0.07	-0.52	-1.67	0.09	-0.71	-1.19	-0.41	0.13	0.72	0.36	1.07	0.61	-0.16	-0.5	0.6	0.95	-0.85	1.58
GENE6484X	IMAGE:151477	98814 ESTs Hs.30343 H02837	1	-0.18	0.72	0.05	-0.18	0.27	-0.79	0.13		0.16	0.46	-0.04	-0.17	0.3	0.59	0.02	0.32	0.11	-0.4	-0.48	-0.67	-0.66	0.16	0.47	0	-0.14	0.35	-0.32	0.12	-0.15	-1.06	-1.33	0.22	-0.58	-1.17	-0.69		0.68	0.28	0.73	0.34	-0.46	-0.27	0.38	0.89	-0.64	1.59
GENE2294X	IMAGE:770059	113206 HSPG2 heparan sulfate proteoglycan 2 (perlecan) Hs.211573 AA427561	1	0.17	-0.06	-0.61	-0.45	-0.31	-1.05	-1.35	0.4	0.33	0.46	0.71	-0.43	-0.53	-0.39	-1.01	0.14	0.51	0.89	0.22	0.02	-0.73	-0.5	0.16	0.59	0.03	-0.35	0.61	-0.05	-0.72	-0.39	-0.2	-0.12	-0.95	-0.38	-0.36	-0.06	0.26	-1.18	-0.91	0.71	-0.24	-0.17	-0.09	-0.37	-0.96	1.15
GENE1963X	IMAGE:809507	111350 FLJ20568 hypothetical protein FLJ20568 Hs.279581 AA454563	1	0	-0.45	-0.32	-0.04		-0.12	-0.6	1.19	0.26	0.99	-0.14	-0.67	-0.04	-0.31	-0.56	-0.22	-0.12	1.32	0.4	-0.18	0.48	-0.39	-0.08	0.05	-0.14	0.11		-0.1	-0.12	-0.08	-0.01	-0.21	-0.67	-0.52	-0.54	0.18	0	0.36	-0.56	0.11	0.33	0.28	-0.36	-0.52	-0.57	0.18
GENE5537X	IMAGE:1734754	310171 HSU47926 hypothetical protein B Hs.46458 AI183964	1	0.31	-0.24	-0.63	-0.03	0.09	0.77	-0.41	0	0.93	0.97	-0.15	-0.24	-0.16	-0.73	-1.18	-1.2	-0.11	-0.55	-0.91	0.54	0.51	-0.55	0.53	0.24	-0.11	0.68	1.18	0.79	0.07	-0.19	-0.61	0.77	-0.7	-0.96	-0.14	-0.15	-0.11	0.35	-0.3	0.35	0.73	0.28	-0.49	-0.72	-0.12	1.4
GENE114X	IMAGE:823859	100605 GJB2 gap junction protein, beta 2, 26kD (connexin 26) Hs.323733 AA490466	1	0.81	0.07	-0.71	-0.33	0.12	0.53	0.17	0.61	0.29	0.52	-0.49	-0.61	-0.67	0.09	-0.69	0.25	0.88	0.93	0.34	0.58	-1.57	-0.43	-0.17	0.06	0.01	0.37	-0.44	0.13	-0.05	-0.53	0.57	1.44	-0.08	-1.21	0.68	0.99	1.48	-0.3	0.6	1.54	0.55	0.11	0.44	-1.11	-1.24	-1.66
GENE2852X	IMAGE:787851	116402 PRO2893 hypothetical protein PRO2893 Hs.283072 AA452145	1	0.42	0	-0.7	-0.18	0.26	1.79	-0.36		-0.31			-0.85	-0.04	-0.17	-0.18	-1.32	-0.65	1.09	-1.18	-0.44	0.57	0.23	0.05	0.3	0.13	0.04	0.68	0.13	-0.33	-0.87	1.58	-0.39	-0.12	-0.61	0.17	1.1	0.41	0.1	0.64	0.98	0.02	0.11	0.37	-0.64	-0.11	1.96
GENE3599X	IMAGE:46561	120819 LZTS1 leucine zipper, putative tumor suppressor 1 Hs.93605 H09757	1	0.1	-0.08	-0.44	-0.29	-0.1	0	-0.61	-0.52	-0.12		0.73	-0.37	0.05	0.68	-0.71		0.26		-0.39	0.36	-0.29	0.61	0.6	-0.46	0.15	0.16	0.56	0.53	0.17	0.13	0.07	0.03	-0.35	-0.56	-0.03	0.43	0.3	-0.34	-0.29	0.36	0.47	0.42	0.23	0.24	-0.79	-0.2
GENE2390X	IMAGE:839081	113751 HELO1 homolog of yeast long chain polyunsaturated fatty acid elongation enzyme 2 Hs.250175 AA487608	1	0.45	-0.34	-0.25	-0.58	0.31	0.7	-0.51	1.62	1.42	1.9	1.25	1.63	-1.03	-0.11	-0.59	-0.51	0.76	-0.44	-0.65	-0.7	0.4	0.58	-0.84	0.28	-0.53	-1	-1.52	-0.44	-1.01	-1.18	-1	-0.89	-1.44	-1.96	-1	0.77	1.2	0.29	-0.62	1.28	0.98	-0.57	-1	0.38	0.21	-1.23
GENE1611X	IMAGE:151055	109260 HELO1 homolog of yeast long chain polyunsaturated fatty acid elongation enzyme 2 Hs.250175 H02230	1	0.6	-0.68	-0.24	-0.38	0.09	1.25	0.6	1.47	1.78	1.81	1.04	1.91	-0.2	0.14	-0.32		0.72	-0.64	-0.49	-0.76	0.35	0.04	0.14	1.02		-1.21	-1	-0.19	-0.93	-1.39	-0.78	-0.53	-1.13	-1.63	-0.53	0.79	1.11	0.7	-0.79	1.31	1.06	-0.87	-0.64	0.84	0.56	-1.48
GENE2849X	IMAGE:347036	116385 LEF1 lymphoid enhancer-binding factor 1 Hs.44865 W81128	1	0.37	-0.63	0.12	-0.01	-0.49	-0.88	0.11	0.24	0.4	1.28	1.18	1.18	0.42	0.68	-1.48	-1.81	0.7	-0.57	1.08	-0.8	-1	0.07	0.65	0.77		-0.16	-0.37	-0.15	0.09	0.34	-0.98	-0.9	-0.72	-1.42	-0.31	0.12	0.34	0.08		0.02	0.16	-0.67	0.02	0.52	-0.94	-0.72
GENE4682X	IMAGE:854678	225740 DKFZP566J091 hypothetical protein DKFZp566J091 Hs.57209 AA630084	1	0.33	-0.45	-0.36	0.93	-0.29	-0.18	0.32	-0.55	0.32	1.17	1.42	-0.62	-0.7	-0.43	-0.56	-0.8	-0.04	0.98	0.44	-0.36	0.34	-0.47	0.25	-0.63	-0.36	-0.74	1.27	-0.44	-0.61	-0.69	-0.46	-0.69	-0.49	-0.73	-0.15	1.17	-0.16	-0.65	-0.04	0.43	0.86	-0.74	0.23	0.36	-0.76	-1.12
GENE3583X	IMAGE:67187	120713 FGG fibrinogen, gamma polypeptide Hs.75431 T52651	1	0.16	0.48	-0.03	-1.14	-0.74	-0.6	0		-0.56	-0.63		-0.96	-0.21	0.63	-0.48		-0.2	1.02	0.82	1.18	0.56	-0.07	-0.53	-0.01	-0.27	-0.78	-0.8	-0.28	-1.42	-1.16	0.89	0.22	-0.41	-0.16	0.77	0.77	0.32	0.19	-0.11	0.82	-0.2	-0.69	-0.41	-0.15	0.81	-1.05
GENE293X	IMAGE:782193	101749 TXN thioredoxin Hs.76136 AA431967	1	-0.14	0.2	-0.59	-0.37	0.17	0.25	-0.68	-0.76	0.43		-0.15	-0.04	0.55	0.24	-0.89		-0.02	0.5	-0.16	-0.03		-0.32	-0.28	-0.25	-0.74	-0.44	-0.43	-0.39	-0.07	0.02	-0.08	0.2	-0.61	-0.2	0.15	0.66	0.5	0.05	0.11	1.08	0.27	-0.25	0.5	-0.08	1.14	-1.41
GENE74X	IMAGE:786680	100393 ANXA5 annexin A5 Hs.300711 AA451895	1	0.35	-0.1	-1.48	-0.07	0.29	0.7	0.27	0.41	0.08	0.38	0.04	0.56	0.33	-0.59	-1.72	-0.9	0.63	0.54	0.08	0.47	-0.88	-0.36	-0.28	0.24	-0.15	-0.68	-0.32	-0.08	-0.76	-0.93	0.63	0.59	-0.48	0.16	0.66	1.15	0.2	0.57	0.03	0.59	0.14	-0.33	0.35	0	-0.21	0.39
GENE5810X	IMAGE:1864584	312877 EST Hs.145741 AI269079	1	0.62	-0.11	-1.52	0.11	0.31	0.79	-0.22	0.43	-0.19	0.42	-0.12	0.34	0.47	-0.53	-1.66	-0.97	0.71	0.28	0.29	0.32	-0.85	-0.55	0.19	0.27	0.03	-0.39	-0.36	-0.14	-1.12	-1.12	0.42	0.37	-0.72	-0.3	0.79	0.94	0.24	-0.03	-0.27	0.7	0.14	-0.35	0.29	-0.16	-0.28	0.43
GENE2275X	IMAGE:916559	113121 AA573736	1	0.72	-0.09	-1.46	-0.11	-0.15	0.59	-0.65	0.47	0.1	0.37		0.55	0.23	-0.3	-1.54	-0.7	0.75	0.45		0.4	-0.68	0.25	-0.05	-0.39	-0.12	-0.86	-0.13	-0.3	-1.12	-0.87	0.5	0.16	-0.8	0.22	0.69	1.07	0.26	0.02	-0.05	0.67	0.24	-0.15	0.22	-0.03	-0.41	0.49
GENE2907X	IMAGE:301122	116682 ECM1 extracellular matrix protein 1 Hs.81071 N79484	1	0.5	0.82	-1.02	-1.02	-0.81	-0.9	0.18	1.27	0.06	1.2	2.96	0.51	0.26	0.25	-0.86	0.79	0.59	3.34	0.49	0.19	-0.9	0.95	0.16	1	0.44	0.1	-0.43	0.31	-1.56	-0.72	-0.19	-0.44	1.35	-0.93	0.07	0.24	0.13	-0.24	0.52	2.2	0.36	0.39	0.52	-0.7	-1.66	-1.49
GENE2405X	IMAGE:502664	113819 RIS1 Ras-induced senescence 1 Hs.35861 AA125792	1	0.72	0	-2.27	-0.57	-0.03	1.88		-0.92	0.5	0.8	0.34	0.73	-0.51	-0.11	-0.48	1.06	-0.57	1.32		-0.6	-0.55	0.44	0.41	0.39	0.67	-0.22	-0.34	0.7	-1.56	-0.61		0.19	-0.24	0.03	-0.26	0.77	0.64	0.5	1.18	0.75	-0.01	-0.35	-0.64	-0.51	-0.32
GENE5485X	IMAGE:341840	309887 ESTs Hs.135255 W60649	1	0.48	0.45		-0.63	0.06	-0.68	-0.34	-0.16	0.37	1.68	0.26	-0.59	-0.24	-0.16	-1.24	-1.07	-0.37		2.23	-0.43	0	1.56	0.23	-0.58	0.17	-0.74	0.39	0.1	-0.38	0.02	0.06	0.04		-0.93			-0.16	0.15	0.3	0.83	0.34	0.04	-0.44	-0.86	-0.35	-1.45
GENE1896X	IMAGE:141361	110939 LOC51334 mesenchymal stem cell protein DSC54 Hs.157461 R63841	1	0.36	0.13	-0.47	-0.58	0.11	-0.88	0.23		0.25	1.33	0.57	-0.17	-0.62	-0.33	-1.11	0.04		0.14	0.44	0	0.02	0.48	0.38	-0.32	0.51	-0.62	-0.37	0.9	-1.08	0.19	0.32	0.31	-0.25	-0.73	0.17	1.31	0.02	-0.25	0.06	0.84	0.79	0.83	-0.3	-1.16	-0.51	-1.51
GENE4572X	IMAGE:306466	225041 Homo sapiens cDNA FLJ31588 fis, clone NT2RI2002252 Hs.132986 N92724	1	0.09		-0.22	-0.87	-0.12	-0.46	0.32	-0.36				-0.4	-0.45	-0.09	-1.19		0.32		0.44	-0.8	0.04	-0.57	0.15	0.2	-0.11	-0.56	-1.39	0.03	-1.01	-0.08	-0.32	-0.09	-0.24	0.08	0.41	1.42	1.12	-0.35	0.45	0.35	-0.21	-0.06	-0.65	-0.11	0	-0.83
GENE5569X	IMAGE:38925	310401 ESTs Hs.13233 R51593	1	-0.23	0.18		-0.48	0.07	-0.67		0.6	0.59	1.75	1.73	0.52	0.01	0.29	-0.65		0.39	0.34	0.4	0.07	0.95	-0.34	0.14	-0.55	-0.38	0.14	-0.05	-0.6	-0.89	-0.19	-0.46	-1.33	-1.02	2.25	1.14	1.08	1.38	-0.32	0.18	0.22	0.68	-0.64		-0.01	0.49	-1.18
GENE6248X	IMAGE:1914684	318758 EST Hs.228301 AI310519	1	0.28	-0.04	-0.2	-0.22	-0.51	-0.71	-0.47	-0.32	0.3	1.22	0.79	1.17	1.64	1.55	-1.28	0.55	0.19	-0.25	0.41	-0.1	0.61	0.08	0.06	-0.45	0.3	0.54	-0.48	0.31	-0.79	-0.24	-0.87	-0.35	-0.48	0.57	0.14	0.83	0.31	-0.16	0.18	0.78	-0.3	0.05	-0.07	-0.34	0.07	-0.35
GENE1521X	IMAGE:770859	108807 ITGB5 integrin, beta 5 Hs.149846 AA434397	1	0.22	0.36	-0.27	-0.66	-0.09	-0.52	0.79	0.66	-0.16	0.79	0.41	0.41		0.39		0.68	0.87	-0.36	0.24	0.58	0.91	-0.21	-0.22	0.07	0.09	0.01		0.43	-0.72	0.17	-0.46	-0.17	-0.21	0.26	0.02	0.62	0.45	-0.14	0.65	0.65	-0.05	0.4	-0.3	-0.25	-1.35	-0.59
GENE6655X	IMAGE:298134	99836 FZD1 frizzled homolog 1 (Drosophila) Hs.94234 N70776	1	0.25	0.04	-1.07	-0.71	-0.12	0.07	-0.39	0.51	0.32	0.87	0.88	-0.29	-0.84	-0.08	-0.07		0.06	0.16	-0.47	0.23	-0.74	-0.64	-0.47	-0.22	-0.08	-0.63	-0.56	0.5	-0.63	-0.44	-0.01	0.11	-0.53	-0.49	0.22	0.04	0.4	-0.58	0.99	0.94	0.47	-0.23	-0.3	-1.25	-0.31	-1.18
GENE3794X	IMAGE:855658	220522 FZD1 frizzled homolog 1 (Drosophila) Hs.94234 AA664127	1	0.29	-0.09	-1.14	-0.15	-0.14	-0.07	-0.34	0.78	0.07	0.03	1.23	-0.28	-1.15	-0.01	-0.18		-0.03		-0.39	-0.19	-0.76	-1	-0.64	-0.27	-0.04	-0.49	-0.26	0.36	-1.01	-0.89	-0.09	-0.09	-0.71	-0.58	0.2	0.22	0.57	-0.32	0.93	0.92	0.3	-0.2	-0.22	-0.69	-0.73	-1.12
GENE5388X	IMAGE:488258	309218 COL16A1 collagen, type XVI, alpha 1 Hs.26208 AA088202	1	-0.05	0.38	-1.3	-0.2	-0.33	0.27	0.87	2.14	-0.05	1.33	-0.14	0.26	-1.16	-0.31	-2.41		-0.3	0.2	-0.97	0.51	-1.05	-0.73	-0.95	-0.84	-0.44	-1.35	-1.38	-0.66	-0.77	-0.75	-1.29		-0.73	-1.47	-0.05	-0.11	0.04	-0.5	-0.69	0.48	0.6	1.37	-0.09	-0.56	0.66	-1.35
GENE2901X	IMAGE:138139	116668 HMG14 high-mobility group (nonhistone chromosomal) protein 14 Hs.251064 R53888	1	0.1	0.15	-0.56	-0.63	-0.03	-1.09	-0.12	1.27	0.98		-0.27	-0.65	-0.29	-0.25	-1.07		0.76	0.11	-0.02	-0.16	-0.8	-0.68	0.39	-0.12	0.09	0.46	-0.68	-0.69	0.02	0.24	-0.7	-0.47	-0.41	-0.06	-0.32	0.78	0.91	-0.26	0.94	0.97	-1.06	-0.41	0.13	0.16	0.36	-0.85
GENE2677X	IMAGE:245970	115390 BST1 bone marrow stromal cell antigen 1 Hs.169998 N52293	1	-0.05	0.12	-0.39	-0.92	-0.13	-0.74	0.27	1.54	0.05	0.6	-1	-0.54	-0.25	-0.45	-1.11	-0.25		0.05	-0.62	-0.5	-0.45	-0.74	0.03	-0.08		-0.31	-0.74	-0.3	-0.49	-0.69		-0.31	-0.47	-0.96	0.24	0.57	0.13	-0.61	0.22	0.78	-0.71	-0.05	0.79	0.36	-0.7	-0.83
GENE6432X	IMAGE:381066	98506 SERPING1 serine (or cysteine) proteinase inhibitor, clade G (C1 inhibitor), member 1, (angioedema, hereditary) Hs.151242 AA057434	1	0.08	0.32	-0.31	-0.15	-0.77	-1.61	-0.61	0.32	0.44	1.02		-0.71	-1.26	-0.23	-0.42	1.5	0.59	0.67		-0.76	0.97	-0.65	-0.59	-0.65	-0.17	-1.37	-0.03	-0.61	-1.54	-1.07	0.45	0.16	-1.14	-0.44	0.36	0.22	0.21	0.13	0.56	0.19	-0.01	-1.19	-0.07	0.33	-0.19	-0.62
GENE2973X	IMAGE:756556	116990 SERPING1 serine (or cysteine) proteinase inhibitor, clade G (C1 inhibitor), member 1, (angioedema, hereditary) Hs.151242 AA481438	1	0.76	0.6	-0.1	-0.54	-0.24	-1.48	-0.33	-0.27	0.05	0.19	0.27	-1.61	-1.25	0.03	-0.45	1.31	0.31	-0.21	-1.34	-0.66	1.09	-0.93	0.03	-0.57	-0.14	-0.77	-0.24	-0.34	-1.34	-1.03	0.32	-0.17	-0.95	-0.54	-0.32	-0.36	0.75	0.29	0.33	0.59	0.12	-0.81	-0.23	-0.11	-0.83	-0.89
GENE5143X	IMAGE:1635203	307597 ESTs, Weakly similar to T28770 hypothetical protein W03D2.1 - Caenorhabditis elegans [C.elegans] Hs.127824 AI003775	1	0.53	-0.36	-1.98	0.1	-0.2	-0.48		-0.06	0.46	0.54	-0.67	-0.36	-0.81	-0.78	-1.05	0.03	-0.26	-0.78	0.37	-0.95	-0.47	-1.14	-0.28		0.12	-0.23	-1.65	-0.16	-1.51		-1.19	-1.23	-0.88	-1.54	-0.53	1.05	0.95	-0.2	-0.38	0.12	-0.34	-0.35	-0.08	0.14	-0.34	-1.22
GENE2469X	IMAGE:825369	114220 KIAA0121 KIAA0121 gene product Hs.155584 AA504515	1	-0.29	-0.19	-1.14	-0.16	-0.03	-0.5	0.95	0.34	0.44	0.25	-0.77	-0.08	0.2	0.53	-0.58	0.22	0.13	-0.81	0.58	-0.85	-0.45	-0.39	-0.59	-0.56	-0.26	-0.46	-0.83	0.31	-1.16	-0.6	-0.68	0.07	-0.93	-0.64	-0.13	0	0.14	-0.04	0.53	0.85	-0.01	-0.58	0.03	0.26	-0.64	-0.55
GENE6556X	IMAGE:526184	99209 RAB21 RAB21, member RAS oncogene family Hs.184627 AA076645	1	-0.02	-0.29	-1.32	-0.29	0.23	-0.5	1.12	0.63	0.75	0.56	-0.48	-0.06	0.19	0.36	-0.92	0.4	0.61	-1.07	0.16	-1.24	-0.68	-1.09	-0.72	-0.93	-0.31	-0.76	-1.28	0.05	-1.41	-0.53	-1.12	-0.21	-1.14	-0.99	-0.39	0.31	0.39	-0.56	0.25	1.09	-0.42	-0.6	0.23	0.17	-1.43	-0.92
GENE3219X	IMAGE:487513	118511 CTGF connective tissue growth factor Hs.75511 AA044993	1	-0.46	-0.54	-1.85	-0.03	0.09	-0.97	0.8	0.48	0.81	0.53		-0.02	0.36	0.47	-1.03	0.37	0.5	-1.01		-0.64	-0.83	-0.8	0.24	-0.02	0.27	0.34	-1.44	0.25	-1.11	-0.99	-1.53	-0.49	-1.27	-1.9	-0.58	-0.04	0.51	0.28	0.45	1.22	-0.02	-0.86	0.27	0.1	-1.2	-1.25
GENE1686X	IMAGE:526657	109699 TCEB3 transcription elongation factor B (SIII), polypeptide 3 (110kD, elongin A) Hs.155202 AA128607	1	-0.34	-0.62	-1.84	-0.31	-0.26	-0.82	0.45	0.44	0.77	0.21	-0.32	0.19	0.24	0.35	-1.14	0.18	0.41	-1.07	0.2	-0.63	-0.62	-0.35	0.06	-0.48	0.05	-0.62	-1.43	0.12	-0.93	-0.76	-1.63	-0.33		-1.81	-0.5	0.12	0.33	0.06	0.47	1.43	-0.36	-0.94	0.3	0.14	-1.1	-0.86
GENE1599X	IMAGE:898092	109224 CTGF connective tissue growth factor Hs.75511 AA598794	1	-0.45	-0.4	-1.65	-0.11	0.02	-0.85	0.05	0.29	0.64	0.38	-0.41	-0.49	0.01	0.24	-0.8	0.16	0.28	-1.1	-0.09	-0.6	-0.7	0.07	-0.18	-0.78	-0.25	-0.19	-1.84	0.22	-0.85	-0.78	-1.71	-0.43	-1.16	-1.61	-0.64	-0.21	0.43	0.01	0.34	1.45	-0.1	-0.82	0.17	-0.09	-1.28	-0.95
GENE3238X	IMAGE:701231	118639 CRHBP corticotropin releasing hormone binding protein Hs.115617 AA286752	1	-0.14	-0.21	-0.93	-0.02	0.35	-0.93	0.13	0.23	0.45	0.54	-0.22	-0.49	0.17	0.23	-0.93	0.2	0.29	-0.46	-0.25	-0.57	-0.43	-0.18	0	-0.27	0.38	0.05	-0.46	0.19	-0.66	-0.52	-0.81	-0.06	-0.78	-1.29	-0.57	-0.07	0.25	-0.08	0.22	0.95	-0.41	-0.51	-0.17	-0.05	-0.71	-0.78
GENE2223X	IMAGE:810632	112861 COL6A2 collagen, type VI, alpha 2 Hs.159263 AA464042	1	0.25	0.01	-1.18	-0.17	-0.19	-0.87	0.46	0.47	0.49	0.57	0.09	-0.33	0.08	0.25	-0.94	0.12	0.21	-0.12	-0.27	-0.46	-0.82	-0.15	0.52	-0.08	0.19	0.04	-0.53	0.27	-0.68	-0.69	-0.93	-0.34	-0.76	-1.42	-0.18	0.25	0.18	0.17	0.34	0.54	-0.15	-0.39	-0.14	-0.34	0.48	-0.78
GENE5219X	IMAGE:360254	308090 CYR61 cysteine-rich, angiogenic inducer, 61 Hs.8867 AA012892	1	-0.22	0.05	-0.9	-0.39	-0.92	-0.8	0.21	0.97	0.64	1.09	-0.14	0.03	0.38	0.5	-1.03	0.06	0.38	-0.88	-0.27	-0.38	-0.49	-0.69	0.22	-0.8	0.16	-0.29	-0.79	0.19	-0.78	-1	-1.94	-0.84	-0.93	-1.51	-0.16	0.47	0.93	0.32	0.3	1.05	0.14	-0.6	0.52	0.95	-0.78	-0.46
GENE5397X	IMAGE:1607286	309270 CYR61 cysteine-rich, angiogenic inducer, 61 Hs.8867 AI014487	1	-0.53	-0.06	-0.96	-0.68	-0.95	-0.48	1.15	0.96	0.5	0.85	-0.1	-0.04	0.42	0.39	-1.13	0.01	0.33	-0.95	-0.03	-0.42	-0.7	-0.77	0.65		-0.05	0.14	-1.12	-0.05	-0.79	-0.89	-1.68	-0.94	-0.83	-1.39	-0.11	0.69	0.78	1.04	0.24	1.47	-0.14	-0.8	0.6	1.03	-0.74	-1
GENE5595X	IMAGE:1607473	310562 ESTs Hs.131789 AI014470	1	-0.26	-0.08	-0.55	-0.18	-0.82	-0.31	0.83	0.76	0.57	0.49	-0.2	0.02	0.44	0.54	-0.91	0	0.12	-0.99	-0.07	-0.13	-0.71	-0.4	0.54	-0.33	-0.04	-0.19	-0.89	-0.14	-0.71	-0.76	-1.33	-0.97	-0.91	-1.25	0.03	0.18	0.61	0.68	0.29	1.2	0.2	-0.66	0.46	0.64	-0.71	-0.58
GENE5634X	IMAGE:53245	310856 Homo sapiens, clone IMAGE:3867243, mRNA Hs.286014 R15978	1	-0.49	0.07	-0.09	-0.89	-0.67	-0.2	0.8	0.71	0.89	0.9	1.01	-0.03		0.09	-0.98	-0.41	0.43	-0.76	0.05	-0.55	-0.47		0.53	0.03	0.03	0.44	-0.94	0.24	-0.24	0.01	-0.53	-0.3	-0.04	-0.73	-0.22	0.39	0.32	0.7	-0.15	0.81	-0.23	0.07	0.34	0.54	-0.85	-0.19
GENE6329X	IMAGE:1948377	319946 EST, Highly similar to JC5266 sigma receptor 1 [H.sapiens] Hs.157285 AI365014	1	0.29	0.65	-0.43	-0.63	-0.38	-0.1	1.01		0.81	1.26	0.82	0.66	0.07	-0.39	-0.5	0.38	0.38	-0.25	-0.63	0.33	0.17	0.11	0	-0.39	0.12	-0.68	-0.25	0.43	0.61	0.79	-1.33	-0.12	-0.57	0.44	0.33	-0.1	0.72	0.04	-0.23	1.49	0.87	-0.28	0.7	0.79	-0.54	-0.27
GENE6677X	IMAGE:897531	99937 MCAM **melanoma cell adhesion molecule Hs.211579 AA489587	1	-0.16	0.09	-0.85	-0.62	-0.74	-0.13	0.68	0.92	0.92	1.04	1.03	1.18	0.13	0.39	-0.91	0.64	0.46	0.04	-0.2	-0.05	0.67	0.61	0.75	-0.1	0.87	0.21	-0.01	1.17	0.02	0.92	-0.2	0.44	-0.5	-0.1	0.8	1.8	1.04	0.54	0.17	0.78	1.53	-1.17	0.51	0.75	0.18	-0.88
GENE2687X	IMAGE:233277	115461 ESTs Hs.270149 H77493	1					0.05	-0.31	0.28	0.02	0.65		0.27		0	0.21	-0.66		-0.22			-0.62	-0.26	0.92		0.3	0.08	0.06	-0.29		-0.14	0.42	-0.76	0.16	-0.38	0.51	0.78	0.71	1.12	0.34	0.47	1.31	0.3	-0.82		0.86	0.47	-0.37
GENE3060X	IMAGE:489755	117509 ADAM12 **a disintegrin and metalloproteinase domain 12 (meltrin alpha) Hs.8850 AA099554	1	-0.22	-0.15		-0.33	0.94		-0.07	-0.41	0			-0.71	0.17	-0.35	-2.06	-0.28	-0.72	0.43	-1.2	-0.52	-0.99	0.53		0.27	0.81	0.22	0.17	0.8	0.07	0.22	-0.12		-0.13	-0.36	0.69	1.38	0.9	0.71	1.26	1.55	0.25	-0.98	-0.14	0.73	0.67	0.13
GENE649X	IMAGE:233688	103637 ADAM12 a disintegrin and metalloproteinase domain 12 (meltrin alpha) Hs.8850 H78537	1		-0.08		0.38	0.42	0.16	-0.03	-0.78	-0.75	0.3		0.89	0.46	-0.48	-1.74	0.2	-1.16	-0.01		-0.85	-0.35	1.33		0.65		0.08	0.62	0.72	0.37	0.19	-0.97	0.7	-0.53	-0.83	0.41	1.21	1	0.64	1.64	1.48	0.3	-1.72	-0.4	1.06	1.18	-0.22
GENE4855X	IMAGE:448046	226520 Homo sapiens cDNA FLJ31066 fis, clone HSYRA2001153 Hs.352537 AA702808	1	0.23	0.08	0.08		1.17	-1.37	0.59					-0.01	0.56	0.12	-1.61		-0.28	1.26		-0.61	-0.46	0.64	1.16	0.28	1.6	0.85	0.67	1.35	0.42	0.28	-0.63	0.64	-0.15	-1.77	0.52	1.68	1.68	1.3	1.58	2.54	0.29	-1.25	-0.16	1.52	1.1	-0.49
GENE1492X	IMAGE:627039	108628 ADAM12 **a disintegrin and metalloproteinase domain 12 (meltrin alpha) Hs.8850 AA190508	1	0.51	-0.02	0.04	-0.17	0.78	0.13	0.26		0.25	0.59		0.19	0.48	0.27	-1.15	0.15	0.21	-0.28		-0.06	-0.84	0	0.08	0.08	1.15	0.36	0.21	-0.15	0.24	0.01	-0.87	0.17	-0.15	-1.06	-0.1	1.26	0.9	0.59	1.1	1.55	0	-0.76	-0.39		0.5	-0.14
GENE3984X	IMAGE:269425	221714 N26171	1	-0.17	0.36	-0.5	-0.16	0.23	-0.22	0.4	-1.04		0.46		-0.43	0.17	0.44	-0.6	-0.44	-0.37	-0.41		-0.84	-0.3	0.69	0.16	0.1	0.84	-0.03	0	1.16	0.05	0.14	-0.04	0.46	-0.28	-0.32	0.47	0.39	0.45	-0.22		0.84	0.97	-0.37	0.06	0.16	-0.15	1.16
GENE5336X	IMAGE:1561038	308863 KIAA1237 KIAA1237 protein Hs.10491 AA977469	1	0.74	0.53	0.73	-0.69	-1.19	-1.23	-0.29	-1.96	-0.56	-0.79		0.85	0.35	-0.3	0.01		-0.31	-1.32	-0.25	0.71	0.47	0.24	0.77	0.48	0.52	0.19	0.33	0.44	0.43	-0.2	-0.06	-0.27	-0.66	-0.73	0.05			0.07	0.01	0.19	0.54	-0.02	0.21	0.41	0.88
GENE2523X	IMAGE:42008	114538 KIAA1091 KIAA1091 protein Hs.26797 R60710	1	0.34	0.22	-0.5	-0.61	-0.38	0.04	0.05	0.41	-0.7	1.01	0.9	1.41	0.26	0.11	-0.6	0.42	0.14	-0.44	0.13	0.55	0.71	0.08	0.41	0.01	0.66	-0.34	-0.22	-0.02	-0.26	-0.09	-0.66		-0.09	-1.15	0.23	0.89	0.29	0.66	0.19	0.87	0.51	-0.68	0.54	0.85	1.15	-1.28
GENE1930X	IMAGE:487429	111105 COL6A1 collagen, type VI, alpha 1 Hs.108885 AA046525	1	1.34	1.14	0.32	-0.49	-0.81	0.51	0.81	-1.9		-0.59	0.61	0.63	-0.36	-0.19	-1.62	0.07	-1.21	-1.42	-0.4	0.99	0.68	1.01	0.59	0.54	1.07	-0.49	-0.59	0.46	-0.92	-0.44		0.59	-0.22	-0.45	0.98	1.01	1.3	-0.01	0.86	0.64	0.68	-0.25	-0.18	-0.09	2.55	-1.16
GENE3371X	IMAGE:796777	119436 D2S448 **Melanoma associated gene Hs.118893 AA461166	1	0.69			-1.27	-0.93	-0.03	0.65	-0.86	-0.02	0.38		0.49	-0.13	0.83	-0.48	-1.24	0.17			1.04	0.46	0.74	-0.01	0.38	0.17	-0.47	-0.48	0.42	-0.55	0.29	0.47	0.17	-0.42	-0.89	0.42	1.29	0.17	-0.23	0.37	1.01	0.64	0.3	-0.22	0.37	-0.62	-1.02
GENE5990X	IMAGE:1902764	315265 PFKFB3 6-phosphofructo-2-kinase/fructose-2,6-biphosphatase 3 Hs.195471 AI301004	1	-0.02	0.27	-0.7	-0.53	-0.21	-1.31	-0.79	-0.57	0.39	1.55	0.12	0.8	0.17	0.28	0.26	0.7	0.87	0.64	0.72	1.11	0.7	-0.06	0.18	-0.63	0.55	0.19	0.62	-0.13	-0.97	-0.45	0.72	0.22	-0.86	-0.19	0.56	0.59	0.49	-0.21	0.43	1.01	0.37	-0.85	-0.38	0.39	0.66	-1.07
GENE2181X	IMAGE:278375	112594 PFKFB3 6-phosphofructo-2-kinase/fructose-2,6-biphosphatase 3 Hs.195471 N64010	1	0.2	0.35		-0.7	-0.08	-1.56	-0.98	0.59	0.91			0.09	0	0.14	0.4	2.32	0.98	0.97		0.53	0.16	-0.67	-0.16	-0.76	0.36	-0.34	0.47	-0.11	-1.07	-0.47	0.21	0.64	-0.81	-0.31	0.79	0.16	0.07	-0.2	0.15	0.49	-0.06	-0.68	-0.24	0.75	0.45	-0.66
GENE3650X	IMAGE:469297	161486 BHLHB2 basic helix-loop-helix domain containing, class B, 2 Hs.171825 AA026120	1	0.64	0.5		-0.16	-0.4	-0.52	0.07	-0.18	0.7	0.44	-0.65	0.37	-0.31	0.87	-0.47	0.87	1.28	0.24	0.19	-0.11	0.04	-0.24	-0.63	-0.47	0.69	0.43		-0.71	-1.21	-0.93	-0.16	-0.19	0.48	-0.37	1.06	1.16	-0.09	-0.51	1.49	1.08	-0.24	-0.06	0.45	0.51	-0.05	-0.77
GENE4567X	IMAGE:866488	225008 ESTs, Weakly similar to 2004399A chromosomal protein [H.sapiens] Hs.14434 AA679503	1	0.88	0.6	-0.38	-0.22	-0.26	-0.67	0.12	-0.24	1.04	0.85	-0.24	0.36	-0.05	1.03	-0.24	0.75	1.24	0.46	0.55	-0.08	0.07	-0.32	-0.56	-0.74	0.57	0.77	-0.07	-0.09	-1.07	-0.9	-0.11	-0.26	0.62	-0.36	0.93	1.22	0.14	-0.55	0.99	1.21	0.08	-0.13	0.37	0.54	0.43	-0.78
GENE1309X	IMAGE:810017	107648 PLAUR plasminogen activator, urokinase receptor Hs.179657 AA454879	1	0.61	0	-1.25	0.17	0.32	-1.01	0.33	0.35	1.16	1.26	-0.69	-0.35	-0.19	0.26	-1.38	1.91	1.09	0.8	-0.42	0.39	0.75	-0.36			0.12		0.76	-0.04	-0.53	0.08	0.86	0.62	-0.04	-0.43	0.71	1.19	0.6	0.46	0.65	0.88	0.61	0.16	0.43	0.17	-0.47	-0.73
GENE1548X	IMAGE:590154	108945 PLAUR plasminogen activator, urokinase receptor Hs.179657 AA147962	1	0.93	0.52	-0.94	-0.38	0.5	-1.2	-0.31	0.06	1.39	1.75		-0.71	-0.44	0.28	-1.46	2.09	1.56	0.88		0.71	1.02	-0.83	1.05	-0.15	0.44	0.27	0.6	-0.16	-0.43	0.36	0.93	0.24	0.11	-0.59	0.47	0.71	0.69	0.38	0.89	0.84	0.7	0.1	0.63	-0.27	-0.98	-0.58
GENE5658X	IMAGE:1574438	311037 MMP11 matrix metalloproteinase 11 (stromelysin 3) Hs.155324 AA954935	1	1.03	-0.43	-2.45	1.03	0.55	0.13	0.77	0.23		1.57	0.28	-0.92	-1.18	0.01	-1.95	0.57	1.43	1.07	-0.16	-0.44	-1.46		0.62	1.27	1.11	0.56	-0.15	0.74	-0.9	0.62	0.91	0.2	-0.27	-0.52	1.26	1.92	0.85	0.06	2.22	2.64	2.69	0.87	1.48	0.17	-1.31	-0.71
GENE4258X	IMAGE:462192	223248 ESTs Hs.120852 AA705436	1	0.67	-0.13	-0.99	-0.3	0.21	-0.69	-0.31	0.2	-0.28	1.15	-0.74	0.27	-0.26	0.4	-0.22	-0.84	-0.47	0.35	-0.1	0.06	0.41	0.26	-0.16	-0.27	0.01	0.29	0.81	-0.14	-0.16	-0.07	-0.34	-0.88	-0.07	-0.56	0.25	0.8	0.28	-0.26	0.85	1.52	0.28	-0.36	-0.26	-0.21	0.69	-0.68
GENE4679X	IMAGE:462412	225715 AA699878	1	0.99		-1.72	0.31	0.33	-0.73	-0.02	1.05	0.23	1.67	-0.68	0.25	-0.7	0.47	-0.48	-0.71	-0.29	0.05	0.74	-0.67	-0.02	0.37	-0.64	-0.36	-0.43	0.2	0.92	-0.38	-0.8	-0.18	-0.98	-0.72	0.36	-0.83	0.41	0.94	-0.03	-0.92	1.22	1.6	0.28	-0.84	-0.62	-0.17	0.53	-1.44
GENE1293X	IMAGE:842846	107547 TIMP2 tissue inhibitor of metalloproteinase 2 Hs.325495 AA486280	1	0.57	-0.02	0.1	-1.17	-0.77	-0.65	0.1	0.75	0.48	1.03	1.01	0.29	0.13	-0.02	-0.43	0.18	0.86	-0.68	0.41	0.16	0.55	-0.82	-0.17	-0.36	0.12	-0.24	-0.49	0.36	-0.63	-0.4	-0.23	0.01	-0.41	-0.8	0.48	0.76	0.95	-0.27	0.15	0.81	0.64	0.2	0.61	-0.13	-0.26	-1.32
GENE3474X	IMAGE:241432	120018 P311 P311 protein Hs.142827 H80684	1	-0.17	-0.06	-0.83	-0.48	-0.14	0.7	0.26	0.81	-0.06	0.84	0.63	-0.1	-0.45	-0.54	-1.25	-0.8	0.2	0.13	-0.29	0.16	-0.44	0.32	0.16	0.13	0.03	-0.64	-0.45	0.08	-0.56	-0.25	-0.35	-0.78	-0.2	-1.18	-0.14	1.2	0.2	-0.11	0.01	1.36	1.23	-0.34	0.06	-0.82	0.45	0.29
GENE1698X	IMAGE:324307	109786 BCMP1 brain cell membrane protein 1 Hs.8769 W47640	1	-0.32	0.19	-1.39	-0.06	0.05	-0.14	0.93		-0.11	0.4		-0.47	-0.67	-0.12			-0.49	-0.35	0.49	-1.14	2.43	-0.49	-0.6	-0.19		-1.23	-1	-0.43	-0.93	-0.65	-0.91	-0.45	-0.76	-0.4	0.14	1.12	-0.22	-0.77		1.09	0.57	0.1	0.93	0.34	-1.34	-0.8
GENE4761X	IMAGE:309447	226068 BCMP1 brain cell membrane protein 1 Hs.8769 N94344	1	-0.32	0.21	-0.3	0.36	-0.29	-0.43	0.13	-0.45				-0.63	-0.34	0.18	-0.53		-0.21		0.23	-0.94	2.16	-0.32	-0.25	0.02	-0.08	-0.86	-0.87	-0.35	-0.84	-0.65		-0.75	-0.88	-0.77	-0.4	0.97	-0.11	-0.33	-0.2	0.53	0.48	-0.08	0.48	-0.23	-0.46	-0.57
GENE3020X	IMAGE:344595	117232 ESTs, Weakly similar to K1CJ_HUMAN KERATIN, TYPE I CYTOSKELETAL 10 [H.sapiens] Hs.55412 W73634	1	0.3	0.23	-0.66	-0.22	0.33	-0.48	0.04	0.35	-0.32	0.2	-0.63	0.33	-0.37	-0.15	-0.73	-0.35	-0.07		-0.92	-0.37	0.81	-0.34	-0.34	-0.07	0.11	0.05	-0.36	0.33	-0.74	-1.21	-0.52	0.27	-0.83	-0.49	0.38	0.04	-0.32	0.23	0.46	0.51	1.22	0.08	0.46	-0.39	-0.86	-1.44
GENE660X	IMAGE:324690	103712 CKTSF1B1 cysteine knot superfamily 1, BMP antagonist 1 Hs.40098 W47324	1	0.34	0.79	-1.63	0.6	-0.39	-0.53	0.43	1.32	0.71	1.89	0.45	-0.13	-0.24	-0.15	-2.6	0.47	-0.14	-0.33	0.32	-0.87	0.81	-0.3	0.11	0.55	0.9	0	-0.2	1.19	-1.49	-2.26	-1.48	0.01	-1.09	-0.15	0.72	0.24	-0.18	0.36	0.81	0.84	1.41	-0.1	1.18	-0.38	-2.03	-2.61
GENE3742X	IMAGE:324513	220208 CKTSF1B1 cysteine knot superfamily 1, BMP antagonist 1 Hs.40098 W51909	1	-0.03	0.2	-1.76	0.14	-0.47	-0.51	0.45	0.8	1.43	2.08	0.49	-0.85	-0.91	-0.79	-2.05	0.7	-0.61	-0.24	0.69	-0.95	0.51	-0.5	-0.65	-0.52	-0.04	-1.35	-1.08	-0.04	-1.06	-1.02	-0.26	0.54	-1.01	0.09	0.27	1.05	-0.75	-0.38	0.58	1.34	2.37	-0.53	1.08	-0.97	-2.21	-1.85
GENE1792X	IMAGE:324951	110318 CKTSF1B1 cysteine knot superfamily 1, BMP antagonist 1 Hs.40098 W48619	1	0.28	0.53	-1.67	0.52	0.83	-0.31	0.88	1.71	0.85	2.05	-0.46	-0.81	-1.16	-0.72	-2.34	1	-0.52	-0.21	0.22	0.31	1.56	-0.62	-1	-1.23	-0.37	-0.2	-0.85	0.36	-1.52	-1.71	-0.12	1.05	-0.83	0.1	1.15	1.02	-1.14	-0.76	0.62	1.89	2.44	1.01	1.58	-0.3	-1.97	-2.56
GENE1070X	IMAGE:291657	106206 GCSH glycine cleavage system protein H (aminomethyl carrier) Hs.77631 N73461	1	0.08	0.25	-0.71	-0.21	0.25	-0.31	0.39	0.46	0.95	1.71	0.41	-0.36	-0.64	-0.08	-0.98	0.44	0.11	-0.16	-0.59	-0.35	0.61	-0.46	-0.14	-0.26	0.04	-0.74	-0.65	0.21	-1.3	-0.55		-0.33	-0.89	-0.32	0.38	0.23	-0.29	-0.17	0.51	0.74	1.31	0.05	0.7	-0.49	-1.07	-0.74
GENE5585X	IMAGE:1665349	310491 CKTSF1B1 cysteine knot superfamily 1, BMP antagonist 1 Hs.40098 AI041650	1	0.12	1.07		0.03	-0.65	0.08	1.27	0.15	0.97	0.15	-1.12	-2.17	-1.01	-0.55			-0.55			-0.5	0.48	-0.58	-0.44	-0.24	-0.5	-0.87	-0.65	-0.13	-1.19	-1.54	0.69	1.02	-0.62	0.92	1.95	0.91	-0.94	-0.28	1.18	0.63	2.39	0.35	2.24	0.29	-2.36	-1.88
GENE4009X	IMAGE:306743	221875 TSG twisted gastrulation Hs.247302 N91767	1		-0.04	-0.85	0.15	0.01	-0.07	0.27	0.25	-0.21	1.69	0.78	-0.16	-0.15	0.18	0.49	-0.03	0.33	1.37	0.16	-0.42	-0.35	-0.24	-0.19	-0.28	0.57	0.37	0.27	0.34	-0.31	-1.12	0.16	0.35	-0.24	0.94	0.76	0.33	0.49	0.81	0.48	0.8	0.41		0.36	-0.15	-0.64	-0.79
GENE6616X	IMAGE:842760	99556 TSG twisted gastrulation Hs.247302 AA486182	1	0.74	0.19	-0.41	-0.22	-0.6	0.4	0.54	-0.2	0.06	1.24	1.05	0.62	-0.28	0.61	0.9	0.52	0.44	1.29	-0.2	0.92	0.5	0.2	0.15	-0.13	0.4	0.31	-0.23	0.63	-0.04	-0.78	0.8	1.23	-0.14	1.47	1.05	0.39	0.52	0.49	0.52	1.12	0.88	-0.6	0.7	0.12	-0.6	-1.13
GENE2743X	IMAGE:469969	115787 ITGAV integrin, alpha V (vitronectin receptor, alpha polypeptide, antigen CD51) Hs.295726 AA029934	1	-0.74	0.35	-0.28	0.32	0.44	-0.53	1.09	-0.14	-0.42	1.21	0.48	0.08	-0.45	-0.08	0.24	0.22	-0.28	1.07	0.31	-0.73	0.09	0.23	0.05	-0.37	0.24	-0.16	-0.48	0.38	-0.82	-0.86	-0.13	0.65	-0.54	0.63	0.87	0.97	0.38	0.13	0.23	0.94	0.4	0.24	0.43	0.52	0.17	-1.64
GENE3850X	IMAGE:824193	220884 Homo sapiens mRNA full length insert cDNA clone EUROIMAGE 994846 Hs.28005 AA490959	1	-0.48	0.53	-0.47	-0.27	0.41	0.23	-0.55		0.97	0.91	0.57	0.18	0.5	0.78	0.47	0.5			-0.41	0.18	0.5	0.2		-0.36	-0.11	0.51	-0.07	0.07	-0.5	-0.55	-0.15	0.05	0.45	-0.07	0.55	0.18	0.12	0.42	0.32	0.58	0.91	-0.53	0.14	0.21	0.2	-0.62
GENE1555X	IMAGE:898044	108967 Homo sapiens cDNA FLJ14755 fis, clone NT2RP3003145, moderately similar to Mus musculus metallocarboxypeptidase CPX-1 mRNA Hs.177536 AA598945	1	0.15	1.36		0.37	0.92	-0.28	0.57		-0.52	0.6	-0.06	-0.5	0.01	0.07			0.17	-0.44	-0.84	-0.54	-0.35	-0.88	-0.18		0.03	-0.53	-0.73	0.1	-0.61	-0.52	-0.97	0.09	-0.92	-1.18	0.64	0.25	-0.06	0.47	0.24	0.97	-0.61	0.04	-0.39	-0.11	0.06	-0.61
GENE264X	IMAGE:365515	101547 FGF7 fibroblast growth factor 7 (keratinocyte growth factor) Hs.164568 AA009608	1	-0.09	0.72	-0.28	0.74	0.71	-1	0.6	0.58	-0.38	1.36	0.23	0.13	-0.44	-0.95	-0.75	-0.63	-0.71	-0.87	-0.36	-0.13	0.72	-1.05	-0.31	-0.74	0.23	-0.45	-1.15	-0.29	-0.91	-1.39	-1.45	-0.59	-0.81	-0.43	-0.22		0.41	-0.67	0.24	0.21	0.42	0.64	0.35	0.23	-0.95	-1.4
GENE902X	IMAGE:812294	105221 ESTs Hs.22247 AA455087	1	-0.22	0.25	-0.44	0.61	0.36	-0.74	0.59	-0.16	-0.48	0.38	-0.84	-0.66	-1.46	-0.93	-0.93		0.11	0.74	-0.81	-1.18	-0.16	-0.27		-0.8	-0.57	-1.32	-1.06	0.03	-0.51	-0.77	-0.78	-0.53	-0.74	-0.92	0.51	0.91		-0.8	0.33	0.7	0.14	0.29	-0.11	-0.57	-1.47	-0.68
GENE4862X	IMAGE:51011	226583 GUCY1A3 guanylate cyclase 1, soluble, alpha 3 Hs.75295 H19241	1	-0.14		-0.58	0.49	0.64	-0.94	0.81	-1.53	-0.5		-0.22	-0.4	-1.38	-1.14			-0.11		-0.6	-1.29	-0.79	-0.68	-0.12	-0.56	-0.32	-1.19	-1.28	0.4	-0.42		-0.67	-0.78	-0.52	-0.86	0.18	0.77	0.1	-0.47		0.83	-0.33	0.33	0.54	-0.34	-1.44	-1.14
GENE1056X	IMAGE:51749	106115 GUCY1A3 guanylate cyclase 1, soluble, alpha 3 Hs.75295 H23049	1	0.16	0.35	-0.3	0.45	0.06	-0.65	0.78	-1.69	-0.61	-0.24	-0.97	-0.91	-1.27	-0.25	-1.2	-0.51	-0.45		-0.83	-0.85	-0.54	-0.24		-0.26	-0.25	-0.55		-0.12	-1.25	-0.88	-0.1	-0.05	-0.37	-0.37	0.39	0.81	-0.06	-0.62	0.87	0.39	0.57	0.4	0.98	-0.73	-1.42	-1.12
GENE2806X	IMAGE:160485	116154 GUCY1A3 guanylate cyclase 1, soluble, alpha 3 Hs.75295 H22135	1	0.2	0.3	-0.42	0.22	0.7	-0.89	1.02	0.04	-0.41	-0.14	-0.15	-0.46	-2.15	-1.47	-1.13	-0.7	-0.06	-0.71	-0.9	-0.32	-0.12	-0.47			-0.39	-1.16		-0.04	-0.55	-1.32	0.02	-0.17	-0.32	-0.1	0.76	1.21		-1.25	0.45	1.44	0.84	0.24	0.42	-0.53		-1.16
GENE130X	IMAGE:300323	100732 ECM2 extracellular matrix protein 2, female organ and adipocyte specific Hs.35094 N79778	1	-0.21		0.14	0.72	0.32	-0.11	0.59	-0.34	-0.71	0.25		-0.28	-1.37	-0.88	-0.34	-0.84	0	-0.32	-1.47	-0.65	-0.3	-0.37		-0.98	-0.61		-1.16	-0.35	-0.05	-0.55	-0.75	0.18	-0.81	-0.52	0.47	0.58	0.32	-0.25	0.8	1.09	0.73	0.21	-0.19	-0.08	-0.66	-0.9
GENE375X	IMAGE:53081	102206 ESTs Hs.99472 R16259	1	-0.04	-0.83		0.23	0.43	-1.33	0.92	0.37	-1.4	-0.09		-0.54	-1.26	-0.62	-0.47	-0.77	-0.06	-0.56		-1.03	-0.4	-0.34			-0.69	0.2			-1.03	-1.2	-0.24	-0.47	-0.81	-0.49	-0.28	0.04	2.57	-0.92	0.77	1.25	1.44	0.73	-0.59	-1.47		-2.08
GENE5X	IMAGE:809406	100034 ESTs Hs.99472 AA459894	1	-0.01	-0.36	-1.56	0.84	0.09	-1.22	0.22	-1.05	-0.07	0.97	-1.17	-0.69	-0.81	0.24	-0.09	-0.88	-0.15	0.18	-1.12	-0.88	-1.1	-0.97		-0.53	0.03	-0.32	-0.69	-0.57	-0.74	-0.96	-0.22	-0.08	-0.25	-0.22	0.04	-0.21	0.22	-0.97	1.24	0.92	1.43	0.06	-0.52	-0.28	-0.71
GENE6430X	IMAGE:812277	98497 TEM7R tumor endothelial marker 7-related precursor Hs.33033 AA455078	1		-0.15	-0.91	0.55	-0.16	-0.85	-0.15		0.07	1.43	-0.8	-0.74	-0.04	0.21	0.16	0.65	0.31		-0.52	-0.29	-0.38	-0.72	-0.72	-0.48	-0.77	-0.53	-0.56	0.04	-0.4	-0.5	0.05	-0.02	-0.31	-0.2	0.3	-0.38	-0.01	-0.36	0.88	0.62	0.79	-0.25	0.03	-0.36	0.04	-0.18
GENE4242X	IMAGE:506143	223115 SCHIP1 schwannomin interacting protein 1 Hs.61490 AA708955	1	-0.01	0.06	-0.77	1.1	0.33	-0.59	0.13	-0.53	0.23	0.62	-0.34	0.88	-0.24	0.39	-0.03	-0.52	-0.09		0.16	0.49	0.54	0.1	0.12	-0.18	0.23	-0.31	-0.2	0.23	-0.46	-0.51	-0.93	-0.55	-0.67	-1.03	0.19	0.3	0.98	0.24	-0.15	0.8	0.49	-0.13	0.27	-0.05	0.2	-1.37
GENE703X	IMAGE:626001	103978 TAZ transcriptional co-activator with PDZ-binding motif (TAZ) Hs.24341 AA187933	1	0	0.03	-0.66	-0.5	-0.01	-0.37	-0.85	0.41	-0.23	0.34	0.18	0.08	-0.4	-0.17	-0.5	-1.34	0.5	2.18	-0.08	-0.7	0.11	0.36	-0.05	0.09	-0.08	-0.94	0.72		-0.62	-0.8	-1.84	0.46	-0.84	-1.05	-0.22	0.97	1.51	0.58	-0.41	0.54	0.38	-0.51	0.07	-0.1	-0.03	-1.03
GENE684X	IMAGE:823811	103875 PRO2714 hypothetical protein PRO2714 Hs.63382 AA490279	1	0	0.67	-0.28	-0.68	-0.14	-0.91	-0.31	0.57	-0.03	0.08	-0.76	-0.01	-0.03	0.31	-0.21		0.36	0.35	-0.54	-0.46	0.47	0.36	-0.01	-0.28	0.01	0.6	-0.21	-0.29	-0.28	-0.47	-0.77	0	-1.14	0.92	0.16		1.35	-0.08	0.26	0.92	0.32	-0.09	0.26	0.35	-1.36	-1.37
GENE4352X	IMAGE:502536	223803 NRP2 neuropilin 2 Hs.17778 AA126383	1	0.33	0.17	-0.61	-0.87	0	-0.73	-0.14	0.12	-0.22	0.69	0.68	-0.66	-0.05	0.34	-0.23	-0.86	-0.06	0.4	-1.02	-0.36	0.37	0.47	0.19	-0.04	-0.09	0.41	-0.27	-0.28	-0.34	-0.56	-0.86	0.04	-0.96	0.46	0.36	0.94	2.28	0	0.67	0.74	0.13	-0.19	0.15	0.48	-1.17
GENE2002X	IMAGE:840770	111652 MSTP031 MSTP031 protein Hs.105689 AA486081	1	-0.17		-0.75		0	-0.59	0.27	1.07	-0.57	-0.32	-0.47	-0.59	-1.15	-0.35	-0.85	-0.85	-0.39		-0.55	-0.27	-0.39	-0.64		-1.08	-1.03	-0.67	-1.21		-1.16	-0.95	-0.26	-1.34	-0.18	-0.67	-0.67	0.2	0.5	-0.74	0.27	-0.18	0.52	0.7	0.06	-0.32	-0.46	-0.19
GENE6687X	IMAGE:325355	99996 LTBP2 latent transforming growth factor beta binding protein 2 Hs.83337 W52204	1	0.4	-0.27	-0.24	0.08	0.11	-0.71	0.14	1.7	0.85	0.59		-0.6	-0.8	-0.16	-0.87	-0.45	0.25	1.14		-0.25	-0.46	-0.58	-0.92	-1.16	-0.62	-0.69	-0.74	-0.43	-1.29	-1.15	-0.03	-0.73	-0.52	-0.68	-0.51	-0.43	0.21	-0.95	0.26	-0.33	0.93	0.11	0.25	-0.05	-0.59	-0.35
GENE6541X	IMAGE:767202	99161 LTBP2 latent transforming growth factor beta binding protein 2 Hs.83337 AA424584	1	-0.18	-0.62	-0.95	0.48	-0.27	-0.53	0.46	1.5	-0.82		-0.1	-0.6	-0.66	-0.55	-1.2	-0.19	-0.11	1.33	-0.31	-0.67	-0.7	-0.42	-0.58	-0.77	-0.61	-0.5	-0.69	-0.78	-0.64	-1.04	0.2	-0.71	0.11		-0.31	0.23	-0.12	-0.67	0.04	0.26	0.89	0.09	0.57	0.66	-0.44	-0.18
GENE3538X	IMAGE:236333	120448 ISLR immunoglobulin superfamily containing leucine-rich repeat Hs.102171 H61361	1	1.21	-0.03	-1.41	0.6	0.04	-1.12	0.14	2.34	0.34	1.61		-1.26	-1.26	-0.69	-1.85	0.32	0.27	0.98	-1.13	-0.55	-1.45	0.14		-0.88	-0.93	-0.63	-0.68	-0.91	-1.45	-1.59	-0.33	-0.09	-0.67	0.28	0.5	0.64	-0.26	-0.77	0.79	1.15	1.52	-0.15	0.41	-0.5	-1.13	-1.06
GENE738X	IMAGE:244703	104192 N52533	1	-0.29	-0.14	-0.63	0.88	-0.76	-0.7	-0.17	1.85	0.49	0.67	-0.4	0.06	-0.77	0.39	-1.05	-0.89	0.17	0.38	-0.66	-0.9	-0.74	-0.22	0.17	-0.26	-0.36	-0.05		-0.31	-0.44	-0.8	-0.78	-0.38	-0.43	-0.1	0.17	-0.01	0.64	-0.45	-0.14	-0.12	0.68	-0.42	0.61	-0.23	-0.36	-0.35
GENE1370X	IMAGE:1126750	107953 ESTs Hs.116603 AA665536	1	-0.28	0.06	-0.37	-0.27	-0.34	-0.88	-0.42	1.44	0.61		0.34	-0.24	0.13	0.38	-0.59	0.2	0.22	0.46	-0.38	-0.13	-0.78	-0.06	0.54	0.27	0.18	0.21	-0.37	-0.06	-0.49	-0.27	-0.41	-0.25	-0.72	-0.65		0.44	0.39	-0.53	0.2	0.39	0.27	-0.06	0.37	0.32	0.28	0.06
GENE1276X	IMAGE:81475	107459 T63511	1	-0.37	-0.16	-0.46	-0.47	-0.06	-0.77	-0.56	1.85	0.3		0.51	-0.4	0.01	-0.11	-0.52	-0.33	0.15	1.26	0.53	-0.42	-0.41	-0.45	0.54	-0.1	0.19	0.04	-0.11	0.02	-0.26	-0.29	-0.81	0.2	-0.17	0.61	-0.16	0.13	0.25	0.02	-0.27	0.38	0.07	-0.06	-0.06	-0.05	-0.77
GENE3760X	IMAGE:823655	220332 AD036 AD036 protein Hs.21941 AA490585	1	-0.03	0.57	-1.41		0.56	-0.46	0.01	0.41	0.41	0.95	0.52	-0.97	-0.8	0.1	-0.48		-0.5	-0.26	-0.54	-0.99	-0.4	-0.53	-0.19	-0.32	-0.38	-0.87	-0.94	-0.1	-0.58	-0.81	-0.64	-0.29	-0.94	-0.97	0.2	-0.03	0.94	0.04	0.15	1.78	1.03	0.28	0.91	0.74	-1.07	-0.15
GENE1030X	IMAGE:78921	105958 ASPN asporin (LRR class 1) Hs.10760 T60482	1	0.12	1.44		1.79	0.26	-1.03	0.77	-0.13	1	1.35	-0.94	-1.05	-1	-0.12	-0.61	1.13	0.62		-0.68	-1.26	-1.72	-0.24	-0.18	0.13	-0.31	0.28	-0.46	-0.22	-1.54	-1.27	-0.58	1.85	-1.13	0.66	1.1	1.27	-0.7	1.2	2.36	2.45	2.28	0	-0.31	-0.45	-0.82	-1.27
GENE3766X	IMAGE:502791	220379 ZAK sterile-alpha motif and leucine zipper containing kinase AZK Hs.115175 AA126914	1	-0.21	0.17	-1.19	-0.48	0.45	-0.36	-0.12	0.27	0.94	0.21	1.46	0.59	-1.01	-0.15	0.94	0.34	-0.27	-0.47	-0.1	-1	-0.32	0.34	0.12	-0.14	0.02	0.62	-0.04	-0.11	-0.95	-1.07	0.3	0.12	-0.3	-0.17	-0.1	-0.03	-0.09	-0.82	0.48	0.76	0.16	-0.48	1.23	0.06	0.03	-0.62
GENE3359X	IMAGE:502603	119326 RAB23 RAB23, member RAS oncogene family Hs.94769 AA134569	1	0.04	0.39	-1.23	-0.31	-0.01	-0.23	-0.38	0.05	0.77	0.79	0.31	0.29	-0.29	1.04	0.51	0.52	-0.22	0.01	-0.58	-0.63	0.01	0.15	0.03	0.01	0.2	-0.21	-0.53	0.37	-0.96	-0.82	-0.47	-0.29	-0.43	0.12	0.16	0.46	0.11	0.26	0.18	1.18	0.43	-0.53	0.07	-0.54	-0.8	-0.58
GENE1835X	IMAGE:341821	110612 RAB23 RAB23, member RAS oncogene family Hs.94769 W60718	1	-0.14	0.42	-0.49	0.33	-0.35	-0.02	-0.05	0.2	0.57	0.48	-0.09	0.23	-0.52	0.67	0.46	0.75	-0.48	0.07	-0.22	-1.2	-0.49	0.41	-0.06	-0.02	0.47	0.51	0.11	0.12	-0.51	-0.93	-0.46	0.45	-0.51	0.21	0.47	0.46	-0.12	0.42	0.22	0.62	0.77	-0.39	-0.1	0.07	-0.35	-0.79
GENE2269X	IMAGE:1601959	113055 ESTs Hs.130213 AI002416	1		0.56	-1	-0.53		-0.03	0.71	-0.21		0.25		0.65	-0.32	-0.11	-0.5		0	-0.12		-0.04	-0.57	-0.62	0.77		0.35	0.37	-0.62	0.36	-0.93	-1.58	-1.47	-0.37	-0.83	-0.44	0.64	0.82		0.1	0.04	0.54	0.66		0.21	0.07	-0.77
GENE4408X	IMAGE:289794	224106 Homo sapiens mRNA; cDNA DKFZp434O0227 (from clone DKFZp434O0227) Hs.44787 N59295	1	0.15	0.09		-0.16	-0.35	-0.58			0.27	0.11	1.62	1.11	-0.17	0.64	-0.53	-1.06	0.15	-0.57	0.01	-0.25	-0.12	0.27	0.23	0.12	-0.09	-0.9	-0.18	0.29	-1.91	-1.27	-0.43	-0.11	-1.09	-0.58	-0.19	0.26	0.24	-0.16	1.05	0.57	0.25	-0.57	-0.25	-0.54	0.55	-1.27
GENE4053X	IMAGE:1558505	222118 GROS1 growth suppressor 1 Hs.10114 AA976184	1	0.41	0.04	-0.82	-0.3	0.13	0.74	-0.2	1.1	0.41	1.37	1.05	0.61	0.38	0.46	-0.25	-1.76	0.1	0.95	-0.11	0.4	-0.13	0.04	-0.26	-0.06	-0.07	-0.16	-0.2	0.25	-0.53	-0.36	-0.32	0.09	-0.73	-0.24	-0.05		0.37	-0.38	0.03	0.77	-0.3	-0.34	-0.46	-0.24	0.17	1.17
GENE3295X	IMAGE:713696	118928 TIMP1 tissue inhibitor of metalloproteinase 1 (erythroid potentiating activity, collagenase inhibitor) Hs.5831 AA284534	1	0.72	0.45	-1.09	0.12	-0.44	-1.05	-1.11	1.4	0.29	1.25		0.2	0.38	1.27	-0.35	0.49	1.12	0.08		-1.57	0.44	-0.05	-0.66	-0.85	0.04	-0.2	0.15	0.35	-0.15	0.56	-0.57	-1.45	-1	-0.87	0.64	0.07	1.19	-1.66	0.16	0.25	-0.34	-1.49	0.28	0.84	0.34	-0.05
GENE3422X	IMAGE:265694	119752 N25353	1	-0.15	0.05	-0.43	0.36	0.4	-0.81	0.28	0.51	-0.31	0.65	-0.38	0.05	-0.02	0.28		-0.38	0.4	0.08	-0.3	-1.33	-0.95	-0.93	-0.27	-0.52		-0.14	-1.1	-0.88	0.23	-0.04	-1.01	-0.53	-0.89	-0.88	0.14	0.23	0.79	-0.48	0.34	0.21	-0.3	0.44	-0.36	0.46	-0.08	0.45
GENE2180X	IMAGE:823656	112591 DKFZP586L151 DKFZP586L151 protein Hs.43658 AA489616	1	-0.3	0.17	-0.59	0.26	0.4	-0.88	0.3			0.55	-0.18	-0.24	-0.49	0.48	-0.19	-0.01	0.07	0.38	-0.61	-0.69	-1	-0.69	-0.21	-0.77	-0.56	-0.46	-0.7	-0.13	0.36	-0.16	-0.31	-0.58	-0.53	-0.83	0.17	0.57	0.71	-0.8	0.37	0.45	0.57	-0.02	-0.35	0.39	0.24	0.6
GENE1608X	IMAGE:666169	109254 MTR 5-methyltetrahydrofolate-homocysteine methyltransferase Hs.82283 AA233640	1	-0.21	0.18	-0.69	-0.01	0.45	-0.5	-0.05	-0.46	0.22	0.57		-0.13	-0.13		-0.31		0.11	-0.18	-0.32	-0.78	-0.72	-0.77	-0.83	-0.43	-0.72	-0.17	-0.8	-0.38	-0.38	-0.18	-0.32	-0.53	-0.22	-0.73	0.15	0.31	0.14	-0.53	-0.07	0.18	0.56	-0.05	-0.28	0.19	0.11	0.45
GENE1537X	IMAGE:754093	108898 NID2 nidogen 2 Hs.82733 AA478659	1	-0.13	0.03	-0.79	0.18	0.3	-0.4	0.72	-0.18	0.43	1.53	-1.13	-0.01	-0.46	0.51	-0.36	0.45	-0.01	1.03	-0.14	-0.43	-0.59	-0.6	0.12		-0.22	0.44	-0.44	-0.24	-0.54	-0.63	0.43	0.41	0.06	-0.43	0.1	0.38	0.24	0.39	0.1	0.45	0.6	0.06	0.41	0.13	-0.35
GENE403X	IMAGE:1593317	102351 PDGFRB platelet-derived growth factor receptor, beta polypeptide Hs.76144 AI002365	1	0.55	0.53	-0.78	-0.18	0.21	-0.57	0.5	0.05	0.38	1.43	0.65	-0.69	-1.17	-0.68	-1.16	0.08	0.17	0.73	0.75	-0.2	-0.64	-0.76	-0.26	-0.82	-0.37	-0.01	-1.23	-0.07	-0.53	-0.76	-0.76	-0.2	-0.71	-1.33	-0.04	0.99	0.36	-0.45	0.29	0.9	0.02	0.81	-0.08	0.13	-1.11	-0.73
GENE1153X	IMAGE:841070	106693 YARS tyrosyl-tRNA synthetase Hs.239307 AA486761	1	0.49	0.19	0.05	0.31	0.03	-0.53	-0.01	-0.01	0.41	0.49	-0.12	0.13	-0.29	0.47	-0.41	-0.26	0.07	-0.08	0.19	-0.09	-0.28	-0.58	0.09	0.06	-0.16	-0.61	-0.09	-0.24	-0.44	-0.63	-0.43	-0.44	-1.09	-0.81	-0.15	0.39	0.09	-0.77	0.02	0.24	0.2	0	0	0.16	-0.81	-0.27
GENE3185X	IMAGE:68605	118242 IGFBP7 insulin-like growth factor binding protein 7 Hs.119206 T53297	1	0.58	0.1	-0.34	0.66	-0.07	-0.24	0.27	-0.24	-0.13	0.71	0.17	-0.16	-0.76	0.33	-0.78	-0.85	0.15	0.42	0.15	-0.47	-0.72	-0.39	-0.15	-0.25	-0.53	-0.81	-0.95	-0.22	-0.62	-0.6	-0.71	-0.67	-1.25	-1.1	-0.06	0.83	0.22	-1.03	-0.03	0.77	0.65	0.16	0.37	0.24	-1.42	-0.12
GENE4102X	IMAGE:462603	222350 ESTs Hs.93102 AA704965	1	0.52	0.35	0.06	0.47	-0.03	-0.19	-0.02	-0.52	0.37	0.59	-0.96	0.16	-0.77	0.31	-0.41		0.18	-0.33	-0.09	-0.11	-0.36	-0.3	-0.04	-0.3	-0.6	-0.88	-1.27	0.03	-0.41	-0.61	-0.53	-0.64	-0.73	-0.96	0.53	0.21	0.47	-1.12	0.26	0.55	0.58	0.11	0.19	0.57	-1.1	-0.17
GENE701X	IMAGE:595001	103973 LOC83690 CocoaCrisp Hs.182364 AA164781	1	0.26		-1.22		-0.08	0.47	0.35		1.61			0.45	-0.48	-0.34	-1.05		0.65			-0.14	-0.91		-0.32	-0.88	-0.47	-0.56	-1.28	-0.72	-0.45	-0.52	-1.3	-0.46	-0.67	-0.05	-0.13	0.1	-0.11	-0.3	-0.35	1.27	2.31	-0.33	1.37	0.57		-1.3
GENE2102X	IMAGE:291880	112166 MFAP2 microfibrillar-associated protein 2 Hs.83551 N67487	1	0.84	0.03	-1.6	-0.05	-0.28	0.13	0.9	2.1	1.13	2.18	3.85	1.8		-0.34	-3.15	0.24	-0.33	-0.07	-0.11	0.8	0.01	-0.52	0.31	0.3	0.37	0.02	-0.11	0.54	-0.67	-0.81	-0.64	-0.05	-0.11	-0.99	0.32	1.4		0.14	1.16	1.88	0.72	-0.47	-0.17	-0.55	2.38	-0.85
GENE2466X	IMAGE:144881	114204 CALU calumenin Hs.7753 R78585	1	0.12	0.38	-0.8	-0.21	0.43	0.5	0.22	0.88	0.35	1.21	0.8	1.04	-0.07	0.72	-0.19			0.69	-0.37	0.44		0.17	0.4	0.04	0.47	0.02	-0.01	0.47	-0.15	0.1		0.34	-0.53	0.29	-0.5	0.48	0.55	0.05	0.44	0.87	0.81	-0.42		-0.3		0.98
GENE1380X	IMAGE:772425	107998 FAP **fibroblast activation protein, alpha Hs.418 AA405569	1	0.04	0.43	-0.84	-0.69	0.47	-0.81	-0.02	-0.18	0.05	1.64	-1.12	-0.6	-0.03	0.29	-1.29	-0.68	-0.31	0.36		-0.81	-0.41	-0.04	0.07	0.07	0.41	-0.16	-0.36	1.28	-0.26	-0.43	-0.64	0.69	-0.53	-0.74	1.18	-0.76	1.09	0.33	1.41	1.2	1.31	-0.52	0.35	0.15	-0.62	-1.14
GENE3X	IMAGE:841282	100024 SFRP4 secreted frizzled-related protein 4 Hs.105700 AA486838	1	0.55	-0.33	-1.47	-0.73	0.59	-0.67	0.64	0.75	0.4	1.79		-1.48	0.53	-0.14	-1.09	-1.56	0.55	0.86	-1.42	-0.46	-0.87	-0.3	-0.39	-0.57	-0.23	-0.71	-0.48	0.93	-1.21	-1.37	-0.45	0.32	-1.08	0.78	0.53	-0.9	0.21	-1.16	1.87	1.62	1.41	-1.25	1.74	-0.18	-0.53	-1.61
GENE2607X	IMAGE:265853	114989 TEM8 tumor endothelial marker 8 Hs.8966 N20989	1	0.37	-0.53	-1.16	-0.61	0.39	-0.37		0.27	0.49	1.76	-0.14	-0.48	-0.21	0.19	-1.75	0.37	0.15	0.47	-0.23	0.1	-0.59	0.63	0.99	-0.02	0.84	-0.39	-0.21		-0.59	0.39	0.2	-0.04	-0.15	-0.52	0.07	1.41	0.59	0.13	0.91	1.55	1.86	0.09	0.57	-0.86	-0.54	-0.82
GENE677X	IMAGE:204545	103839 TEM8 tumor endothelial marker 8 Hs.8966 H58644	1	0.59	-0.07	-1.03	-0.29	0.24	-0.45	0.52	-0.04	-0.43	1.16	0.28	-0.37	-0.32	-0.01	-1.16	0.4	0.5	-0.46	-0.02	-0.39	-0.5	0.09	0.27	-0.21	0.39	0.4	-0.48	1.3	-0.72	-0.72	-0.25	0.38	-0.32	-0.03	0.27	0.48	0.18	-0.32	1.22	1.62	2.33	0.18	0.9	0.24	-1.22	-1.04
GENE4368X	IMAGE:868168	223892 SPRR2A small proline-rich protein 2A Hs.11261 AA633825	1	0.54	0.48	-0.45	-0.29	0.44	0.92	0.98	0.15	-0.03	0.65	-1.5	-0.19	-0.51	-0.08	-1.47		0.39	-0.01		-1.35	-0.65	-0.76	0.06	-0.04	0.66	-0.35	-0.2	0.4	-0.7	-0.05	-0.76	0.53	-1.12	-0.93	0.66	1.26	1.2	0.7	1.47	1.79	0.22	-0.77	-0.35	0.36	-0.83	-0.87
GENE4366X	IMAGE:853367	223884 PGRMC2 progesterone receptor membrane component 2 Hs.9071 AA663309	1	0.28	0.07	-0.39	-0.14	0.3	0.79		-0.01	0.12	1.12		-0.3	-0.1	0.06	-0.83	-0.22	0.22			-0.41	-0.34	0.36	0.39	0.26	0.32	-0.41	-0.23	0.49		-0.19	-0.67	0.68	-0.67	-0.98	0.55		0.86	0.56	1.32		1.17	-0.44	-0.18	0.51	-0.9	-0.76
GENE1854X	IMAGE:813823	110722 LUM lumican Hs.79914 AA447781	1	0.08	0.78	-0.5	1.09	0.46	-0.9	-0.02	0.25	0.12	2.04		-0.34	-0.46		-1.84	-0.14	0.4	-1.81	-0.17	-1.05	-0.87	-0.8			0.18	-0.06	-0.67	0.57	-0.9	-0.89		-0.48	-1.1	-0.53	0.42	0.03	-0.14	-0.15	1.75	0.87	1.08	0.1	-0.07	-0.47	-1.12	-1.2
GENE471X	IMAGE:471855	102662 AA035657	1	0.73	0.58	-0.89	1.1	0.45	-1.08	0.54	0.38	-0.03	1.93		-0.56	-0.06	-0.06	-3.57	-0.55	0.57	0.22		-1.52	-1.28	-0.67	0.93	0.11	0.76	0	-0.79	0.93	-0.72	-1.12	-0.68	0.04	-1.41	-1	0.61	0.34	0.6	0.12	0.96	1.57	1.24	0.82	0.04	-0.21	-1.99	-2.13
GENE3211X	IMAGE:795498	118455 HS1-2 putative transmembrane protein Hs.99364 AA454207	1	0.43	0.23	-0.58	0.33	0.44	-0.72	1.37	0.31	-0.2	1.19	-0.27	-0.5	-0.62	-0.63	-1.93	-0.09	0.18	0.43	0.19	-1.05	-0.81	-1.08	0.25	0.06	0.3	-0.39	-0.96	0.17	-0.57	-0.85	-0.39	0.08	-1.2	-0.68	0.8	0.89	-0.24	-0.02	0.44	1.28	0.65	1.06	0.27	0.14	-1.33	-1.61
GENE2001X	IMAGE:796505	111639 Homo sapiens cDNA FLJ10196 fis, clone HEMBA1004776 Hs.12680 AA460239	1	0.56	0.36		-0.28	-0.01	-0.17	1.11	-0.21	0.4	0.61	-0.59	0.55		0.24	-1.2		0.34	0.87	-0.41	-0.53	-0.76	-0.52	0	0.39	0.17	0	-0.33	0.61	-0.55	-0.11	0.1	-0.13	-0.5	-1.14	0.31	1.51		0.11	0.78	1.56	0.99	-0.32	0.08	-0.39		-0.97
GENE1807X	IMAGE:714106	110389 PLAU plasminogen activator, urokinase Hs.77274 AA284668	1	0.55	0.2	-2.22	-0.21	0.34	-0.65	0.81	0.31	0.42	2.25	0.71	0.46	-0.27	0.56	-0.81	0.26	0.56	1	0.11	-0.31	-0.23	-0.85	0.51	-0.61	0.6	-0.04	-0.22	1.05	-1.05	0.01	-0.22	-0.06	0.13	-0.91	0.25	2.27	2.49	-0.2	1.04	1.05	0.42	-0.03	0.04	-0.3	-0.54	-2.09
GENE5478X	IMAGE:2012757	309831 D2S448 Melanoma associated gene Hs.118893 AI356709	1	0.28	0.74	-0.19	-0.8	0.8	-0.87	-0.3	0.02	0.34	1.16	1.3	0.06	0.21	0	-0.23	-0.21	-0.32	0.95	-0.18	0.69	-0.45	0.19	0.62	0.16	0.26	0.49	-0.15	0.27	-0.72	-0.34	-0.52	-0.4	-0.51	-1.32	-0.28	0.72	0.37	-0.06	0.16	1.03	0.28		-0.59	-0.05	-0.78	-1.07
GENE3063X	IMAGE:345601	117526 D2S448 Melanoma associated gene Hs.118893 W72043	1	-0.14		-1.17	-0.86	0.04	-0.54	0.75	0.02	0.49	1.13	1.37	0.03	-0.22	0.71	-0.36	-0.13	0.08	1.04	0.33	0.05	-0.97	-0.65	0.42	0.04	0.16	0.05	-0.71	0.19	-0.98	-0.12	-0.52	-0.46	-0.8	-1.23	0.07	0.85	0.48	-0.45	0.44	1.24	-0.38	-0.13	-0.54	-0.12	-0.81	-1.23
GENE2385X	IMAGE:868212	113722 TGFBI transforming growth factor, beta-induced, 68kD Hs.118787 AA633901	1	0.56	0.21	-1.76	-0.44	0.05	-1.15	-0.43	0.18	1.09	2.45	1.22	0.79	-0.14	0.78	-0.85	0.05	-0.16	0.44	-0.15	-0.56	-0.68	0.62	0.63	-0.31	0.43	1.07	-0.64	0.48	-0.82	-0.13	-0.88	-0.01	-0.12	-0.37	0.09	1.63	2.13	0.34	0.34	1.28	1.14	-0.54	0.22	-0.41	-0.49	-1.97
GENE144X	IMAGE:191664	100797 THBS2 thrombospondin 2 Hs.108623 H38013	1	0.13	0.18	-1.25	-0.59	0.5	-1.35	0.87	1.28	0.16	1.9	-1.12	-0.83	0.04	0.62	-1.34		0.09	0.45	-1.3	-1.05	-0.71	0.03	0.38	-0.04	0.66	0.14	0.81	0.85	0.03	-0.45	-0.73	0.31	-1.12	-0.19	0.66	0.55	1.23	0.05	0.88	1.72	1.31	-0.59	1.26	1.72	-0.89	-0.23
GENE2645X	IMAGE:345849	115196 LOX lysyl oxidase Hs.102267 W70343	1	-0.34	0.9	-0.01	-0.19	0.24	-0.07	0.13	-0.84	-0.71	0.49		0.93	0.48	0.82	-1.07	-0.33	0.09	0.24		-0.28	-0.64	0.37	0.48	0.67	1.15	0.73	0.02	1.03	0.09	-0.09	-0.52	0.42	-0.51	-1.08	0.37	0.44	0.96	0.57	1.07	1.24	0.61	-0.07	-0.02	0.11	0.04	1.26
GENE1735X	IMAGE:375834	109984 LOX lysyl oxidase Hs.102267 AA037732	1	-0.01	0.27	-0.67	-0.02	0.65	-0.58	0.62	-0.56	-0.64	0.96		0.27	0.47	1.23	-1.47	-0.13	-0.03	0.78		-1.17	-1.28	-0.03	1.57	0.74	1.42	0.96	-0.25	1.47	-0.2	-0.06	-0.74	0.16	-0.91	-1.18	0.46	0.25	1.26	0.55	1.01	1.28	0.17	-0.51	-0.28	-0.32	-0.28	1.59
GENE5675X	IMAGE:248829	311177 LOX lysyl oxidase Hs.102267 H80736	1	-0.02	0.56	-0.55	0.08	0.49	-0.35	-0.03	-0.28	-0.23	1.5	0.28	0.32	0.63	1.14	-1.14	0.07	0.36	0.81	-0.5	-0.39	-0.52	0.42	1.16	0.22	1.41	0.58	-0.09	1.1	0.06	0.1	-0.58	-0.05	-0.85	-0.83	0.29	0.6	1.4	0.71	0.95	1.28	0.47	-0.27	-0.02	-0.18	-0.32	1.41
GENE1577X	IMAGE:262060	109084 LOX lysyl oxidase Hs.102267 H99075	1	0.09	0.38	-0.35	-0.07	0.5	0.26	0.32	1.19	-0.01	1.12	0.6	0.46	0.49	0.93	-0.45	0.3	0.24	0.68	-0.1	-0.46	-0.98	-0.03	0.29	-0.08	1.57	0.56	0.05	-0.01	0.03	-0.04	-0.38	0.03	-0.29	-0.37	-0.21	0.55	1.12	0.65	0.52	1.3	0.37	-0.19	-0.17	-0.19	-0.31	0.97
GENE3001X	IMAGE:418262	117138 COL3A1 collagen, type III, alpha 1 (Ehlers-Danlos syndrome type IV, autosomal dominant) Hs.119571 W90740	1	0.84	0.82	-1.56	-0.04	0.18	-0.89	1.46	0.8	1.11	0.94	0.23	-0.27	-0.19	0.12	-2.1	1.14	-0.06	-0.49	-0.39	0.77	-0.2	-0.22	0.79	0.04	0.88	0.43	0.09	1.31	0.38	-0.34	0.22	0.89	-0.39	-0.8	1.46	1.8		0.63	1.13	2.64	1.8	0.69	0.33	0.12	-0.11	-1.41
GENE2861X	IMAGE:767851	116443 FBN1 fibrillin 1 (Marfan syndrome) Hs.750 AA418674	1	0.54	-0.12	-1.31	0.02	0.04	-0.83	0.69	-0.03	-0.01	1.18	0.26	-0.26	-0.03	-0.02	-1.41	-0.23	-0.78	0.06	-0.06	-0.35	-0.89	-0.27	0.61	-0.41	0.55	0.34	-0.17	0.51	0.1	-0.31	-0.67	0.31	-0.69	-0.88	0.36	0.83	0.9	0.36	0.31	1.54	1.16	-0.1	-0.01	0.42	-0.37	-0.49
GENE6310X	IMAGE:1026766	319726 Homo sapiens mRNA full length insert cDNA clone EUROIMAGE 1913076 Hs.41271 AA664472	1	0.68		-1.21	0.06	-0.03	-0.37	1.28	1.12	0.84	1.12	-0.14	0.3	-0.18	0.55	-1.38	-0.92	0.27	-0.32	-0.97	-0.43	-0.14	-0.52	0.34	-0.15	0.37	-0.07	-0.28	0.02	-0.5	-0.34	-0.57	-0.06	-1.01	-0.45	0.8	0.56	1.95		0.76	1.19	0.68	0.21	1.02	0.19	-1.61	-0.72
GENE4133X	IMAGE:281908	222543 Homo sapiens mRNA full length insert cDNA clone EUROIMAGE 1913076 Hs.41271 N51859	1	0.27	0.5	-1.08		0.27	-0.24	0.44	1.8	1.08	1.25	-0.57	-0.12		0.39	-2.21	-1.43	0.28	0.15	-0.97	-0.82	-1.07	-0.19	1.1	0.02	0.64	0.09	-0.29	-0.7	-0.57	-0.7	-1.28	-0.99	-0.8	-0.62	0.27	0.43	2.48	0.18	0.9	1.24	0.75	0.16	1.05	-0.28	-1.67	-1.04
GENE4575X	IMAGE:434776	225055 FLJ20015 hypothetical protein Hs.80618 AA701863	1	0.28	-0.01	-1.24	-0.68	0.66	-0.83	-0.01	0.38	-0.22	0.47	0.26	0.11	0.35	0.03	-2.09	0.04	0.06	-0.41	-0.88	-0.45	-0.9	-0.32	0.27	0.31	0.94	0.31	-0.02	0.5	-0.02	-0.02	0.12	0.39	-0.8	-0.65	0.61	0.92	0.48	0.45	1.28	1.38	0.67	0.03		-0.37	0.37	-0.71
GENE2005X	IMAGE:758435	111665 TIEG **TGFB inducible early growth response Hs.82173 AA393766	1	0.72	0.25	-1.97	0.43	0.74	-0.97	0.63	0.32	0.99	1.99		0.1	-0.18	0.49	-1.77	0.87	0.46	1.87		-0.07	-0.95	0.24	1.46	0.6	0.85	1.35	-0.16	1.14	-1.24	-0.62	-0.4	0.54	-0.69	-0.63	0.71	1.35	1.05	0.67	1.17	1.9	1.1	-0.1	-0.08	-0.6	-1.61	-1.91
GENE1236X	IMAGE:786609	107265 COL12A1 collagen, type XII, alpha 1 Hs.101302 AA478481	1	0.88	0.06	-3.21	0.54	1.07	-0.73	1.57	0.96	0.74	2.3	0.12	-0.05	-0.28	0.03	-2.39	0.82	0.27	2.07	0.12	0.12	-0.88	-0.4	1.32	0.09	1.01	1.13	0.07	0.9	-1.12	-0.8	-0.21	0.89	-0.75	-0.59	0.82	1.75	0.82	0.66	1.57	2.28	1.58	-0.06	0.34	-1.41	-1.98	-2.2
GENE1772X	IMAGE:772880	110219 Homo sapiens hypothetical protein FLJ21127 (FLJ21127), mRNA Hs.351440 AA428455	1	0.22	0.3	-1.25	0.88	0.64	-1.02	0.79	0.76	-0.1	0.84	-0.05	-0.25	-0.01	0.53	-1.17	-0.05	-0.16	-0.07	-0.8	-1.26	0.04	-0.48		-0.27	0.04	0.15	-0.74	0.55	0.12	0.11	-0.5	0.19	-0.98	-0.23	0.71	1.11	1	0.18	1.17	1.98	1	-0.55	-0.19	-0.36	-0.66	-1.39
GENE3811X	IMAGE:753428	220604 Homo sapiens, Similar to RIKEN cDNA 1110014B07 gene, clone MGC:20766 IMAGE:4586039, mRNA, complete cds Hs.283713 AA406425	1	1.18	0.5	-2.66	0.86	0.71	0.82	0.36	0.01	0.96	2.04	-0.08	0.2	-0.2	0.52	-2.89	-0.7	0.1	0.8	-1.55	-1.3	-0.9		0.77	0.76	0.68	0.29	-0.2	1.02	-0.25	-0.81	-0.56	0.25	-1.14	-0.67		1.21	1.84	0.8	1.34	1.94	1.16	-0.21	0.74	-0.1	0.9	-1.14
GENE5627X	IMAGE:1585952	310794 ESTs Hs.128665 AA974305	1	1.42	0.53	-2.88	1.09	0.94	1.41	1.69	0.63		1.84	0.35	0.73	0.02	0.88	-2.14	-0.23	0.6		-1.43	-1.46	-0.9	-0.55		0.31	1.08	-0.04	-0.17	0.22	-0.14	-0.31	-0.98	0.25	-0.96	-0.23	0.65	1.97	2.13	0.96	1.68	2.37	0.79	-0.35	0.68	0.32	0.6	-0.64
GENE5769X	IMAGE:2308409	312399 KIAA1077 KIAA1077 protein Hs.70823 AI653116	1	0.89	-0.09	-2.03	0.16	0.89	-1.18	0.82	0.92	0.64		0.21	0.51	-0.02	1.35	-2.15	0.8	1.22	0.92	-1.02	-1.18	-0.4	1.09	1.51	0.55	1.41	0.98	0.64	2	0.01	0.07	0.1	0.85	-0.78	-0.05	1.52	1.53	1.06	0.51	1.82	2.27	1.57	-0.63	1.03	0.84	-1.29	-1.18
GENE2947X	IMAGE:140301	116870 Homo sapiens cDNA FLJ11041 fis, clone PLACE1004405 Hs.28792 R66924	1	0.34	-0.51	-1.86		0.33	-0.24	1.87	1.23	1.08	1.91	0.11	0.82		0.32	-1.74	0.68	0.54	0.54	-0.49	-0.54	-0.79	0.06	1.2	0.61	1.38	1.18	-0.22	1.19	0.47	0.08		0.48	-0.57	-0.52	0.97	1.82		0.84	1.01	1.94	1.77	-0.07	1.25	0.48	-0.91	-1.16
GENE5866X	IMAGE:1893136	313617 ESTs Hs.145968 AI278518	1	0	0.1	-0.74	-0.06	0.33	0.67	1.09	0.42	0.76	1.51	0.79	-0.22	-0.79	-0.31	-2.19	-0.71	0.03	0.68	-0.44	-0.98	-0.59	0.04	0.84	-0.07	0.32	0.58	-0.73	0.55	-0.2	-1.14	-0.34	0.09	-0.85	-0.66	0.74	0.96	0.79	0.29	0.87	1.36	0.71	0.2	0.07	0.26	-1.39	-1.09
GENE1010X	IMAGE:414994	105845 COL1A2 collagen, type I, alpha 2 Hs.179573 W93067	1	0.3	0.53	-1.05	-0.61	0.27	-1.07	-0.31	0.68			0.04	-0.44	0	0.43	-2.15		0.25	0.62	-0.62	0	-1.21	0.2	0.76	0.35	1.42	0.19	0.37	0.3	-0.04	0.14	0.12	0.47	-0.26	-0.72	0.93	1.62	1.01	0.59	1.53	2.15	1.45	0.12	0.46	-0.16	-0.92	-0.15
GENE938X	IMAGE:429203	105460 COL5A2 **collagen, type V, alpha 2 Hs.82985 AA004204	1	0.36	0.38	-2.2	0.57	0.72	-1.23	0.94	-0.15	0.72	2.2		-0.12	-0.09	0.78	-1.82	0.58	0.01	1.23		-0.32	-1.42	0.11	0.64	0.58	1.13	0.69	-0.34	0.87	-0.48	0.07	0.16	0.31	-0.56	-1.27	0.2	1.61	1.05	0.79	1.32	2.23	1.64	0.27	0.05	-0.6	-0.3	-1.54
GENE3415X	IMAGE:1091502	119714 COL5A2 collagen, type V, alpha 2 Hs.82985 AA599273	1	0.21	0.46	-1.81	0.28	0.64	-1.03	0.7	0.17	0.52	2.13		-0.41	-0.04	0.77	-2.07	0.66	0.13	0.95		-0.21	-1.02	-0.16	0.96	0.58	1.2	0.43	-0.24	0.5	-0.64	0.1	-0.31	0.28	-0.77	-1.21	0.4	1.18	1.14	0.92	1.15	2.22	0.99	0.28	0.3	-0.56	-1.01	-1.21
GENE5424X	IMAGE:1434897	309448 COL5A2 collagen, type V, alpha 2 Hs.82985 AA857098	1	0.6	0.38	-2.06	0.56	0.81	-0.55	1.5	0.61	0.35	1.48	0.13	-0.07	0.07	0.35	-1.94	0.32	0.24	1.31	-0.09	-0.45	-1.26	0.07	0.76	0.25	1.12	0.52	-0.4	1.09	-0.68	-0.42	-0.44	0.96	-0.83	-0.98	0.84	1.55	0.95	0.84	1.32	2.24	1.03	0.46	0.25	-0.31	-0.75	-1.58
GENE879X	IMAGE:839991	105119 COL1A2 collagen, type I, alpha 2 Hs.179573 AA490172	1	0.71	0.42	-2.55	-0.01	0.64	-1.05	0.33	1.06	0.25	1.78	0.26	-0.46	0.6	0.4	-2.88		0.27	0.85	-0.3	-0.34	-1.6	0.3	1.36	0.83	1.22	0.83	0.07	0.92	-0.15	-0.15	-0.31	0.7	-1.08	-0.94	1.2	1.59	1.11	0.68	1.34	2.41	1.07		-0.17	-0.59
GENE1424X	IMAGE:122159	108262 COL3A1 collagen, type III, alpha 1 (Ehlers-Danlos syndrome type IV, autosomal dominant) Hs.119571 T98611	1	0.43	0.66	-2.11	0.42	0.44	-1.13	1.19	0.75	0.5	1.83	0.39	-0.61	0.33	0.38	-3.22	0.57	0.05	0.62	-0.53	-0.4	-1.41	0.03	1.08	1.07	0.95	0.73	-0.25	1.16	-0.49	-0.71	-0.63	0.84	-1	-1.07	1.06	1.85	0.83	1.2	1.07	2.16	0.97	0.39	-0.27	-0.4	-0.71	-1.59
GENE2029X	IMAGE:2256743	111790 COL3A1 collagen, type III, alpha 1 (Ehlers-Danlos syndrome type IV, autosomal dominant) Hs.119571 AI679372	1	0.72	0.63	-2.14	0.19	0.63	-1.28	0.13	0.96	0.09			-0.88	0.34	0.23	-3.17	0.64	0.05	0.83		-0.4	-1.37	0.13	1.4	0.76	1.25	0.59	-0.53	1.34	-0.49	-0.63	-0.72	0.41	-1.17	-1.17	0.86	1.13	1.05	0.75	1.17	2.24	1.03	0.25	-0.51	-0.66	-0.67	-1.48
GENE565X	IMAGE:488370	103176 COL3A1 collagen, type III, alpha 1 (Ehlers-Danlos syndrome type IV, autosomal dominant) Hs.119571 AA044829	1	0.84	0.69	-2.11	0.52	0.47	-1.27	0.14	0.74	0.37	1.58		-0.6	0.56	0.3	-3.27	0.49	0.03	0.41		-0.53	-1.41	-0.06	1.26	0.56	0.61	0.54	-0.14	1.14	-0.58	-0.96	-0.85	0.32	-1.16	-1.21	0.85	1.21	0.79	0.79	0.87	1.95	0.83	0.15	-0.5	-0.62	-0.88	-1.7
GENE1109X	IMAGE:358168	106445 Homo sapiens, Similar to RNA polymerase 1-3 (16 kDa subunit), clone MGC:21099 IMAGE:3847651, mRNA, complete cds Hs.279591 W95586	1	0.64	0.44	-2.04	0.48	0.57	-1.06	0.5	0.93	0.69	1.3		-0.74	0.3	0.42	-3.04	0.49	-0.32	0.77		-0.58	-1.51	-0.11	0.69	0.75	0.83	0.83	-0.49	0.62	-0.96	-0.95	-1.08	0.28	-1.44	-1.44	0.99	1.19	0.66	0.98	1.31	1.54	0.16	0.69	-0.64	-0.59	-0.95	-1.68
GENE5785X	IMAGE:1711148	312575 EST Hs.146445 AI127624	1		0.77	-2.07	0.43	0.68	-1.08	0.23	0.57	0.64	-0.3	0.38	-0.8	0.35	0.47	-3.18	0.39	-0.1	0.24	-0.27	-0.45	-1.23	0.12	1.16	0.75	1.36	0.32	-0.26	0.84	-0.65	-0.73	-0.61	0.58	-1.08	-1.5	0.94	1.33	1.13	0.87	1.29	1.9	1.12	0.33	-0.38	-0.47	-0.74	-1.48
GENE6258X	IMAGE:1711026	318932 ESTs Hs.143321 AI139422	1	0.34	0.16	-1.71	0.63	-0.24	-0.95	0.17	0.57	0.51	0.67	0.71	-1.07	-0.05	0.65	-2.22		-0.18	0.54	0.22	-0.8	-1.38	0.36	0.98	0.72	0.75	0.34	-0.55	0.22	-0.54	-0.55	-0.74	0.57	-1.03	-0.71	0.9	0.9	0.5	0.45	0.98	1.15	0.49	-0.42	-0.19	-0.17	-0.68	-0.99
GENE4270X	IMAGE:153646	223310 COL1A1 collagen, type I, alpha 1 Hs.172928 R48843	1	1.36	0.68	-2.71	-0.66	0.47	-1.34	0.51	1.85	0.91	2.76	-0.11	-0.33	0.44	1.17	-2.55	1.21	0.66	1.35	-0.75	-0.68	-2.1	-0.41	1.33	0.64	1.76	0.7	-0.07	1.13	0.19	0.47	-1.34	0.8	-1.51	-0.34	0.31	2.2	1.63	0.36	2.22	2.91	-0.07	-0.38	-0.45	-0.09	-1.16	-1.02
GENE445X	IMAGE:418193	102573 COL1A1 collagen, type I, alpha 1 Hs.172928 W90359	1	1	0.8	-1.99	-0.18	1.1	-1.33	-0.87	1.56	0.48	2.16		-0.66	0.69	1.34	-2.69	1.12	0.44	1.49		-0.19	-2.11	0.34	1.36	0.89	1.34	1.15	0.12	1.21	-0.45	0.38	-1.06	0.18	-0.99	-1.04	1.11	1.43	1.7	0.72	2.02	2.63	0.2	-0.5	-0.37	-0.65	-0.91	-1.12
GENE6471X	IMAGE:755238	98759 ABCA5 **ATP-binding cassette, sub-family A (ABC1), member 5 Hs.180513 AA422007	1	0.53	0.67	-1.26	-0.07	0.72	-0.83	-0.37	1.11	0.43	2.25	0.53	-0.24	0.45	0.62	-1.65	0.86	0.37	0.79	-0.69	-0.52	-1.19	0.32	1.34	0.68	1.21	0.89	0.53	0.97	-0.15	0.03	-0.34	0.28	-0.7	-0.61	0.47	1.07	1.14	0.63	0.81	1.24	0.52	-0.57	-0.31	-0.26	-0.54	-0.37
GENE2239X	IMAGE:293917	112917 SPARC secreted protein, acidic, cysteine-rich (osteonectin) Hs.111779 N66035	1	0.57	0.24	-1.7	0.25	0.32	-0.56	0.18	0.55	0.17	1.85		-0.15	0.43	0.75	-1	0.31	-0.13	0.84		-0.31	-1.46	-0.14	0.7	0.42	0.85	0.47	-0.09	0.8	-0.02	-0.24	-0.41	0.33	-0.95	-1.11	0.56	1.01	0.85	0.7	0.55	1.89	1.26	0.19	0.01	0.14	-0.21	-0.85
GENE624X	IMAGE:487878	103510 SPARC secreted protein, acidic, cysteine-rich (osteonectin) Hs.111779 AA045463	1	0.51	0.32	-1.73	0.05	0.39		0.32	0.93	0.22	1.87		-0.05	0.45	1.02	-1.13	0.41	0.04	1.12		-0.25	-1.51	0.17	0.83	0.2	0.75	0.59	-0.36	0.45	-0.35	-0.31	-0.77	0.26	-1.26	-1.24	0.45	0.75	0.79	0.62	0.63	1.71	0.58	-0.23	-0.11	-0.1	-0.72	-0.71
GENE2695X	IMAGE:250654	115502 SPARC secreted protein, acidic, cysteine-rich (osteonectin) Hs.111779 H95959	1	0.57	0.3	-1.7	0.09	0.4	-0.61	0.21	0.56	0.07	1.65	0.39	-0.24	0.53	0.46	-1.18	0.18	-0.22	0.79	0.07	-0.47	-1.32	0.32	0.55	0.15	0.77	0.46	-0.53	0.61	-0.07	-0.39	-0.53	0.32	-1.09	-1	0.46	0.92	0.71	0.65	0.5	1.79	1.08	0.05	-0.1	-0.02	-0.71	-0.66
GENE904X	IMAGE:138991	105228 COL6A3 collagen, type VI, alpha 3 Hs.80988 R62603	1	1.17	0.77	-1.89	0.06	0.52	-1.18	0.5	-0.23	0.73	1.71	0.33	-0.38	-0.65	-0.53	-3	-0.56	-0.31	1.12	-0.14	-0.48	-0.73	0.28	0.46	0.42	1.13	-0.2	-0.56	0.99	-1.27	-0.53	-0.5	-0.25	-0.62	-1.3	0.88	1.56	0.91	0.17	1.32	2.38	0.99	0.31	-0.09	-0.65	-1.2	-1.63
GENE4907X	IMAGE:122321	226840 CSPG2 chondroitin sulfate proteoglycan 2 (versican) Hs.81800 T99175	1	-0.06	0.08	-1.35	0.65	0.23	-1.26	0.59	0.5	-0.09	1.55	-0.21	-0.38	0.4	0.43	-1.73	-0.64	0.04	0.27	-0.96	-0.96	-1.27	-0.33	0.85	0.29	0.9	0.39		0.7	0.06	-0.75	-0.85	0.29	-0.88	-1.08	0.29	2.13	0.95	0.48	0.48	1.49	1.04	0.05	0.12	0.29	0.68	-0.8
GENE1366X	IMAGE:377701	107937 CSPG2 chondroitin sulfate proteoglycan 2 (versican) Hs.81800 AA056022	1	-0.06	0.17	-1.22	0.71	0.39	-1.21	0.77	0.71	0.01	1.32		-0.08	0.2	0.79	-2.01	-0.26	0.16	0.61		-0.96	-1.24	0.04	0.58	0.29	0.28	0.3	-0.56	0.64	-0.55	-0.6	-0.98	0.2	-1.02	-1.38	0.27	2.43	0.89	0.02	1.05	1.41	0.29	-0.03	0.1	0.26	0.76	-1.2
GENE4156X	IMAGE:1435624	222670 CSPG2 chondroitin sulfate proteoglycan 2 (versican) Hs.81800 AA857944	1	-0.25	0.04	-1.28	0.62	0.46	-1.06	0.85	0.51	-0.48	1.12	-0.38	-0.36	0.26	0.63	-2.05	-0.44	0.02	0.11	-0.75	-1.08	-1.1	0.13	0.69	0.23	0.34	-0.13	-0.71	0.44	-0.55	-0.69	-0.77	0.21	-1.18	-1.04	0.54	2.16	1.05	0.16	1.33	1.44	0.31	0.14	0.09	0.07	0.65	-0.91
GENE527X	IMAGE:489631	102967 CSPG2 chondroitin sulfate proteoglycan 2 (versican) Hs.81800 AA098997	1	-0.08	-0.13	-1.37	0.52	0.42	-0.97	0.72	0.7		0.91		-0.3	0.41	0.38	-1.77	-0.66	0.09	0.16		-0.93	-1.11	0.08	0.48	-0.09	0.46	0.31	-0.18	0.35	-0.32	-0.59	-0.75	0.27	-0.81	-1.06	0.39	2.09	0.92	0.21	0.9	1.3	1.17		0.13	0.26	0.59	-0.78
GENE1982X	IMAGE:470546	111515 **Homo sapiens cDNA FLJ14755 fis, clone NT2RP3003145, moderately similar to Mus musculus metallocarboxypeptidase CPX-1 mRNA Hs.177536 AA031596	1	0.21	-0.04	-1.34	0.01	0.23	-0.9	-0.15	0.61	0	1.27		-0.71	-0.3	0.56	-1.45	-0.09	0.09	0.9		-0.34	-1.25	-0.1	0.57	0.06	0.13	0.26	-1.03	0.48	-0.85	-0.66	-1.36	0.05	-1.65	-0.95	-0.1	-0.04	0.55	-0.13	0.59	1.15	0.55	0.25	-0.17	-0.3	-1.14	-0.63
GENE507X	IMAGE:489129	102847 FBN1 fibrillin 1 (Marfan syndrome) Hs.750 AA056415	1	0.73	0.17	-1.14	0.56	0.34	-1.09	0.41	0.38	-0.39	1.46		-0.28	-0.62	0.06	-1.78	-0.56	-0.01	0.02		-1.04	-1.14	-0.67	0.43	0.19	0.04	0.23	-0.67	-0.08	-0.88	-1.06	-1.39	-0.31	-1.49	-1.09	-0.03	0.56	0.62	-0.04	0.76	1.08	0.72	-0.47	-0.46	-0.22	-1.15	-0.32
GENE6625X	IMAGE:625384	99636 FSTL1 follistatin-like 1 Hs.296267 AA181288	1	0.6	0.4	-1	0	-0.26	-0.37	0.76	-0.3	0.31	1.31		0.14	-0.86	0	-1.58	-0.38	0.08	0.62		-0.48	0.01	0.14	0.15	-0.06	-0.09	-0.29	-0.81	0.21	-1.1	-0.66	-0.77	-0.16	-1.24	-0.94	-0.17	1.33	0.1	-0.33	0.53	1.02	0.78	-0.01	-0.02	-0.12	-1.38	-0.78
GENE5504X	IMAGE:1669672	309986 THY1 Thy-1 cell surface antigen Hs.125359 AI057267	1	1.13	0.55	-0.99	0.47	0.35	-0.85	-0.04		0.55		0.66	-0.54	-0.28	0.08	-1.28		0.33	1.41	-0.15	-0.4	0.19	-0.11	0.63	-0.23	-0.29	-0.43	-0.62	0.18	-0.65	-0.21	0.12	-0.34	-0.85	-0.92	0.54	0.73	0.43	-0.67	0.73	1.52	0.5	0.78	-0.39	-0.53	-0.45	-0.83
GENE358X	IMAGE:1926620	102116 THY1 Thy-1 cell surface antigen Hs.125359 AI346653	1	0.64	0.41	-1.27	0.16	0.24	-1.02	-0.14	0.11	0.65	2.01		-0.61	-0.25	0.76	-0.97	-0.11	0.38	0.44		-0.12	-0.75	-0.05	0.66	-0.03	0.48	-0.02	-0.5	0.78	-0.26	-0.51	-0.33	-0.34	-0.85	-1.23	-0.07	0.28	0.37	-0.63	1.15	1.56	0.43	0.38	-0.57	-0.34	-0.45	-0.79
GENE1356X	IMAGE:769686	107861 THY1 Thy-1 cell surface antigen Hs.125359 AA428836	1	0.99	0.47	-1.07	0.32	0.38	-0.8	-0.07	0.29	0.39	1.94	0.64	-0.52	-0.06	0.16	-1.17	-0.53	0.14	0.73	-0.05	-0.38	-0.73	-0.21	0.22	0.16	0.26	0.09	-0.38	0.45	-0.47	-0.45	-0.54	-0.25	-0.73	-1.07	0.02	0.56	0.41	-0.71	0.25	1.26	0.32	0.31	-0.53	-0.49	-0.61	-0.53
GENE2898X	IMAGE:1323785	116645 THY1 Thy-1 cell surface antigen Hs.125359 AA877226	1	1.06	0.6	-1.33	0.02	0.22	-0.71	0.05		0.16	1.65	0.32	-0.41	0.13	0.42	-1.48	-0.15	0.2	0.73	-0.02	-0.5	-0.96	-0.14	0.5	0.08	0.05	0.39	-0.47	0.44	-0.68	-0.4	-0.98	-0.42	-1.15	-1.07	-0.06	0.34	0.43	-0.81	0.46	1.16	-0.44	0.2	-0.75	-0.44	-0.87	-0.7
GENE559X	IMAGE:1324976	103133 ESTs Hs.128065 AA740376	1	0.82	0.24	-0.86	0.37	0.42	-0.49	0.48	0.35	0.01	0.68	0.31	0.17	-0.28	1	0.34	0.04	0.11	0.47	-0.17	-0.75	-0.83	-0.85	0.51	-0.02	0.03	0.05	-0.51	-0.15	-0.58	-0.27	-0.56		-0.94	-0.67	-0.11	0.38	0.24	-0.43	0.52	1.06	-0.55	0	-0.53	-0.54	-0.7	-0.69
GENE96X	IMAGE:756402	100507 AA482115	1	0.18	0.61	-0.67	-0.04	0.38	-0.49	0.58	0.73	0.45	1.48	0.98	0.38	0.36	0.78	-0.35	0.75	0.46	0.95	-0.21	-0.26	-0.77	-0.39	0.96	0.75	0.87	0.48	0.19	0.39	0.24	0.06	-0.33	0.08	-0.68	-0.4	0.31	0.96	0.52	0.6		1.02	-0.16	-0.33	-0.13	-0.17	-0.44	-0.83
GENE63X	IMAGE:244147	100311 BGN biglycan Hs.821 N51018	1	-0.04		-0.91	-0.48	-0.37	-1.19	0.34	1.48	0.29	0.91	0.65	-0.51	0.05	0.62	-0.91	0.19	-0.03	0.38	-0.58	-0.46	-1.23	-0.24	1.17	-0.04	0.76	0.04	-0.72	0.54	-0.18	-0.26		-0.13	-0.87	-0.63	0.21	1.03	1.22	0.12	1.1	1.16	0.58	0.38	0.5	0.62	0.63	-0.43
GENE1952X	IMAGE:144786	111282 BGN biglycan Hs.821 R77226	1	-0.01	0.01	-0.74	-0.21	-0.49	-1.19	-0.29	1.7	0.44	1.41	0.07	-0.81	-0.01	0.22	-0.83	0.4	0.17	-0.03	-0.61	-0.41	-0.83	0.03	0.54	0.02	0.84	-0.27	0.1	0.1	0.16	0.13	-0.38	0	-0.64	-0.65	0.25	1.5	0.94	-0.47	0.13	1.43	0.88	0	0.41	0.63	1.03	0.09
GENE2480X	IMAGE:345925	114280 KRT5 keratin 5 (epidermolysis bullosa simplex, Dowling-Meara/Kobner/Weber-Cockayne types) Hs.195850 W72110	1	0.04	0.27	-0.59	0.38	0.21	-1.03	0.35	0.71	0.61			-0.39	0.29	0.91	-0.67	0.53	0.71			-0.33	-0.25	-0.07	0.32	-0.36	0.66	0.71	-0.35	0.61	-0.02	0.02	-0.45	0.26	-0.31	-0.86	-0.22	1.45	0.77	0.06	0.29	0.96	0.75	0.28	0.08	-0.07	-0.12	-0.41
GENE1069X	IMAGE:840726	106203 FN1 **fibronectin 1 Hs.287820 AA487845	1	1	0.81	-1.69	-0.61	0.7	-1.98	0.46		0.92		1.31	-0.15	0.93	1.11	-0.99	0.39	0.63	1.52	-0.85	-0.9	-0.74	0.52	1.72	0.2	1.46	1.37	0.54	1.6	0.06	0.31	-1.32	0.3	-1.15	-0.97	0.75	1.87	2.15	1.36	0.87	2.02	0.67	-1.23	0.57	0.72	-0.12	-0.89
GENE5930X	IMAGE:1554962	314338 ESTs Hs.270149 AA953560	1	0.82	0.58	-1.89	-0.79	0.53	-1.83	0.07	0.75	1.06	1.69	0.81	0.33	0.85	1.07	-0.76	1.08	0.15	0.73	-0.31	-0.6	-0.79	0.43	1.92	0.02	1.88	1.21	0.54	1.47	0.55	0.24	-0.67	0.9	-1.12	-0.46	1.23	1.63	2.08	1.31	0.18	2.21	0.84	-0.95	0.83	1.08	0.37	-0.85
GENE1734X	IMAGE:1870935	109983 FN1 **fibronectin 1 Hs.287820 AI262682	1	0.75	0.36	-2.06	-0.96	0.67		0.07	1.37	0.97	1.31	0.65	-0.26	0.49	1.22	-0.72	0.72	-0.01	0.71	-1.05	-1.03	-0.85	0.53	1.7	0.16	1.23	1.32	0.67	1.42	-0.1	0.05		0.9	-1.13	-0.02	1.18	1.35	1.64	1.15	1.2	1.86	1.01	-1.61	0.8	0.92	0.09	-0.63
GENE863X	IMAGE:139009	104992 FN1 fibronectin 1 Hs.287820 R62612	1	1.13	0.09	-1.96	-0.95	0.67	-1.28	0.72	1.22	0.79	1.41	0.71	-0.04	0.92	1.02	-0.24	0.6	0.1	0.81	-1.16	-1.17	-1.14	-0.04	1.7	0.38	1.22	1.57	0.78	1.19	0.8	0.3	-0.39	0.89	-0.06	0.17	1.03	1.86	1.33	1.47	1.17	2.19	0.91	-0.84	1.13	1.2	0.54	-0.85
GENE959X	IMAGE:142788	105588 SERPINH2 serine (or cysteine) proteinase inhibitor, clade H (heat shock protein 47), member 2 Hs.9930 R71093	1	-0.03	0.05	-1.94	-0.04	0.84	0.02	0.18	0.42	1.35	2.47	0.76	0.49	0.41	0.13	-1.26		-0.04	1.07	0.35	0.41	-0.41	-0.29	0.78	0.2		0.32	1.2	0.44	-0.4	-0.32	0.11	0.18	-0.12	-0.18	0.23	1.34	1.17	0.14	0.48	1.43	0.35	-0.06	0.29	-0.13	0.39	-0.03
GENE2267X	IMAGE:785707	113048 PRC1 protein regulator of cytokinesis 1 Hs.344037 AA449336	1	0.16	-0.05	-0.96	-0.06	0.16	-0.6	0.41	0.93	0.67	2.15	0.73	0.25	-0.1	0.42	-0.12	1.09	0.31	1.1	-0.09	0.47	0.46	-0.12	0.56	0.11	0.21	-0.28	-0.01	0.56	0.01	0.07	0.21	-0.24	-0.16	-0.24	-0.4	1.78	0.74	0.28	1.13	0.99	1.23	0.42	-0.04	-0.47	-0.12	-0.47
GENE3307X	IMAGE:785701	119005 RAB31 RAB31, member RAS oncogene family Hs.223025 AA449333	1	0.1	-0.11		0.01	0.19	-1.08	0.41		0.56	1.28	-0.2	0.35	-0.46	0.61	-0.67		0.92	0.26	-0.7	-0.37	-0.53	-0.25	0.08	0.24	0.48	0.08	-0.31	0.74	-0.42	-0.19	-0.33	0.17	-0.69	-0.35	0.55	1.75	0.63	0.22	1.32	1.39	1.15	-0.44	-0.24	-0.4	-0.26	-1.71
GENE1137X	IMAGE:120881	106624 RAB31 RAB31, member RAS oncogene family Hs.223025 T96082	1	0.01	0	-1.02	-0.3	0.25	-0.96	0.35	0.98	0.55	1.47	0.18	-0.04	-0.43	0.63	-0.53	0.67	0.43	0.48	-0.24	-0.17	-0.14	0.28	0.27	0	0.16		0.04	0.27	-0.45	-0.33	-0.28	0.18	-0.4	0.02	0.17	1.31	0.32	0.16	0.84	0.71	1.07	-0.26	-0.11	-0.12	-0.33	-1.51
GENE6266X	IMAGE:784150	319055 RAB31 RAB31, member RAS oncogene family Hs.223025 AA432084	1	0.12	0.02	-0.61	-0.2	0.24	-1.08	-0.21	0.79	0.61	1.6		0.14	-0.38	0.75	-0.3	0.56	0.72	0.74	-0.04	-0.12	-0.19	0.05	0.07	-0.07	0.38	-0.23	-0.43	0.58	-0.49	-0.44	-0.08	0.1	-0.63	-0.05	-0.03	0.94	0.31	-0.05	0.56	0.66	0.65	-0.33	-0.35	-0.14	-0.26	-1.83
GENE380X	IMAGE:269815	102234 INHBA inhibin, beta A (activin A, activin AB alpha polypeptide) Hs.727 N27159	1	-0.07	-0.18	-0.5	-0.42	0.75	-1.1	0.41	1.06	1.45	2.14	-0.06	0.77	0.37	0.66	-1.03	1.1	0.63	0	-0.47	-0.6	-0.4	0.88	1.17	-0.01	1.24	0.59	0.52	0.61	0.39	0.48	-0.41	-0.05	-0.67	-0.53	0.32	1.43	1.27	0.55	0.94	1.72	1.34	-0.02	0.6	-0.17	-0.95	-0.38
GENE3081X	IMAGE:202658	117621 TRPS1 trichorhinophalangeal syndrome I Hs.26102 H53479	1	-0.4	0.62	-0.69	-0.7	-0.24	-0.44	-0.07	0.08	0.33	0.42		0.39	-0.27	0.12	-0.5	-0.47	0.15	-0.01		-0.58	-0.25	0.1	0.63	0.3	0.42	-0.36	-0.39	0.43	-0.4	-0.67	-0.3	0.1	-0.61	-0.66	0.42	0.41	0.21	-0.24	-0.06	0.4	1.07	0.19	0.61	0.02	-0.34	-0.11
GENE1800X	IMAGE:197450	110348 CALD1 caldesmon 1 Hs.325474 H51958	1	-0.82	0.67	-1.32	-0.66	-0.41	-0.18	0.01	0.07	0.01	1.19		0.7	-0.4	0.03	-1.39	-0.77	-0.19	-0.45		-0.35	-0.71	0.23	0.95	0.82	0.03	-0.76	-0.42	0.27	-0.79	-0.92	-0.22	0.09	-0.75	-0.3	0.78	0.77	0.59	-0.06	0.23	0.87	1.69	0.02	0.67	0.14	-0.81	-0.25
GENE891X	IMAGE:813628	105176 ESTs Hs.12714 AA447729	1	-0.29	0.99	-0.9	-0.1	0.09	-0.1	0.29	0.04	0.18	1.59	-0.5	1.1	-0.75	-0.22	-1.54	-0.78	-0.3	0.52	-0.62	-0.84	-0.36	0.26	0.41	0.33	0.38	-0.41	-0.48	0.78	-0.36	-0.86	-0.31	0.11	-0.67	-0.12	0.76	0.93	0.32	-0.06	-0.19	1.18	1.77	0.1	0.83	0.55	-0.58	-0.23
GENE5323X	IMAGE:813627	308735 CALD1 caldesmon 1 Hs.325474 AA447737	1	-0.26	0.99	-0.68	-0.12	0.14	-0.35	0.03	0.2	-0.1	1.64	-0.63	1.03	-0.68	-0.23	-1.3	-0.82	-0.49	0.31	-0.27	-0.18	-0.18	0.11	0.3	-0.03	0.54	-0.33	-0.2	0.82	-0.68	-0.86	-0.23	-0.09	-0.79	-0.34	0.5	0.81	0.39	-0.17	-0.17	1.3	1.6	0.3	0.7	0.38	-0.59	-0.3
GENE6072X	IMAGE:758088	316374 CALD1 caldesmon 1 Hs.325474 AA426421	1	-0.38	0.81	-0.45	-0.34	-0.15	-0.16	0.1	0.11	-0.14	1.23	-0.87	0.76	-0.52	-0.33	-1.62	-0.88	-0.54	-0.08	-0.59	-0.52	-0.31	0.09	0.51	0.19	0.53	-0.14		0.65	-0.42	-0.9	-0.25	-0.07	-0.71	-0.28	0.38	0.37	0.31	0.09	-0.1	1	1.36	-0.2	0.43	0.41	-0.46	-0.18
GENE6485X	IMAGE:251685	98823 CDH11 cadherin 11, type 2, OB-cadherin (osteoblast) Hs.75929 H96738	1	0.38		-0.58	-0.16	-0.16	-0.04	0.47	0.49	0.4	0.88	0.27	-0.42	-0.41	0.4	-0.37	0.51	0.23		0.07	-0.01	-0.06	0.59	-0.04	-0.28	0.18	0.17	-0.3	0.35	-0.45	-0.67	-0.16	0.15	-0.64	-0.86	0.39	0.98	0.37	-0.39	0.85	0.91	1.05	0.37	0.38	0.27	-1.07	-0.49
GENE138X	IMAGE:145292	100767 COL4A1 collagen, type IV, alpha 1 Hs.119129 R78225	1	-0.4	0.63	-1.05	0.16	0.25	-0.37	-0.08	-0.35	0.35	1.39		0.51	0.34	0.9	-0.06	0.71	0.05	1.66		0.45	-0.7	-0.29	1	-0.24	0.2	0.58		0.13	-0.19	0.29	0.03	0.11	-0.28	-1.66	0.11	0.52	0.69	-0.69	-0.59	0.65	0.85	0.23	0.34	0.8	-0.24	-0.15
GENE2876X	IMAGE:769959	116510 COL4A2 collagen, type IV, alpha 2 Hs.75617 AA430540	1	-0.33	0.44	-1.33	-0.22	0.01	-0.69	-0.03	0.43	0.4	1.08	0.04	0.23	-0.18	0.44	-0.64	-0.51	0.14	1.52	0.57	0.07	-0.62	-0.26	0.9	-0.18	-0.25	0.1	-0.73	0.12	-0.26	0.23	-0.64	-0.23	-0.56	-1.27	0.08	0.41	0.3	-1.13	-0.61	0.6	0.75	0.1	0.17	0.59	-0.84	-0.45
GENE466X	IMAGE:299272	102652 COL1A2 collagen, type I, alpha 2 Hs.179573 AI822135	1	1.02	0.24	-1.77	0.06	-0.13	-0.8	-0.3	0.38	-0.22	1.24	-0.84	-1.49	0.7	0.27	-2.26	-0.87	-0.11	0.22		-0.82	-1.55	-0.28	1.91	1.41	1.38	0.91	0.1	0.45	-0.38	-0.62	-0.55	0.14	-0.91	-0.78	0.47	0.55	1.42	0.76	0.75	1.39	0.71	-0.29	-0.16	-0.67		-1.12
GENE1116X	IMAGE:502682	106499 ENIGMA enigma (LIM domain protein) Hs.102948 AA125911	1	0.14	0.7		-0.52	-0.73	-0.64	-0.29	0.48	0.43	0.83	-0.25	-1.02	-0.1	-0.11	-1.32	-0.13	0.15		0.66	-0.79	-0.25	0.15	0.39	-0.02	-0.23	0.35	-0.31	0.14	-0.85	-0.43	-0.36	-0.28	-0.78	0.07	0.71	0.79	1.29	0.38	-0.26	1.03	-0.05	-0.84	0.24	-0.31	-0.37	-1.05
GENE22X	IMAGE:767993	100129 PTRF polymerase I and transcript release factor Hs.29759 AA418829	1	0.2	0.18	-0.59	-0.78	-0.79	-0.67	-0.63	-0.26	0.62	0.91	-0.24	0.12	-0.46	-0.34	-0.89	-0.44	-0.35	0.35	-0.19	0.62	0.17	0.03	0.14	0.49	0.01	-0.77	-0.83	-0.03	-0.5	-0.65	-0.54	0.24	-0.93	0.75	0.27	0.38	0.04		-0.1	0.4	0.98	-0.33	0.01	-0.26	1.17	-0.55
GENE3304X	IMAGE:809473	118994 PTRF polymerase I and transcript release factor Hs.29759 AA443119	1	0.4	0.35	-1.38	-0.86	-0.83	-0.99	-1.33	0.32	0.3	0.68	-0.34	-0.07	-0.97	-0.47	-1.22	-0.53	-0.26	0.51	-0.75	0.39	-0.7	0.06		-0.17	-0.12	-0.72	-1.01	-0.16	-0.94	-0.59	-1.62	0.02	-1.32	0.79	0.32	0.31	-0.1	0.6	0.27	0.8	0.58	-0.96	-0.35	-0.88	0.82	-0.33
GENE4891X	IMAGE:431231	226745 EFEMP2 EGF-containing fibulin-like extracellular matrix protein 2 Hs.6059 AA682527	1	0.05	-0.14	-0.73	-0.41	-0.23	-0.3	-0.01	0.21	-0.03	0.27	0.94	-0.63	-0.12	0.05	-1.1		-0.13	-0.49	-0.22	-0.46	0.09	-0.43	0.06	-0.22	-0.21	0.27	-0.18	-0.44	-0.43	-0.63	-0.61	-0.55	-0.69	-0.57	0	0.26	0.36	-0.5	0.14	0.2	0.35	-0.14	-0.1	-0.52	-0.11	-1.03
GENE3383X	IMAGE:263716	119506 COL6A1 collagen, type VI, alpha 1 Hs.108885 H99676	1	1.05	0.84	-0.52	-0.71	-0.32	-0.43	-0.5	-0.37	0.44	0.85	1.2	-0.95		-0.14	-2.15	0.34	-0.27	0.48	-0.3	0.14	-0.35	0	0.12	0.37	0.84	-0.35	-0.45	0.34	-1.86	-1.14	-0.99	-0.37	-0.84	0.19	0.34	0.94	0.8	0.02	0.66	1.1	-0.38	-0.35	-1.02	-0.89	2.02	-1.57
GENE3091X	IMAGE:489089	117706 COL6A1 collagen, type VI, alpha 1 Hs.108885 AA047208	1	1.01	0.84	-0.43	-0.99	0.01	-0.29	-0.81	-0.41	0.3	1.13		-1.04	-0.11	-0.03	-2.15	0.41		0.81		-0.08	-0.77	-0.08	0.07	0.29	0.72	-0.29	-0.69	0.1	-1.75	-1.1	-1.06	-0.14	-0.82	0.34	0.27	0.52	1.01	0.15	0.53	0.95	-0.83	-0.49	-1.08	-1.02	1.88	-1.82
GENE3055X	IMAGE:299539	117476 FGF12B fibroblast growth factor 12B Hs.343809 N71102	1	0.75	0.69	-0.55	-1.15	0.26	-0.51	-0.74	-0.17	0.38			-1	-0.18	0.18	-1.69	0.31	-0.03	0.84		0.01	-0.63	-0.4	0.16	0.2	0.49	-0.45	-0.82	0.29	-1.52	-0.7	-0.77	-0.45	-0.68	0.31	0.33	0.53	0.77	0.35	0.6	1.38	-0.15	-0.4	-1.16	-1.14	1.45	-1.47
GENE1767X	IMAGE:878652	110180 PCOLCE procollagen C-endopeptidase enhancer Hs.202097 AA670200	1	0.31	0.12	-0.79	-0.49	0.33	-1.43	0.02	1	0.12	1.7	0.42	-0.46	-0.08	-0.12	-0.96	0.1	0.16	0.05	-0.42	-0.62	-1.14	-0.52	0.25	-0.34		-0.17	-0.58	0.38	-0.94	-0.32	-0.24	-0.34	-1.04	-1.05	-0.39	0.61	0.77	0.15	0.64	1.44	-0.39	-0.07	-0.91	-1.07	-1.48	-1.41
GENE2097X	IMAGE:285992	112120 ADNP activity-dependent neuroprotector Hs.3657 N67071	1	0.41	0.05	-0.54	-0.54	0.02	-1.24	-0.12	1.22	-0.19	1.34		-0.23	0.1	0.13	-1.63	0.15	0.09	0.04		-0.64	-1.85	-0.63	0.37	0.19	0.33	0.31	-0.39	0.3	-0.89	-0.77	-0.63	-0.21	-1.14	-1.02	-0.52	0.48	0.5	0.05	0.49	0.86	-0.18	-0.25	-0.67	-0.8	-1.08	-1.1
GENE2451X	IMAGE:901655	114147 PCOLCE procollagen C-endopeptidase enhancer Hs.202097 AA513387	1	0.45	0.17	-0.81	-0.45	0.2	-1.16	-0.02		-0.26	1.26	0.39	-0.81	0.25	0.07	-1.65	-0.03	0.1	0.16	-0.89	-0.87	-1.47	-0.35	0.41	-0.22	0.44	0.15	-0.56	0.5	-1.03	-0.57	-0.74	-0.24	-1.36	-1.42	-0.3	0.22	0.93	-0.08	0.77	1.1	-0.46		-0.57	-0.8	-1.15	-1.41
GENE71X	IMAGE:823851	100373 AEBP1 AE binding protein 1 Hs.118397 AA490462	1	-0.02	0.11	-1.31	-0.37	-0.08	-1.48	-0.26	2.3	-0.29	1.54	-0.36	-0.81	-0.17	-0.18	-1.35	0.1	0.63	0.2	-0.79	-0.66	-1.24	-1.1	-0.33	-0.34	0.35	-0.09	-0.66	-0.02	-0.64	-0.73	-0.59	-0.27	-1.35	-1	0.12	0.5	0.92	-0.57	0.86	1.29	-0.21	-0.62	0.13	-0.25	-0.17	-0.88
GENE2507X	IMAGE:80256	114419 **Homo sapiens mRNA; cDNA DKFZp586J021 (from clone DKFZp586J021) Hs.6441 AI820548	1	0.51	0.13	-0.58	-0.91	-0.17	-1.6	-0.47	0.06	0.29	1.67	0.26	-0.58	0	0.04	-1.28	0.2	0.73	0.13	-0.39	-0.1	0.41	-0.36	0.02	-0.25	0.47	0.07	-0.36	0.54	-1.13	-0.98	-1.07	-0.22		-1	-0.02	1.23	1.19	-0.16	0.67	1.27	1.26	-0.12	0.45	-0.52	-1.11	-1.93
GENE5120X	IMAGE:1535416	307457 ESTs Hs.105902 AA917536	1	0.54	-0.07	-0.89	-0.83	0.12	-1.4	-0.67	0.52	-0.06	1.02	0.26	-0.47	-0.28	-0.25	-1.52	-0.12	0.46	-0.01	-0.18	-0.31	0.55	-0.46	0.13	-0.34	0.16	-0.2	-1.01	-0.02	-1.5	-1.23	-1.32	-0.25	-0.93	-1.26	-0.02	1.15	0.98	0	0.7	1.27	0.75	-0.16	0.26	-0.71	-1.33	-1.49
GENE5208X	IMAGE:1534435	308010 Homo sapiens mRNA; cDNA DKFZp586J021 (from clone DKFZp586J021) Hs.6441 AA917374	1	0.62	0.03	-0.88	-0.82	0.17	-1.43	-0.65	0.54	-0.11	1.01	0.11	-0.46	-0.38	-0.3	-1.62	-0.22	0.39	-0.05	-0.34	-0.28	0.5	-0.44	0.03	-0.44	0.15	-0.21	-0.83	0.28	-1.62	-1.33	-1.4	-0.36	-0.9	-1.19	0.01	0.83	1.05	0.07	0.74	1.39	0.88	-0.34	0.26	-0.79	-1.29	-1.66
GENE3907X	IMAGE:878605	221205 MGC3047 hypothetical protein MGC3047 Hs.59384 AA775270	1	0.52	0.03	-0.86	0.08	-0.29	-0.95	-0.28	0.31	1.06	1.2	1.71	-0.94	-0.41	-0.33	-1.34	-0.74	-0.24	0.16	-0.3	-0.73	-0.73		0.17	0.56	0.1	-0.13	-0.52	-0.08	-1.08	-1.1	-1	-0.31	-1.18	-0.8		0.34	0.12	-0.25	0.6	0.96	0.6	-0.38	-0.14	-0.85	-0.99	-1.71
GENE642X	IMAGE:857640	103604 COL6A2 collagen, type VI, alpha 2 Hs.159263 AA633747	1	0.7	0.33	-1.41	-0.53	-0.27	-0.72	0.22	0.46	-0.07	0.81	0.57	-0.95	-0.49	-0.39	-1.58	-0.16	0.04	-0.31	-0.17	-0.58	-0.68	-0.04	-0.01	-0.15	-0.01	-1.02	-0.69	-0.48	-1.21	-0.86	-1.1	-0.47	-1.28	-1.11	-0.2	0.7	0.05	-0.58	0.36	1.05	-0.52	-0.47	-0.71	-1.03	0.2	-1.28
GENE1763X	IMAGE:1030498	110140 MMP2 matrix metalloproteinase 2 (gelatinase A, 72kD gelatinase, 72kD type IV collagenase) Hs.111301 AA555166	1	0.88	1.01		0.04	0.67	-1.28	-0.22	0.33	0.77	2.13	0.33	1.24	0.19	-0.64	-2.8	-0.07	0.66	0.74	0.03	0.16	-0.11	-0.98	0.08	-0.45	-0.11	-0.6	-0.73	0.56	-2.2	-1.6	-0.79	-0.5	-1.67	-1.16	0.4	0.13	0.3	-0.67	1.15	1.32	0.83	-0.6	-0.57	-2.06	-1.01	-2.23
GENE997X	IMAGE:1474174	105753 MMP2 matrix metalloproteinase 2 (gelatinase A, 72kD gelatinase, 72kD type IV collagenase) Hs.111301 AA936799	1	1.21	0.82	-2.56	-0.4	0.83	-0.81	-0.6	-0.85	0	1.23	-0.01	0.46	0.69		-2.61	-0.35	0.27	0.31	-0.45	-0.07	-0.12	-0.09	0.72	0.02	0.51	-0.39		0.59	-1.64	-1.61	-0.26	0.14	-0.97	-0.82	0.61	-0.83	0.35	-0.22	0.54	0.92	0.99	-0.45	-0.44	-1.36	-0.78	-2.2
GENE4239X	IMAGE:23533	223105 LAMA4 laminin, alpha 4 Hs.78672 R38105	1	0.09	0.36	-1.02	0.22	0.16	-0.43	0.26	-0.79	-0.26	0.58	0.27	-0.28	-0.68	-0.16	-1.11	-0.81	-0.26	0.71	0.24	-0.24	-0.78	0.03	0.16	0.18	0.12	-0.14	-0.79	0.31	-0.78	-0.58	-0.54	-0.3	-0.33	-1.3	-0.05	0.22	0	-0.43	-0.07	0.86	0.82	0.3	-0.29	-0.25	-1.22	-1.43
GENE3042X	IMAGE:309826	117396 LAMA4 laminin, alpha 4 Hs.78672 N94616	1	0.23	0.41	-0.77	0.1	-0.04	-0.39	-0.15	-0.75	-0.56	0.79	-0.22	-0.39	-0.71	-0.37	-0.93	-0.86	-0.48	0.52	0.05	-0.31	-0.56		0.2	-0.27	-0.14	-0.08		0.19	-0.95	-0.61	-0.74	-0.1	-0.49	-1.17		0.27	-0.12	-0.18	-0.24	0.77	0.33	0.17	-0.3	-0.35	-1.26	-1.28
GENE4460X	IMAGE:1032831	224335 LOC83468 gycosyltransferase Hs.159993 AA628462	1	0.27	0.19	-0.58		0.08	-0.62	0.08	-0.19	0.21	1.2	-0.29	-0.91	-0.32	-0.53	-1.22	-0.63	-0.16	0.28	0.12	-0.58	-0.47	-0.51	-0.18	-0.09	-0.32	-0.96	-0.19	0.39	-0.58	-0.41	-0.85	0.06	-0.5	-0.84	0.33	0.39	0.31	-0.39	0.75	1.17	-0.27	-0.27	0.07	-0.54	-0.9	-1.13
GENE1228X	IMAGE:784285	107216 Homo sapiens mRNA; cDNA DKFZp564B222 (from clone DKFZp564B222) Hs.100261 AA447503	1	0.2	0.18	-0.37		0.06	-1.17	0.11		0.16	0.51	-0.03	-0.84	-0.22	-0.03	-1.32		0.35	-0.68	-0.2	-0.6	-0.69	-0.35	-0.07	-0.12	0.3	-0.08	-0.26	0.05	-0.38	-0.97	-1.21	-0.5	-0.57	-0.66	-0.35	0.49	0.18	0.11	0.33	0.45	0.45	-0.3	-0.28	-0.32	-0.47	0.44
GENE181X	IMAGE:503839	101059 FLJ20831 hypothetical protein FLJ20831 Hs.318522 AA131537	1	0.23	0.29	-0.85	-0.25	0.05	-0.14	-0.55	1.15	0.17	1.38	0.01	-0.88	-0.14	-0.6	-1.16	-0.78	-0.28	0.59	0.02	-0.44	-0.26	-0.03	-0.31	0.08	-0.1	0.27	-0.62	0.42	-0.83	-0.63	-0.27	-0.3	-0.24	-0.83	-0.16	0.14	0.25	-0.41	0.42	0.58	0.05	0.13	-0.48	-0.2	-0.75	-0.25
GENE1932X	IMAGE:756372	111147 RARRES2 retinoic acid receptor responder (tazarotene induced) 2 Hs.37682 AA481944	1	0.52	-0.09	-0.92	0.4	0.49	-0.82	0.66	0.74	-0.28	1.22	0.51	-0.68	0.01	-0.74	-1.7	-0.27	0.15	0.26	-0.09	-0.74	-0.94	-1.26	0.82	0.02	-0.22	-0.16	-1.02	-0.53	-1.09	-1.7	-1.15	-0.92	-0.88	-0.95	-0.24	0.06	0.43	0.14	0.22	0.95	-0.14	-0.21	-0.47	-0.82	-1.06	-1.67
GENE6592X	IMAGE:1457425	99425 ESTs Hs.135742 AA922939	1	0.47	0.09	-1.26	0.13	0.33	0.5	0.38	-0.34	0.02	1.21	-0.33	-0.02	-0.07	0	-1.45	-0.89	-0.03	-1.15	-1.64	-0.88	-0.61	-0.23	0.68	0.3	0.69	0.09	0.04	0.31	-0.24	-0.13	-0.28	0.13	-0.67	-0.47	0.62	0.33	0.78	0.41	0.76	1.42	0.89	-0.43	0.45	-0.17	0.2	-0.22
GENE4741X	IMAGE:147826	226007 ESTs Hs.171965 R81486	1	0.47	0.43	-1.26	-0.49	0.42	-1.04	-0.94	1.1	0.36	2.06	-0.2	-0.82	0.29	0.46	-1.51	0.7	0.47	1.25	0.43	-0.52	-2.49	-0.2	0.82	0.1	1.02	0.95	0.02	-0.39	0.06	0.18	-0.67	-0.29	-0.42	-0.62	-0.03	1.5	0.61	0	1.35	2.06	-0.3	-0.19	-0.65	-0.84	-1.36	-0.78
GENE2506X	IMAGE:882506	114413 LOXL2 lysyl oxidase-like 2 Hs.83354 AA676458	1	0.78	0.43	-0.87	-0.47	-0.02	-0.96	0.12	-0.57	0.37	1.4	0.3	0.15	-0.4	-0.19	-1.04	0.37	-0.21	1.96	0.5	0.21	-0.82	-0.01	0.94	0.38	0.83	0.92	-0.28	0.4	-0.51	-0.06	-0.28	0.54	-0.52	-1.02	0.04	1.28	0.34	0.1	0.33	1.61	0.63	0.2	-0.27	-0.53	-0.91	-0.98
GENE2744X	IMAGE:357278	115793 WNT5A wingless-type MMTV integration site family, member 5A Hs.152213 W93592	1	0.26	0.15	-0.64	0.07	0.39	1.93	0.58	-1.03	0.68	1.63	0.04	-0.27	-0.61	-1.02	-1.4	-0.43	-0.25	1.44	0.83	0.29	-0.73	-0.31	0.74	0.65	0.28	-0.7	-0.59	0.67	-0.61	-0.31	0.02	0.16	-0.12	-0.96	0.01	1.3	-0.04	0.51	0.18	0.85	1	0.21	0.81	-1.11	-1.28	-1.66
GENE4514X	IMAGE:453195	224656 ANGPTL2 angiopoietin-like 2 Hs.8025 AA704833	1	0.88	0.57	-1.58	-0.54	0.38	-0.97	-0.47	-1.01		0.72	-1.26	-0.65	-0.8	-0.6	-0.83	-0.22	-0.39	0.74	-0.6	-0.57	-0.6	0.19	0.09	0.29	0.85	0.11	-0.39	0.19	-1.29	-1.02	-0.36	0.19	-1	-0.21	0.39	1.4	1.28	0.12	1.41	1.36	1.15	-0.83	-0.46	-1.38	-0.05	-1.87
GENE6654X	IMAGE:263013	99834 PLOD2 procollagen-lysine, 2-oxoglutarate 5-dioxygenase (lysine hydroxylase) 2 Hs.41270 H99816	1	0	-0.06	-2.16	0.41	0.14	-0.24	0.18	0.57	0.61	1.25	-0.42	0.2	0.35	0.08	-2.1	-0.69	-0.39	1.81	0.26	-1.12	-1.53	-0.04	0.72	-0.04	0.8	0.17	-0.07	1.04	-1.12	-1.04	-1.04	-0.26	1.13	-1.46	0.24	1.83	1.31	0.35	0.45	1.14	1.06	-0.15	-0.22	-0.96	-0.44	-1.46
GENE2105X	IMAGE:306300	112198 Homo sapiens, Similar to RIKEN cDNA 0610011N22 gene, clone MGC:21397 IMAGE:3852440, mRNA, complete cds Hs.294145 N90608	1	-0.29	-0.33			-0.05	-0.35	-0.04			1.27	0.03	0.38	0.27	0.17	-1.89		-0.19	1.2	-0.11	-1.04	-0.83	-0.16	0.28	0.11	0.6	-0.39	-0.31	0.68	0.82	-0.15	-0.21	-0.09	0.74	-0.13	0.26	1.11	0.79	0.18	-0.08	0.71	0.26	-0.38	-0.02	-0.21	-0.49	-1.27
GENE4090X	IMAGE:773558	222278 HTRA3 serine protease HTRA3 Hs.60440 AA428183	1	1.2	-0.18		0.54	0.12	-0.93	0.03	-1.55	0.88	0.84	-2.21	-0.94	-1.32	-0.22	-2.65	0.01	0.63	0.48	-0.96	-0.71	-1.43	-0.07	0.45	0.83	0.83	1.52	-0.27	0.89	-1.3	-0.69	-0.04	1.12	-0.58	-0.78	0.54	1.22	0.99	0.2	1.65	1.46	1.11	0.49	-0.2		-1.7	-1.12
GENE2315X	IMAGE:770462	113308 CPZ carboxypeptidase Z Hs.78068 AA427724	1	0.23	0.14	-0.88	-0.3	0.53	-0.01	-0.47		-0.47	0.78	-0.49	-1.15	-0.48	-0.72	-1.77		-0.22	0.6	-0.51	-0.59	-0.68	-0.51		-0.55	-0.53	-0.38	-0.78		-0.75	-0.41	-0.08	-0.6	-0.84	-0.44	0.49	-0.15	0.06	-0.62	0.89	0.16	1.18	-0.43	-0.22	-0.81	0.53	1.67
GENE771X	IMAGE:785744	104369 MFGE8 **milk fat globule-EGF factor 8 protein Hs.3745 AA448941	1	0.26		-0.97	-0.44	-0.33	-1	-0.37	0.42	0.6	1.26	0.28	0.03	-0.01	-0.2	-0.79	0.59	-0.1	0.43	-0.06	0.25	-0.7	-0.2	0.03	0.31	0.25	-0.21	-0.23	0.26	-0.84	-0.71	-0.55	-0.14	-0.63	-0.99	-0.12	0.8	-0.07	0.02	-0.01	0.69	0.86	-0.88	0.05	-0.26	1.34	-1.92
GENE2436X	IMAGE:839101	114016 GJA1 gap junction protein, alpha 1, 43kD (connexin 43) Hs.74471 AA487623	1	-0.07	0.08	-0.22	-0.09	-0.12	-0.27	-0.33	0.14	-0.12	0.75	0.32	-0.07	0.04	0.59	-0.03	-0.1	-0.13	0.39	0.43	0.99	-0.01	-0.15	0.15	0.32	0.53	0.73	-0.6	0.09	-0.48	-0.77	-0.9	-0.35	-0.08	-1.05	-0.24	0.42	0.06	0.06	0.07	0.8	-0.04	-0.19	-0.23	0.11	0.23	1.6
GENE5358X	IMAGE:1841906	309044 TWIST twist homolog (acrocephalosyndactyly 3; Saethre-Chotzen syndrome) (Drosophila) Hs.66744 AI220198	1	0.61	0.22	-0.16	0.56	0.49	-0.64	0.31		0.63	0.51	-0.18	-0.41	-0.07	-0.1	-0.9	0.2	0.36	-0.28	-1.98	-0.03	-0.17	0.36	0.1	-0.21	0.87	-0.46	0.56	0.4	-0.9	-0.08	-0.7	0.57	-1.2	-1.28			0.86	0.36	0.98	1.03	-0.09	0.46	0.11	-0.65	-0.54	-1.41
GENE2792X	IMAGE:754358	116081 SPOCK sparc/osteonectin, cwcv and kazal-like domains proteoglycan (testican) Hs.93029 AA436142	1	0.27	-0.27	-0.15	0.24	-0.35	-0.69	-0.33	0.08	-0.91	0.36	1	0.5	0.2	0.25	-1.39	-1.15	-0.28	-0.55	0.4	-0.72	-0.36	0.25	0.38	0.46	0.78	0.7		0.95	0.23	-0.12	-0.85	0.28	-1.06	-0.36	0.43	0.43	0.17	0.25	0.73	1.1	0.76	-0.82	-0.16	-0.62	-0.72	-1.34
GENE6192X	IMAGE:742041	318095 CALD1 caldesmon 1 Hs.325474 AA402898	1	-0.06	0.71	-0.99	0.36	-0.11	-1.13	-0.21		0.21		-0.05	-0.57		-0.05	-1.08		-0.24	0.08		-0.65	-0.76	0.21	0.35	0.35	0.59	-0.76	-0.24	0.02	-0.16	-0.92	-1.14	-0.72	-0.58	-0.36	0.24		0.29	-0.17	0	0.69	0.32	-0.32	0.05	-0.22	0.47	-0.23
GENE1123X	IMAGE:795840	106518 CPE carboxypeptidase E Hs.75360 AA461513	1	0.57	0.45		0.47	0.05	-0.3	-0.21		0.5		0.61	0.42	0.2	0.55	-0.46		0.64		0.68	-0.06	-0.29	-0.4	0.05	0.07	0.25	0.4	0.29	0.12	-0.29	-0.27	-0.3	-0.19	-0.57	-0.15	-0.05	0.32	0.17	0.04	0.8	0.49	-0.13		-0.54	-0.06
GENE3782X	IMAGE:452466	220468 NLGN2 neuroligin 2 Hs.26229 AA704802	1	-0.42	-0.23	-0.42	-1.13	-0.22	-0.1	-0.35	1.24	0	0.88	1.64	0.6	-0.37	0.04	-1.37	-0.21	-0.01	-0.41	0.08	0.29	0.02	-1.06	0.25	0.64	-0.07	-0.25	-0.31	0.72	-0.36	0.03	-0.91	-0.27	-0.7	0.08	-0.25	0.18	-0.03	0.67	0.03	0.74	0.15	-0.77	-0.59	-0.37	-0.14	-0.73
GENE5221X	IMAGE:510729	308094 PTPN21 protein tyrosine phosphatase, non-receptor type 21 Hs.155693 AA099627	1	0.46	0.32	-1.3	0.65	-0.08	-1.02	0.16	1.08	0.12	0.27		-0.23	-0.25	0.19	-1.08	-0.36	0.21	0.73	0.43	-1.03	-0.14	-0.14	0.67	-0.39	0.13	0.62	-0.64	0.43	-1.04	-0.79	-0.94	-0.88	-0.89	-0.98	0.96	0.1	0.25	-0.44	0.57	0.8	-0.54	-0.61	0.01	-0.66	-0.69	-1.18
GENE3675X	IMAGE:754106	178285 TIMP3 tissue inhibitor of metalloproteinase 3 (Sorsby fundus dystrophy, pseudoinflammatory) Hs.245188 AA478662	1	0.5		-1.6	0.53	0.25	-1.23	1.45	1.53		0.34	1.27	-0.63	-0.35	-0.25	-1.51		-0.23	0.73	0.16	-1.7	0.05	-0.33	-0.3	-0.41	0.26	0.12	-1.34	0.38	-2.02	-1.34	-1.41	-0.93	-1.45	-1.4	-0.78	0.25	0.26	-1.52	0.29	0.77	-0.55	-0.49		-0.64	-0.38	-0.86
GENE808X	IMAGE:774181	104656 TIMP3 tissue inhibitor of metalloproteinase 3 (Sorsby fundus dystrophy, pseudoinflammatory) Hs.245188 AA428406	1	0.22	0.17	-1	0.36	-0.22	-1.24	1.4	1.06	0.41	0.45		-0.31	0.13	-0.07	-0.99	-0.3	-0.45	0.7		-0.68	0.35	-0.63	0.35	0.36	0.41	0.53	-0.86	0.98	-1.28	-1.2	-0.95	-0.63	-0.97	-1.14	-0.35	0.04	-0.05	0.07	0.48	0.63	-0.05	-0.38	-0.05	-0.46	-0.2	-0.67
GENE2729X	IMAGE:85840	115707 NNMT nicotinamide N-methyltransferase Hs.76669 T72089	1	0.41	0.3	-1.04	0.04	0.3	-0.24	-0.04	0.25	0.85	0.74	-0.43	-0.86	0.27	-0.13	-2.07	-0.38	0.01	-0.06	-0.52	-0.79	-0.73	-0.81	0.41	-0.55	-0.47	-0.69	-1.17	-0.99	-1.25	-1.34	-0.83	0.32	-1.55	-1.57	-0.34	1.38	0.6	1.1	-0.14	0.61	-0.58	-1.09	-0.8	-0.14	-0.58	-1.01
GENE6669X	IMAGE:123926	99904 CTSK cathepsin K (pycnodysostosis) Hs.83942 R00859	1	0.95		-1.11	1.49	0.07	-0.88	0.12	0.84	0.78	2.12		-0.66	-0.5	0.39	-1.05	1.15	0.29	0.46	-0.52	-0.02	-0.75	-0.89	-0.46	-0.29	0.2	-0.01	-0.01	-0.42	-0.55	-1.15	0.57	0.52	0.43	-0.36	-0.09	0.34	-0.19	-0.22	0.93	0.36	1.35	-0.25	-0.02	-0.43	-0.34	-1.71
GENE3342X	IMAGE:41208	119205 BMP1 bone morphogenetic protein 1 Hs.1274 R56773	1	0.27	0.35	-0.18	-0.35	-0.55	-0.64	0.68	-0.68	0.35	1.54	0.11	0.26	-0.28	0.08	-0.45	0.82	-0.1	0.36	0.17	-0.25	-0.98	-0.55	0.16		0.24	-0.24	-0.24	0.44	0.01	-0.21	-0.34	0.34	0.1	0.75	0.44		0.54	0.58	-0.02	0.31	0.12	0.08	1.25	0.03	0.51	-1.57
GENE3327X	IMAGE:810224	119111 DKFZp564I1922 adlican Hs.72157 AA464691	1	0.63	-0.19	-0.71	-0.4	0.13	-1.27	0.18	0.29	-0.34	0.9	-0.79	-1.26	-0.66	-0.51	-1.44	0.38	-0.44	1.49	-0.16	0.56	0.76	-0.72	0.83	-0.96	0.41	0.22	-0.24	-0.37	-0.84	-0.84	1.27	-0.01	0.45	-1.12	0.36	0.43	0.73	0.47	2.03	1.05	0.6	-0.07	0.04	-0.97	-1.35	-2.16
GENE101X	IMAGE:796839	100530 PDGFRL **platelet-derived growth factor receptor-like Hs.170040 AA461197	1	0.55	0.27	0.65	-0.59	0.15	-0.45	-0.33	-0.06	-0.65	0.32		-0.75	0.61	-0.22	-1.48		-0.03			0.51	-0.15	0.1	0.2	-0.13	0.22	-0.09	0.07	0.09	-0.9	-0.98	-1.41	-0.16	-0.82	-0.99	0.26		0.51	-0.08	0.21	1	-0.94	-0.6	-0.51	-0.88	-0.18	0.86
GENE1097X	IMAGE:207107	106365 **ESTs, Weakly similar to I38022 hypothetical protein [H.sapiens] Hs.128783 H48508	1	-0.5	0.69	-1.27	-1.17	0.1	-0.89	-0.54	0.74	0.07			0.26	-0.83	-0.23	-0.81	-0.98	-0.08	0.04	-0.39	0.02	-0.62	0.77		0.09	-0.5	-1.06	-1.11	0.54	-1.49	-0.11	-0.63	-0.18	-0.38	-0.46	0.43		0.39	-0.16	0.62		1.09	-0.05		-0.53	0.14	-0.41
GENE4262X	IMAGE:453602	223260 Homo sapiens cDNA FLJ11629 fis, clone HEMBA1004241 Hs.209209 AA679571	1	-0.11	0.53		-0.88	0.21	-0.53	0.26	1.07		0.63		0.31	-0.06	0.18			0.27		0.27	0.06	-0.61	-0.7	0.76	0.08	0.34	-0.63	-0.53	0.14	-0.8	0.06	-0.12	-0.33	-0.47	-0.24	0.16	0.58	0.47	-0.42	0.46	0.28	0.19	0.05	0.63	-0.21	0	-0.32
GENE2614X	IMAGE:365826	115019 GAS1 growth arrest-specific 1 Hs.65029 AA025819	1	0.05		-0.09	0.01	-0.03	-1.08	0.67	-0.19	-0.17	1.08		-0.95	0.38	-0.02	-1.19	1.51	-0.17	-0.91	-1.62	-0.69	-0.88	-0.49	0.72	0.15	1.1	0.69	0.21	-0.5	-0.75	-1.24	-0.76	0.23	-1.4	-1.09	1.09	1.37	0.97	0.7	0.39	1.25	0.34	-0.94	-0.35	0.06	0.61	-1.08
GENE4278X	IMAGE:897159	223357 FLJ10374 hypothetical protein FLJ10374 Hs.21811 AA676962	1	0.66	0.81	-0.25	-0.24	0.33	-0.24	-0.02	-0.37	0.51		-0.01	-0.6	-0.02	-0.32	-0.09	0.45	0.05	0.45	-0.81	0.2		0.04	0.52	-0.38	0.34	0.08	0.18	0.84	0.05	-0.53	-0.19	0.42	-0.37	-0.4	0.72	0.97	0.48	-0.36	-0.52	0.63	1.27	0.23	0.49	1.22	-0.15	-0.52
GENE2361X	IMAGE:810512	113595 THBS1 thrombospondin 1 Hs.87409 AA464532	1	0.33	0.59	-0.76	-0.96	-0.25	-0.65	0.48	-0.83	0.35	0.99	-0.01	0.12	0.33	-0.49	-0.81	0.4	-0.66	-0.77	-0.45	0.31	0.9	0.71	0.82	-0.77	0.58	0.02		1.03	0.14	-0.56	-0.41	0.28	-0.44	-0.94	0.78	1.2	0.72	-0.61	-0.06	0.83	1.81	0.11	0.53	1.42	-0.12	-0.39
GENE253X	IMAGE:491692	101498 COL4A1 collagen, type IV, alpha 1 Hs.119129 AA150402	1	-0.42	0.64	-0.29	0.05	-0.22	0.15	0.48	-1.25	0.01	0.23	0.31	-0.04	0.02	0.48	0.26	0.31	-0.38	0.24	0.22	0.7	-0.27	0.47	0.76	-0.22	0.44	-0.09	-0.38	-0.03	-0.02	0.18	0.51	0.42	0.33	-1.14	0.07	0.52	0.48	-0.77	-0.03	0.27	1.29	0.61	0.65	0.95	0.16	0.09
GENE1467X	IMAGE:813254	108485 F2R coagulation factor II (thrombin) receptor Hs.128087 AA455910	1	0.51	-0.36	-0.49	0.38	0.34	-0.1	-0.17		-0.14	0.28		0.09	-0.7	-0.07	-0.31		0.05	0.58	0.17	0.11	-0.43		-0.7	-0.89	-0.11	-1.03	-0.8	0.42	-0.17	-0.35	0.34	-0.7	-0.03	-0.91	-0.64	1.08	-0.11	-0.74	0.57	0.34	1.03	1.13	0.25	0.13	-0.75	0.17
GENE4105X	IMAGE:264692	222380 SRP14 signal recognition particle 14kD (homologous Alu RNA binding protein) Hs.180394 N20406	1	0.41		-0.74	0.33	0.38	-0.34		-1.02	-0.12	0.62	0.62	0.26	-0.69	-0.18	-0.51	-1.44	0.06	0.7	0.26	-0.35	-0.39	-0.71	-0.18	0.26	-0.1	-0.89	-1.42	0.81	-0.32	-0.76	0.03	-0.8	-0.18	-0.82	-0.66	0.92	0.01	0.05	0.55	0.11	0.74	1.06	-0.04	-0.22	-0.89	-0.28
GENE1785X	IMAGE:376574	110269 ESTs Hs.42502 AA041482	1	-0.43		-0.76	0.37	0.01	-0.88	0.57		0.13	-0.3	0.08	0.19	-0.21	-0.69	-1.14		0.33	-0.04	0.05	0.5	-0.57	-0.44	-0.5	0.24	-0.43	-1.25	-0.77	0.27	-0.45	-0.42	0.14	-0.57	0.43	-0.24	-0.45	0.22	-0.65	-0.3	0.01	-0.24	0.56	1.11	0.82	-1.18	-1.18
GENE1331X	IMAGE:416045	107749 MEG3 maternally expressed 3 Hs.112844 W85841	1	0.1	0.07	-0.43	0.24	-0.04	-0.5	-0.07	-0.91	-0.21	0.46		0.13	-0.11	0.05	-0.15		-0.04	-0.47		0.11	-0.24	-0.46	-0.08	0.21	0.17	-0.15	-0.31	-0.08	-0.27	-0.31	-0.35	0.06	-0.25	-0.55	0.05	0.01	-0.19	0.07	-0.14	0.51	0.43	0.41	0.01	0.13	-0.39	-1.12
GENE6004X	IMAGE:785530	315510 ITGA1 integrin, alpha 1 Hs.116774 AA450323	1	-0.49	0.18	-0.96	0.23	-0.33	0.02	0.35			0.46	0.06	0.36	-0.74	0.19	0.72	-1.47	-0.26	0.41	-0.18	-0.67	-0.95	0.1	0.14	-0.3	-0.1	0.47	-0.78	0.27	-0.74	-0.5	0.47	-0.14	-0.01	-0.57	0.48	0.59	0.29	-0.42	-0.55	0.86	1.42	0.42	0.75	0.51	-0.79	-1.05
GENE1528X	IMAGE:23185	108846 HXB hexabrachion (tenascin C, cytotactin) Hs.289114 R39239	1	1.46	1.31	-0.6	-0.97	0.52	-1.3	-0.48	0.37	0.81	0.25	-0.43	0.02	-0.84	-0.64	-1.14	-0.13	-0.97	0.37	0	-1.11	-0.69	1.26	0.43	0.52	0.87	-0.31	-0.42	0.95	-1.76	-1.19	-1.38	0.52	-1.28	-0.23	1	0.93	1.27	0.44	0.28	1.93	0.41	-1.33	-0.82	0.81	1.94	-0.49
GENE2864X	IMAGE:488479	116451 TPM1 tropomyosin 1 (alpha) Hs.77899 AA047403	1	0.3	1.04	-0.69	-0.87	0.32	0.47	-0.57	0.33	0.26			-0.75	-1.14	-0.37	-1.34	-0.47	0.71	0.24		-0.16	-0.02	0.27	0.13	0.11	0	-0.49	-0.29	0.2	-0.65	-0.54	0.37	0.2	-0.52	0.09	0.41	-0.33	0.19	-0.76	-0.53	1.17	1.26	-0.02	0.1	-0.43	-0.89	-1.04
GENE1709X	IMAGE:28218	109844 GABRG2 gamma-aminobutyric acid (GABA) A receptor, gamma 2 Hs.7195 R13309	1	0.31	0.97	-0.35	-1.13	-0.27	-0.05	-0.27	0		0	-0.16	-0.12	-0.51	-0.01	-0.52	-0.78	-0.15	-0.37	0.39	0.1	-0.23	0.01	0.05	0.23	0.15	-0.2	0.01	0.07	-0.48	-0.44	-0.02	-0.2	-0.54	0.66	0.6	0.45	-0.22	0.02		0.97	0.22	-0.53	0.02	-0.46	-0.65	-0.98
GENE2994X	IMAGE:81289	117110 ACTG2 actin, gamma 2, smooth muscle, enteric Hs.78045 T60048	1	0.37	1.15	-0.5	-1.59	-0.71	-0.01	-0.75	0.45	0.69	0.55	-0.36	-0.55	-0.83	-0.18	-0.88	-0.16	0.2	-0.19	-0.04	0.43	0.07	0.07	-0.83	-0.05	0.13	0.07	0.07	0.33	-0.22	-0.48	-0.28	-0.26	-0.88	1.11	0.74	0.59	-0.34		-0.12	1.22	1.18	-0.5	0.1	-0.53	-0.43	-0.95
GENE3235X	IMAGE:302933	118614 FLJ22678 **hypothetical protein FLJ22678 Hs.7718 N90109	1	0.14	0.52	-0.06	-0.85	-0.54	0.04	-0.61	0.72		0.83	0.3	-0.18	-0.4	0.15	-0.53	0.48	0.44	0.23	0.22	0.55	0.24	-0.23	-0.65	0.03	0.19	0.18	0.37	0.12	0.04	0.08	0.47	0	-0.38	0.65	0.34	0.56	0.1	-0.16	-0.32	0.58	0.79	-0.3	0.28	0	0.04	-0.2
GENE4122X	IMAGE:447787	222487 ALDH1B1 aldehyde dehydrogenase 1 family, member B1 Hs.169517 AA702358	1	0.94	0.97	-0.09	-1.61	0.53	0.13	-0.02	0.16	1.49	1.97	0.45	0.31	-0.09	0.68	-0.1	0.57	0.31	0.71	0.04	-0.3	0.42	1.59	-1.11	-0.24	0.41	1.12	0.04	0.12	-0.52	0.37	-0.32	0.46	-0.17	0.7	-0.26	0.13	-0.33	-0.25	0.16		0.11	-0.75	-0.02	-0.49	-0.75	0.55
GENE2183X	IMAGE:198982	112603 DNMT2 DNA (cytosine-5-)-methyltransferase 2 Hs.97681 R95731	1	0.74	0.73	0.02	-1.27	0.01	-0.19	-0.59	-0.17	1.34	1.61	0.3	0.05	-0.18	0.48	-0.25		-0.07	0.87	-0.29	0.11	0.28	2.09	-0.28	0.04	0.48	1.03	0.34	0.46	-0.09	-0.26	0.14	0.34	-0.02	0.34	0.35	0.07	-0.33	-0.35	-0.14	0.58	0.54	-0.33	-0.08	-0.47	0.11	0.42
GENE5034X	IMAGE:1535286	306972 ALDH1B1 aldehyde dehydrogenase 1 family, member B1 Hs.169517 AA918490	1	0.62	0.64		-1.31	0.23	0.3	-0.76	0.25	1.26	1.28	0.19	-0.14	-0.1	0.76	-0.11	0.79	0.21	0.02	-0.89	-0.05	0.4	2.26	-0.27	-0.06	0.62	1	0.15	0.24	0.24	-0.21	0.1	0.4	0.17	0.57	0.34	-0.57	-0.45	-0.43	-0.09	0.49	0.05	-0.19	0.12	-0.34	-0.2	0.43
GENE5483X	IMAGE:768936	309868 Homo sapiens cDNA FLJ32960 fis, clone TESTI2008240 Hs.352556 AA425780	1	0.04	0.33	-0.99		-0.16	-0.82	-0.84		0.14	1.34	-0.77	-1.33	-0.33	-0.13	-0.72		-0.21	-0.19	-0.37	-0.41		0.19		-0.5	0.15	-0.88	-0.73	0.16	-0.63	-0.55	-0.74	0.2	-0.35	-0.66	0.73	-0.67	0.7	-0.45	0.59	1.27	0.08	-0.41	0.05	-0.22	-0.73	-0.9
GENE4992X	IMAGE:154753	245954	1	1.01	0.79	-0.47	0.18	-0.32	-0.33	0.46		-0.63	1.01	0.03	-1.17	-0.36	-0.36	-1.05	0.06	0		-0.12	0.08	0.04	0.01	0	-0.41	0.55	-1	-0.33	0.98	-0.41	-0.47	0.09	0.36	-0.23	0.09			-0.06	-0.27	0.23	0.17	1.27	-0.04	0.18	-0.37	-0.23
GENE772X	IMAGE:488207	104377 T1A-2 lung type-I cell membrane-associated glycoprotein Hs.135150 AA046430	1	0.45	0.46	-0.5	0.03	0.32	-0.34	-0.18	0.3	0.55		-0.76	-0.31	-0.25	-0.29	-1.24	0.56	-0.13	0.01	0.2	-0.02	-0.23	-0.46	-0.12	0	0.12	-0.15	-0.3	0.66	-0.74	-0.38		-0.13	-0.37	-0.73	0.14	0.09	0.34	0.06	0.94		0.45	-0.35	-0.41	-0.42	1.02	-0.85
GENE365X	IMAGE:263815	102159 **Homo sapiens, clone IMAGE:4243767, mRNA Hs.6630 H99761	1	0.91	0.76	-0.78	0.79	-0.01	-0.72	-1.35	-0.37	0.56	0.4		1.24	-0.83	-0.55	-1.48	-1	0.11	-0.08		-0.42	0.51	-0.09	0.42	1.13	0.25	0.17		1.03	1.36	0.01	-0.4	0.53	0.22	-0.26	1.04	-0.7	0.74	-0.44	0.4	-0.41	0.24	-0.64	-0.21	-0.28	-0.88	-1.88
GENE1704X	IMAGE:487371	109815 Homo sapiens cDNA FLJ32424 fis, clone SKMUS2000954, moderately similar to Homo sapiens F-box protein Fbx25 (FBX25) mRNA Hs.61661 AA046488	1	0.26	-0.11	-0.56	0.59	0.8	-0.96	-0.36	-0.32	0.98	1.17	-0.72	1.57	-0.5	-0.4	-0.97		0.27	0.21	-0.55	-0.35	0.1	0.02	0.24	0.28	0.04	0.09	0.05	0.48	1.74	1.53	-0.21	0.9	0.54	-0.12	0.83	0.21	0.02	-0.34	0.15	0.49	0.69	-0.39	0.36	-0.35	-0.66	-1.69
GENE836X	IMAGE:293339	104832 SLUG slug homolog, zinc finger protein (chicken) Hs.93005 N64741	1	-0.34	0.45	0.11	-0.1	0.44	-0.65	-0.1	-0.72	-0.9	0.69	0.44	0.34	0.11	0.29	-1.11	-0.24	-0.42	0.01	-0.73	-0.2	-0.86	0.62	1.1	-0.05	0.42	-0.2	-0.27	0.57	0.17	0.22	-0.3	0.38	-0.09	-0.71	-0.16	1.58	1.85	0.33	0.81	1.07	0.18	0.16	-1.28	-0.39	0.83	-1.51
GENE3188X	IMAGE:486591	118286 SEMA3C sema domain, immunoglobulin domain (Ig), short basic domain, secreted, (semaphorin) 3C Hs.171921 AA042990	1	0.01	-0.38	-1.24	0.9	-0.61	-0.18	0.49	0.44	-0.21	0.44	1.44	0.17	-0.32	-0.56	-0.17	-1.2	0.28	-0.32	-0.26	-0.46	-0.34	0.06	0.08	-0.05	0.98	0.18	-0.19	0.22	-0.62	-0.68	-0.4	0.62	-0.31	0.98	0.88	-0.08	1.94	0.42	0.42	1.26	1.08	0.31	1.45	-0.35	-1.13	-1.74
GENE2011X	IMAGE:357031	111702 TNFAIP6 tumor necrosis factor, alpha-induced protein 6 Hs.29352 W92764	1	-0.16	0.41	-0.61	0.47	0.52	-0.19	1.31	0.37	0.48	0.5		0.2	-0.16	0.19	-0.75	0.94	-0.01	0.56	-0.33	-0.26	-0.33	-0.1	-0.06	-0.12	0.04	-0.34	-0.16	0.11	-0.02	-0.22	0.01	0.86	-0.54	-1.15	1.15	1.78	0.66	0.59	0.51	0.83	0.02	-0.56	-0.01	-0.36	-0.65	-1
GENE1925X	IMAGE:134783	111093 COL11A1 collagen, type XI, alpha 1 Hs.82772 R31701	1	-0.35		-0.77	0.01	0.17	-0.53	1.66	1.58	-0.09	1.23	-0.81	-0.33	0.2	0.47	-1.11	0.84	0.48	0.41	-0.27		-0.8	-0.34	0.9	-0.15	0.63	1.23	0.73	0.25	-0.23	-0.4	-0.24	1.03	-0.64	-0.76	0.37	1.54	1.21	1.17	1.65	1.19	0.85	-1.01	-0.01	-0.76	-0.41	-0.59
GENE3444X	IMAGE:796711	119896 COL11A1 collagen, type XI, alpha 1 Hs.82772 AA460702	1	0.23	-0.29	0.18	0.12	-0.12	-0.29	1.18	0.78	-0.25	0.62		-0.22	-0.37	-0.16	-1.08	0.1	0.19	0.68	0	-0.24	-0.26	-0.66	0.55	-0.39	0.07	0.4	-0.09	-0.32	-0.02	-0.18	-0.25	0.5	-0.83	-0.28	0.27	0.09	0.59	0.03	0.59	1.45	0.72	-0.53	0.43			-0.88
GENE2770X	IMAGE:813707	115991 RGS16 regulator of G-protein signalling 16 Hs.183601 AA453774	1	0.07	-0.39	-0.23	-0.43	-0.35	-0.84	0.67	1.28	0.79	1.28	-0.9	0.19	0.7	0.36	-1.54	-0.31	0.2	-0.6	-0.5	-0.62	-1.07	-0.92	0.76	-0.84		0.84	0.51	-0.16	-0.97	-0.92	-0.55	-0.17	0.04	-0.51	0.7	1.15	0.68	-0.34	1.34	1.49	1.16	-0.58	0.88	1.22	0.17	0.64
GENE5037X	IMAGE:565083	306982 RGS16 regulator of G-protein signalling 16 Hs.183601 AA128457	1	0.02	0.22	0.2	-0.94	-0.45	-0.77	1	1.29	0.8	1.04		0.22	-0.04	-0.16	-0.73		0.43			-0.59	-1	-0.11	-0.44	-0.99	0.06	-0.29	-0.65	-0.3	-0.94	-0.6	-0.89	-0.62	-0.38	-0.66	0.72	1.2	0.77	-0.96	0.29	1.3	0.48	-0.57	0.08	0.83	0.47	0.87
GENE749X	IMAGE:854079	104265 ACTN1 actinin, alpha 1 Hs.119000 AA669042	1	0.09	0.36			-0.59	-0.65	-1.02		0.87	1.39	0.23	0.3	-0.07	0.46	-0.23	1.51	0.55		0.06	0.09	0.14	1.07	0.37	-0.37	0.36	-0.24	-0.37	1.13	-0.9	-0.63	-0.56	-0.19	-0.66	0.54	0.42	0.39	0.44	0.04	-0.03	0.28	0.65		0.2	0.43
GENE2654X	IMAGE:284497	115243 Homo sapiens mRNA; cDNA DKFZp586E1624 (from clone DKFZp586E1624) Hs.94030 N52362	1	0.09	-0.39	-0.22	0	-0.06	-0.84	0.61	-0.56			-0.07	0.05	0.18	0.7	-0.9	-0.87	0.33	0.31	0.39	-0.82	0.14	-0.08	0.48		0.03		-0.45	-0.07	-0.62	-0.37	-0.68	-0.52	-0.7	-0.56	-0.14	1.18	3.2	0.79	0.74	0.01	-0.15	-0.07	0.68	-0.14	0.57	0.88
GENE5434X	IMAGE:1551030	309527 CDA cytidine deaminase Hs.72924 AA922903	1	-0.34	-0.82		-0.47	-0.76	-0.51	-0.2		0.16	3.71	-1.08	0.96	-0.94	-1.37	-0.95	3.49	0.59	0.38		0.14	-0.63	-0.25	0.48	-0.47	-1.32	0.28	0.52	-0.75	0.33	0.61	-0.13	-0.87	0.73	-0.9	-0.69	1.37	4.67	1.46	-0.37	1.85	0.79	2.18	1.67	0.58	-0.94	-1.42
GENE2652X	IMAGE:809784	115237 KLK6 kallikrein 6 (neurosin, zyme) Hs.79361 AA454743	1	0.14	-0.14	-0.36	-1.18	-0.75	-0.45	0.07	2.17	2	3.92	1.81	1.14	1.34	-0.32	-1.69	6.07	0.72	2.26	1.84	-0.42	0.31	1.87	0.08	0.16	-0.09	1.07	-0.07	0.78	0.13	-0.09	0.41	-1.14	0.41	-1.55	2.95	0.11	3.11	1.66	-0.55	2.67	-0.95	-0.56	0.62	-0.03	-1.11	-2.47
GENE4738X	IMAGE:453589	225990 SLC2A1 solute carrier family 2 (facilitated glucose transporter), member 1 Hs.169902 AA679565	1	-0.22	0.91	0.13	-1.01	-0.68	-0.26	0.9	2.17	1.85	2.37	0.69	1.07	0.07	-0.5	-1.66	1.28	0.66	2.94	0.3	0.22	-0.42	0.43	2.44	0.25	-0.42	2.55	1.04	0.38	-1.14	-0.93	0.47	0.11	-0.01	-0.17	1.13	2.73	3.03	0.3	-0.13	1.28	-0.17	0.44	1.18	0.53	-0.99	-0.95
GENE4121X	IMAGE:25389	222483 SLC2A1 solute carrier family 2 (facilitated glucose transporter), member 1 Hs.169902 R11688	1	-0.23	1.26	0.32	-0.8	-0.65	-0.23	0.26	2.48	2.84	3.23	1.38	1.09	0.03	-0.34	-1.72	2.04	0.99	3.01	0.26	0.41	-0.54	0.77	1.95	0.13	-0.27	2.6	1.08	0.44	-0.85	-0.59	0.63	0.25	0.53	0.37	1.3	3.37	3.56	0.31	-0.63	1.31	1	0.65	1.32	0.74	-0.8	-0.85
GENE464X	IMAGE:207358	102645 SLC2A1 solute carrier family 2 (facilitated glucose transporter), member 1 Hs.169902 H58872	1	-0.19	0.91	0	-0.73	-0.26	-0.5	0.08	2.38	2.5	3.33	1.42	1.02	-0.04	-0.76	-1.77	1.69	0.76	3.25	0.41	0.36	-0.3	0.45	1.84	-0.3	-0.02	2.41	1.01	0.09	-0.93	-0.2	0.8	-0.38	0.29	0.08	1.09	3.12	3.47	0.23	-0.72	1.59	0.87	0.88	1.29	0.26	-0.73	-0.72
GENE3759X	IMAGE:25315	220329 PPM1B protein phosphatase 1B (formerly 2C), magnesium-dependent, beta isoform Hs.5687 R11895	1	-0.1	0.68	0.06	-0.1	-0.08	-0.34	0.21	1.37	1.6	2.06	0.98	0.78	-0.24	0.6	-0.01	1.39	0.69	1.92	-0.05	0.58	0.1	0.15	0.96	-0.11	-0.3	1.74	0.82	0.31	-0.23	-0.46	0.3	0.04	0.22	-0.12	0.35	1.66	2.21	0.16	-0.6	0.72	0.47	0.45	0.77	0.44	-0.78	-0.61
GENE4508X	IMAGE:25391	224630 Homo sapiens mRNA; cDNA DKFZp761K2024 (from clone DKFZp761K2024) Hs.21415 R11689	1	-0.14	0.35	0.3		-0.93	-0.03	0.05	1.19	1.56		1.01	0.21	0.31	-0.21	-0.81	1.05	0.76	1.3	0.05	0.25	-0.14	0.15	0.57	-0.04	-0.1	1.39	0.6	0.22	-0.3	0.24	0.34	-0.16	0.47	-0.3	0.65	2.17	2.32	0	-0.39	0.66	0.75	0.45	0.61	0.76	-0.05	0.32
GENE3736X	IMAGE:25527	220151 ESTs Hs.269722 R11781	1	-0.22	0.26	-0.32		-0.04	-0.14	0.01	1.61		1.7	0.6	0.55		0.2	-0.36	0.58	0.35	1.71		-0.23	-0.14	0.69	0.4	-0.12	0.08	1.22	0.31	-0.82	-0.46	0.41	-0.04	-0.33	0.33	-0.35	-0.47	1.49	1.49	-0.47	-0.54		-0.13	0	0.24	0.19	-0.84	-0.7
GENE2062X	IMAGE:52222	111924 PLCB2 phospholipase C, beta 2 Hs.251664 H23457	1	0.28	0.05	-0.04	-0.19	-0.58	0.24	1.09	2.72	0.63	2.1		2.73	-0.09	-0.73	-1.1	0.63	0.73	1.06		-0.01	0.8	0.28	-0.37	0.62	-0.49	0.64	0.22	-0.02	-0.2	0.22	-0.45	-0.15	0.01	-0.67	0.39	0.78	1.98	1.2	0.55	0.55	0.23	-0.12	0.92	0.55	-1.73	-0.5
GENE4286X	IMAGE:378365	223403 PIGPC1 p53-induced protein PIGPC1 Hs.303125 AA775509	1	0.42	0.12	-0.11	0.42	-0.44		1.05	2.08	0.83	2.91	1.34	2.76	0.07	-0.93	-1.17	1.07	0.58	1.69	-0.65	-0.18	0.63	0.51	0.04	0.78	0.16	0.65	0.44	0.16	0.32	0.35	-0.35	0.02	0.59	-0.35	0.64	0.57	1.66	1.33	0.41	0.81	0.57	0.17	1.09	0.56	-2.38	0.39
GENE1303X	IMAGE:377275	107602 TRIM29 tripartite motif-containing 29 Hs.82237 AA055485	1	2.74	1.73	-1.47	-0.41	-1.66	1.08	-0.83	0.91		2.89	1.57	-0.26	-2.06	-1.65	-1.14	-0.12	3.1		-1.04	-0.84	0.8	1.77	2.69	2.19	0.49	2.86		-1.26	0.66	1.22	0.59		1	1.67	2.02	1.71	-2.35	3.16	1.53	1.58	1.46	0.42	0.66	0.48	-1.42	-1.79
GENE19X	IMAGE:810960	100104 KLK10 kallikrein 10 Hs.69423 AA459401	1	1.88	1.13		-0.3	-0.49	-1.02	0.02	-0.66	1.32	3.7		-1.07	-1.11	-0.84	-2.18	-0.3	3.04	2.92	1.41		1.59	1.33	0.6	0.72	-0.92	0.42	-0.7	-1.21	-0.16	0.53	2.11	-0.81	-0.61	2.45	3.34	3.23	2.3	3.05	2.08	3.23	1.09	-1.93	1.83	0.31		0.72
GENE2622X	IMAGE:502326	115107 HSPD1 heat shock 60kD protein 1 (chaperonin) Hs.79037 AA156674	1	1.11	1.98	-0.25	-0.48	-1.52	-0.57	-0.19	-0.02	0.7		-0.27	-0.36	-0.59	-0.39	-0.68	0.19	1.9	2.02	0.78	-0.87	0.93	0.4	-0.25	0.61	-0.68	-0.13	-0.31	-0.3	-0.59	-0.31	0.87	-0.6	-0.48	1.22	2.08	2.04	1.05	2.6	0.8	2.05	0.98	-0.77	0.94	-0.05	-0.03	0.55
GENE1556X	IMAGE:246704	108974 RAI RelA-associated inhibitor Hs.324051 N57743	1	-0.25	0.39	-0.03	-1.38	0.24	-0.25	-0.98	0.16	0.91	0.66	0.09	-0.8	-0.13	0.03	-0.74	0.71	0.38	1.2	-0.56	-0.53	0.65	0.36	0.77	0.41	-0.31	-0.04	0	0.75	0.25	0.59	0	0.59	0.33	2.18		0.56	1.37	0.79	-0.2	0.5	0.07	0.56	0.58	0.44	-1.15	-0.52
GENE1068X	IMAGE:511778	106197 TM4SF1 transmembrane 4 superfamily member 1 Hs.351316 AA088439	1	0.26	1.2	-1.38	1.25	0.53	1.65	0.9	-0.35				-0.81	0.72	0.83	-1.37	2.16	1.41	2.11		0.84	-0.03		-1.05	0.53	0.19	0.38	-0.2	1.66	-1.25	-0.36	-0.77	0.52	-0.02	1	1.43	2.61	2.81	-0.89	-2.28	1.86	0.19	-0.4	0.88	0.54	-2.07	-0.47
GENE6182X	IMAGE:1759582	317991 FN14 type I transmembrane protein Fn14 Hs.10086 AI221536	1	0.8	0.26	-0.99	0.27	0.09	-1.17	-0.08	-0.6	1.53	1.79	-0.05	-2.04	0.67	-0.6	-1.83	1.17	0.32	0.9	1.36	0.72	0.05	-0.17	0.17	0.36	0.44	-0.11	-0.75	1.14	-0.13	0.31	0.42	0.78	-0.51	0.51	1.14	0.98	2	1.08	0.63	1.1	0.96	1.6	0.38	0.54	-1.94	0.2
GENE1119X	IMAGE:135791	106504 FN14 type I transmembrane protein Fn14 Hs.10086 R33355	1	0.48	-0.2	-0.43	0.17	-0.23	-0.86	0.15	-0.71	1.08	1.52	-0.16	-0.33	0.66	-0.31	-1.19	1.68	0.37	1.14	0.85	0.56	0.25	-0.57	0.43	0.79	0.48	0.24	-0.33	0.77	0.26	0.08	0.26	0.54	-0.47	0.41	1.1	1.33	1.44	0.99	0.25	0.63	0.93	1.21	0.45	0.33	-1.53	-0.4
GENE3087X	IMAGE:753610	117656 APOE apolipoprotein E Hs.169401 AA478589	1	-0.01	0.4	-0.58	-0.2	-0.28	-0.7		0.53	0.25		-0.69	-0.47	0.09	0.17	-0.52	1.23	0.79	0.64	0.15	-1.04	0.16	-0.56	0.27	0.03	0.37	2.12	-0.26	0.67		0.11	0.34	0.29	-0.3	0.01	0.47	0.95	1.78	1.48	-0.37	0.45	-0.28	-0.37	-0.25	-0.03	-0.13	-0.68
GENE6563X	IMAGE:208718	99254 ANXA1 annexin A1 Hs.78225 H63077	1	0.24	0.58	-1.62	-1.04	0.33	-1.52	1.33	-0.65	-0.19	1.24	-1	-0.77	-1.24	-0.43	-0.26	1.65	0.71	1.46	-0.76	-1.86	0.56	-0.66	0.56	-0.57	0.41	2.91	-0.55	0.9	-0.63	0.04	1.09	0.67	-0.5	0.54	0.82	2.61	2.55	2.49	0.15	1.11	-0.34	-0.1	-0.48	-0.52	-1.55	-1.83
GENE1400X	IMAGE:161992	108102 FER1L3 fer-1-like 3, myoferlin (C. elegans) Hs.234680 H26176	1	0.3	-0.09	-1.62	0.1	0.27	-0.65	1.16	0.82	-0.49	1.35	-1.68	-0.47	-1.11	0.23	0.09	0.94	0.88	1.05	0.13	-1.51	1.58	-0.04		0.59		0.85	0.35	0.1	0.24	0.93	0.84	1.28	-0.59	1.26	1.46	2.05	1.19	0.9	1.03	1.36	0.34	0.21	0.65	-0.26	-2.16	-0.7
GENE5800X	IMAGE:810441	312770 FER1L3 fer-1-like 3, myoferlin (C. elegans) Hs.234680 AA457121	1	0.26	-0.11	-0.82	-0.09	0.36	-0.91	0.76	0.65	-0.52	1.51	-0.79	-0.26	-0.3	0.13	0.07	0.82	1.04	0.66	-0.27	-0.79	1.25	-0.69	0.35	0.64	0.06	0.8	0.42	0.2	0.22	0.44	0.5	1.3	-0.44	0.99	0.93	1.61	1.07	1.19	0.38	1	0.41	0.2	0.74	-0.25	-1.6	-0.72
GENE2367X	IMAGE:460403	113623 LAMC2 laminin, gamma 2 (nicein (100kD), kalinin (105kD), BM600 (100kD), Herlitz junctional epidermolysis bullosa)) Hs.54451 AA677534	1	-0.46	0.55	-0.57	0.08	-0.63	0.53	0.6	0.73	0.52		-1.48	-1.13	-2.1	-1.22	-1.73		1.57		-1.58	-0.03	-0.46	-1.57	-1.13	0.41	0.78	0.59	0.13	-0.46	-0.96	-0.03	-0.13	0.67	-0.95	1.89	1.23	3.03	2.14	1.95	1.29	1.88	0.29	-1.01	0.46	0	-2.51	-1.91
GENE306X	IMAGE:270505	101816 MMP14 matrix metalloproteinase 14 (membrane-inserted) Hs.2399 N33214	1	-0.55	0.17	-0.5	0.73	-0.9	0.68	0.16	0.97		0.61	-0.4	-1.33	-0.63	-0.82	-1.53	2.02	0.93		-0.61	-0.46	-0.59	-0.86	-1.07	0.21	-0.14	-0.12	-0.07	-0.53	-0.75	-0.31		1.09	-0.03	1.52	1.95	2.29	1.37	0.9	0.89	1.59	0.34	-0.94	0.52	0.17		-1.14
GENE6676X	IMAGE:795877	99936 SNK serum-inducible kinase Hs.3838 AA460152	1	0.25	-0.15	-0.63	-0.68	-0.48	-0.69	-0.37	0.47		0.74	0.02	-1	-0.99	-0.94	-0.41	1.14	-0.22	1.94	-0.29	-0.15	0.9	1.16	0.15	0	-0.48	0.58	-0.34	-0.19	-0.64	-0.32	0.54	0.84	-0.72	1.23	0.54	2	1.58	1.69	-0.12	0.97	-0.26	-0.33	0.34	0.12	-0.87	-0.93
GENE3199X	IMAGE:841141	118377 TMEPAI transmembrane, prostate androgen induced RNA Hs.83883 AA486591	1	-0.14	-0.08	-1.45	0.27	-0.98	-0.91	-0.13	0.84	0.41	1.83	1.05	-0.66	-0.77	-0.55	-1.49	1.8	-0.42	1.98	-0.59	-0.52	1.37	0.98	0.74	0.96	-0.59	1.33	-0.78	-0.89	-1.49	-1.72	0.35	-0.23	-0.43	0.9	0.63	2.43	2.62	1.04	-0.31	1.35	0.48	0.56	1.8	1.17	-0.46	-2.03
GENE882X	IMAGE:511233	105129 TMEPAI transmembrane, prostate androgen induced RNA Hs.83883 AA088701	1	-0.5	-0.14	-1.62	0.16	-1.21	-0.8	0.64	1.62	1.04	2.4	2.03	-0.44	-0.95	-0.89	-1.18	0.74	-0.01	2.03	-0.1	-0.5	1.62	0.68	0.69	0.43	-0.76	1.2	-1.17	-0.78	-1.8	-1.96	0.26	-0.23	-0.49	0.91	0.47	3.45	2.29	0.71	-0.06	2.04	-0.01	0.42	1.65	0.9	-0.23	-2.44
GENE2816X	IMAGE:809824	116205 TMEPAI transmembrane, prostate androgen induced RNA Hs.83883 AA455519	1	-0.64	-0.15	-1.37	-0.19	-0.68	-0.89	-0.24	0.82	-0.09	1.24	0.72	-0.82	-1.23	-0.68	-0.83	1.67		1.64	-0.6	-0.33	0.91	0.86	-0.61	0.37	-0.73	0.62	-0.74	-0.68	-1.01	-1.07	0.54	-0.64	-0.75	0.85	0.71	3.21	1.53	-0.23	-0.03	0.73	0.43	-0.45	1.17	0.83	0.17	-1.49
GENE127X	IMAGE:502151	100686 SLC16A3 solute carrier family 16 (monocarboxylic acid transporters), member 3 Hs.85838 AA129777	1	1.1	0.61	-0.17	-1.17	-0.72	-0.45	-0.1	1.99	0.87	1	0.63	0.55	0.38	1.03	0.17	-0.11	1.73	1.33	1.21	0.13	0.69	-0.14	0.72	-0.04	0.23	0.64	1.15	0.23	0.33	0.27	0.28	0.32	-0.11	0.75	1.23	1.06	1.59	0.25	0.53	1.06	-0.13	-0.54	-0.31	-0.79	-1.66	-1.97
GENE1408X	IMAGE:2067059	108167 PEG10 paternally expressed 10 Hs.137476 AI378946	1	0.25		-0.72	0.25	-0.91	-0.49	-0.17	0.58	1.37	0.69		1.1	-0.7	0.13	-1.06	1.17	0.39	2.03		0.29	2.62	0.12	-0.24	-0.4	-0.16	0.09	0.33	-0.04	-0.37	-0.1	-0.37	-0.2	-0.6	0.19	-0.09	0.21	1.38	0.06	-0.49	0.57	0.3	0.83	1.04	0.32	0.27	-1.14
GENE4510X	IMAGE:731203	224633 FSTL3 **follistatin-like 3 (secreted glycoprotein) Hs.25348 AA417274	1	0.46	0.43	-0.23	-0.03	-0.36	0.37	-0.98	0.11		1.54	-0.6	-1.28	0	-0.59	-0.7	-0.97	-0.15	0.51	-0.51	0.21	1.48		0.41	-0.14	-0.06	0.47	0.14	0.2	-0.9	-1.01	-1.05	-0.39	-1.22	1.23	0.35	0.77	0.91	1.32	0.08	0.38	0.5	0.21	0.08	-0.35	-1.24	-1.13
GENE5331X	IMAGE:1588935	308825 PHLDA3 pleckstrin homology-like domain, family A, member 3 Hs.268557 AA975612	1	0.96	0.49	-0.62	-0.71	-0.22	0.53	0.88	0.62			0.64	-0.46	-0.81	0.31	-0.27		0.48	0.46	-0.54	-1.23	0.33	-0.63	-0.77	-0.02	0.02	-0.18	-0.24	-1.16	-0.64	0.31	-0.27	0.34		0.54	0.06	0.59	0.08	0.38	0.41	1.18		-0.89	0.08	0.45	-0.87	-0.96
GENE776X	IMAGE:154173	104402 COL5A3 collagen, type V, alpha 3 Hs.235368 R52037	1	0.21	0.32	0.14	-0.5	-0.39	-0.88	0.04		0.35	1.34	-0.4		0.27	0.27	-0.45	0.61	0.44	1.23	0.29		1	-0.67	0.29	0.31	0.28	0.19	0.03	0.43	-0.44	-0.12	-0.53	0.39	-0.45	-0.81	-0.16	0.62	-0.28	0.11	0.29	0.48	0	0.23	-0.48	-0.68	-0.55
GENE3416X	IMAGE:841650	119716 TRIO triple functional domain (PTPRF interacting) Hs.171957 AA487480	1	-0.34	-0.51	-0.5	-0.9	0.06	-0.39	1.14		0.49	0.85	1.71	0.68	-0.11	0.14	-0.31	-0.48	0.08	0.6	0.36	-0.39	-0.52	-0.57	0.23	0.63	-0.33	0.63	-0.44	0.35	-0.42	-0.37	-0.72	-0.04	-0.17	0.09	-0.02	0.63	0.78	0.56	-0.35	0.13	-0.46	-0.59	-0.12	0.02	-0.13	-1.15
GENE154X	IMAGE:347345	100900 ESTs Hs.58632 W81648	1	0.04	0.03	-0.03	0.08	-0.39	0.18	1.11	-0.31	0.02	-0.34		0.43	0	0.16	0.07		0.06		0.51			0.01	0.58	0.43	0.06	0.28	-0.21	0.2	-0.65	-1.08	0.25	-0.06	-0.27	-0.07	0.19	0.4		0.53	-0.32	0.4	0.57	0.37	0.35	0.29	0.42	-0.49
GENE211X	IMAGE:490377	101249 BACE beta-site APP-cleaving enzyme Hs.49349 AA136283	1	-0.1	-0.5	-0.46	-0.83	-0.43	-0.57	0.66	-0.87	0.15		0.47	1.47	-0.01	-0.15	-0.17	-0.8	-0.3	-0.34	0.3	-0.44	0.04	-0.35	0.27		0.26	0.09	-1.01	0.34	-0.01		-0.3	-0.84	-0.39	1.03	-0.35	0.8	0.47	0.4	0.03	0.5	0.03	-0.03	-0.03	0.11	0.28	-0.87
GENE4503X	IMAGE:1461313	224584 DKFZp762O076 hypothetical protein DKFZp762O076 Hs.21621 AA883397	1		0.2	-0.55	-0.82	-0.81	-0.21	-0.57	0.47	-0.39	0.28		1.04	0.22	-0.63	-1.06		-0.13		-0.52	-0.39	0.55	0.74		-0.32		-1.6	0.32	-0.18	-0.87	-0.96	-0.43	-0.95	0.13	-0.99	0.8	0.69	1.66	0.57	-0.08	-0.15	0.45	-0.79	0.77	1.51	0.43	-1.51
GENE5679X	IMAGE:1649583	311242 ESTs Hs.71818 AI028074	1	-0.65	0.1	-0.63	-0.3	-0.23	-0.03	0.26	1.43	-0.85	-0.4		-0.26	0.26	-0.21	-0.45		-0.23	0.98	-0.14	0.3	-0.23	0.2	-0.14		-0.59	-0.99	-0.64	0.12	-0.96	-1.12	-0.82	-0.57	0.56	-1.24	-0.66	1.73	1.39	-0.47	0.08	0.18	-0.31	0.22	0.72	1.25	1.8	-1.25
GENE6128X	IMAGE:1882801	317231 ESTs Hs.149458 AI279296	1	-0.62		-1.71		1.28	-0.41	-0.27	0.21	1.64		1.38	2.14	0.66	1.1	-1.82	-1.77	-0.41	-0.39		1.41	-0.31	0.93		0.08	0.16	-0.5	0.56	0.04	-0.34	-0.24	-0.8	-0.3	0.89	-1.24	-0.42		0.38	-0.38	0.27	1.66	0.91	0.8	1.09	1.89		0.71
GENE1092X	IMAGE:199367	106310 TNRC3 trinucleotide repeat containing 3 Hs.21858 R95691	1	0.12		-0.85	0.41	-0.4	-0.66	0.44	-0.23	-0.36	0.41	0.79	1.78	0.09	0.44	-2.38	-3.11	0.08	-0.82	-0.47	-0.58	0.29	-0.72	0.35	0.45	-0.32	0.7	-1.77	0.12	-0.68	-1.08	-0.36	-1.69	-0.35	-0.93	-0.97	-0.82	1.99	-0.18	-0.26	-0.01	-0.3	2.08	1.73	2.01	2.4	-0.22
GENE2689X	IMAGE:246722	115463 TNRC3 trinucleotide repeat containing 3 Hs.21858 N57754	1	0.67	-0.55	0.2	-0.28	-0.24	-0.54	-0.5	-0.22	-0.37	0.07	0.27	1.71	0.32	0.95	-1.34	-2.53	0.62	-0.88	0.01	-0.5	0.44	-0.68	0.03	-0.24	-0.14	0.86	-0.6	0.36	-1.17	-1.42	-0.58	-1.31	-0.55	-1.14	-0.74	-1.28	1.88	-0.35	0.47	-0.55	0.03	1.7	1.44	1.6	2.18	-0.53
GENE5098X	IMAGE:25763	307359 ANKH ankylosis, progressive homolog (mouse) Hs.168640 R12303	1	0.06	-0.58	-0.08	-0.28	-0.4	0.02	-0.5	0.82	1.53	1.4	1.59	2.72	0.09	1.03	0.3	0.33	0.45	-0.14	-0.15	0.79	0.21	0.22	-0.47		0.1	-0.27	-0.39	0.51	-0.32	-0.21	-0.36		0.37	-0.93	-0.39	-0.31	0.09	-0.26	0.18	0.14	1.36	-0.18		0.27	0.81	-0.67
GENE817X	IMAGE:767469	104700 ANKH **ankylosis, progressive homolog (mouse) Hs.168640 AA418007	1	0.07	-0.85	-0.42	-0.85	-0.56	-0.01	-0.29	0.58	1	1.3	1.34	2.62	0.24	0.71	-0.32	-1.47	0.21	-1.31	-0.51	0.65	0.07	0.8	-0.07	-0.77	0.25	0.3	-0.36	0.76	-0.21	0.01	-0.8	-0.79	0.37	-1.19	-0.84	-0.72	0.37	-0.87	-0.24	0.52	1.44	0.33	0.71	0.59	1.05	-1.4
GENE1382X	IMAGE:280845	108011 ANKH ankylosis, progressive homolog (mouse) Hs.168640 N47523	1	0.06	-0.7	-0.14	-0.69	-0.37	0.01	-0.43	0.48	0.92	1.57	1.33	3.13	0.09	0.38	-0.49	-1.82	-0.12	-0.89	-0.79	0.44	-0.11		-0.52	-0.24	0.53	0.51		0.83	-0.02	-0.18	-0.83	-0.6	0.37	-1.34	-0.71	-0.89	0.2	-1.01	-0.27	0.31	1.4	0.3	0.73	0.57	1.14	-1.41
GENE3390X	IMAGE:239889	119540 ANKH ankylosis, progressive homolog (mouse) Hs.168640 H81907	1	0.11	-0.49	0.11	-0.69	-0.26	0.03	-0.03	0.22	1.38	1.52	1.31	2.11	0.07	0.36	-0.25	-0.43	0.03	-1.54	-0.28	0.47	-0.12	0.92	-0.1	-0.28	0.35	0.17	-1.05	0.71	0.06	-0.05	-0.29	-0.11	0.65	-1.21	-0.86	-0.43	0.05	-0.63	0.08	0.39	1.69	0.29	0.87	0.87	1.39	-1.34
GENE4900X	IMAGE:970743	226785 KIAA0537 KIAA0537 gene product Hs.200598 AA774839	1	-0.04	-0.1	-0.93	-0.69	0.47	0.73	0.8	0.4		1.13	0.5	0.58	-0.28	-0.02	-0.63	-1.32	0.11			0.37	-0.4	-1.07	-0.08	0.35	0.94	0.28	-0.15	0.52	-0.07	0.48	-0.29	0.54	-0.47	-1.03	-0.18	0.38	0.85	-0.44	0.75	0.56	0.26	-0.84	-0.26	0.04	-0.33	-0.5
GENE2281X	IMAGE:633045	113141 CDH13 cadherin 13, H-cadherin (heart) Hs.63984 AA160651	1	0.47	0.09	1.3	-0.31	-0.89	0.09	-0.89	-0.3	0.33	0.65		0.12	0.69	1.14	-0.13	0.59	1.66	1.21		0.78	-0.38	0.8	0.95	0.09	0.82	0.81	0.52	0.64	-0.41	0.47	-0.15	-0.42	-0.14	-0.99	-0.29	-0.32	0.53	0.21	-0.23	0.33	-0.05	-0.06	0.16	-0.12	-0.93	-0.91
GENE2878X	IMAGE:415851	116517 ARHE ras homolog gene family, member E Hs.6838 W86282	1	0.64	0.42	0.67	0.12	-1.08		1.12	-0.1		1.65	-0.17	0.06	-0.2	0.92	0.28	1.01	0.8	0.26	0.22	-0.49	-0.05	0.45	0.08	0.08	0.83	0.33	-0.18	0.37	0.38	0.36		0.22	0.44	-0.3	0.41	0.62	0.96	0.84	-0.39	0.26	1.01	0.03	1.72		-0.67	-1.03
GENE374X	IMAGE:784593	102204 ARHE ras homolog gene family, member E Hs.6838 AA443302	1	0.29	0.19	0.34	0.08	-0.4	-0.26	1.55	-0.5	0.83	1.98	-0.05	0.31	-1.01	0.92	0.1	0.54	0.44	0.46	1.18	-0.95	-0.7	-0.23	0.11	-0.26	0.59	0.56	-0.8	0.74	0.17	0.15	0.07	0.08	0.06	0.03	0.63	0.92	1.03	0.73	0.29	0.13	0.31	0.2	1.57	0.94	-1.14	-1.66
GENE5691X	IMAGE:1892526	311398 EST Hs.231927 AI277348	1	0.07	0.31	0.21	0.86	-0.47	-0.96	1.25		0.82	2.37	-0.29	-0.63	-1.28	0.76	0.12		0.41	0.77	0.48	-1.06	-0.6	-0.43	-0.31	-0.12	0.7	0.82	-0.75	0.37	0.54	0.24	-0.05	0.06	0.4	-0.33	0.29	0.81	1.03	0.74	-0.1	0.45	0.4	0.18	1.58	1	-1	-1.8
GENE3740X	IMAGE:253884	220186 Homo sapiens, clone IMAGE:3625286, mRNA, partial cds Hs.121520 N22620	1	-0.41	-1.13	-1.36	-0.09	-0.37	-0.75	1.68	1.32	-0.06	0.71	0.29	0.39	-0.14	-0.28	-0.92	-1.12	-0.84	0.13		-1.18	-1.11	-0.26				1.8	-0.6	-0.05	-0.87	-0.68	-0.79	-0.39	0.3	-0.75		2.77	2.79	-0.04	0.5	1.23	1.06	-0.97	1.74	1.92	-1.11	-0.83
GENE2585X	IMAGE:308231	114887 MYO1B myosin IB Hs.121576 N95358	1	-0.47	0.11	0.01	-0.15	-0.01	-0.88	1.13	0.19	0.27	1.94	0.35	0.16	0.69	1.03	0.72	-1.25	1.17	0.3	0.41	-0.05	0.9	0.65	0.09	-0.21	0.08	0.59	0.37	0.84	0.09	0.23	-0.59	1.41	-0.47	-2.27	0	0.49	0.51	-0.37	0.24	0.39	0.74	-0.58	0.32	0.37	1	-0.36
GENE1784X	IMAGE:428721	110268 H19 H19, imprinted maternally expressed untranslated mRNA Hs.334822 AA004638	1	-0.22	0.29	-0.38	-0.8	-0.38	-1.09	0.16	-3.15	0.16	0.9	3.27	0.84	2.97	0.68	-0.86	-2.48	-0.11	-0.96		3.49	0.2	-0.55	-0.22	-0.65	-0.61	2.48	0.45	-0.42	-0.23	0.15	-1.66	-0.97	-1.52	-0.91	-0.58	0.79	1.29	4.24	0.31	0.02	-1	-0.3	0.18	-0.76	-0.48	0.1
GENE2615X	IMAGE:2314831	115053 SV2B synaptic vesicle protein 2B homolog Hs.8071 AI669959	1	-0.71	-0.32	-0.72	-0.59	-0.66	-1.03	-1.07	0.61	2.92	3.35		1.74	2.08	0.08	-1.7	-0.3	-0.66	0.23		2.93	-0.26	-0.71	-0.9	-1.06	-1.13	2	-0.59	-0.62	-0.71	-0.37	-1.62	-1.08	-1.43	0.3	-0.01	0.92	1.76	3.13	-0.52	0.15	-0.26	-1.22	1.8	-0.53	-0.32	2.44
GENE2484X	IMAGE:898218	114308 IGFBP3 insulin-like growth factor binding protein 3 Hs.77326 AA598601	1	0.35	-1.9	-2.31	-0.31	-0.31	1.16	1.42	1.72	0.1	0.12	-0.7	1.28	-1.6	-0.15	-0.23	-1.88	0.64	0.52	-0.39	-0.75	2.02	-0.19	-0.34	0.07	-0.23	1.19	-1.03	1.35	1.1	1.35	1.36	-0.79	-1.19	1.55	-0.3	2.49	1.69	-1.77	-0.06	0.1	1.15	-1.21	1.02	-0.83	-1.61	-1.09
GENE2567X	IMAGE:269293	114799 FLJ12584 hypothetical protein FLJ12584 Hs.288897 N26671	1	0.21	0.16	-0.24	-0.19	0.1	-0.19	0.04		-0.48	0.27		0.15	0.16	0.74	0.28	-0.11	-0.01		-0.13	-0.04	-0.2	0		0.11	0.07	-0.91	1.47	-0.15	0.24	0.27	-0.93	0.24	-0.65	0.89	0.53		0.51	0.05	0.39	0.63	0.11	0.03	0.44	-0.43	0.52	-0.3
GENE835X	IMAGE:589869	104817 TAZ transcriptional co-activator with PDZ-binding motif (TAZ) Hs.24341 AA148213	1	0.09	-0.04	-0.41	-0.97	0.23	-0.5	-0.65	0.34	0.34	0.34	0.13	-0.55	-0.27	-1.13	-0.74	-0.43	-0.04	2.54	0.4	0.16	0.15	1.35	0.2	-0.12	-0.32	-1.02	1.51	0.87	-0.27	-1.1	-1.22	1.63	-0.31	-1.04	0.59	1.43	2.36	0.54	-0.53	0.72	0.58	0.03	0.23	0.56	0.28	-1.39
GENE2057X	IMAGE:242797	111904 TAZ transcriptional co-activator with PDZ-binding motif (TAZ) Hs.24341 H94043	1	-0.02	-0.16	-0.55	-0.95		-0.49	-0.49	-0.23	-0.45	0.03	0.16	0.12	-0.41	-0.94	-0.91	-1.36	-0.35	2.16	-0.03	0.28	0.28	0.76	0.03	0.17	-0.75	-0.33	1.27	1.12	0.64	0	-1.2	1.05	-0.2	-0.8	-0.08	1.15	1.37	0.19	-0.31	0.71	1.07	0.14	0.51	0.4	0.37	-0.32
GENE2119X	IMAGE:429234	112258 TRIO triple functional domain (PTPRF interacting) Hs.171957 AA007298	1	-0.24	0.04	-0.38	-0.95	-0.32	-0.77	-0.01	0.43	0.19	0.94	1.74	0.99	-0.11	-0.65	-0.44	-0.31	-0.38	-0.01	-0.6	0.73	0.36		-0.1	-0.11	0.08	-0.41		0.79	0.36	0.2	-0.1	0.13	0.52	0.23	0	0.68	0.81	0.03	-0.74	0.69	0.91	-0.31	0	0.35	0.43	-1.57
GENE4927X	IMAGE:867606	226943 ACTB actin, beta Hs.288061 AA780815	1	-0.4	-0.86		-1.07	-0.2	-0.78	0		-0.19	0.31	-1.19	-1.59	-0.22	-1.24	-1.27	-0.98	-0.38	-0.07		-1.01	-0.09	-0.16		-0.8		-0.66	0.09	-0.43	-0.51	-0.55	0.18	0.32	-0.35	-0.38	0.14	0.42	0.32	-1.03	1.18	0.83	1.39		0.22	-0.06	2.27
GENE6539X	IMAGE:491186	99155 Homo sapiens cDNA: FLJ23131 fis, clone LNG08502 Hs.301296 AA137073	1	-0.74	-0.47	-0.44	-0.4	-0.12	-0.21	-0.17	-0.26	0.08	0.06	-1.13	-0.57		-0.2	-0.57	-0.97	-0.11		-0.43	-0.61	-0.43	-0.16	1.08	-0.38	-0.14	-0.11	-0.69	-0.37	-0.08	-0.16	-0.56	-0.46	-0.09	-0.33	-0.71	0.75	1.61	-0.24	0.34	0.03	0.41	0.01	0.48	-0.61	-0.24	-0.18
GENE4765X	IMAGE:137554	226077 DEPP decidual protein induced by progesterone Hs.93675 R39563	1	1.29	-0.46	1.09	0.33	-1.29	0.57	-0.51	-1.03	0.35	-0.3	-1.46	0.12	-0.7	-0.16	-0.36		1.61	-1.33	-0.26	-0.47	-0.59	-0.19	-0.79	-1.01	-0.1	-1.59	-1.35	-0.03	-0.67		-0.41	-0.04	-1.37	-0.48	0.04	1.28	0.39	-1.06	-0.24	-0.71	1.17	-0.51	-0.01	0.51		0.07
GENE977X	IMAGE:245774	105665 DEPP decidual protein induced by progesterone Hs.93675 N55269	1	0.71	-0.78	1.02		-0.48	0.35	-0.12	-0.56	0.15	0.42	-0.49	0.13	-0.85	-0.18	-0.87	-0.76	1.62	-0.87	0.36	-0.86	-1.18	-1.81	-0.84	-0.96	-0.39	-1.26	-1.43	-0.49	-1.15	-0.56	-0.83	-0.61	-1.97	-0.78	-0.13	1.16	0.37	-1.31	-0.33	-0.06	0.56	-0.52	-0.22	-0.15	-1.18	0.09
GENE3486X	IMAGE:135811	120092 DEPP decidual protein induced by progesterone Hs.93675 R33362	1	0.53	-0.21	0.45	-0.11	-0.46	-0.02	-0.68	0.15	0.59	0.37	0.14	0.03	-0.09	0.23	-0.32	-0.18	1.29	-0.41	0.19		-0.67	-0.39	-0.46	-0.32	0.05	-0.31	0.12	-0.19	-0.35	-0.2	-0.8	-0.21	-0.89	-0.28	-0.59	-0.23	0.26	-0.42	-0.41	-0.46	0.08	-0.39	-0.15	0.07	-0.48	-0.12
GENE1671X	IMAGE:108837	109619 SCYA2 small inducible cytokine A2 (monocyte chemotactic protein 1) Hs.303649 T77816	1	-0.18	0.86	-0.56	-1.21	-0.27	-0.36	-0.51	-0.42	-0.13			-0.65	0.56	0.23	-0.56	-0.96	0.11			-0.89	0.41	-0.96	0.75	-2.07	-0.01	-1.52	-0.88	-0.09	-1.33	-0.68	-1.77	0.03	-1.59	-0.97	0.27	0.41	1.49	-1.1	-0.41	0.03	-0.37	-1.03	-0.58	2.05	0.9	0.4
GENE2589X	IMAGE:768561	114904 SCYA2 small inducible cytokine A2 (monocyte chemotactic protein 1) Hs.303649 AA425102	1	-0.32	0.57	-0.43	-0.88	-0.16	-0.15	0.07	-0.86	-0.39	0.13	0.43	-0.67	0.44	-0.12	-0.43	-1.4	0.01	-1.58	-0.22	-0.72	0.24	0.04	0.65	-1.15	-0.14	-0.55	0.15	-0.26	-1.18	-0.7	-2.01	0.07	-1.38	-1.1	0.5	0.46	1.17	-0.55	-0.18	0.13	-0.55	-0.5	-0.71	1.73	0.89	0.37
GENE6555X	IMAGE:782760	99208 CYP1B1 cytochrome P450, subfamily I (dioxin-inducible), polypeptide 1 (glaucoma 3, primary infantile) Hs.154654 AA448157	1	-0.12	-0.05	0.73	-0.16	-0.2	-0.76	-0.48	0.45	-0.03	-0.29	-0.55	-0.41	-0.18	0.1	-0.67	-0.73	0.03	-1.17	-0.78	-0.99	-0.54	-0.66	-0.52	-0.24	0.18	-0.76		-0.45	-0.62	-1.06	-0.93	-0.57	-0.85	-0.89	0.24	0.17	0.57	-0.28	-0.47	-0.06	-0.6	-0.74	-0.23	1.09	-0.17	-0.42
GENE6610X	IMAGE:786657	99524 EST Hs.99258 AA451886	1	-1.13	0.08	0.68	-0.54	0.25	-0.98	0.21	-0.15	-0.52	-0.9	-0.86	-2.05	-0.2	-0.15	-2.01		-0.7	-2.47	-1.39	-2.45	-1.08	-0.89	-1.2	-0.26	0.47	-2.17	-1.21	-0.36	-0.3	-1.19	-1.97	-1.34	-1.52	-1.05	0.93	1.3	1.35	-1.23	-0.28	1.12	-0.12	-0.88	-0.31	1.51	-0.57	-0.05
GENE1613X	IMAGE:470159	109276 CYP1B1 cytochrome P450, subfamily I (dioxin-inducible), polypeptide 1 (glaucoma 3, primary infantile) Hs.154654 AA029776	1	-0.63	0.49	1.75	-0.51	0.28	-0.67	0.4	1.01	-0.21	-1.27		-1.52	-0.36	-0.05	-1.34		-0.17			-1.31	-0.75	-1.08	-1.55	-0.46	0.38	-1.53	-1.27	-0.23	-0.82	-1.25	-1.88	-0.99		-1	0.99	0.85	1.41	-0.9	-0.1	0.61	-1.2	-0.8	-0.11	1.46		0.26
GENE2457X	IMAGE:486055	114179 CYP1B1 cytochrome P450, subfamily I (dioxin-inducible), polypeptide 1 (glaucoma 3, primary infantile) Hs.154654 AA040872	1	-0.15	0.69	1.47	0.17	-0.06	-1.39	-0.12	1.21	-0.1	-0.07		-1.26	0.13	0.41	-1.75	-1.26	-0.49	-1.3		-1.41	-1.03	-1.08	-0.4	0.04	0.42	-0.7	-0.65	0.4	-0.23	-1.3	-1.59	-0.66	-1.81	-1.43	0.17	0.53	1.26	-0.44	-0.33	0.86	-0.05	-0.53	-0.39	1.35	-0.51	-0.36
GENE2659X	IMAGE:785975	115278 F13A1 coagulation factor XIII, A1 polypeptide Hs.80424 AA448599	1	0.34	0.24	-0.28	-0.13	-0.32	-0.24	-0.06	-0.67	-0.08	0.57	-0.16	-0.64	-0.08	0.27	-1.45	-0.36	0.21	-0.92	-0.29	-1.07	-0.5	-0.46	-0.53	-0.45	-0.26	-0.75	-0.29	-0.38	-0.69	-1.23	-0.71	-0.62	-0.26	-0.52	0.14	-0.34	0.86	-0.54	-0.5	-0.17	-0.06	-0.62	-0.27	0.51	0.94	-0.28
GENE5072X	IMAGE:1566793	307193 EBI2 Epstein-Barr virus induced gene 2 (lymphocyte-specific G protein-coupled receptor) Hs.784 AI123732	1	0.21	-0.58	-0.8	0.62	0.05	0.3	0.16		0.53	0.34	-1.4	-0.33	-0.13	0.64	-0.65	0.77	0.35	-1.16	0.25	-1.69	-0.84	-0.4	-1.2	-0.89	0.25	-0.49	-0.54	0.07	-0.48	-1.07	-0.52	0.07	0.08	-0.03	-0.17	-0.88	0.82	-0.09	-0.33	-0.41	0.1	0.28	0.3	2.13	1.3	0.33
GENE2475X	IMAGE:502674	114248 Homo sapiens mRNA; cDNA DKFZp434F053 (from clone DKFZp434F053) Hs.301152 AA135885	1	-0.29	-0.22	-0.1	-0.04	-0.01	0.91	-0.68	0.08	-0.36	0.5	-0.04	-0.76	-0.2	-0.88	-0.86		-0.15	-1.39	-0.24	0.12	-0.56	-0.64	-1.11	-0.42	-0.86	-1.15	-0.67	0.06	-0.93	-0.78	-1.27	-0.79	-0.32	-1.41	-0.21	-0.43	-0.75	-0.8	0.16	-0.17	-0.15	-0.45	-0.51	0.51	1.76	-0.48
GENE5628X	IMAGE:1555924	310795 CSR1 CSR1 protein Hs.128856 AA977646	1	0.42	0.09	-0.54	0.22	-0.54	-0.35	-0.08	-0.96	-1.26	-0.66	-1.18	0	0.01	-0.66	-0.64	-3.07	-0.21	-1.53	0.53	0.12	-0.04	-0.32	-0.33	0.18		-0.79	-0.28	-0.22	0.03	-0.57	-0.92	0.41	0.23	-0.38	-0.05	0.16	-0.24	-0.41	-0.43	0.02	-0.51	-0.05	-0.48	-0.04	1.86
GENE3207X	IMAGE:154790	118434 NGFR nerve growth factor receptor (TNFR superfamily, member 16) Hs.1827 R55303	1	0.16	-0.3	1.27	-0.74	-0.07	-0.57			-1.45	-1.08	-0.79	0.45	0.2	-0.25	-0.23	-1.91	0	-1.93	0.12	-0.43	-0.32	0	-0.16	-0.03	0.35	0.08	0.06	0.25	-0.06	-0.03	-1.61	-0.66	-0.23	-0.63	-0.18		0.53	0.6	-0.35	-0.05	-0.53	-0.52	-0.56	0.79	3.8	0.88
GENE1505X	IMAGE:758309	108691 Homo sapiens cDNA FLJ31627 fis, clone NT2RI2003338 Hs.6786 AA401230	1	-0.53	-0.18	0.08	-1.17	-0.69	-0.41	-0.61	-0.13	-0.4	-0.42	-0.28	-0.46	-0.28	-0.37	-0.39		0.01	-1.02	-0.27	0.3	-0.49	0.33	0.05		-0.06	-0.58	-0.99	-0.51	0.11	-0.4	-1.28	-0.56	-0.44	0.57	-0.1	1.18	0.55	0.44	0.35	0.38	-0.33	-0.69	-0.5	-0.09	0.31	-0.54
GENE4491X	IMAGE:325014	224537 PBX3 pre-B-cell leukemia transcription factor 3 Hs.294101 W48629	1	0	-0.1	-1.42	-0.26	0.61	-0.42	0.71	-0.43		0.2	-0.49	-0.02	0.74	-0.08	0.06		0.44	-0.13	-0.25	-0.52	-1.1	-0.46	-0.66	-0.8	0.32	0.23	-0.76	-1.12	-0.31	-0.54	-0.71	-1	-0.86	0.11	-0.01	0.23	1.09	-0.56	0.22	1	-0.44	-0.77	-0.49	-0.44	0.52	-1.39
GENE4191X	IMAGE:826103	222884 Homo sapiens cDNA FLJ31938 fis, clone NT2RP7006539 Hs.351561 AA521416	1	-0.17			0.62	-0.22	-0.3	0.21	1.96	-0.18			0.2	-0.42	-0.38	-1.01		0.12	-0.19	0.42	-0.56	-0.38	-1.32	-0.81	-0.42	-0.44	-0.39	-1.01	-0.55	-0.12	0.31	-0.84	-0.4		-0.23	0.32	0.28	0.21	-0.15	-0.4	0.15	-0.83		-0.55	-0.5	2.05	-0.54
GENE2084X	IMAGE:134430	112043 Homo sapiens mRNA full length insert cDNA clone EUROIMAGE 248114 Hs.8963 R32025	1	-0.63		-0.23	-0.23	-0.17	-0.39	-0.41	0.57	-0.43	0.98	-0.1	-0.99	-0.58	-0.58	-0.89	0	0.11	-0.24	-0.23	-1.42	-0.65	-1.61	-1.46	-0.82	-0.21	-0.42	-1.42	-0.94	-0.06	-0.49	-0.1	-0.41		-0.08	0.2		0.58	-0.74	-0.94	0.7	-0.42	-0.34	-0.37	0.43	0.02	-0.33
GENE6506X	IMAGE:813179	98934 IGF1 insulin-like growth factor 1 (somatomedin C) Hs.85112 AA456321	1	-0.32	0.4	-0.17	-0.46	-0.05	-0.57	-0.04	1.43	-0.47	-0.06	-0.36	-0.07	-0.68	-0.26	0.06	-0.55	-0.01	-0.97	-0.2	-0.43	0.43	-0.63	-0.7	-0.43	-0.46	-0.86	-0.2	-0.53	0.26	-1	-0.59	-0.46	-0.8	-0.81	1.28		-0.4	-0.74	-0.38	0.6	-0.24	0	-0.33	-0.24	0.93	0.08
GENE4887X	IMAGE:855610	226737 KIAA1029 synaptopodin Hs.5307 AA664237	1	-0.56	-0.14	-1.3	-1.21	0.14	-0.51	-0.88	-1.81	-0.26			-1.35	-0.63	-0.52	-0.58	-1.32	-0.01		0.31	-0.55	-0.75	-0.85	-0.82	-0.68	-0.65	-0.53	-0.75	-1.27	1.04	1.3	-0.65	-1.01	-0.68	-0.44	-0.7	0.99	-0.26	-1.12	-0.18	0.53	0.33	0.88	-0.59	-0.54	-1.14	-0.11
GENE555X	IMAGE:135800	103112 KIAA0610 KIAA0610 protein Hs.118087 R33103	1	0.34	0.06			-0.33	-0.31	0.19	0.89	-0.63	-0.03	-1.04	-0.16	-0.32	-0.61	-0.48	-1.61	-0.41	-1.09	-0.52	-0.5	0.66	-0.37	-0.11	-0.12	-0.03	-0.22	-0.93	0.04	-0.32	-0.72	-0.82	-0.26	-0.71	-1.03	-0.01	0.59	-0.2	0.02	-0.15	0.11	-0.14	-0.11	-0.26	0.25	-0.84	-1.45
GENE1285X	IMAGE:279905	107482 KIAA0610 KIAA0610 protein Hs.118087 N38860	1	-0.4	-0.01	-0.32	0.05	-0.58	0.09	0.49	0.97	-0.64			0.08	-0.86	-0.71	-0.55	-1.08	-0.69	-1	-0.87	-1.24	0.63	-0.44	-0.15	0.1	-0.51		-1.01		-0.77	-1.09	-1.07	0.24	0.03	-1.61	0.08	0.38	-0.52	-0.25	-0.32	-0.01	-0.23	-0.49	-0.59		-1.25	-1.19
GENE2674X	IMAGE:191882	115373 FLJ20701 hypothetical protein FLJ20701 Hs.169764 H38799	1	-0.33	-0.14	-0.35	0.1	-0.29	-0.44	0.12	0.84	0.14	1.98	-1.1	0.34	-0.92	-0.54			-0.27	-0.25	-0.58	-0.67	-0.25		-1.45	-0.77	-0.53	-0.94	-1.04	-0.85	-0.12	-0.27	-0.83		-0.77	-0.49	-0.19	0.69	-0.71	-0.99	-0.92	-0.25	0.68	0.15	0.85	-0.13	-0.89	0.28
GENE3186X	IMAGE:128058	118267 SDPR serum deprivation response (phosphatidylserine binding protein) Hs.26530 R09728	1	-0.16	0.61	0	0.39	-0.25	-0.03	-0.19	-0.51	0.11	-0.05	-0.8	-0.34		0.17	0.58		-0.04		0.62	-0.93	0.25	-0.48		-0.59	-0.44	-1.24	-0.85		-0.68	-0.24	-0.52	-0.44	-0.55	-0.63	-0.1	-0.3	-0.37	-0.38	-0.57	-0.11	0.25	0.25	0.11	0.75	-0.22	-0.31
GENE645X	IMAGE:868304	103615 ACTA2 actin, alpha 2, smooth muscle, aorta Hs.195851 AA634006	1	-0.37	-0.19	-0.47	-0.33	-0.59	-0.72	-0.67	0.37	0.08	0.2	-0.52	-0.7	-0.98	0.17	-0.91	0.11	0.71	0.25	0.56	-0.46	-0.1	-0.53	-0.2	-0.16	-0.47	-0.63	-0.66	-0.07	-0.19	-0.47	-0.39	0.26	-0.65	-0.08	0.09	-0.13	0.07	-0.09	0.54	0.13	0.2	-0.69	-0.58	0.01	0.04	-0.79
GENE3353X	IMAGE:486828	119291 ERBB3 v-erb-b2 erythroblastic leukemia viral oncogene homolog 3 (avian) Hs.199067 AA042878	1	0.28	0	-0.72		-0.12	-0.72	-0.33	0.02	0.73	-0.9		0.07	0.43	0.31	-1.73	-1.08	0.43	0.09		0.06	0.27	0.45	0.76	0.01	0.14	-0.12	-0.34	-0.12	-0.49	-0.64	-0.98	-0.56	-0.41	-0.73	0.27		1.01	0.1	-0.88	0.45	-0.42	-0.27	-0.62	-0.8	0.45	-0.76
GENE1726X	IMAGE:49553	109916 ARF4L ADP-ribosylation factor 4-like Hs.183153 H15084	1	0.54		-1.26	-0.51	-0.56	0.2	0.94	0.25	1.16	-0.73	0.91	0.39	0.58	0.16	-1.63	-1.2	-0.55		-1.4	-0.52	0.09	-0.74	-0.01	-0.65	-0.24	-0.35	-0.54	-0.24	-0.5	-0.44	-1.05	-0.53	-0.37	0.26	-0.27	0.91	0.88	-0.3	-0.58	0.12	-0.66	-0.79	-0.67	-0.22	0.43	-0.2
GENE4142X	IMAGE:471707	222587 CAP2 adenylyl cyclase-associated protein 2 Hs.296341 AA035071	1	-0.42	0.07	-2.11	-0.8	-0.91	-0.98	-0.76	1.55	0.93	1.6	0.78	2.24	0.04	-1.24	-2.23	-1.83	-0.85		0.62	0.18	0.65	0.32	0.17	-0.08	-0.23	-1.51	-0.1	0.19	-0.2	0	-2.15	-0.94	0.31	0.89	0.5	0.15	-0.62	-0.73	-0.13	0.81	0.57	1.01	0.01	0.09	0.95	-1.73
GENE3260X	IMAGE:1567721	118744 ZNF134 **zinc finger protein 134 (clone pHZ-15) Hs.357 AA976255	1	0.2	0.36	-0.91	0.89	-0.09	-0.41	0.6	0.59	0.5	1.3	0.14	0.08	-1.17	0.73	-0.4	1.67	0.12	1.03	0.68	0.15	-0.14	-0.42	-0.85	-0.01	-0.9	-0.58	-0.42	-0.45	-1.2	-1.11	-0.28	-0.39	-0.13	-0.4	-0.11	0.57	0.92	-0.04	-0.51	0.24	0.61	-0.2	0.76	-0.01	0.35	0.26
GENE1886X	IMAGE:768292	110883 DSTN **destrin (actin depolymerizing factor) Hs.82306 AA424824	1	0.2	0.13	-1.14	0.71	-0.54	-0.43	0.48	0.37	0.21	0.86	-0.15	0.04	-1.16	0.58	-0.63	1.37	0.09	0.86	0.28	-0.27	-0.11	-0.3	-0.83	-0.37	-0.7	-0.43	-0.18	-0.62	-1.06	-0.83	-0.51	-0.41	-0.1	-0.25	-0.18	0.57	0.71	-0.04	-0.89	0.46	0.71	-0.37	0.7	-0.17	0.12	0.16
GENE2304X	IMAGE:470001	113251 COL4A5 collagen, type IV, alpha 5 (Alport syndrome) Hs.169825 AA029107	1	-0.03	0.3	-0.2	-0.38	0.06	-0.08	-0.42	1.7	-0.41	-0.37	-0.09	-0.8	-0.54	-0.7	-1	-0.22	-0.27	0.78	1.17	-0.19	1.61	-0.07	-0.86	-0.29	-0.24	-0.32	-0.18	-0.58	-0.78	-0.93	-0.64	-0.53	-0.39	-1.04	-0.77	-0.73	-1	-0.48	-1.01	-0.28	-0.19	0.16	-0.27	-0.53	0.9	-0.4
GENE5276X	IMAGE:1592039	308452 COL4A5 collagen, type IV, alpha 5 (Alport syndrome) Hs.169825 AA953254	1	0.11	0.14	-0.5	-1.45	-0.6	-0.13	-0.87	2.23	-0.27	-0.19	-0.98	-1.3	-0.83	-1.2	-1.92		-0.48	0.35	0.32	0.12	2.73		-0.47	-0.72	0.16	-0.92	-1.58	-0.84	-1.32	-0.67	-0.57	-0.3	-0.51	-1.07		-0.92	-0.92	-0.49	-0.79	-0.2	-0.17	-0.21	-0.64	-1.02	1.62	-0.53
GENE3030X	IMAGE:485854	117274 Homo sapiens, Similar to chordin-like, clone MGC:11264 IMAGE:3942645, mRNA, complete cds Hs.82223 AA040424	1	0.2	0.23	0.11		-0.12	-0.81	-0.39	0.35				-0.51	-0.86	-0.3	-1.04	0.63	0.14		-0.8	-0.58	-0.77	-0.17	-0.11	-0.47	-0.26	-0.77	-0.72	-0.49	-0.55	-0.18	-1.45	-1.75	-0.02	-1.31	-0.86	-0.6	0.24	-0.21	-1.22	0.1	-0.92	-0.49	-0.04	0.31		0.2
GENE488X	IMAGE:666061	102761 EDG2 endothelial differentiation, lysophosphatidic acid G-protein-coupled receptor, 2 Hs.75794 AA193405	1	0.28	-0.26	0.58	0.54		-0.09	-0.62	0.62				-0.56	-0.32	-0.58	-0.59		-0.51			-0.7	-0.3	0.08	-0.91	-0.6	0.08	-0.33	-0.7	-0.67	-0.7	-0.98	-1.61	-0.72	-0.48	-0.14	-0.46	0.49	-0.41	-0.26	0.38	-0.14	-1.05	-0.85	-0.4	0.05		0.11
GENE2817X	IMAGE:784360	116207 EML1 echinoderm microtubule associated protein like 1 Hs.12451 AA447196	1	-0.12	0.45	-0.08	-0.22	-0.26	0.05	-0.45	0.3	-0.88	-0.07		0.3	0.18	-0.21	-0.86	-0.68	-0.12	-0.29	0.16	0.01	-0.28	0.42	-0.33	-0.43	-0.26	-0.69	-0.41	0.21	-0.51	-0.68	-0.62	-0.28	-0.6	-0.84	0.08	-0.33	-0.11	-0.27	0.4	-0.06	-0.55	-0.58	-0.56	-0.25	-0.22	-0.47
GENE6615X	IMAGE:80226	99548 NXN nucleoredoxin 1 Hs.193361 T64216	1	-0.06	-0.01	-1.55	0.35	-0.08	0.04	-0.24	1.07		1.57	1.35	-1.14	-0.07	0.34	-0.64		0.22	0.21	0.24	-0.34	0.35	-0.27	-0.1	-0.28	0.16	0.32	-0.5	-0.32	-0.77	-0.93	-1.19	-0.71	-1.33	0.14	-1.04	1.26	0.82	-0.42	-0.01	0.89	-0.61	-1.03	-0.32	0.05	0.69	-1.53
GENE6462X	IMAGE:1912786	98698 MRAS muscle RAS oncogene homolog Hs.349227 AI304356	1	0.75	0.18	-0.8	0.44	-0.42	-0.46	-0.32	0.67	-0.18	0.48		-0.76	-0.9	-0.13			0.52	2.11		0.21	1.25	-0.54	0.07	-0.02	0.54	0	-0.15	-0.84	-0.6	-0.8	-0.85	-0.31	-0.25	-1.43	-0.1	0.09	0.18	-0.69	0.11	0.77	-0.44	-0.79	0.62	-0.37		-1.57
GENE351X	IMAGE:810459	102039 FZD8 frizzled homolog 8 (Drosophila) Hs.302634 AA457138	1	0.12	-0.81	-1.7	0.43	0.09	0.3	0.27	-0.42	0.96	0.68		0.42	-1.23	-0.73		-2.2	0.24	-0.12	-0.17	-0.16	-1.29	-0.91	-0.26	-0.43	-0.35	-0.87	-1.48	-0.6	-1.56	-0.86	-0.57	-0.84	-1.04	-0.46	-0.56	-0.34	-0.7	-1.47		0.36	0.1	-0.01	-0.36	-0.48	0.57	-0.98
GENE4282X	IMAGE:306812	223377 Homo sapiens, Similar to RIKEN cDNA 2610528G05 gene, clone IMAGE:3875837, mRNA, partial cds Hs.348385 N79049	1	-0.06	-0.03	-1.31	-0.46	0.31	-0.02	-0.44	-0.47	-0.19		-0.13	0.02	-0.74	-0.67	-1.49	-0.84	-0.21	0.26	-0.84	-0.5	-0.38	-0.25	0.16	-0.08	-0.51	-0.96	-0.78	0.09	-0.76	-0.82	-0.41	-0.29	-0.84	-0.49	-0.12	-0.08	0.34	-0.48	0.07	-0.06	-0.26	-0.27	-0.42	-0.42	1.12	-0.44
GENE3881X	IMAGE:450523	221065 TNS tensin Hs.351432 AA704226	1	-0.06	0.59	-1.15		-0.28	-0.33	-0.06	-0.85	-0.33	-0.51		-1.23		-0.67	-1.26	-0.79	-0.39	-0.97	-0.23	-0.42	-1.08	0.73	-0.17	-0.42	0.36	-0.8	-0.69	-0.81	-0.69	-0.33	-0.02	-0.07	-0.01	0.28	0.59	0.19	0.05	-0.78	0.14	0.47	1.12	0.12	0.95	0.45	-0.31	-0.55
GENE4657X	IMAGE:969606	225591 ESTs, Weakly similar to I38022 hypothetical protein [H.sapiens] Hs.339024 AA663730	1	0.21	0.47	-0.98	0.2	0.08	-0.03	-0.15	-0.57				-0.66	-0.5	-0.31	-0.66	-0.67	0.04	-0.98		-1.41	-1.26	0.22	0.46	-0.3	0.58	0.03	-0.26	0.22	-0.19	-0.02	0.39	-0.63	0.16	0.2	-0.15	0.31	0.22	-0.21	0.26	0.82	0.65	-0.17	0.37	-0.74	-1.2	0.01
GENE2399X	IMAGE:171916	113794 CNTNAP1 contactin associated protein 1 Hs.31622 H18963	1	-0.32	0.3	-0.13	-0.49	-0.18	-0.64	-0.41			-1.21	0.25	-0.27	-0.31	-0.35	-0.77	-1.52	-0.13	-0.77	0.3	-0.18	-0.4	-0.07	0.43	-0.44	-0.04	-0.32	-0.72	-0.47	-0.69	-0.5	-0.69	-0.78	-0.42	-0.48	-0.25	0.04	0.18	-0.26	-0.4	0.5	0.16	-0.5	-0.29	-0.71	1.21	-0.74
GENE4960X	IMAGE:897262	227094 LOC55885 neuronal specific transcription factor DAT1 Hs.301914 AA677643	1	0.52	0.47	-1.03	-1.09	0.85	-0.79	0.02	1.54	-0.78			-0.29	-0.22	-0.09	-0.85	-1.19	0.53		-0.05	0.14	0.17	0.42	-0.24	0.34	0.39	0.13	-0.09	-0.75	-0.25	0.61	-1.02	-1.58	-0.55	-0.64	-1.16	-0.32	-0.34	0.03	-0.55	0.59	1.11	0.34	0.26	-1.39	-0.61	-0.63
GENE3088X	IMAGE:782497	117657 BC008967 hypothetical gene BC008967 Hs.6349 AA431770	1	0.16	-0.53	-0.46	0.09	-0.39	-0.2	-0.12	-0.15	-1.39	-0.35		-0.41	-0.67	-1.06	-1.53	-1.44	-0.22	-0.39	-0.85	-0.25	0.17	0.13		-0.15		-0.86	-0.49	-0.55	-0.63	-0.52	0.6	-0.72	-0.85	-0.56	-0.05	0.33	-0.78	-0.51	0.41	0.78	0.3	-0.74	-0.53	-0.67	-1.17	-0.97
GENE4139X	IMAGE:1456155	222577 LOC57100 organic cation transporter Hs.283404 AA862473	1	0.01			0.13	-0.62	-0.32	-0.12	-0.47	-0.13	-0.24	0.86	-0.85	-0.83	-1.46	-1.79		-1.25	-0.75	-0.3	-0.16	-0.97	-0.03	0.08	-0.21	-0.33	-0.95	-0.19	-0.94	-0.07	-1.25	-0.6	-0.53	-0.42	-0.52		-0.11	-0.4	-0.35		0.07	0.36	-0.27	-0.3	-0.24	-0.83
GENE1113X	IMAGE:949938	106479 CST3 cystatin C (amyloid angiopathy and cerebral hemorrhage) Hs.135084 AA599177	1	0.29	-0.52	-0.4	0.1	-0.45	-0.71	-0.35	0.54	0.31	0.45	1.5	1.26	-1.07	0.22	-0.16	0.18	0.28	0.33	0.86	-0.43	0.06	-0.03	-0.55	-0.64	-0.78	-1.12	-1.61	-0.84	-1.29	-1.31	-0.52	-0.99	-0.17	-1.21	-0.71	0.01	-0.75	-1	-0.59	-0.55	-0.2	-1.11	0.36	0	-0.1	-0.4
GENE238X	IMAGE:898122	101391 C7 complement component 7 Hs.78065 AA598478	1	0.3	-0.1	0.75	-0.27	-0.98	-0.91	-0.14	0.37	0.61	-0.21	0.72	0.4	-1	0.34	-0.24	-0.04	0.37	-0.28	0.08	-0.46	-0.22	-0.4	-0.53	-0.57	-0.76	-0.88	-1.34	-1.09	-1.17	-1.2	-0.84	-1.31	-0.94	-1.05	-0.48	-0.46		-0.8	-0.48	-0.43	-0.48	-1.11	-0.25	0.13	-0.16	-0.32
GENE611X	IMAGE:785933	103446 SRPX sushi-repeat-containing protein, X chromosome Hs.15154 AA448569	1	0.45	0.49	-1.05	-0.61	-0.67	0.06	-0.81	-1.09	-1.14	-0.75	-0.25	0.56	-0.63	-0.21	-0.48	-1.93	-0.51	-2.11	-0.19	-0.91	-0.63	-0.48	0.26	0.68	-0.66	-0.54	-1.19	0.52	-0.67	-0.4	-1.61	-0.89	-1.28	-1.6	-0.18	-0.28	0.47	-0.61	0.24	0.38	-0.13	-0.66	-0.89	-0.8	0.81	-0.1
GENE2627X	IMAGE:377692	115119 MAGP2 Microfibril-associated glycoprotein-2 Hs.300946 AA056013	1	0.48	0.02	-0.88	-0.2	-0.4	-0.21	-0.33	-0.8	-0.12	1.13		-0.86	-0.64	0.02	-1.28	-1.13	-0.61	-1.16	0.03	-1.36	-0.88	-0.07	-0.03	-0.69	-0.77	-0.45	-0.42	-0.22	-0.31	-1.2	-1.4	-0.45	-0.82	-0.36	-0.48	-0.68	0.89	-0.81	0.19	-0.28	0.27	-1.01		-0.6	-0.44	-0.35
GENE346X	IMAGE:813154	102009 NFIA nuclear factor I/A Hs.173933 AA456289	1	0.04	0.36	0.11	0.11	-0.09	-0.32	-1.7	0.93	0.13	0.38	-0.65	-0.63	-0.6	-0.2	-0.31	-1	0.31	0.74	-0.44	-0.39	-0.31	0.21		-0.83	-0.4	-0.85	-0.49	-0.52	-0.82	-0.56	-0.49	-0.44	-0.35	-0.83	-0.45	-0.57	-1.39	-0.24	-0.3	0.24	-0.33	0.26	-0.11	-0.69	-0.69	0.96
GENE2708X	IMAGE:2338271	115581 NFIA nuclear factor I/A Hs.173933 AI912047	1	-0.22	0.9	0.2	-0.45	0.07	-0.46	-1.27	1.07	0.68	1.6		-0.7	-0.15	0.28	0.01		0.09	0.93		0.08	-0.29	-0.37	-1.49	-0.61	-0.2	-1.07	-0.31	-0.65	-0.68	0.15	-0.56	-0.53	0.05	-0.89	-0.13	-0.19	-0.65	-0.16	-0.27	0.27	0.08	0.39	-0.05	-0.42	-1.07	0.77
GENE4650X	IMAGE:436399	225550 Homo sapiens HSPC285 mRNA, partial cds Hs.293815 AA699611	1	-0.82	1.17	-1.39		0.56	-0.77	-1.13	-0.92	0.42	0.8	-1.02	-0.6		-1.37	0.58		-0.12	0.94	0.37	0.07	-0.78		-2.03	-1.59	-1.63	-0.99	-1.73	-1.67	-0.63	-0.62	-0.05	-0.6	-1.28	-0.68	0.7	0.13	-1.18	-1.81	-0.58	-0.59	-0.01	-0.2	-0.5	-0.15	-0.78	-0.04
GENE687X	IMAGE:69672	103912 CDH5 cadherin 5, type 2, VE-cadherin (vascular epithelium) Hs.76206 T53625	1	-0.17	0.61	0.02	0.09	0.15	-0.79	-0.33	-0.31	-0.12	0.62	-0.93	-0.46	-0.79	-0.2	0.67	0.08	-0.35	1.13	-0.6	-0.04	-0.18	-1.01	-1.09	-1.12	-1.37	-0.68	-1.09	-0.04	-0.56	-0.25	-0.34	-0.39	-0.73	-0.99	0.04	-0.06	-0.62	-1.02	0.28	0.81	-0.32	-0.11	-0.51	-0.19	0.25	0.73
GENE242X	IMAGE:130541	101409 PECAM1 platelet/endothelial cell adhesion molecule (CD31 antigen) Hs.78146 R22412	1	-0.17	0.35	-0.69	0.15	-0.41	0.22	-0.37	-0.25	0.09	1.09	-1.27	-1.07	-0.75	-0.38	0.48	0.66	-0.46	0.42	-0.3	-0.72	-0.56	-0.85	-0.96	-0.79	-1.07	-1.56	-0.98	-0.47	-0.74	-0.13	0.04	0.1	-0.75	-0.8	0.47	-0.2	-0.5	-1.38	0.04	-0.12	0.3	-0.61	-0.35	0.21	-0.24	0.12
GENE1021X	IMAGE:26418	105908 EDG1 endothelial differentiation, sphingolipid G-protein-coupled receptor, 1 Hs.154210 R13546	1	-0.43	-0.02		-1.29	-0.04	-0.43	-0.56	-0.49	-0.07	0.58	-1.09	-0.93	-0.45	0.04	-0.2	0.11	-0.21		-0.27	-0.59	-0.13		-0.69	-0.74	-0.57	-0.88	-1.2	0.02	-0.45	-0.44	-0.52	-0.32	-0.5	-0.91	0.12	-0.98	-0.03	-0.75	0.04	0.05	0.02	-0.38	-0.37	0.92	-0.72	-0.21
GENE3676X	IMAGE:302127	178306 LCN2 lipocalin 2 (oncogene 24p3) Hs.204238 N79823	1	0.11	0.37	-0.26	-1.11	-0.24	-0.35	-0.5		-0.03		-0.47	-0.49	-0.28	0.71	0.68	-0.44	0.28	0.36	1.09	-0.23	-0.23	-0.11	-0.23	-0.81	-0.66	-0.78	-0.5	-0.29	-0.1	-0.02	0.02	-0.28	-0.49	-1.03	-0.21		-0.11	-0.95	0.04	0.03	-0.36	-0.37	-0.16	-0.08	-0.33	0.35
GENE4770X	IMAGE:491770	226090 C1QR1 complement component 1, q subcomponent, receptor 1 Hs.97199 AA150505	1	-0.04			0.36	0.21	-0.76	-0.46	-0.24	-0.63	0.67	-0.54	-0.34	-0.28	0.59	0.02	-0.17	-0.08	0.98	0.66	-0.16	-0.29	-0.58	-0.08	-0.5		-0.45	-0.93	-1.01	-0.92	-0.24	-0.73	-0.19	-0.67	-1.41	-0.07	-0.07	0.09	-0.99	-0.36	-0.18	-0.11	-0.03	-0.33	-0.08	0.03	-1.26
GENE1359X	IMAGE:838278	107877 RAMP2 receptor (calcitonin) activity modifying protein 2 Hs.155106 AA457474	1	0.2	0.58	-0.07	0	0.04	-0.28	-0.08	-0.08	0.41	0.45		-0.92		-0.33	-0.06		-0.11	0.85	0.99	-0.48	-0.01	-0.45	-1.21	-0.64	-0.82	-0.7	-1.08	-0.78	-0.88	-0.68	-0.74	-0.78	-1.2	-0.88	-0.41	-0.55	-0.39	-0.72	0.02	-0.22	-1.05	-0.55	-0.54	-0.15	0.55	-0.17
GENE2502X	IMAGE:67067	114384 Homo sapiens, clone IMAGE:3140802, mRNA Hs.94795 T70352	1	0.07	-0.38		-0.44	-0.03	-0.41	-0.26	0.23	0.26	0.94	0.73	0.18	-0.88	-0.4	-0.23	0.24	0.75	1.32	1.78	1.19	-0.91	-0.61	-0.76	-1.07	-1.19	-0.26	-1.24	-0.67	-0.69	-0.11	-0.17		-0.41	-1.18	-0.65	0.06	1.62	-1.39	-0.05	0.2	-0.48	0.16	0.26	-0.48	1.07	-0.39
GENE3596X	IMAGE:76182	120803 DKFZP761F241 hypothetical protein DKFZp761F241 Hs.107253 T59665	1	-0.25	-0.3	-0.6	0.53	-0.77	0.03	-0.05	-0.47	0.82	1.2	0.2	-0.33	-0.62	-0.46	-0.97	-0.48	-0.32	0.86	0.74	-0.33	-0.85	-1.21	-0.5	-0.74	-0.62	-0.22	-0.88	-0.91	-1.21	-0.88	0.46	-0.7	-0.17	-1.12	-0.5	-0.35	-0.46	-0.89	-1.03	-0.64	0.34	-0.02	-0.14	0.16	-1.01	0.24
GENE1383X	IMAGE:32576	108027 DKFZP761F241 **hypothetical protein DKFZp761F241 Hs.107253 R20416	1	0.01	0.29	-0.58	-0.52	-0.33	-0.23	0.31	-0.39	1.79	1.41	0.71	-0.15	-0.64	-0.52		-0.44	0.37	0.18	1.06	-0.29	-0.63	-1.46	-1.16	-0.97	-0.59	-0.5	-1.58	-1.05	-0.93	-0.36	-0.09	-1.14	-0.54	-0.38	-0.51	-0.04	0.27	-1.15			0.1	0.1	-0.51	0.21	-0.76	0.62
GENE1516X	IMAGE:490819	108781 GARP glycoprotein A repetitions predominant Hs.151641 AA122287	1	-0.14	0.64	-1.2	0.07	-0.09	-0.65	-0.85	-0.89	0.92	0.78	-0.75	-0.93	-0.85	-0.38			0.07	0.68	-0.29	-1.07	-0.78	-0.38	-0.66	-0.6	-0.95	-0.7	-0.78	-0.78	-0.49		-0.06	-0.67	-0.52	-0.14	-0.34	-0.31	0.08	-1.18	0.31	0.35	1.39	-0.2	0.15	0.14	-1	0.39
GENE3964X	IMAGE:448048	221623 ESTs, Weakly similar to ALU2_HUMAN ALU SUBFAMILY SB SEQUENCE CONTAMINATION WARNING ENTRY [H.sapiens] Hs.93135 AA702809	1	0.06	0.34	0.28	0.78	-0.16	-0.38	-0.09	0.99	-0.02	0.04	-1.53	-1.41	-0.43	-0.43	-1.06	-1.1	0.03	0.45	-0.37	-0.53	-0.96	-1.15	0.06	-0.15	0.4	-1.4	-0.7	-0.33	-0.97	-1.6	-0.7	-0.69	-0.98	-1.28	-0.75	-1.05	0.28	-1.38	0.02	-0.49	-0.1	-0.32	-0.42	0.47	-0.73	0.45
GENE1860X	IMAGE:813838	110755 ESTs, Weakly similar to ALU2_HUMAN ALU SUBFAMILY SB SEQUENCE CONTAMINATION WARNING ENTRY [H.sapiens] Hs.93135 AA447777	1	0.06	-0.05		0.98	0.32	-0.67	-0.4	1.69	0.27	-0.23		-1.31	-1.26	-0.49	-0.71		-0.25	0.49	-0.64	-0.44	-0.66	-1.35		-0.83	-1.24	-1.27	-0.97	-0.95	-1.04	-1.18		-0.97	-1.01	-1.16			0.57	-1.14	0.57	-0.02	-0.2	-0.4	-0.58	0.41	-1.24	0.86
GENE5426X	IMAGE:1620712	309459 FBLN5 fibulin 5 Hs.11494 AI016973	1	-0.29	-0.29	-0.56	-0.28	-0.56	-0.58	-0.44	1.13	-0.49	0.18	-1.1	-1.32	-1.97	-1.04	-1.13		-0.42	-0.09	-1.53	1.6	-0.35	-0.63		-1.7			-1.84	-1.7	-1.9	-1.83	-0.61	-1.16	-1.05	-1.8	-0.58	-0.09		-1.61	-0.03	0.21	-0.33	-0.12	-0.86	-0.82	0.51	0.84
GENE4913X	IMAGE:50483	226876 FBLN5 fibulin 5 Hs.11494 H17615	1	-0.35	0.36	0.14	-0.28	0.2	-0.58	-0.82	0.61	0.42	0.3	-0.46	-2.52	-1.45	-0.64	-0.96	-0.58	-0.83	-0.28	-0.2	1.74	0.06	-1.18		-1.36	-1.43	-1.79	-1.62	-0.84	-1.93	-1.71	-0.53	-0.72	-1.05	-0.76	-0.14	-1.12	-0.39	-1.52	0.16	0.01	0.16	-0.01	-0.4	-0.08	0.88	0.24
GENE1747X	IMAGE:134270	110069 Human hbc647 mRNA sequence Hs.24385 R31110	1	-0.23	-0.07	-0.27	0.72	-0.29	-0.17	-0.24	-0.48	-0.58	-0.16	-0.64	-0.6	-0.56	0.01	-0.33		0.17	0.13	-0.28	-0.07	-0.5	-0.64	-0.9	-0.44	-0.48	-0.29		-0.35	-0.9	-0.8	-0.19	-0.52	-0.34	-0.41	-0.26	-0.78	-0.7	-0.83	-0.56	-0.25	0.3	0.07	0.14	-0.05	-1.11	-0.1
GENE180X	IMAGE:49465	101058 FLJ23056 hypothetical protein FLJ23056 Hs.20914 H16578	1	0.5	-0.1	-0.72			-0.34	-0.01		-0.57	-0.05		-0.35	-0.37	-0.53	-0.8		-0.02	0.79	-0.47	0.01	-0.05	-0.56		-0.44		-0.46	-0.87	-0.23	-0.52	-0.64	-0.39	-0.58	-0.26	-0.36	-0.23	-0.36	-0.52	-0.56	-0.36	-0.01	1.09	-0.06	-0.48	-0.5	-0.12
GENE4384X	IMAGE:486561	223969 PARVA parvin, alpha Hs.44077 AA042953	1	0.23	0.13	-0.4		0.01	0.2	-0.59	-0.07	-1.17	0.21	-0.45	0.28	-0.21	-0.54	-1.9	-0.25	0	0.64	-0.11	-0.26	0.23	-0.21				-0.23	-0.02		-0.38	-0.28	0.11	-0.88	-0.47	0.37	0.44	0.34	0.2	-0.37	0.28	0.32	0.35	-0.98	0.41		-0.55	-1.55
GENE6512X	IMAGE:66574	98981 LOC51304 DHHC1 protein Hs.14896 T67066	1	-0.08	0.04	-0.46	-0.35	-0.1	0.06	-0.36	0.34	-0.59	-0.42		-0.39	-0.65	-0.65	-0.59	-0.66	-0.27	0.31	-0.36	-0.06	0.48	-0.38	-0.15	-0.57	-0.34	-0.51	-0.6		-0.42	-0.45	-0.13	-0.74	-0.15	-0.04	-0.2	-0.1	-0.36	-0.65	0.13	0.31	0.05	-0.43	-0.24	-0.71	-0.64	-0.39
GENE3476X	IMAGE:754550	120030 KIAA1095 KIAA1095 protein Hs.177635 AA406290	1	-0.25		-0.74	-1.23	-0.47	-0.04	-0.15	-0.28	0.68	-0.11	2.2	1.06		0.63	0.92	-0.31	0		-0.28	-0.57	-0.44	0.21		-0.27	-0.48	-0.78		-0.18	-1.06	-0.79	-1.05	-0.93	-0.68	-0.82	0.26	-0.49	-0.28	-0.68	-0.33	0.29	1.01	-0.6	-0.19	-0.92	-1.24	-0.87
GENE798X	IMAGE:361974	104616 PTN pleiotrophin (heparin binding growth factor 8, neurite growth-promoting factor 1) Hs.44 AA001449	1	0.24	0.06	-1.77	0.06	-0.28	0.39	-0.35	0.34	-0.62	0.61	0.41	-0.42	-0.74	-0.12	-1.61	-0.79	-0.19	-0.27	0.57	-0.46	-1.03	-0.18	-0.79	-0.23	-0.61	-1.65	-1.09	0.25	-1.15	-1.19	-0.3	-0.89	-1.08	-0.52	0.04	-0.14	-1	-0.38	-0.49	0.04	-0.37	0.07	-0.12	0.21	2.25	-0.71
GENE6426X	IMAGE:277305	98479 ARHB ras homolog gene family, member B Hs.204354 N41062	1	1.22	0.87	-0.89	-0.74	-0.31	1.21	-0.32	1.71	0.54	0.81	0.2	-1.36	-0.18	-0.44	-0.57	0.76	0.75	0.95	0.77	0.08	0.61	0.18	-0.51	-0.22	0.06	-0.34	-0.78	-0.33	-0.52	-0.37	-0.18	-0.22	-0.56	-0.13	-0.25	0.83	0	-0.3	-0.89	1.31	0.78	0.12	0.31	0.01	0.59	-1.55
GENE4995X	IMAGE:377270	246499	1	1.24	1.18	-0.73	-0.79	-0.27	1.62	-0.35	1.7	0.2	0.35	-0.31	-0.88	-0.84	-0.47	-0.22	0.54	0.69	0.72	0.04	-0.36	0.32	0.18	-0.9	-0.04	0.05	-0.15	-0.77	-0.76	-0.67	-0.59	-0.29	-0.45	-0.83	-0.32	0.03	0.83	-0.4	-0.99	-0.92	1.2	0.8	-0.2	0.06	0.02	0.88	-1.57
GENE2942X	IMAGE:768370	116844 **Homo sapiens cDNA FLJ11796 fis, clone HEMBA1006158, highly similar to Homo sapiens transcription factor forkhead-like 7 (FKHL7) gene Hs.284186 AA495790	1	0.82	0.46	-1.22	-0.87	-0.05	1.43	0.15	1.5	-0.02	0.29	-0.4	-1.1	-0.4	-0.52	-1.12	0.03	0.34	0.7	0.37	-0.77	0.38	-0.14	-0.46	0.21	-0.09	-0.27	-1.75	-0.76	-0.93	-0.58	-0.51	-0.9	-1.04	-0.2	-0.25	1.16	-0.46	-0.37	-1	1.16	-0.01	-0.35	0.26	-0.07	0.78	-1.94
GENE2213X	IMAGE:1492448	112800 ARHB **ras homolog gene family, member B Hs.204354 AA878590	1	1.07	0.53	-1.27	-0.73	-0.16	1.33	-0.62	1.79	-0.07	0.42	-0.31	-1.15	-0.7	-0.55	-0.98	0.22	0.38	0.85	0.34	-0.75	0.42	-0.42	-0.57	0.5	0.31	0.3	-1.67	-0.94	-1.12	-0.77	-0.83	-1.2	-1.16	-0.29	-0.36	1.5	-0.47	-0.86	-1.18	1.34	0.04	-0.41	0.05	-0.17	0.85	-1.76
GENE60X	IMAGE:253141	100283 ARHB ras homolog gene family, member B Hs.204354 H88963	1	0.85	0.65	-1.17	-0.79	0	1.01	-1.09	1.69	0.16			-1.52	-0.57	-0.17	-0.87	0.27	0.63	0.79		-0.85	0.16	0.45	-0.32	0.28	0.01	-0.47	-1.8	-0.67	-1.04	-0.46	-0.83	-1.37	-1.1	-0.62	-0.23	1.07	-0.27	-0.59	-1.08	1.24	-0.16	-0.55	-0.12	-0.35	0.75	-1.81
GENE5899X	IMAGE:143426	313992 ARHB ras homolog gene family, member B Hs.204354 R74467	1	0.69	0.49	-1.19	-0.78	-0.15	1.24	-0.88	1.71	-0.91	0.13	-0.43	-1.14	-0.83	-0.43	-0.96	0.1	0.71		0.75	-1.2	0.22	0.16		0.17	-0.02	-0.67	-1.61	-0.69	-1.11	-0.38	-1.02	-1.4	-1.39	-0.43	-0.14	1.29	-0.52		-0.67	1.11	-0.83	-0.69	-0.02	0.19	1.11	-1.51
GENE4653X	IMAGE:506497	225560 Homo sapiens cDNA: FLJ22356 fis, clone HRC06345 Hs.20733 AA708621	1	0.13	0.25	-0.63	-1.07	-1.24	-0.43	-1.05	-0.27	0.05	0.39	-0.59	-0.29	-0.35	-0.38	-1	-0.88	0.14	0.68	-0.18	-0.26	0.22	-0.57	0.46	1.06	-0.2	-0.55	-0.2	-0.4	-0.95	-0.87	-0.82	0.05	-1.03	1.84	-0.04	1.31	0.62	0.41	-0.32	0.41	0.11	0.35	-0.91	-0.76	-0.05	-1.46
GENE1905X	IMAGE:916574	110988 AA573624	1	-0.03	0.23		-0.14	-1.11	0.5	-0.92			0.53		-1.12	-0.74	-0.6	-1.5	0.4	0.74	0.96		-0.41	0.01	-0.77	-0.46	0.16	-0.64	-1.58	-1.15		-1.37	-0.9	-0.25	-0.02	-0.72	0.15	-0.14	0.69	0.4	-0.26	-0.55	0.53	-0.15	0.01	0.18	-0.58	1.09	-0.64
GENE4969X	IMAGE:1926969	228987 MMP23B matrix metalloproteinase 23B Hs.211819 AI347985	1	-0.31	0.15	-0.52	0.24	-0.17	0.02	-0.9			0.09	-0.5	-0.65	-0.08	-0.32	-0.91		-0.46		0.04	-0.23	-0.77	-0.31	-0.22	-0.34	-0.38	-0.7	-0.55	-0.36	-0.2	-0.28		-0.55	-0.12	0.07		-0.82	0.24	-0.3	-0.28	-0.46	-0.53	-0.42	0.27	-0.23	0.13	-0.04
GENE6238X	IMAGE:1930639	318583 EST, Moderately similar to MIFR-1 [H.sapiens] Hs.156173 AI334253	1	-0.2	0.42	0.02	-0.08	0.06	0.08	-0.68	-0.66		0.5		-0.42	-0.46	-0.61	-0.82	-1.38	-0.26	0.14	0.25	-0.44	-0.56	-0.25	-0.09	-0.14	-0.33	-0.07	-0.52	-0.79	0.01	-0.01	-1.39	-0.57	-0.12	-0.31	-0.44	0.1	-0.35	-0.46	-0.39	-0.47	-0.5	-0.3	-0.11	-0.38	-0.01	-0.18
GENE4897X	IMAGE:503078	226780 MMP23B matrix metalloproteinase 23B Hs.211819 AA151428	1	-0.61	-0.16		-0.11	0.09	-0.57	-0.64	-0.71	-1.3	-0.13		-0.26	-0.51	-0.7	-1.01	-1.67	-0.92	0.13		0.56		-0.3				-0.19	-0.28	-1.03	-0.26	0.38	-0.39	-0.95	-0.24	-0.25	0.36	0.47	0.78		0.58	-0.05	-0.41	-0.33	-0.57	-0.47	-0.11	-0.22
GENE3816X	IMAGE:1055489	220664 MMP23A matrix metalloproteinase 23A Hs.252876 AA626131	1	-0.5	0.22	-0.57	0.46	-0.06	-0.35	-0.38	-0.26	-0.83	-0.02		-0.23	-0.79	-0.89	-0.57		-0.44	-0.24	-0.47	0.41	-0.57			-1.27		-0.24	-1.34	-1.07	-0.11	0.33	-0.97		-0.44	-0.95	0.1	1.02	0.74	-0.87	-0.59	0.02	-0.31	-0.29	-0.68	-0.91	-0.36	-0.62
GENE3858X	IMAGE:451753	220923 Homo sapiens mRNA; cDNA DKFZp434C1915 (from clone DKFZp434C1915); partial cds Hs.46531 AA706788	1	0.29		-0.8		-1.26	-0.89	-0.3	-0.34	0.1		-1.41	-1.12	-1.73	-1.48	-0.77		-0.54		-0.1	-1.57	-1.05			-0.9	-0.83	-0.85		-0.92	0.77	0.06	-1.51	-1.41	-1.33	-0.38	-0.22	-0.32		-0.87	-1.21	0.95	-0.43	-1.1	-0.62	0.59	-1.01	-0.77
GENE2359X	IMAGE:795758	113575 DKFZP434B044 hypothetical protein DKFZp434B044 Hs.262958 AA460304	1	0.15	-0.41	-1.28	-0.62	-0.11	-0.91	-0.21	0.03	0.39	0.39	-1.16	-0.72	-0.55	-0.32	-1.68	-0.33	0.05	0.24	-0.04	-0.94	-0.68	-0.18	-0.51	-0.25	-0.02	-0.09	-0.75	-0.44	-0.97	-1.35	-0.6	-0.29	-0.59	-0.64	0.38	0.09	-0.33	-0.4	-0.15	0.19	-0.1	-0.01	-0.52	-0.07	-0.75	-0.96
GENE4627X	IMAGE:471755	225446 ESTs, Weakly similar to I38022 hypothetical protein [H.sapiens] Hs.11924 AA035077	1	-0.06	0.1	-1.23	-0.2	-0.36	-0.59	-0.39	-0.56	-0.17	0.19	-0.55	0.52	-0.34	-0.8	-0.97	0.65	-0.49	-0.3	-0.02	-0.78	-0.24	0.28		-0.1		-0.23	-0.47	-0.32	-0.34	-0.4	-0.8	-0.15	-1.33	1.5	0.21	0.25		-0.31	-0.09	0.75	0.69	-0.56	-0.38	-0.74
GENE2055X	IMAGE:357628	111898 ESTs Hs.177387 W94017	1	0.2	0.3	-1.54	-0.04	-0.46	-0.26	-0.05	-0.38		0.72	0.26	-0.2	-0.83	0.03		-0.63	0.39	0.46	0.69	0.08	-0.89	-0.73	-1.26	-0.59	-0.43	-1.03	-1.51	-1.04	-0.22	-0.21	-0.1		-0.58	-0.25	-1.05	0.45	-0.4	-1	0.12	0.12	-0.14	0.22	-0.46	-0.37	-1.06	-0.67
GENE5007X	IMAGE:25154	249100	1	0.31	-0.4	-1.22		-0.28	-0.13	-0.22				0.75	-0.22	-0.74	0.4	-1.46		0.09		0.32	0.73	0.01	-0.52	-0.99	-0.39	-0.15	-0.63	-0.6	0.18	-1.24	-0.34	-0.72	-1.18	0.05	-0.96	-0.25	1.72	0.66	-0.52	-0.68	0.64	-0.3	0.54		-0.55	-0.69	-0.88
GENE2593X	IMAGE:813841	114914 PLAT plasminogen activator, tissue Hs.274404 AA447797	1	0.32	-0.39	-1.46	-0.09	-0.42	-0.21	-0.41	-0.73	0.02	0.54	1.17	0.11	-0.57	-0.17	-1.45	-1.43	-0.17	0.03	0.35	0.96	0.21	-0.31	0.02	0.22	-0.31	-0.69	-1	0.17	-1.03	-0.52	-0.89	-0.98	-0.26	-1.58	-0.8	2.14	0.66	-0.54	0.32	0.74	0.21	0.34	-0.68	-0.82	-0.95	-2.36
GENE2300X	IMAGE:80643	113235 RBM8A RNA binding motif protein 8A Hs.10283 T57803	1	-0.11	-1.05	-1.96	0.37	-0.35	-0.25	0.21	0.74	-0.3	0.42	0.79	-0.31	-0.13	0.36	-0.7	-0.78	0.06	0.61	0.59	-0.13	-0.24	-0.31	-0.47	0.08	-0.08	-0.52	-0.64	-0.23	-0.31	-0.22	-0.76	-0.87	-0.06	-1.12	-0.96	0.76	0.03		-0.22	0.15	0.5	0.82	-0.01	-1.31	-1.38	-1.24
GENE875X	IMAGE:760299	105080 DKK3 dickkopf homolog 3 (Xenopus laevis) Hs.4909 AA425947	1	0.58	0.1	-1.6	0.13	-0.15	-0.59	-0.26	0.35	0.39	1.3	0.97	0.99	-1.24	0.38	-1.46	-0.42	-0.15	0.81	1.27	0.12	-0.61	0.36	0.24	-0.01	-0.13	-0.47	-1.03	-0.04	-1.35	-0.47	0	-0.52	-0.7	-0.78	-0.39	0.35	0.23	-0.64	0.32	0.74	1.24	-0.06	0.26	-0.94	-1.44	-1.85
GENE1981X	IMAGE:687625	111513 Homo sapiens clone HH409 unknown mRNA Hs.216381 AA235347	1	-0.69	0.56	-0.51	-0.61	-0.12	-0.55	0.59	0	-0.24	0.07	-1.42	0.54		-0.33	-0.9	-1.4	0.01	0.01	-0.27	-1.04	-0.32	-0.16	0.22			-0.68	-1.02	0.24	-1.34	-1.35	-0.74	-0.16	-0.92	-0.15	0.55	0.16	0.06	-0.14	0.71	0.83	0.17	-0.3	0.26	-0.22	-0.55	-1.53
GENE4518X	IMAGE:502814	224679 TPST1 tyrosylprotein sulfotransferase 1 Hs.17279 AA126919	1	-0.02		-1.25	0	-0.13	0.84	0.51	0.64	-0.01	0.3		0.08	-0.64	-0.56	-1.93	-1.14	-0.44	-0.16	0.18	-0.44	0.49	-1.09	-1.24	-0.51	0.02	-1.42	-0.83	-0.65	-1.4	-0.95	-0.56	-0.3	-0.81	-1.02	0.11	0.44	0.3	-0.58	-0.1	0.25	-0.27	-0.58	-0.48	-0.25	0.37	0.34
GENE2830X	IMAGE:838446	116272 FLJ23462 duodenal cytochrome b Hs.31297 AA457501	1	0.2	-0.07	-0.08	-0.19	-0.11	-0.61	0.06	-0.14	-0.5	1.18	0.39	-1.07	-1.09	-1.37	-1.65	-1.41	-0.61	-0.99	-0.3	-1.14	-0.47	-1.39		-1.23	-0.68	-0.63	-2.02	-0.8	-1.19	-2.12	-1.63	-1.15	-0.02	-1.11	-0.5	0.01	-0.38	-0.84	0.02	0.47	-0.27	-0.24	0.04	-0.13	-0.41	-0.23
GENE4154X	IMAGE:855557	222667 PKIG protein kinase (cAMP-dependent, catalytic) inhibitor gamma Hs.3407 AA664210	1	0.31	-0.31	-1.26	-0.34	-0.23	-0.09	0.71	1.07	0.4	1.19	1.52	0.53		-0.56	-0.47	-0.89	0.02	0.04	0.71	-0.09	-0.54	-1.21	-0.91	-0.11	-0.3	-1.53	-0.89	-0.5	-1.04	-0.64	-1.25	-1.29	-0.45	-1.12	-0.19	0.42	-0.73	-0.67	-0.41	0.54	-0.05	-0.85	-0.36	-0.49	0.44	-2.28
GENE120X	IMAGE:823871	100661 SPARCL1 SPARC-like 1 (mast9, hevin) Hs.75445 AA490471	1	0.72	1.3	-0.48	0.97	0.26	0	0.2	0.36	0.19	-0.31	-1.68	-1.23	-2.25	-1.83	-0.03	-0.67	-0.16	0.38	-1.37	-0.75	0.82	-0.65	-1.99	-1.37	-1.37	-1	-1.78	-1.43	-1.31	-2.58	-1	-0.47	-2.69	0.08	0.93	0.7	-0.22	-1.22	-0.06	1.13	0.21	0.42	-0.01	-0.82	0.78	-1.16
GENE1386X	IMAGE:377671	108042 ITGA7 integrin, alpha 7 Hs.74369 AA055979	1	-0.17	0.87	-0.38		-0.25	-1.1	-0.49	-0.22	0.37		0.5	-0.32	-0.36	-0.83		-0.71	-0.29		0.96	-0.9	-0.55	-0.28	-0.94	-1.05	-0.31	-1.18	-1.16	-1.01	-0.69	-0.38	-0.82	-0.95	-0.99	-0.27	0	-0.63	0.29	-1.53	-1.11	0.14	-0.62	-0.19	-0.11	-0.15	1.87	-0.93
GENE5541X	IMAGE:1586172	310184 MRE11A MRE11 meiotic recombination 11 homolog A (S. cerevisiae) Hs.20555 AA974008	1	-0.15	0.19				-0.05	0.14	1.32				-1.08	-0.98	-0.79	0.13		-0.6		0.04	-0.46	-0.75	-1.19	-1.46	-1.06	0.23	-1.79	-1.27	-1.7	-1.14	-1.09	-0.84	-1.02	-0.86	-0.33	-0.82	-0.73	-0.69	-1.2	-1.03	-0.49	-0.82	-0.52	0.07	-0.68		-0.6
GENE5190X	IMAGE:1475803	307888 COX7A1 cytochrome c oxidase subunit VIIa polypeptide 1 (muscle) Hs.114346 AA872125	1	0.46			-0.23		-0.34		0.19			-0.58	-0.5	-0.07	-0.54	-0.82		0		-0.39	-0.44	-0.78	-0.52	-0.72	-0.71	-0.85	-1.33	-1.18	-0.93	-1.5	-0.73	-0.69	-1.17	-1.17	-0.89	-0.27	-0.13	-0.37	-1.03	-0.26	0.35	0.04	-0.48	-0.42	-0.9
GENE2620X	IMAGE:428100	115100 SFRP1 secreted frizzled-related protein 1 Hs.7306 AA002080	1	1.6	1.43	-0.88	-0.22	-0.27	-0.87	-0.92	-0.91	-1.46	0.51		-1.01	-0.91	-1.35	-1.34	-1.6	-0.61	-1.96		-0.99	0.32	0.12	-1.06	-0.6	0.37	-1.72	-1.75	-0.81	-0.97	-1.27	-1.27	-1.37	-1.46	-0.92	0.58	0.4	-0.47	-0.84	-0.19	0.53	-0.54	-0.63	-1.39	-0.6	-0.8	-0.75
GENE859X	IMAGE:204686	104972 FXYD1 FXYD domain containing ion transport regulator 1 (phospholemman) Hs.160318 H57136	1			-0.38		-0.4	-0.6	-0.47	-0.24			-0.88	-0.41	-0.5	-0.32	-0.71		-0.07		-0.25	-0.46	-0.6	-0.5	-0.91	-0.29	-0.45	-0.91	-0.54	-0.73	-0.54	-0.67	-0.71	-0.72	-0.89	-0.2	-0.11	-0.39	-0.24	-0.51	-0.62	-0.33	-0.54	-0.51	-0.25	-0.22		-0.32
GENE1898X	IMAGE:75644	110952 TNXB tenascin XB Hs.169886 T58430	1	0.46	0.79	-0.76	0	0.03	-0.95	-1.26	-1.64	-1.06	-0.28	-1.73	-1.45	-1.29	-1.02	-1.31		-0.56		-0.86	-1.02	0.01	-0.6	-1.87	-1.09		-1.74	-1.68	-1.47	-1.5	-1.05	-1.49	-1.42	-1	-0.23	-0.91	-0.84	-0.88	-1.29	-0.44	-0.25	-0.55	-0.44	-1.76	-0.99	-0.37	-0.08
GENE3180X	IMAGE:82556	118215 POR P450 (cytochrome) oxidoreductase Hs.167246 T73294	1	0.47	0.4	-0.25	-0.38	-0.19	-0.49	-0.82	0.79	0.39	-0.11	0.19	-0.54	-0.13	-0.09	-0.51	-0.28	0.07	-0.09	0.48	-0.11	-0.14	-0.79	-1.26	-0.17	-0.62	-0.72	-0.67	-0.68	-0.86	-0.51	-0.99	-0.62	-0.78	-0.63	-0.79	-0.42	-0.53	-0.46	-0.23	-0.23	-0.25	0.02	-0.6	-0.42	-0.72	-0.12
GENE6261X	IMAGE:1566648	319001 ESTs, Moderately similar to G Chain G, Structure Of The Yeast Actin-Human Gelsolin Segment 1 Complex {SUB 52-176 [H.sapiens] Hs.134866 AI091627	1	0.34	0.21	-0.81	-0.48	-0.59	-0.56	-0.43		-0.14		-0.32	-0.9	-0.81	-0.08	-0.9		0.52		-0.05	-0.91	-0.87	0.01	-1.42	-0.57	-0.69	-0.04	-0.61	-0.88	-0.52	-0.82	-1.33	-0.84	-0.55	-0.38	-0.55		0.6	-0.58	-0.93	0.17	-0.33	-0.27	-0.18	-0.6	-0.33	-0.86
GENE1927X	IMAGE:214990	111095 GSN gelsolin (amyloidosis, Finnish type) Hs.290070 H72027	1	0.65	-0.2	-1.2	-0.27	-1.08	-0.92	-0.42	-0.41	-0.41	0.13	-0.18	-1.23	-1.23	-0.36	-1.23	-0.41	1.23	0.11	0.15	-1.28	-1.5	-0.02	-1.63	-0.42	-0.82	-0.57	-0.95	-0.87	-0.8	-0.55	-1.49	-1.11	-0.78	-0.68	-0.67	0.51	0.95	-1.01	-1.32	0.42	-0.54	-0.51	-0.13	-0.94	-0.43	-0.9
GENE1753X	IMAGE:79216	110087 AHNAK AHNAK nucleoprotein (desmoyokin) Hs.301417 T57765	1	0.25	-0.17	-0.41	-0.15	0.18	-0.26	-0.23	0.14	-0.34	-0.29	-0.94	-1.93	-1.24	-1.34	-1.84	-0.12	0.52	0.75	0.05	-0.77	-0.26	-0.61	-0.46	0.15	-0.19	0.21	-0.97	-0.9	-0.19	-0.1	-1.78	-1.02	-1.41	0.22	-0.46	0.13	0.25	0	-0.45	0.25	-0.48	-0.12	-0.28	-0.99	-1.17	-1.08
GENE1464X	IMAGE:1439157	108465 MS4A8B membrane-spanning 4-domains, subfamily A, member 8B Hs.26638 AA829284	1	-0.15	-0.09	-1.1	-0.21	-0.11	-0.99	-0.96	0.01	-0.97	-0.44	-0.93	0.45	-0.98	-0.49	-0.42	-1.18	0.11	-0.3	0.47	-0.99	-0.39	0.14	0.21	0.01	-0.48	-0.61	-1.4	-0.47	-0.36	-0.44	-1.64	-0.61	-1.12	-1.28	-0.09	0.29	-0.15	-0.59	-1.03	0.49	-0.16	0.44	-0.38	-0.27	-0.94	-0.37
GENE1371X	IMAGE:927667	107955 AA536013	1	-0.09	0.2		-1.31	-0.27	-0.41		-0.14	-0.31	-0.11		-1.41	-1.35	-0.65	-0.99	-0.89	0.13	0.25		-0.71	-0.26	-0.7	-0.5	0.07	-0.94	-1.54	-1.38	-0.47	-0.91	-0.82	-1.48	-1.19	-1.01	-1.7	-0.95	0	-0.48	-0.7	-0.34	0.03	-0.6	-0.45	-0.87	-0.85	-0.82	-0.61
GENE5150X	IMAGE:2056139	307626 RIL LIM domain protein Hs.79691 AI334917	1	0.31	0.17	-1.6	-0.39	-0.04	-0.69	-0.32	0.24	0.55	-0.36	0.08	-0.28	0.44	-0.64	-1.06	-0.64	-0.54	-0.5	0.05	-0.64	-0.11	0.16		-0.12	-0.28	-0.41	-0.59	0	-1.2	-1.09	-1.3	-0.74	-0.63	-0.99	0		0.93	-0.51	-0.06	0.45	-0.07	-0.94	-0.5	-0.48	0.53	-1.06
GENE4263X	IMAGE:1572196	223266 SMOC2 secreted modular calcium-binding protein 2 Hs.22209 AA931725	1	-0.24	0.61	-0.92	-0.48	-0.2	-0.93	-0.68	1.2	-0.13	-1.07	2.58	2.02	-0.82	-0.17	-1.32	-1.64	0.17		-0.67	-0.52	0.32	0.02		-0.41	-0.74	-1.34	-0.97	2.56	-1.44	-1.28	-1.19	-1.24	-1.98	-0.59	0.07	-0.83	-0.19	-1.56	-0.21	0.36	0.39		-0.48	-1.18	-2.47	-1
GENE5993X	IMAGE:1560599	315299 Homo sapiens mRNA; cDNA DKFZp564P016 (from clone DKFZp564P016) Hs.132571 AA947186	1	0.43	0.43	-1.47	-0.51	-0.14	-1.28	-0.48	-0.26	-0.13	0.66	0.18	-0.72	-0.68	-0.46	-1.47	-0.78	0.02	-0.18	1.07	0.13	0.18	-0.7	-0.68	-0.48	-0.36	-1.09	-0.61	0.27	-1.33	-0.49	-1.35	-1.15	-0.8	-1.42		-0.74	-0.93	-0.71	0.35	1.1	-0.15	-0.19	-0.68	-1.4	-1.12	-1.3
GENE220X	IMAGE:45542	101312 Homo sapiens, clone IMAGE:4183312, mRNA, partial cds Hs.180324 H08560	1	0.48	0.46	-1.22		-0.42	-0.64	0.16	0.43	-0.04	1.05	-0.28	-0.61		-0.66	-2.05	-0.57	-0.57	-0.08	-0.3	-0.41	1.15	-0.95	-1.37	-0.5	-0.41	-0.99	-1.01	-0.11	-0.83	-1.44	-1.2	-0.41	-0.83	-0.91	-0.06	0.14	0.46	-0.98	-0.16	0.91	-0.02	-0.21	-0.08	-0.33	-1.43	-1.23
GENE1758X	IMAGE:489384	110120 AA054451	1	0.69	0.6	-1.48	-0.53	-0.35	-0.94	-0.78	0.42	-0.07	1.06		-0.44	-1.76	-0.45	-2.84	-0.93	-0.39	0.15		-0.81	0.88	-0.25	-0.88	-0.19	0.1	-0.87	-0.82	-0.6	-1.46	-1.59	-1.65	-0.63	-1.45	-1.32	-0.05	0.39	1.11	-1.03	0.21	0.28	-0.04	-0.95	-0.16	-0.99	-1.89	-1.32
GENE1568X	IMAGE:138265	109049 IL1R1 interleukin 1 receptor, type I Hs.82112 R56687	1	0.14	0.66	-0.41	-0.42	0.49	-0.74	-0.52	-0.2	0.76	0.18		-0.17	-0.9	-0.51	-1.82	-0.7		0.12		-0.37	-0.61	-0.72		0.1	-0.22	-0.45	-1.85	-0.04	-1.47	-1.6	-0.9	-0.61	-1.36	-1.86	0.6	0.17	0.16	-0.19	0.41	0.23	-0.46	0.02	-0.44	-0.05	-0.67	-0.66
GENE3146X	IMAGE:810213	118034 IL1R1 interleukin 1 receptor, type I Hs.82112 AA464525	1	-0.11	0.55	-0.43	-0.52	0.47	-0.58	-0.31	-0.52	0.88	0.53	-0.26	-0.53	-0.62	-0.15	-1.45	-0.69	-0.15	0.04	-0.16	-0.43	-0.76	-1.43		0.01	-0.39	-0.54	-0.71	0.31	-1.01	-0.92	-0.63	-0.41	-1.05	-1.62	0.52	0.1	-0.05	-0.34	0.31	0.5	-0.18	-0.02	-0.53	-0.09	-0.66	-0.61
GENE2047X	IMAGE:83549	111845 C1R complement component 1, r subcomponent Hs.1279 T69603	1	0.57	0.08	-0.81	0.11	-0.64	-1.04	-0.26	0.18	-0.05	0.54	-1.51	-0.83	-0.74	-0.26	-2.13	-0.69	0.38	-0.28	-0.21	-1.29	0.05	-0.96	0.23	-0.14	0.4	-0.72	-0.96	-0.2	-1.5	-1.77	-0.91	0.02	-1.01	-0.21	0.13	-0.54	-0.06	0.01	0.48	0	0.39	-0.86	-0.15	-0.2	1.26	-1.51
GENE328X	IMAGE:376416	101922 C1R complement component 1, r subcomponent Hs.1279 AA041382	1	0.66	0.46	-0.94	0.22	-0.12	-1.09	-0.49	-0.1	-0.16	0.45		-1.5	-0.98	-0.2	-2.2	-0.46	0.29	-0.12		-1.02	-0.27	-0.44	-0.22	-0.27	-0.07	-0.8	-1.41	-0.22	-1.72	-1.59	-0.95	-0.04	-1.08	-0.01	-0.25	-0.19	-0.02	-0.45	0.47	0.35	-0.06	-0.82	-0.16	-0.34	1.1	-1.16
GENE121X	IMAGE:377346	100666 C1S complement component 1, s subcomponent Hs.169756 AA055520	1	0.64	0.23	-0.55	0.34	0.17	-1.56	0.07		0.33	0.44		-0.99	-1.51	-0.51	-1.98	0.11	0.11	0.37		-0.46	0.49	-0.93	-1.03	-0.99	-0.8	-1.07	-1.41	-0.58	-2.24	-2.2	-1.08	-0.26	-1.23	-0.8	-0.32	0.86	0.31	0	0.62		-0.15	-0.53	-0.32	-0.74	1.81	-0.69
GENE2762X	IMAGE:85634	115931 C1S complement component 1, s subcomponent Hs.169756 T62048	1	0.14	0.03	-0.53	0.25	-0.04	-0.79	-0.13		0.49		-0.17	-0.76	-1.01	-0.23	-1.32		0.41	0.31	-0.24	-0.51	-0.18	-0.46	-0.71	-0.57	-0.67	-0.82	-1.07	-0.54	-0.8	-0.95	-0.44	0.02	-0.66	-1.11	0.49	0.17	0.01	-0.53	0.06	0.65	-0.05		-0.18	-0.42	1.94	-0.81
GENE388X	IMAGE:2407433	102254 DPYSL3 dihydropyrimidinase-like 3 Hs.74566 AI831083	1	0.32	0.02	-1.36	-0.17	-0.19	-0.5	-0.65	0.66	1.06	0.62		-1.36	-0.49	-0.34	-1.81	-0.86	1.13	-0.4		-0.31	-1.14	-0.37	-0.75	-0.65	0.51	-0.33	-1.09	-0.7	-0.34	-0.63	-1.77	-1.36	-1.26	-0.69	0	1.01	0.02	-0.92	0.04	1.54	-0.09	-1.48	-0.12	-0.1	-0.5	-1.22
GENE788X	IMAGE:298104	104492 DZIP1 zinc-finger protein DZIP1 Hs.60177 N70759	1	-0.05	0.07	-0.61	-0.6	-0.47	-0.24	-0.46	1.6	0.1	0.39	1.62	-0.16	-0.66	-0.13	-1.69	-1.9	-0.12	-0.52	-0.39	-0.86	-1.07	-0.04	-0.07	-0.44	-0.04	-1.13	-1.25	-0.41	-0.44	-0.43	-0.83	-0.72	-1.1	-1.34	0.09	0.36	0.25	-0.15	0.15	0.88	-0.02	-0.3	-0.23	-0.27	0.3	-1.29
GENE26X	IMAGE:307174	100141 PPP1R12B protein phosphatase 1, regulatory (inhibitor) subunit 12B Hs.130760 N91797	1	0.19	0.76	-0.61	-0.79	-0.4	-0.58	-0.54	0.21	-0.08	0.44	0.07	-1.07	-0.49	-0.22	-0.1	-0.85	0.2	0.25	-0.41	-0.48	-0.13	-0.41		-0.14	-0.09	0.3	-0.61	0.14	-1.33	-0.5	-0.57	-0.5	-0.36	0.06	0.35		0.14	-0.63	0.23	0.11	-0.37	-0.28	0.29	-0.33	0.02	-0.44
GENE2458X	IMAGE:731311	114184 PTPRC protein tyrosine phosphatase, receptor type, C Hs.170121 AA416767	1	0.07	0.53	-0.27	-0.56	0.44	-1.54	-0.3	-0.46	-0.01	0.82	-0.89	-0.87	-0.03	0.14	-0.55	-1.03	0.34	-1.5	-0.65	-0.28	-0.21	-0.08	0.11	-0.37	0.32	-0.12	0.16	0.02	-0.52	-0.41	-1.28	-0.31	-1.64	-0.6	0.37	-0.53	0.5	-0.41	-0.01	0.28	-0.43	0.24	-0.85	0.03	0.12	-0.01
GENE226X	IMAGE:809719	101336 PTPRC protein tyrosine phosphatase, receptor type, C Hs.170121 AA455496	1	0.36	0.59	-0.58	-0.13	0.5	-1.47	-0.47	-0.37	-0.4	0.44	-0.65	-0.74	0.17	0.17	-1.22	-1.46	0.22	-1.23	-0.86	-0.83	-1.22	-0.77	0.25	0.21	-0.32	0.3	-0.66	0.3	-0.15	-0.92	-2.24	-0.69	-1.61	-0.98	0.36	-0.02	0.43	-0.44	-0.02	0.41	-0.29	-0.58	-0.7	0.04	-0.08	-0.06
GENE436X	IMAGE:753982	102526 ESTs Hs.7882 AA478747	1	0.31	0.36	-0.1	0.37	0.3	-0.83	-0.28	-0.77	-0.13	0.33	-1.1	-1.17	-0.5	-0.13	-0.89		0.05		-0.65	-0.65	-1.21	-1.13	-0.81		-0.56	-0.41	-0.86	-0.72	-0.99	-1.02	-0.85	-0.98	-1.19	-0.92	0.35	-0.55	-0.59	-1.02	0.73	0.43	-0.22	-0.75	-0.88	0.07	-0.18	-0.04
GENE420X	IMAGE:502155	102456 PTGIS prostaglandin I2 (prostacyclin) synthase Hs.302085 AA126676	1	0.09	0.88		-0.31	0.3	-1.14	-0.74	0.85	-0.67	-0.75	-0.91	-1.22	-0.65	-0.62			-0.26		-0.8		-0.63	-1.21		-0.57	-0.61	-0.87		-0.47	-1.47	-0.99	-1.51	-1.5		-0.85	-0.1	-0.79	-0.14	-1.62	-0.37	-0.11	-1.16	-1.46	0.58	-0.34	-0.43	-0.47
GENE5590X	IMAGE:1912578	310534 PTGIS prostaglandin I2 (prostacyclin) synthase Hs.302085 AI304790	1	0.38	0.33			0.3	-0.72	-0.52	0.07	-0.78	-0.36		-1.4	-0.41	0.08	-1.05		-0.09			-1.01	-0.52	-0.21		-0.16	-0.02	-0.73	-0.87	-0.46	-0.95	-1.03	-1.49	-1.2	-0.3	-1.22	0.38	-0.66	0.33	-1.03	-0.08	0.11	-1.05	-0.88	1.72	-0.37		-0.31
GENE1237X	IMAGE:772437	107266 KIAA0638 KIAA0638 protein Hs.77864 AA405486	1	0.24		-0.28	-0.45	-0.29		0.26	0.04		0.82	0.68	-0.97	-0.52	0.02	-0.57		0.72	-0.05	0.21	-0.68	-0.76	-1.2	-0.75	-0.47	-0.19	-0.84	-0.76	-0.42	-1.32	-0.52	-0.48	-0.46		-0.1	0.11	0.87	0.09	-1.11	-0.29	0.18	-0.43	-0.02	-0.35	-0.21	-0.37	-0.92
GENE5185X	IMAGE:814259	307840 SSPN sarcospan (Kras oncogene-associated gene) Hs.183428 AA458998	1	-0.26	-0.3	-0.28	-0.05	-0.47	-0.64	0.26	0.81	-0.71	0.09	-0.79	-0.51	-1.14	-0.51	-1.14		0.38	0.36	-0.73	-1.21	-0.77	0.03	-0.58		-0.05		-1.11	-0.5	-1.36	-0.93	-0.93	-0.18	-0.82	0.33	0.31	0.82	-0.37	-0.73	-0.06	0.77	0.57	-0.88	0.05	-0.21	-1.12	-1.02
GENE3836X	IMAGE:281190	220805 ESTs Hs.30627 N50976	1	-0.18	-0.46	-0.66	0.61	-0.62	-0.68	0.38	0.74		0.67	-0.33	-0.61	-0.22	-0.61	-1.02		-0.03		-0.36	-0.72	-0.47	-0.45	-0.42	-0.29	-0.45	-0.19	-0.55	-0.6	-1.02	-1.04	-1.01	-0.22	-0.85	-0.26	-0.32	0.28	-0.37	-0.36	-0.56	0.7	0.48	-0.74	-0.29	-0.53	-0.26
GENE1796X	IMAGE:782701	110328 ESTs, Weakly similar to FMOD_HUMAN FIBROMODULIN PRECURSOR [H.sapiens] Hs.32244 AA447610	1	-0.23	0.82	-1.14	-0.34	0.13	-0.67	-0.94	-1.29	0.5	0.74	0.34	-1.31	-1.11	-0.69	-1.34		-0.24		-0.15	-0.65	-1.05	-1.43	-1.29	-0.91	-0.88	-1.09	-1.51	-1.44	-1.13	-0.97	-0.45	-1.14	-0.93	-0.14	0.41	-0.54	-0.38	-1.34	0.3	0.5	0.82	0.16	-0.01	-0.57	-1.03	-0.09
GENE3959X	IMAGE:489509	221589 Homo sapiens mRNA; cDNA DKFZp564L0822 (from clone DKFZp564L0822) Hs.28264 AA099148	1	0.09	0.23	0	0.08	-0.53	-1.13	-0.56		-0.14	0.28	-0.32	-1.19	-0.43	-0.83	-0.97	-1.38	-0.26	0.17	-0.04	0.24	-0.39	0.61	-0.68	-0.35		-1.03	-0.4	-0.33	-0.89	-1.26	-0.98	-1.07	-0.75	-0.81	-0.14	0.23	0.19	-1.08	0.37	0.45	0.51	-0.22		-0.38	0.6	-0.55
GENE4892X	IMAGE:284383	226747 ESTs Hs.47447 N52151	1	-0.29	0.58	-0.07	-0.92	-0.82	-0.76	-0.54	-1.01	-2.03			-1.39	-1.44	-1.11	-1.1		-0.52		-1.35	-1.16	-0.27	-0.15		-0.43	-0.89		-0.62	-0.62	-1.58	-1.82	-1.79	-1.38	-1.05	0.17	-0.04	-0.23	-0.39	-1.21	-0.72	0.44	0.23	-1.28	-0.01	-0.31	-0.04	-3.09
GENE6414X	IMAGE:609332	98404 COL14A1 collagen, type XIV, alpha 1 (undulin) Hs.36131 AA167222	1	-0.02	0.72	-0.64	0.72	-0.4	-0.7	-0.02	-0.21	-0.7	-0.33		-1.02	-0.74	-0.34	-1.14		-0.41	-0.84	-0.71	-0.96	-0.64		-0.95	-0.58	-0.36		-1	-0.48	-0.68	-0.66	-0.81	-0.72	-1.02	-0.69	0.4	-0.68	0.09	-0.59	0.07	0.22	-0.04	-0.38	-0.47	-0.21	-0.83	-0.29
GENE2707X	IMAGE:629906	115579 OGN osteoglycin (osteoinductive factor, mimecan) Hs.109439 AA219099	1	-0.44	0.87	-0.38		-0.32	-0.61	-0.53					-0.6	-0.35	-0.44	-0.64		-0.11			-0.5	-0.39	-0.78	-0.68	-0.31	-0.48	-0.86	-0.81	0.27	-0.67	-0.52	-1.03	-0.89	-0.54	-0.5	0.55	-0.39	-0.47	-0.49	0.07	0.68	-0.18		-0.45	-0.79
GENE4528X	IMAGE:857612	224743 Homo sapiens cDNA FLJ32389 fis, clone SKMUS1000138, highly similar to HEAT-SHOCK 20 KDA LIKE-PROTEIN P20 Hs.351558 AA782333	1	-0.94	1.11	-1.45			-1.03	-1.95	0.36	-0.22		-2.48	-1.72	-1.46	-1.04			-0.36		-0.74	-0.17	-0.37	-1.06	-1.95	-0.21	-0.3	-1.67	-1.28	-1.09	-1.67	-1.6	-1.94	-1.67	-1.51	0.08	1	-0.67	-0.59	-2.16	-0.95	0.54	0.76	-1.31	-1.82	-1.68	2.48	0.84
GENE6325X	IMAGE:1687019	319877 EST Hs.235059 AI088903	1	-0.29	-0.12	-1.02	-0.05	0.01	-0.63	-0.37		-1.23	-0.32	-1.25	-0.95		-0.53	-1.53		-0.35	-0.41	-0.9	0.34	-0.33	-0.38		-0.94	-0.3		-1.33	-1.16	-1.26	-1.21	0.07	-1.23	-0.21	-1.3	0.32	-0.33	0.35	-1.31	0.13	0.31	0.85	0.57	-0.42		-1.64	-1.36
GENE3329X	IMAGE:52096	119128 PDGFRA platelet-derived growth factor receptor, alpha polypeptide Hs.74615 H23235	1	-0.29	0.17	-0.69	0.32	0.06	-0.69	0.08	-0.59		0.66	0.35	-0.94	-0.71	-0.13	-1.89	-0.89	-0.36	0.48	0.56	0.47	-0.51	-0.99	-1.32	-0.55	-0.56	-0.89	-1.07	-0.37	-1.56	-1.13	-0.24	-0.49	-0.27	-1.01	-0.32	-0.12	-0.42	-1.02	0.15	0.21	0.65	0.7	-0.44	-0.83	-1.39	-1.26
GENE2881X	IMAGE:502367	116552 FBLN1 fibulin 1 Hs.79732 AA134757	1	1.01	0.93	-1.57	-0.28	0.29	-1.17	-0.18	0.36		1.13	1.7	-0.45	-0.2	-0.62	-2.5	-2.24	0.09	-0.82	-0.07	-0.76	-1.26	-1.49	-1.34	-0.3	-0.34	-1.28	-1.79	-0.58	-2.23	-2.94	-1.92	-1.14	-1.63	-1.48	-0.8	-0.29	0.06	-1.71	0.29	0.74	-1.23	-0.49	-1.04	-1.24	-1.7	-1.24
GENE2699X	IMAGE:1129559	115536 FBLN1 fibulin 1 Hs.79732 AA614680	1	1.23	1.22	-0.96	0.27	0.19	-1.37	-1.08	0.29	0.33	1.1		-0.98	-0.22	-0.32	-2.4	-1.76	-0.13	-0.32		-0.69	-1.1	-0.72	-0.96	0.08	-0.53	-1.49	-1.65	-0.18	-2.32	-3.33	-1.98	-0.82	-1.43	-1.51	-0.61	-0.58	0.11	-1.62	-0.1	0.18	-0.58	-0.32	-0.97	-1.45	-1.32	-0.97
GENE2111X	IMAGE:759173	112221 PYGM phosphorylase, glycogen; muscle (McArdle syndrome, glycogen storage disease type V) Hs.154084 AA436943	1	1.25	0.46	-0.68	-0.67	-0.33	-0.99	-0.55	-0.57	-0.31	0.48	0.75	-1.61	-1.31	-1.36	-1.66	-2.4	-0.44	-1.22	-0.3	-0.25	-0.01		-1.1	-0.68	-0.69	-1.82	-1.68	-0.54	-1.89	-1.77	-0.84	-1.38	-0.83	-0.51	-0.04	-1.25	-0.63	-0.91	0.25	0.37	0.54	0.21	-0.1	-0.56	0.47	-1.4
GENE849X	IMAGE:759163	104910 MFAP4 microfibrillar-associated protein 4 Hs.296049 AA442695	1	0.68	0.54	-0.44	-0.39	-0.46	-0.98	-0.06	-0.55	-0.47	0.8	0.93	-0.46	-1.06	-1.08	-1.06	-2.26	-0.44	-1.46	0.52	0.01	-0.45	-1		-0.35	-0.82	-1.76	-1.71	-0.29	-1.69		-0.82	-1.47	-1.15	-0.73	-0.55	-0.64		-0.34	0.07	0.34	-0.34	0.15	-0.09	-0.63		-1.93
GENE1200X	IMAGE:813266	107074 FHL1 four and a half LIM domains 1 Hs.239069 AA455925	1	0.67	0.49	-1.04	-1.11	0.22	-1.04	-0.65	-0.47	-0.75	-0.48	-0.75	-0.17	-1	-1.05	-1.01	-2.11	-0.58	-1.28	0.21	-0.15	-0.16	-0.18	-1.77	-0.18	-0.57	-0.82	-1.49	0.16	-1.4	-1.5	-1.61	-1.07	-1.18	-0.74	-0.97	-0.67	-0.8	-1.07	-1.31	0.15	0.13	0.4	-0.47	-1.12	-1.86	-0.69
GENE316X	IMAGE:205049	101857 H11 protein kinase H11 Hs.111676 H57493	1	0.23	0.35	-0.61	-1.23	-0.49	0.13	-1.03	-0.41	0.71	0.24	-0.55	-0.78	-0.27	-0.64	-1.55	-1.03	-0.49	-1.33	0.3	-0.52	0.04	-0.2	0.29	-0.56	-0.01	-0.53	-1.21	-0.28	-0.76	-1.19	-1.99	-1.04	-1.21	-0.71	-0.64	-0.66	-0.34	-0.76	-0.93	0.55	-0.37	-0.82	-0.64	-0.34	0.35	-1.13
GENE2381X	IMAGE:359191	113700 H11 protein kinase H11 Hs.111676 AA010110	1	1.05	0.48	-0.61	-1.49	-1.17	-0.05	-0.88	-0.16	1.17	0.38		-0.48	-0.49	0.21	-1.27	-1.08	0.21	-1.34		-1.34	0.28	-0.11	-0.77	-0.31	-0.21	-1.95	-0.99	0.17	-1.33	-1.37	-2.34	-1.85	-1.44	-0.43	-0.53	-0.93	-0.37	-0.8	-0.16	0.5	-0.58	-0.9	-0.3	-0.47	0.58	-1.57
GENE3386X	IMAGE:230100	119516 RANBP2 RAN binding protein 2 Hs.199179 H78788	1	0.65	0.47	-1.89	-0.92	-0.06	-0.06	-0.85	0.09	0.79		-0.41	-0.34	-0.1	-0.33	-0.26	-0.78	-0.1	-1.19	-0.17	0.35	-0.02	0.7	-0.23	0.24	0.07	-0.2	-0.32	0.66	-0.62	-0.07	-0.38	-0.56	-0.47	0.06	0	0.06	-0.46	-0.61	-0.5	0.74	0.24	-0.48	0.09	-0.63	-0.06	-0.5
GENE3284X	IMAGE:839736	118867 CRYAB crystallin, alpha B Hs.1940 AA504891	1	-0.11	0.29	-0.94	-0.97	-0.03	-0.78	-0.62	0.66	0.39	0.12	-0.37	-1.01	-0.7	-0.81	-0.54	-0.28	-0.88	-0.82	-0.39	-0.27	-0.27	-0.1	-0.93	-0.16	-0.09	-0.67		-1.09	-0.12	-0.87	-1.14	-0.64	-0.63	-0.34	0.09	0.03	0.27	-0.61	-1.21	0.52	0.03	-0.21	-0.13	-0.54	0	-0.72
GENE1291X	IMAGE:812008	107540 MRVI1 murine retrovirus integration site 1 homolog Hs.251385 AA455877	1	-0.08	0.55	-1.69	-0.19	-0.44	-0.85	-0.28	-0.84	-0.6	0	-0.46	-1.32	-1.32	-0.57	-1.71		-0.54	-0.13	-0.15	0.11	-0.07	-0.26		-0.87	-1.14	-0.92	-1.19	-0.96	-1.7	-0.95	-0.64	-0.81	-0.72	0.04	0.54		-0.28	-1.34	-0.24	0.44	0.78	-0.4	0.03	-1.12	-1.5	-1.86
GENE2709X	IMAGE:470122	115589 KCNMB1 potassium large conductance calcium-activated channel, subfamily M, beta member 1 Hs.93841 AA029299	1	-0.01	0.53	-0.94		-0.38	-0.42	-0.84	-0.19			-0.98	-0.8	-0.66	-0.39	-0.66		-0.29		-0.22	-0.48	0.33	-0.52		-0.33	-0.48	-1.08	-0.2	-0.26	-0.74	-0.54	-0.57	-0.68	-0.74	0.07	0.61	-0.52	-0.36	-0.65	-0.54	0.55	0.31	-0.48	0.07	-0.59		-1.34
GENE585X	IMAGE:301400	103278 PLN phospholamban Hs.85050 AI668637	1	-0.23	0.69	-1.04	-0.84	-0.77	-1.05	-0.28	0.37	0.31	-0.83		-1.46	-0.74	-0.31	-1.08	-0.6	-0.35	-1.18		-0.85	-0.56		-1.24	-0.26	-0.38	-1.8	-0.95	-0.44	-1.37	-0.94	-1.6	-1.49	-1.06	0.25	0.23	-0.56	0.53	-0.92	-0.68	1.25	0.58	-1.01	0.24	-1.13	-0.51	-1.33
GENE3737X	IMAGE:306513	220157 ESTs, Weakly similar to I38022 hypothetical protein [H.sapiens] Hs.339024 N91811	1	0.38	0.97	-1.56	-0.65	-0.32	-0.65	-0.05	-0.08			-0.18		-0.65	-0.18	-1.53		0.09		0.2	-1.53	-0.67	-0.6	-0.26	-0.76	0.04	-0.85	-0.97	0.04	-1.95	-0.75	-1.57	-0.82	-1.47	-0.42	0.09	0.12	0.47	-0.87	0.3	1.05	0.24	-0.88	0.18	-0.5	-1.83	-1.31
GENE9X	IMAGE:740620	100052 TPM2 tropomyosin 2 (beta) Hs.300772 AA477400	1	0.3	0.77	-1.63	-0.91	-0.26	-0.25	-0.54	0.46	0.57	0.88	0.31	-1.15	-0.08	-0.89	-1.39	-0.65	-0.42	0.44	-0.36	-0.59	-0.19	0.13	-0.26	-0.04	-0.23	-0.77	-0.5	0.17	-1.15	-1.32	-1.43	-0.76	-1.04	0.53	0.12	-0.14	0.35	-0.41	-1.23	0.53	0.41	-0.09	-0.17	-0.72	-0.69	0.2
GENE421X	IMAGE:126341	102457 Homo sapiens cDNA: FLJ22300 fis, clone HRC04759 Hs.288965 R06438	1	0.45	1.33	-2.13		-0.53	-0.79	0.25	0.44	-0.18	0.07	-0.52	-1.04	-1.59	-1.32	-2.12	-1.38	-0.36	-0.71	-0.18	-0.79	-0.45	-0.13	0.23	-0.25	0.1	-0.79	-1.32	-0.14	-2.27	-1.95	-1.85	-1.21	-1.61	0.42	0.86	0.59	-0.66	-0.97	-0.23	1.6	0.53	-1.12	0.27	-0.81	-2.18	-2.1
GENE5688X	IMAGE:1680098	311351 EST Hs.134161 AI079397	1	0.77	0.85	-1.86	-0.84	-1.07	-0.99	-0.73	0.99	0.47	0.93	-0.47	-1.7	-0.67	-0.6	-1.99		-0.62	-0.33	0.12	-0.84	-0.65	0.18	0.25	0.31	0.2	-0.36		-0.64	-1.94	-2.14	-2.18	-1.11	-2.06	-0.09	0.44	-0.11	-0.12	-0.62	-0.9	0.96	0.52	-1.45	-0.01	-0.55	-2	-1.79
GENE2195X	IMAGE:359457	112690 TAGLN transgelin Hs.75777 AA010664	1	0.59	0.99	-2.01	-0.65	-1.05	-0.85	-1.01	0.94	0.62	0.91		-1.71	-0.65	-0.39	-2	-0.74	-0.59	-0.24		-0.81	-0.57	0.47	0.18	0.06	0.09	-0.52	-1.41	-0.6	-1.96	-1.86	-2.2	-1.06	-2.09	0.34	0.61	0.41	0.11	-0.8	-0.98	1.19	0.47	-1.48	0.12	-0.62	-2.05	-1.59
GENE1749X	IMAGE:1944026	110072 TAGLN **transgelin Hs.75777 AI201825	1	0.56	1.12	-2.04	-0.83	-1.23	-0.76	-0.66	0.86	0.55	0.84	-0.44	-1.66	-0.83	-0.49	-1.99	-0.65		-0.4	0.11	-0.65	-0.38	0.53	0.14	-0.09	-0.07	-0.65	-1.42	-0.37	-2.08	-1.95	-2.17	-1.08	-2.16	0.24	0.81	0.04	0.19	-1.09	-0.83	1.03	0.39	-1.43	-0.01	-0.6	-1.87	-1.12
GENE3460X	IMAGE:359504	119955 FLII flightless I homolog (Drosophila) Hs.83849 AA010589	1	0.47	0.82	-1.85	-0.96	-0.59	-1.07	-0.73	1.03	0.79	1.63		-1.63	-0.62	-0.23		-0.37	-0.51	1.61		-0.71	-0.57	0.25	0.16	-0.18	-0.06	-0.68	-1.33	-0.34	-1.63	-1.3	-1.98	-1.11	-1.93	-0.06	0.19	-0.27	0.04	-0.53	-0.62	0.53	0.55	-1.24	-0.25	-0.54	-1.87	-1.1
GENE2572X	IMAGE:880630	114828 MGC3036 hypothetical protein MGC3036 Hs.284135 AA468630	1	0.43	0.45	-1.56	-0.6	-0.66	-0.4	-0.38	0.93	0.52	0.25	-0.27	-1.09	-0.77	-0.3	-0.45	-0.54	-0.18		0.08	-0.36	-0.37	0.53	0.64	0.31	-0.05	-0.51	-1.3	0.01	-0.96	-0.7	-1.33	-0.64	-1.49	0.14	0.14	0.25	0.24	-0.17	-0.25	0.23	0.28	-1.18	-0.12	-0.37	-1.1	-1.37
GENE858X	IMAGE:880747	104969 MGC3036 hypothetical protein MGC3036 Hs.284135 AA468776	1	0.38	0.4	-1.21	-0.48	-0.51	-0.23	-0.15	0.49	0.54	0.09	-0.64	-0.75	-0.53	-0.12	-0.6	-0.45	-0.32	-0.62	-0.72	-0.8	-0.17	0.29	0.66	0.54	0.17	-0.17	-0.51	-0.27	-0.87	-0.94	-1.09	-0.55	-1.49	0.39	0.48	-0.14	-0.11	-0.11	-0.47	0.33	0.53	-1.15	-0.16	-0.48	-0.98	-0.93
GENE1214X	IMAGE:726779	107127 CNN1 calponin 1, basic, smooth muscle Hs.21223 AA398400	1	0.64	1.1	-2.03	-1.28	-0.77	-0.45	-0.42	0.37	1.38	0.21	-1.36	-1.19	-1.2	-0.85	-1.53	-0.78	-0.3	-0.65	-0.1	-0.34	-0.29	0.52	-0.73	0.21	-0.68	-0.92	-1.08	-0.25	-2.06	-1.99		-1.09	-1.71	1.38	0.46	0.49	-0.8	-0.43	-0.55	1.22	1.14	-1.71	-0.15	-1.42	-1.9	-2.84
GENE3248X	IMAGE:325375	118680 Homo sapiens cDNA FLJ20767 fis, clone COL06986 Hs.24192 W52186	1	0.1	1.5	-1.44	-0.78	-0.81	-0.49	-0.91	-0.53	0.54	-1.05	-0.94	-2.06	-2	-0.98	-1.33	-1.64	-0.4	-1.57	0.7	-1.09	-0.22	0.59	-0.99	-0.18	-0.04	-1.68	-1.13	-0.13	-1.78	-1.92	-2.01	-1.25	-1.22	1.09	0.53	-0.59	-1.11	-1.15	-0.95	1.09	0.85	-1.02	-0.16	-1.25	-0.71	-1.96
GENE3145X	IMAGE:488130	118032 Homo sapiens cDNA FLJ20767 fis, clone COL06986 Hs.24192 AA047418	1	-0.27	1.55		-0.99	-0.81	-1.64	-1.32	-0.21	0.39	-1.95		-1.5	-1.7	-1.09	-1.76		-0.29	-1.36	-0.23	-0.27	-0.2	-0.06		-0.38	-0.64	-2.09	-1.44	-0.39	-2.39	-2	-2.24	-1.83	-1.74	0.54	0.49	-0.87	-0.95	-1.12	-0.41	0.85	0.66	-1.08	-1	-1.47	-0.93	-2.31
GENE68X	IMAGE:134422	100341 Homo sapiens cDNA FLJ20767 fis, clone COL06986 Hs.24192 R31679	1	-0.16	1.47	-2.39	-1.26	-0.9	-0.91	-1.12	-0.2	0.19	-2.13	-1.66	-2.1	-1.9	-1.2	-1.83	-1.96	-0.64	-1.18	0.51	-0.88	-0.14	-0.54		-0.23	-0.48	-2.05	-1.69	-0.47	-1.93	-2.06	-2.17	-1.7	-1.45	0.81	0.53	-0.6	-1.07	-1.36	-0.63	1.31	0.86	-1.14	-0.81	-1.68	-1.03	-2.25
GENE1971X	IMAGE:487794	111432 Homo sapiens cDNA FLJ20767 fis, clone COL06986 Hs.24192 AA043349	1	-0.77	1.8		-0.92	-0.64	-0.94	-0.74	-0.66	0.09		-1.4	-1.4		-0.97	-1.27		-0.37	-1.37	-0.1	-1.08	-0.21	-0.37		-0.44	-0.67	-1.95	-1.23		-1.62	-1.43	-1.5	-1.73	-1.47	0.6	0.52	-0.32	-1.35	-1.24	-0.72	1.01	0.8	-1.27	-0.44	-1.51		-1.59
GENE69X	IMAGE:502177	100359 MYH11 myosin, heavy polypeptide 11, smooth muscle Hs.78344 AA126989	1	0.59	2.01	-2.47	-1.28	-1.22	-0.79	-0.63	-0.01	-0.03	-0.84		-1.71	-2.09	-2.02	-1.83	-1.8	-0.39	-1.42	-0.41	0.48	0.91	0.82	-1.14	-0.22	0.38	-1.85	-0.71	-0.28	-1.79	-1.87	-1.17	-0.47	-0.99	1.67	0.62	0.18	-0.29	-1.56	-1.04	1.65	1.89	-0.32	0.39	-1.11	-1.48	-1.37
GENE1455X	IMAGE:774078	108420 LMOD1 leiomodin 1 (smooth muscle) Hs.79386 AA441933	1	-0.12	0.48			-0.81	-0.7	-0.39	0.25	0.23		-0.97	-0.96	-0.85	-0.78	-0.84		-0.2		-0.09	-0.22	0.13	-0.42	-0.52	-0.16	-0.04	-0.52	-0.41	0.12	-0.77	-1.35	-0.88	-0.67	-0.75	0.05	0.39	-0.4	-0.52	-0.69	-0.6	0.18	0.66	-0.73	0.19	-0.8	-0.95
GENE2963X	IMAGE:796406	116929 SH3D5 SH3-domain protein 5 (ponsin) Hs.108924 AA459944	1	-0.07	0.66	-1.2	-1.07	1.19	-0.94	-0.37	0.12	0.2	-0.4	0.35	-0.44	-1.21	-1.19	-0.28	0	-0.43	-0.73	-0.13	-0.48	-0.4	-0.13	-0.68	-0.67	0.25	-1.2	-1.42	-0.39	-1.84	-2.04	-1.34	0.06	-1.32	-0.48	0.45	-0.57	-0.55	-1.74	-1.09	1.07	0.89	-1.07	-0.09	-1.59		-1.6
GENE397X	IMAGE:301191	102324 **Homo sapiens cDNA FLJ32766 fis, clone TESTI2001862 Hs.9973 AI822089	1	0.07	1.09	-1.24	-0.66	-0.65	-1.7	-0.75	0.58	0.13	0.07	0.75	-1.26	-1.83	-0.64	-1.1	-0.68	-0.08	0.37	-0.03	-0.62	-0.49	0.03		-1.37	-0.61	-1.13	-1.76	-1.7	-2.24	-1.36	-1.61	-1.52	-1.64	-0.28	0.29	-0.44	-0.24	-1.39	-0.45	0.86	0.65	-0.96	0.28	-0.46	-0.89	-0.78
GENE2517X	IMAGE:485985	114494 ACTA2 actin, alpha 2, smooth muscle, aorta Hs.195851 AA040169	1	0	0.61	-1.07	-0.51	-0.47	-0.75	-1.09	1.25	0.47	1.08		-0.61	-0.69	-0.07	-0.98	-0.13	0.2	0.17		0.04	-0.28	-0.04	-0.42	-0.46	-0.28	-0.2	-0.66	-0.2	-0.85	-0.62	-1	-0.89	-1.17	-0.27	0.62	0.07	0.31	-0.83	-0.11	1.05	0.74	-1.23	-0.14	-0.45	-1.04	-1.29
GENE1851X	IMAGE:809611	110702 PPP1R14A protein phosphatase 1, regulatory (inhibitor) subunit 14A Hs.348037 AA458487	1	0.19	0.66	-1.1	-0.58	-0.87	-0.31	0.27	0.21		0.29	-0.73	-0.45	-0.9	-0.39	-0.71		-0.07	0.15	1.01	-0.57	-0.44	-1.06	-0.55	-0.41	-0.85	-1.27	-1.48	-0.36	-1.99	-0.67	-0.4	-1.06	-0.92	-0.51	0.02	-0.11	-0.16	-1.13	-1.18	0.04	-0.07	-0.63	-0.16	-0.57	-1.14	0.33
GENE4219X	IMAGE:487302	222994 HSPB7 heat shock 27kD protein family, member 7 (cardiovascular) Hs.56874 AA040608	1	-0.11	0.51		-1.36	-0.44	-1.16	-1.23	0.56		-1.19	-0.15	-1.37	-0.72	-0.53	-0.7		-0.25			-0.68	0.26	-0.53	-1.05	-0.61	-0.9	-0.96	-1.09	-0.6	-1.17	-1.23	-1.6	-0.9	-1.23	0.44	0.34	-0.46	-0.67	-1.09	-0.21	0.57	1.19	-1	-1.19	-1.12		-1.09
GENE2714X	IMAGE:785459	115611 SMTN smoothelin Hs.149098 AA449234	1	-0.1	0.82	-0.57	-1.02	-0.08	-0.6	-1.07		0.86		1.13	-0.32	-0.39	-0.26	-1.1	0.13	-0.1	-0.53	0.11	0.37	-0.48	-0.21	-0.27	-0.01	0.03	-0.46	-0.41	-0.12	-0.93	-0.41	-0.8	-1.04	-1	0.21	0.28	-0.4	-0.46	-0.44	-0.45	0.55	0.18	-0.55	-0.43	-1.08	-1.43	-0.27
GENE3157X	IMAGE:841308	118075 MYLK myosin, light polypeptide kinase Hs.211582 AA487215	1	0.11	0.49	-0.87	-0.34	-0.32	-0.53	0.09	0.66	0.11	1.15	-0.09	-0.36	-0.53	-0.32	-1.14	-0.67	0.19	0.22	0.15	-0.23	-0.45	-0.32	-0.11	0.12	0.05	-0.54	-0.41	-0.21	-0.37	-0.62	-0.67	-0.37	-0.56	0.85	0.48	0.55	-0.55	-0.26	-0.51	0.72	0.97	-0.41	0.32	-0.28	-1.52	-1.43
GENE2338X	IMAGE:491367	113442 Homo sapiens cDNA FLJ25277 fis, clone STM06387 Hs.349303 AA148524	1	-0.45	0.39	-0.37	-0.22	0.11	-0.89	0.3	-0.51	-0.18	0.29	-0.44	-1.12	-0.81	-0.55	-1.2	-1.06	-0.21	-0.56	0.05	-0.62	-0.5	0.56	-0.18	-0.46	0.38	-1.05	-0.53	0.23	-1.03	-0.6	-0.78	-0.13	-1.21	-0.45	0.41	0.17	-0.01	-0.27	-0.18	0.87	0.65	-0.3	-0.1	-0.48	-0.69	-0.9
GENE4039X	IMAGE:590242	222061 Homo sapiens cDNA FLJ25277 fis, clone STM06387 Hs.349303 AA155907	1	0.16	0.19	-0.79	0.22	0	-0.9	0.14		-0.51	0.3	0.03	-0.92	-0.63	-0.08	-0.82	-1.87	-0.13	-0.39	-0.73	-1.01	-0.55	-0.02	-0.33	-0.36	-0.01	-0.17	-0.53	-0.25	-0.58	-0.9	-1.37	-0.52	-1.13	-0.49	0.44	-0.4	0.05	-0.57	0.25	0.43	0.18	-0.3	-0.11	-0.43	-0.98	-1.16
GENE4356X	IMAGE:502689	223834 Homo sapiens clone HH409 unknown mRNA Hs.216381 AA126195	1	0	0.36	-0.11	-0.06	0.01	-1.16	-0.46	-0.22	-0.5	0.35		-1.31	-0.7	-0.58	-1.3	-1.94	-0.3	0.19	-0.58	-0.82	-0.39	0.43	0.48	-0.32	-0.46	-0.79	-0.71	-0.31	-0.97	-1.32	-1.04	-0.17	-1.33	-0.25	0.1	-0.24	0.16	-0.51	0.22	0.63	0.65	0	-0.03	-0.59	-0.7	-0.84
GENE4878X	IMAGE:1584628	226683 ALP alpha-actinin-2-associated LIM protein Hs.135281 AA972352	1	0.7	1.16	-1.99	-0.41	0.02	-0.57	0.01	-0.65	0.12	0.22	-0.58	-1.76	-1.17	0.03	-1.36	-0.45	-0.88	-0.64	-0.48	-1.49	-0.13	0.07	-0.72	-0.2	0.24	-0.93	-0.91	0.21	-1.13	-1.68	-1.64	-0.42	0.09	-0.21	0.07	-0.5	0.16	-0.43	-0.22	1.22	1.37	-1.12	0.34	0.45	-1.17	-1.08
GENE4490X	IMAGE:1581507	224530 SEMA6C sema domain, transmembrane domain (TM), and cytoplasmic domain, (semaphorin) 6C Hs.54937 AA983888	1	0.28	0.31	-1	-0.02	0.04	-0.31	-0.5	-0.67	0.33	0.74	0.05	-0.6	-0.87	-0.15	-0.87			-0.49	0.16		-0.51	0.07	-0.56		0.22		-0.51	0.19	-0.54	-0.86	-0.72	-0.11	-0.01	-0.12	0.25	-0.16	-0.23		-0.16	0.58	1.15	-0.63	0.41	0.19		-0.98
GENE3864X	IMAGE:1636447	220964 GNG11 guanine nucleotide binding protein 11 Hs.83381 AA999901	1	0.32	0.64	-0.33	0.43	0.29	-0.09	-0.51	-0.32	-0.2	0.63	0.13	-0.53	-0.46	0.12	-0.64	-0.83	0.02	0.06	0.64	-0.31	-0.07	-0.21	-0.52	-0.67	-0.84	-1	-1.56	-0.47	-1.1	-0.67	-0.96	-0.83	-1.03	-1.86	-0.18	0.02	-0.22	-0.88	-0.21	0.07	-0.52	-0.22	-0.65	-0.3	-1.27	-1.02
GENE2295X	IMAGE:878182	113214 A2M alpha-2-macroglobulin Hs.74561 AA775447	1	0.24	0.37	-0.85	-0.11	-0.36	-1.02	-0.31	0.03	-0.41	0.66	-0.05	-0.46	-0.78	-0.09	-0.06	-0.86	0.56	-0.71	0.26	-0.57	0.24	-0.75	-1.23	-0.14	-0.41	-0.79	-1.52	-0.97	-1.2	-0.86	-1.2	-1.01	-0.97	-1.2	-0.84	-0.24	-0.15	-0.68	-0.41	0.18	-0.55	0.57	-0.16	-0.77	-1.03	-1.29
GENE5982X	IMAGE:1470128	315148 Homo sapiens cDNA FLJ11490 fis, clone HEMBA1001918 Hs.98518 AA865547	1	-0.5		-0.74	-0.24	-0.2	-0.77	-0.05	0.55	-0.46	-0.59	-1.07	-0.94	-0.6	-0.08	-1.56	-1.29	-0.24	-1.62	-0.97	-1	-0.01	-0.12		-0.19	-0.09	-0.67	-0.83	0.19	-0.69	-1.59	-1.29	-0.91	-1.03	-0.64	0.44	0.44	2.21	0.09	-0.05	0.59	0.04	-0.38	-0.22	0.51	1.03	-1.02
GENE6405X	IMAGE:549221	98364 MGP matrix Gla protein Hs.279009 AA081092	1	0.26	0.41	-1.15	0.6	-0.48	-1.1	-0.27	1.05	0.16	-0.49		-1.53	-1.88	0.8	-1.15		0.59	-2.21		-1.03	-0.92	-0.45	-1.95	-0.65	-0.44	-2.12	-2.56	-0.55	-1.71	-2.38	-2.42	-2.35	-2.27	-0.81	0.87	-0.23	0.62	-2.36	-0.4	0.43	0.09	0.24	0.05	-0.06	0.07	-0.29
GENE1579X	IMAGE:590264	109102 MGP matrix Gla protein Hs.279009 AA155913	1	0.48	0.47	-1.71	0.66	-0.4	-0.61	0.58	1.18	-0.08	-0.48	-0.39	-1.46	-1.77	0.76	-0.94	-1.97	0.32	-1.92	-0.24	-1.61	-0.95	-1.23	-2.9	-0.98	-0.62	-2.87	-2.93	-0.88	-1.28	-2.15	-2.39	-2.74	-2.19	-0.37	0.64	0.32	0.76	-2.67	-0.12	0.66	-0.18	-0.09	0.39	0	-0.05	-0.23
GENE3458X	IMAGE:758266	119951 THBS4 thrombospondin 4 Hs.75774 AA423957	1	0.6	1.17	-1.07	-0.56	-0.77	-0.92	1.07	0.9	-0.39			-0.94	-1.53	-0.7	-0.82		0.13		-0.58	-1.27	-0.04	-0.49	-1.09	-1.16	-0.71		-0.99	-0.86	-1.34	-1.71	-1.46		-1.1	0.34	1.51	1.07	0.55	-1.37	0.33	1.18	0.45	-0.65	0.25	0.04	-0.49	0.38
GENE3627X	IMAGE:796148	120950 SCRG1 scrapie responsive protein 1 Hs.7122 AA460975	1	-0.09	1.21		-1.19	-0.81	-0.73	0.44	1.75				-0.72	-0.75	-0.29			-0.61			-0.97	-0.11	-0.05	-0.71	-0.12	-0.28	-1.2	-0.73	-0.12	-1.16	-0.49	-1.54	-0.94	-1.17	-0.42	1.62	0.33	-0.04	-1.3	0.32	0.67	0.09	-1.43	-0.28			-1.34
GENE4428X	IMAGE:454472	224182 DNAJB5 DnaJ (Hsp40) homolog, subfamily B, member 5 Hs.237506 AA677329	1	-0.08	1.01		-0.08	0.16	-0.59	-0.08	-0.38	0.87	-0.48	-0.67	-0.49	-0.26	0.04	-0.42	-0.24	0.12		-0.09	-0.42	-0.05	-0.15	-0.13	-0.13	-0.09	-0.18	-0.45	0.18	-0.9	-0.47	-0.93	-0.38	-1.15	-0.57	0.11	-0.37	0	-0.01	-0.14	0.46	0.34	-0.46	-0.25	0.04	-0.39	-0.88
GENE2204X	IMAGE:729924	112747 ESTs Hs.24872 AA399633	1	-0.16	1.51		-1.41	-0.11	-0.63	-0.61	0.37	-0.84	0.54	-1.26		0.21	-0.43	-0.77	-0.78	-0.45		0.09	-1.01	-0.41	0.28			-0.64		-1.18	-0.63	-0.96	-1.49	-1.28	-0.67	-0.75	0.31	-0.27	-1.51	0.86	-1.1	-0.88		0.69	-1.11	0.34	0.12	-0.74	-0.55
GENE1019X	IMAGE:810272	105890 PPP1R12B protein phosphatase 1, regulatory (inhibitor) subunit 12B Hs.130760 AA463926	1	-0.03	1.01	-0.68	-0.77	-0.44	-1.09	0.49	0.22	-0.25	0.34	-0.03	-1.29	-1.21	-1.2	-0.82	-1.44	0.19	0.63	0.39	-0.59	0.26	-0.55	-1.39	-1.22		1.35	-1.37	-0.13	-1.62	-2.1	-1.53	-1.33	-0.52	0.08	0.42	-0.58	-1.04	-1.23	-0.23	1.25	-0.13	-0.6	0.35	-0.22	-0.19	-0.7
GENE5669X	IMAGE:2321104	311093 FLNC filamin C, gamma (actin binding protein 280) Hs.58414 AI675658	1	0.56	0.81	-1.48		-0.29	-0.32	-0.23	0.27		-0.01		-0.72	-0.2	0	-1.81		0.4		-0.07	-1.14	-0.98	0.09	0.68	-0.29	-0.28	0.64	-0.31	-0.87	-1.73	-1.21	0.55	-1.18	-0.72	1.52	0.37		-0.08	-0.25	0.31	0.79	-0.65	-1.55	-0.81	-0.9		-1.47
GENE5456X	IMAGE:66852	309646 T64982	1	0.51	1.31	-0.7	-1.43	0.35	-1	-0.6	0.29	0.81		-1.27	-0.49	-0.04	0.15	-1.36	-0.79	0.61	-0.89	-0.36	-0.39	0.08	0.32	1.01	0.02	-0.1	1.14	-0.44	-0.43	-1.35	0.05	1.19	-1.13	-0.21	1.18	0.38	0.17	0.02	-0.19	0.37	0.72	0.28	-0.54	-0.43	-0.93	-1.29	-1.41
GENE4067X	IMAGE:773495	222179 SPON1 spondin 1, (f-spondin) extracellular matrix protein Hs.5378 AA427924	1	0.17	0.73	-1.52	1.19	0.51	-1.03	-0.6	-0.59	-1	1.03	-0.85	-1.06	-0.69	-1.49	-2.75	-2.81	-0.83	-0.81	0.53	-0.04	0	-0.06	-0.86	-0.61	-0.3	-1.44	-2.16	-0.29	-1.7	-1.27	-1.65	-0.79	-1.81	-1.91	0.53	1.57	1.17	1.01	-0.42	0.85	-0.22	0.12	0.81	-0.89	-1.56	-0.38
GENE2765X	IMAGE:46173	115949 SPON1 spondin 1, (f-spondin) extracellular matrix protein Hs.5378 H09099	1	0.52	0.63	-1.58	1.47	-0.27	-0.36	0.5	-1.17	-0.47	1.12	-1.02	0.66	0.62	0.8	-2.62	-3.57	-1.44	-1.56	0.72	0.01	-0.08	-0.88	0.02	0.93	0.39	-2.28	-0.84	0.2	-1.47	-2.47	-0.65	-1.05	-1.52	-0.92	0.61	2.74	1.42	1.39	-0.58	0.46	-0.14	-0.35	1.48	-0.08	-1.61	-0.29
GENE930X	IMAGE:210717	105408 SDC2 syndecan 2 (heparan sulfate proteoglycan 1, cell surface-associated, fibroglycan) Hs.1501 H64346	1	0.53	-0.52	-1.53	-0.32	-0.17	0.41	0.56	0.02	0.76	0.32		1.93	-0.49	-0.18	-1.39	-0.71	-0.13	-0.42	0.42	-1.23	-0.85	-0.29	0.22	0.23	0.08	-0.52	-1.27	0.65	-0.56	-0.14	-0.63	-0.61	-0.74	-1.09	-0.24	0.56	-0.34	0.22	0.19	0.52	0.09	-0.43	-0.34	-0.35	-0.04	-0.96
GENE233X	IMAGE:154472	101364 FGFR1 fibroblast growth factor receptor 1 (fms-related tyrosine kinase 2, Pfeiffer syndrome) Hs.748 R54610	1	-0.24	-0.04		-0.84	-0.17	-0.52	-0.57	1.17	0.09	0.08	0.6	2.61	-0.39	-0.02	-1.97	-0.76	-0.18	-0.43	-0.19	-0.32	-0.21	0.01		-0.19	-0.13	-0.33	-0.48		-0.27	-0.43	-0.75	-0.68	-1.14	-1	-0.28	0.3	0.18	-0.42	-0.13	0.22	0.18	0.35	-1.21	0.24	0.66	-1.3
GENE3369X	IMAGE:711857	119431 FGFR1 fibroblast growth factor receptor 1 (fms-related tyrosine kinase 2, Pfeiffer syndrome) Hs.748 AA281064	1	0.14	-0.03	-1.02	-0.76	-0.36	-0.84	-0.27	0.22	-0.42	-0.16		3.2	-0.3	-0.62	-1.75	-1.31	-0.6	-0.66		-0.36	-0.55	0	-0.02	0.03	0.06	-0.86	-1.17	0.38	-0.5	-0.42	-1.17	-0.73	-0.94	-1.1	-0.38	0.22	-0.43	-1.02	-0.68	-0.08	0.01	0.27	-0.38	0.19	0.69	-1.16
GENE2823X	IMAGE:784109	116230 SGCE sarcoglycan, epsilon Hs.110708 AA432066	1	0.08	0.06	-0.8	-0.31		-0.18	0.16	0.65		0.4	0.53	2.7	-0.9	-0.42	-1.92	-1.57	-0.48	0.42	0.62	-0.1	1.31	-0.32	-0.91	-0.27	-0.13	-0.99	-1.71	-0.6	-1.56	-1.06	-1.82	-1.13	-0.84	-1.05	-0.57	0.5	0.91	-0.44	-0.23		-0.37	-0.4	1.03	-0.07	-0.24	-0.8
GENE2565X	IMAGE:52930	114766 MIG2 mitogen inducible 2 Hs.75260 H29252	1	0.16	0.77	-0.99	0.09	-0.39	-0.04	0.37	-1.04	0.81			0.76	-0.89	-0.05	-1.2	-0.94	-0.48	-0.63		-0.44	-0.28	0.42	0.33	-0.42	0.12	-1.06	-1.22		-0.77	-0.8	-0.9	-0.29	-0.9	-0.94	0.38		0.61	-0.25	-0.4	1.02	0.98	-0.92	0.42	0.47	0.67	-0.17
GENE5708X	IMAGE:1657762	311649 FLJ22415 hypothetical protein FLJ22415 Hs.135121 AI038014	1	0.35	0.96	-0.84		0.47	-1.21			0.12	1.04		-0.53	-0.78	-0.53	-2.58	-0.37	-0.28		-0.99	-0.15	-0.49	-0.12		0.27	0.71	-0.98	-0.87	0.35	-1.46	-0.88	-0.51	-0.06	-0.96	-0.38	0.1	0.71	-0.23	0.16	1.06	1.17	0.58	-0.26	-1.06	-1.5	-1.72
GENE2790X	IMAGE:139689	116073 ESTs Hs.28462 R63922	1	-0.15	0.76	-0.25	-0.18	0.34	-0.77	-0.13	-1.46	-0.23	0.4	0.06	-0.63	-0.66	-1.04	-0.71	-0.69	-0.6	-0.56	0.18	-0.47	-0.45	0.67	0.25	-0.22	0.28	-0.5	-0.09	0.16	-0.67	-0.71	-0.32	0.38	-0.76	-0.28	0.23	0.05	-0.02	0.3	0.05	0.57	-0.06	-0.04	-0.53	-0.64	-0.48	-1.77
GENE4207X	IMAGE:324717	222952 CFL2 cofilin 2 (muscle) Hs.180141 W47363	1	-0.35	0.48	-0.81	-0.45	-0.69	-0.24	-0.66	-0.61	-0.43	-0.08	0.06	-0.25		0.02	-0.11	-0.48	-0.45	0.2	0.16	-1.19	-0.15	0.37	-0.08	0.66	0.23	-0.92		0.03	-0.77	-0.89	-1.81	-0.95	-1.34	-0.02	0.19	-0.64	0.1	0.25	-0.45	0.67	0.03	-1.21	-0.36	-0.35	0.77	-0.15
GENE4499X	IMAGE:469177	224571 Homo sapiens cDNA FLJ11422 fis, clone HEMBA1001008 Hs.31412 AA026349	1	-0.05	0.91	-0.49	-0.51	-0.18	-0.23	-0.94	-0.97	0.09	-0.59			-0.74	-1.05	-0.59		-0.38		-0.39	-0.36	-0.77	0.57	-1.04	-0.16	-0.08	-0.64	-0.04	-0.28	-0.91	-1.58		-0.69	-0.72	0.98	0.12	-0.61	-0.82	-0.73	-1.07	0.53	1.18	-0.35	0.21	-0.46	0.06	-0.63
GENE4934X	IMAGE:471892	226969 Homo sapiens cDNA FLJ11422 fis, clone HEMBA1001008 Hs.31412 AA035171	1	0.05	1.93			-0.69	-0.69		-1.16	0.5	-1.31			-1.61	-1.16	-1.68		-0.49		-0.85	-1	-0.31	0.77	-1.62	-1.19	-0.01	-2.51	-1.33	-0.31	-1.88	-1.25	-1.02		-0.45	1.12	0.39	0.12	-0.68	-1.4	-1.05	1.53	1.39	-0.65	-0.25		-0.83
GENE4199X	IMAGE:461351	222919 TCF21 transcription factor 21 Hs.78061 AA699782	1	0.05	0.37		0.86	-0.68	-0.5	-0.74	-1.68	-0.08	0.38	-0.11	-1.4	-1.26	-0.89	-1.81		-0.47	-0.46	1.15	-0.91	-0.09	-0.28		-0.29	-1.29	-1.09		-0.97	-1.16	-1.78	-1.22	-0.84	-0.52	-0.7	-0.44	-0.74	1.22	-0.94	-0.55	0.12	0.09	0.19	-0.35	-0.87	-1.26	-1.5
GENE4435X	IMAGE:162310	224197 PMP22 peripheral myelin protein 22 Hs.103724 H26086	1	0.52	-0.06	-1.66	0.97	0.09	-1.09	-0.08	-0.47	-0.34	0.88	-0.58	-0.93	-0.8	0.36	-0.32	-0.14	0.28	-0.24	0.08	0.02	-0.3	-0.05	-0.74	-0.58	-0.04	0.09	-0.64	-0.6	-1.08	-0.63	-0.72	-1.02	-0.9	-0.72	-0.67	0.89	-0.28	-0.19	0.66	0.85	0.23	-0.39	-0.33	-0.36	0.09	-0.96
GENE1296X	IMAGE:133273	107552 PMP22 peripheral myelin protein 22 Hs.103724 R26732	1	0.36	-0.11	-0.97	0.73	-0.07	-1.42	-0.06	-0.5	-0.23	0.7	-0.36	-0.45	-0.63	0.37	-0.33	-0.06	0.1	-0.71	-0.29	0.5	0.42	0.08	-0.13	-0.17	0.07	-0.18	-0.81	0.1	-0.73	-0.63	-1.05	-0.47	-0.99	-1.23	-0.24	0.76	-0.49	-0.14	0.7	0.56	0.58	0.06	-0.28	-0.23	0.36	-1.24
GENE829X	IMAGE:486208	104753 TGFB3 transforming growth factor, beta 3 Hs.2025 AA040616	1	0.16	0.59	-0.41	-0.02	0.38	-0.27	-0.25	0.84	0.42	0.38	-0.86	-0.55	0.05	0.49	-0.59	-0.34	-0.12	-0.38	-0.65	-0.36	-0.28	0	-0.87	0.07	0	-0.58	-0.39	0.11	-0.26	-0.5	-1.04	-0.09	-0.42	-0.33	0.32	0	0.3	-0.59	0.14	0.21	-0.22	-0.2	-0.48	-0.05	0.09	-0.21
GENE3064X	IMAGE:1700582	117533 TGFB3 **transforming growth factor, beta 3 Hs.2025 AI049923	1	0.3	0.47	-0.87	-0.13	0.44	-0.51	-0.13	0.05	-0.44	-0.33	-0.31	-0.54	-0.95	0.27	-0.88		-0.57			-1.06	-0.36	-0.12	-0.02	-0.53	-0.02	-1.01	0.04	-1.07	-0.71	-0.63	-1.05	-0.21	-0.62	-0.37	0.07	-0.11	0.38	-0.37	0.18	0.4	-0.56	-0.06	-0.62	-0.09	-0.52	-0.1
GENE5030X	IMAGE:136668	306957 ESTs Hs.78293 R34875	1	-0.09		-0.57	-1.17	-1.18	-0.53	0.14	0.23	-0.3				0.29	-0.13	-1.49		0.37		0.65	0.13	-0.75	-0.75			0.13	-0.24	-0.31	0.1	-0.61	-0.47	-0.94	-0.97	-0.66	-0.41	-0.11	-0.11	-0.32	0.47	-0.7	0.49	-0.29	-0.51	-0.4	-0.94	-0.52
GENE386X	IMAGE:753248	102252 DAAM2 dishevelled associated activator of morphogenesis 2 Hs.100113 AA406231	1	0.01	-0.32	-0.21	-0.69	-0.61	-0.5	-0.33	1.76	-0.84	-0.12	2.23	-0.34	0.03	-0.81	-0.73	-1.2	-0.27	0.1	0.24	-0.26	-0.42	-0.27	-0.06	0.24	0.14	-0.37	-0.05	-0.12	-0.68	-0.62	-0.68	-0.63	-0.63	-0.96	-0.12	-0.21	-0.12	-0.07	-0.7	0.07	0.14	-0.68	-0.45	-0.7	-1.21	-1.07
GENE1979X	IMAGE:753907	111509 Homo sapiens mRNA; cDNA DKFZp434G227 (from clone DKFZp434G227) Hs.7378 AA479351	1	-0.37	0.11	-0.6	-0.57	1	-0.14	-0.11	-0.63	-0.02		-0.17	0.42	-0.32	-0.37	-1.34	0.46	0.04	-0.48	-0.12	-0.18	-0.29	0.26	-0.01	-0.64	-0.16	-0.39	-0.48	0.2	-0.58	-0.45	-1.74	-0.96	-0.98	-0.9	0.71	0.67	0.21	0.91	-0.5	0.72	0.57	-0.64	-0.49	-0.37	-1.62	-0.85
GENE4909X	IMAGE:743829	226855 LOC56963 hypothetical protein from EUROIMAGE 363668 Hs.271277 AA634385	1	0.35	0.17		0.53	-1.21	-0.69	-0.55	-0.74	-1.18	-0.66		-1.45	-0.58	-1.31	-2.1	-1.88	-0.42	-1.23		-0.78	-1.15	0.27	0	0		-1.06	-0.33	-0.52	-0.54	-1.75	-0.73	-0.58	-0.24	0.17	1.16	-0.04		-0.64	-0.4	0.58	0.85	-0.33	-0.65	-0.67	0.74
GENE6040X	IMAGE:1741841	315953 Homo sapiens mRNA; cDNA DKFZp586C0721 (from clone DKFZp586C0721); partial cds Hs.149356 AI191523	1	-0.41	0.18	-0.93		-0.47	-1.03	-1.06	-0.07	0.37	-0.36	-0.28	-1.01	-0.94	-0.42	-1.15		0.11	-0.44	-0.33	-0.14	-0.75	-0.4	0.59	0.37	-0.03	-1.03	-0.37	0.24	-0.77	-0.91	-1.13	-0.48	-0.51	0.03	1.07	-0.06	0.1	-0.73	-0.2	0.53	0.8	-0.33	0.99	-0.7	-0.82
GENE2819X	IMAGE:810934	116211 WDR1 WD repeat domain 1 Hs.85100 AA459308	1	-0.24	0.02	-0.53	-0.4	-0.24	-0.31	-0.36	1.23	-0.53	0.59		-0.38	-0.7	0		-0.85	0.27	0.79	-0.06		-0.78	-1.16	-1.14	-0.77	0.05	-0.91	-1.06	-0.81	-1.04	-0.75	-0.59	-0.85	-0.88	-0.34	0.16	-0.7	-0.69		-0.46	-0.12	-0.28	-0.52	0.08	0.02	-0.45	-0.41
GENE640X	IMAGE:767181	103586 DKFZP564G202 DKFZP564G202 protein Hs.6909 AA424574	1	0.37	-0.47		0.45	-0.6	-0.83	-0.12	-0.75	-1.03	1	0.06	-1.07	-0.89	-0.56	-1.93		0.23	-0.68	-0.31	-0.99	-0.47	-0.24	-0.47	-0.29	-0.71	-0.76		0.02	-0.85	-1.18	-0.32	-0.44	-0.65	-0.31	0.14	-0.68	0.05	-0.97	-0.41	0.23	0.53	0.24	0.87	0.13	-0.74	-1.08
GENE3501X	IMAGE:789012	120182 FBLN2 fibulin 2 Hs.198862 AA452840	1	0.53	0.03	-0.97	0.38	-0.52	-0.7	0.69	-0.4	0.63	1.12	-0.01	-1.07	-0.73	-1.01	-1.34	0.12	-0.12	-0.19	-0.21	-1.21	-1.51	-0.74	-0.18		-0.35	-0.23	-0.97	-0.21	-0.58	-0.91	-0.97	-0.44	-0.9	-0.98	-0.9	0.16	0.28	-0.17	0.58	0.66	0.12	-0.5	-0.35	0.14	-0.93	-1.06
GENE3381X	IMAGE:471642	119498 LAMA2 **laminin, alpha 2 (merosin, congenital muscular dystrophy) Hs.75279 AA034938	1	0.52	-0.16	-0.36	0.12	-0.21	-0.41	-0.15		0.3	0.31	-0.98	-0.79	-0.88	0.9	-1		-0.37		-0.64	-1.14	-0.45	-1.13	-0.53	-0.39	-0.78	-0.66	-1.22	-0.26	-1.01	-1.53	-0.91	-0.76	-0.61	-0.32	-0.06	-0.58	-0.3	-0.49	-0.31	-0.5	0.33	0.15	-0.08	-0.19	-0.72	-1.44
GENE2681X	IMAGE:81409	115404 GABARAPL1 GABA(A) receptor-associated protein like 1 Hs.336429 T60160	1	0.03	-0.19	-1.28	0.11	-0.06	-0.44	-0.49	0.95	0.67	-0.03	-1	-0.41	-0.78	-0.44	-1.27	-0.51	-0.33	0.28	-0.43	-0.47	-0.05	-0.35	-0.27	-0.67	-0.74	-0.63	-0.81	-0.65	-1.1	-1.05	-0.52	-0.71	0.03	-1.17	-0.51	0.85	0.02	-0.31	-0.58	0.13	0.12	-0.52	-0.58	-0.47	-0.68	-1.74
GENE3068X	IMAGE:501868	117547 RAI2 retinoic acid induced 2 Hs.49597 AA128005	1	0.12	-0.24			-0.33	-0.43	-1.15		-0.14	-0.28	-0.68	-0.36	-1.21	-0.51	-0.8		-0.93		0.05	-0.04	-0.65	-0.21		-0.95	-0.85		-0.66	-0.39	-1.14	-1.18	-1.12	-0.58	0.56	-0.85	-0.27		-0.89	-1.13	-0.45	-0.26	1.48	-0.83	-0.54	-0.51	0.41
GENE3406X	IMAGE:796328	119666 ESTs Hs.247150 AA459734	1	-0.57	-0.63	-0.05			-0.06	-0.06	0.99	-0.04			-0.38	0.48	-0.69	-0.82		-0.57		0.72	-0.57	-0.75	-0.18	-0.52	-0.28	-0.44	-1.1	-0.96	-0.52	-0.9	-1.34	-1.19	-1.46	0.61	0.81	-0.05	0.62	0.8	-0.57		0.16	0.12	-0.43	0.3	-0.58		0.76
GENE2577X	IMAGE:898133	114871 ESTs Hs.351108 AA598500	1	-0.62	0.16	-1.43	-0.52	-1.18	-0.52	-1.14		-0.14	0.35	-1.1	-1.44	2.23	-0.38	-0.28		-0.24	-1.56	0.2	-0.6	-0.54	-0.15		-0.21		-1.75	-1.61	-1	-0.96	-0.71	-2.18	-1.99	1.34	-0.64	-0.14	-0.37	1.63	-1.48	-1.16	-0.34	0.85	-0.49	-0.32	-0.94	-0.85	-1.18
GENE1302X	IMAGE:838611	107599 APOD apolipoprotein D Hs.75736 AA456975	1	-0.39	0.29	-1.65	-0.67	-1.37	-0.91	-0.99	0.67	0.27	1.91	-1.43	-2.15	2.87	-0.72	-1.76	-5.66	0	-2.08	0.85	-1.25	-1.81	-0.02	-1.86	-0.48	-0.07	-1.56	-2.02	-0.91	-1.43	-2.15	-2.55	-1.95	1.63	-1.26	-0.01	-0.06	1.72	-1.46	-1.21	0.13	0.8	-0.65	-0.14	-1.48	-1.82	-1.26
GENE470X	IMAGE:159608	102660 APOD apolipoprotein D Hs.75736 H15842	1	-0.34	0.24	-1.03	-0.37	-0.59	-0.43	-0.35	0.3	0.73	1.69	-1.2	-1.65	2.3	-0.8	-1.36	-2.5	0.2		0.47	-0.68	-1.26	-0.3	-2.51	-0.83	-0.16	-0.65	-1.79	-1	-1.28	-1.69	-0.99	-1.26	1.23	-1.25	-0.12	0.23	1.36	-0.95	-0.88	0.24	0.17	-0.69	-0.07	-1.02	-1.48	-1.35
GENE6564X	IMAGE:131979	99266 EPAS1 endothelial PAS domain protein 1 Hs.8136 R24882	1	-0.08	0.26	-0.7	0.15	-0.11	0.53	-0.22	0.48	0.25	-0.11	-0.11	-1.75	-0.36	-0.41	-0.51	-0.05	0.44	-0.41	0.54	-0.1	-0.22	-0.79	-0.32	-0.35	-0.53	-0.46	-1.31	0.04	-1.57	-1.02	-1.04	-0.41	-0.51	-1.96	-0.53	-0.17	-0.09	-1.23	-0.12	0.16	-0.2	-0.08	-0.42	0	-1.04	-1.06
GENE2847X	IMAGE:869187	116365 EPAS1 endothelial PAS domain protein 1 Hs.8136 AA680300	1	-0.07	-0.03	-0.62	-0.08	-0.07	0.6	-0.46	0.46	0.24	0.31	-0.16	-1.53	-0.34	-0.59	-0.55	-0.15	0.13	-0.53	1.04	0.05	-0.53	-0.38	-0.24	-0.28	-0.42	-0.21	-1.12	0.02	-1.17	-1.17	-0.85	0.01	-0.43	-1.75	-0.49	-0.11	0	-1.03	-0.37	0.21	-0.51	0.18	-0.15	0.1	-0.72	-1.23
GENE2459X	IMAGE:144797	114187 ADAMTS1 a disintegrin-like and metalloprotease (reprolysin type) with thrombospondin type 1 motif, 1 Hs.8230 R76276	1	-0.23	0.64	-0.44	-0.21	-0.51	-0.83	-0.65	-1.11	-0.79	0.47	-0.95	-0.57	-0.37	-0.09	-0.49	-0.73	-0.19	-0.89	0.55	-0.69	0.27	-0.15	-1.02	-0.6	-0.14	-0.9	-0.64	-0.28	-0.75	-1.36	-1.62	-1	-0.48	-1.48	-0.31	0.24	0.46	-0.24	-0.79	0.07	-0.47	0.57	-0.16	0.6	-0.47	-0.78
GENE1341X	IMAGE:472185	107787 ADAMTS1 a disintegrin-like and metalloprotease (reprolysin type) with thrombospondin type 1 motif, 1 Hs.8230 AA057170	1	-0.3	0.68	-0.71	-0.43	-0.5	-1.06	-1.01	-1.11	0.01			-0.6	-0.5	0.02	-0.54	-0.8	-0.05	-0.94		-0.37	0.54	-0.45	-0.55	-0.57	0.14	-1	-1.34	-0.1	-1.29	-1.24	-1.82	-1.19	-0.7	-1.69	-0.41	-0.4	0.71	-0.41	-0.81	0.47	-0.67	0.6	-0.18	0.43	-0.66	-0.72
GENE3074X	IMAGE:781468	117588 DKFZP434F0318 hypothetical protein DKFZp434F0318 Hs.23388 AA431105	1	-0.51	0.16	-1.49	0.15	0.13	-0.57	-0.63	-0.04	-1.09	-1.07	0.36	-0.29	-0.41	0.01	1.05	-1.09	-0.3	0.12	0.61	0.44	0.31	-0.52		-0.47	-0.29	-0.16	-1.04		-0.85	-0.52	-1.2	-1.41	-0.52	-1.52	-0.38	-0.02	0.14	-0.5	-0.08	-0.2	0.02	0.48	-0.21	0.35	-0.42	-0.57
GENE5687X	IMAGE:1703518	311329 AI160214	1	0	0.08	-1.09		-0.25	-0.54	-0.55	-0.85	-0.09	0.29		-0.8	-0.86	-0.88	-1.03		-0.6	1.09	0.36	0.38	-0.47	-0.94	-0.53	-0.72		-0.81	-0.6	-0.78	-0.68	-0.73	-0.82	-1.05	-0.26	-0.72	-0.49		-0.9	-0.8	-1.1	-0.4	-0.03	-0.53	-0.89		0.13
GENE3425X	IMAGE:310138	119769 FOXF2 forkhead box F2 Hs.44481 N98485	1	0.42	-0.04	-0.47		-0.41	-0.3		-1.24	0.19		-0.8		-0.78	-1.55	-0.18		-0.27		0.06	1.28	-0.32	-0.25	-0.88	-0.69	-0.71	-0.86	0.05	-0.26	-0.65	-0.57		-0.34	-0.37	-0.53	-0.59		-0.65	-0.29	-0.5	-0.14	-0.14	-0.06		-0.91	-0.91	-0.57
GENE1209X	IMAGE:178950	107105 SYN1 synapsin I Hs.225936 H48153	1	0.05	-0.09	-0.84	0.1	-0.32	-0.08	-0.49		-0.36	-0.26	0.33	0.15	-0.46	-0.76	-0.8		-0.71	-0.05	0.31	1.54	-0.53	-0.14	-0.41	-0.47	-0.41	-1.14	-0.24	-0.48	-0.75	-0.76	-0.09	-1.04	0.05	-0.58	-0.32	-0.31	-0.32	-0.44	-0.3	-0.04	0.63	-0.25	-0.26	-0.83	-0.64	-0.64
GENE2818X	IMAGE:139766	116208 DIO2 deiodinase, iodothyronine, type II Hs.154424 R62138	1	0.01	-0.69	-1.5	1.07	0.01	-0.82	0.78	-0.96	0.03	0.12	-0.22	-1.23	-1.71	-1.12	-1.77		0.62	0.89	-0.4	0.1	-0.23	0.37		-0.63	-1.39		-0.67	-0.37	-1.29	-0.73	0.34	-1.04	-0.11	0	-0.11	0.22	-0.6	-1.14	0.99	0.67	1.92	0.63	-0.08	-2.06	-1.61	-1.77
GENE4869X	IMAGE:489668	226632 GJA7 gap junction protein, alpha 7, 45kD (connexin 45) Hs.43761 AA099541	1	-0.13	-0.03	-1.34	-0.59	0.5	0.71	0.48	-0.84	-0.21			-0.44	-0.35	0.09			0.09	0.53	0.6	-0.47	-0.02	0.69	-0.04	0.17	-0.41	-0.93	-1.18	-0.24	-0.95	0.05	-0.21	-0.25	-0.43	-0.91	0.13	0.89	-0.16	-1.13	-0.3	0.65	-0.57	0.09	-0.14	-0.19	-0.26	-0.99
GENE4418X	IMAGE:50282	224143 MAP1B microtubule-associated protein 1B Hs.103042 H17493	1	-0.61	0.36	-1.25	-0.79	-0.29	-0.93	-0.2	0.23	-0.16	0.07		1.9	-0.58	0.06	-0.37		-0.53	-0.33	0.45	-0.72	-0.47	0.33	-0.23	-0.01	-0.56	-1.87	-1.22	0.07	-0.73	-0.53	-0.98	-0.53	-0.78	-0.59	0.58	1.32	0.27	-1.45	-0.42	0.12	0.2		0.29	0.46	-0.4	-0.39
GENE4192X	IMAGE:450382	222885 SLIT3 slit homolog 3 (Drosophila) Hs.57929 AA703652	1	0.21	0.47	0.17	-0.27	0.05	-0.33	-0.21	0.23	-0.88	-0.81	0.41	0.48	-0.7	-0.7	-0.54		-0.62	-0.47	-1.12	-0.31	-0.18	0.19				-0.84	-0.38	-0.58	-0.57	-1.1	-0.32	-1.02	-0.68	-0.78	0.01			-0.92	-0.28	-0.03	-0.2	-0.45	-0.91	-0.26	-0.83	-0.45
GENE1558X	IMAGE:192225	108994 SLIT3 slit homolog 3 (Drosophila) Hs.57929 H41160	1	0.31	0.69	0.18		0.63	-0.5	-0.2	1.24	-0.53		1.9	-0.15		-0.58	-0.32	-0.54	-0.36		0.03	-0.03	0.09	-0.97	-0.97	-1.13	-0.51	-0.67	-1.17	-0.36	-0.99	-1.22		-1.26	-0.83	-1.25	0	-0.94	-0.56	-0.96	-0.48	0.1	-1.35	-0.54	-0.56	-0.41	-0.41	-0.27
GENE3648X	IMAGE:287327	161407 IGF1 insulin-like growth factor 1 (somatomedin C) Hs.85112 N69062	1	-0.49	1.61	-1.17	0.26	0.49	-0.76	-0.69	1.05	-1.49	0.18		0.14	-1.21	-0.9	0.37		-1.18	-1.28	-0.97	-0.71	0.24	-1.06		-0.79	-1.04				-1.12	-1.78	-1.12	-1.65		-0.99	0.43	-0.91	0.41	-1.69	-1.04	-0.24	0.57	-0.12	-0.97	-0.08	-0.37	-0.46
GENE669X	IMAGE:131563	103772 Homo sapiens cDNA FLJ13443 fis, clone PLACE1002853 Hs.56123 R24223	1	-0.24	-0.28	-0.91	-0.87	-0.32	-0.64	-0.03	1.98	1.07	0.44	0.69	-0.4	0.01	-0.46		-0.85	-0.15	0.68	0.76	-1.11		0.09	-0.52	-0.84	-0.74	-1.01	-1.12	-0.42	-1.26	-0.98	-1.06	-0.78	-0.73	-1.16	-0.09	1.43	-0.34	-0.65	-0.43	0.11	0.31	-0.64	-0.1	0.49	0.13	-1.13
GENE2858X	IMAGE:162199	116425 PTPRM protein tyrosine phosphatase, receptor type, M Hs.154151 H26353	1	0.07	-0.03	-0.86	-0.78	0	-0.43	-0.59	0.87	-0.13	0.01	-0.41	-0.49	-0.64		-0.67		0.12	0.91	0.08	0.05	-0.37	-0.35	-0.58	-0.24	-0.33	-0.31	-1.09	-1.11	-0.55	-0.67	-1.18	-0.67	-0.89	-1.65	0.11	0.68	-0.13	-0.07	-0.25	0.36	-0.62	-0.63	-0.35	-0.25	-0.21	-1.22
GENE1955X	IMAGE:292522	111312 ESTs Hs.38022 N68463	1	0.31	0.41	0.37	-0.59	-0.28	-0.28	-0.31	2.13	-0.71	0.05	0.5	-0.88	-0.13	-1.07	-1.02	-1.88	-0.66	-1.13	-0.4	-0.51	-0.52	-0.03	0	0.38	0.13	0	-0.81	0.05	-0.52	-1.06	-1.51	-1.25	-1.03	-0.18	-0.09	1.2	0.72	-0.07	-1.32	0.31	-0.33	-0.31	-0.63	1.05	-0.64	-0.24
GENE219X	IMAGE:784772	101310 AKAP12 A kinase (PRKA) anchor protein (gravin) 12 Hs.788 AA478542	1	0.24	0.38	-0.05	-0.74	-0.62	-0.45	-0.63	1.45	0.31	0.13		0.09	0.2	0.12	-1.02	-1.61	0.21	-0.4	-0.13	-0.8	-0.55		0.47	0.13	0.36	0.02	-0.04	0.68	-0.73	-1.43	-0.95	-0.92	-0.83	0.08	0.1	1.4	1.12	0.34	-0.44	0.85	-0.03	-0.53	-0.37	1.11	-0.89	-0.81
GENE4052X	IMAGE:683059	222117 CEP3 **Cdc42 effector protein 3 Hs.260024 AA213816	1	0.06	-0.19	0.08	-1.15	-0.4	-0.18	-0.07	1.86	0.2	0.13	0.89	0.84	-0.08	0.24	0.71	-1.9	0.38		-0.42	-0.46	-0.26	0.5	0.23	-0.01	0.41	0.2	-0.9	-0.19	-0.54	-0.2	-1.58	-0.95	-0.59	-1.47	0.19	0.11	0.81	0.02	-0.46	-0.16	-0.14	-0.69	0	-0.5	-1.05	-1.19
GENE2355X	IMAGE:284100	113533 COLEC12 collectin sub-family member 12 Hs.29423 N53421	1	0.41	0.1	0.1	-0.59	-0.11	-0.19	0.16		-0.76	0.26		0.07	0.23	0.27	-0.48	-1.48	0.3	-1.58	-1.05	0.24	0.04	-0.73	-0.19	0.62	0.39	-0.21	-0.15	0	-0.7	-0.17	-1.42	-0.28	-0.84	-0.48	0.21	0.34	0.36	0.39	-0.04	0.56	0.02	-0.63	-0.17	-0.25	-0.52	-1.07
GENE3312X	IMAGE:814798	119033 ALDH1A3 aldehyde dehydrogenase 1 family, member A3 Hs.75746 AA455235	1	0	0.23	-0.87	0.39	-0.09	-0.46	0.14	-0.49	0.31	-0.64	-0.38	-1.36	-1.07	0.75	-2.1	-1.83	-0.12	0.47	-0.11	-1.28	-0.12	-0.03		-0.29	-0.8	-1.42	-1.24	0.04	0.1	-0.09	-0.63	-0.87	-0.05	-0.34	0.33	0.83	0.84	-1.02	-0.67	1.15	1.08	1.13	0.2	-0.24	0.97	-0.66
GENE4361X	IMAGE:487764	223863 Homo sapiens, clone IMAGE:4182947, mRNA Hs.16193 AA045174	1	-0.44	-0.46	-0.26	-0.46	0.02	-0.25	0.34	1.42	-0.86	-0.26	0.32	-0.23	-1.67	-1.55	-0.82		0	0.14	0.04	-1.45	-0.44	-0.65				-0.54			-0.77	-0.93	-0.78	-1.22	-0.6	0.04	-1.1	0.42	-1.32	-0.59	-0.08	0.66	0.14	-0.46	-0.02	-0.12	-0.39	-0.45
GENE6501X	IMAGE:487117	98915 OGN osteoglycin (osteoinductive factor, mimecan) Hs.109439 AA045327	1	-0.51	-0.02	-1.31	0.36	-0.45	-0.37	0.51	-0.88	-0.78	-0.12		-0.4		-0.72	-0.92	-1.68		-1.28		-0.18	-1.09	-0.38		0.51			0.14	-0.94	-0.61	-0.85	-1.15	-0.61	-0.35	0.07	0.92	-0.03	0.11	0.34	-0.03	0.25	0.49	0.14	0.06	-0.47	0.2
GENE474X	IMAGE:503819	102687 FLJ20277 O-linked mannose beta1,2-N-acetylglucosaminyltransferase Hs.183860 AA131664	1	0.02			-0.29	-0.32	-0.37	-0.68	0.64			-0.45	-0.64	-0.3	-0.2	-0.37		-0.12		-0.54	-0.33	-0.5	-0.62	-0.21	-0.22	-0.13	-0.03	-0.4	-0.65	-0.33	-0.66	-0.57	-0.39	-0.67	-0.36	-0.13	-0.37	-0.13	-0.28	-0.43	-0.16	0.28	-0.34	0.12	-0.23	0.99
GENE1014X	IMAGE:837870	105859 PRELP proline arginine-rich end leucine-rich repeat protein Hs.76494 AA434067	1	-0.46	-0.42	-0.47	-0.2	-0.72	-0.25	0.27	2	0.32	-0.85	-0.42	-0.65	-0.58	-0.58	-0.59	-1.09	-0.27	-1.11	-0.38	-0.94	-0.93	-0.2	-0.91	-0.87	-0.52	-0.5	-0.71	-0.82	-0.47	-1	-0.78	-1.09	-1.02	0	-0.21	-0.62	-0.43	-0.83		0.81	0.62	-0.86	0.34	0.8	1.93	-0.51
GENE6658X	IMAGE:773771	99857 PLN phospholamban Hs.85050 AA427940	1	-0.21	0.35	-0.8	-0.31		-0.29	-0.06	-0.31	0.52	-0.82		-0.04	-0.44	0.92	-0.45	0.84	-0.29	0.45	-0.13	-0.53	-0.45	0.79	-0.07	-0.36	-0.31	-0.29	0.37	-0.14	-0.51	-0.78	-0.28	0.43	-0.12	0.13	0.2	-0.54	-0.45	-0.47	-0.02	0.49	0.71	-0.53	0.41	-0.22	-0.27	-0.2
GENE3805X	IMAGE:700517	220584 Homo sapiens cDNA FLJ30652 fis, clone DFNES2000011 Hs.5724 AA291159	1	-0.39	0.44	-0.15	0.6	0.11	0.33	-0.38		0.01		-0.05	-1.02	-0.04	0.24	-0.4	0.57	0.26		0.76	-0.56	0.15	-0.25		-0.32	-0.48	-0.53	-0.62	0.12	0.07	-0.18	-0.21	-0.21	-0.1	0.34	0.25	-0.08	-0.08	-0.36	0	0.61	1.1	-0.01	0.2	-0.66	-1.21	-0.16
GENE3748X	IMAGE:278523	220243 SLMAP sarcolemma associated protein Hs.4007 N66156	1	-0.25	0.38	-0.47	0.01	0.19	-0.26	0.12	-0.67	-0.14	-0.33	-0.27	-0.28	0.11	0.61	-0.25	0.2	0.45	-0.5	0.13	-0.63	-0.06	0.04	-0.34	0.49	-0.62	0.28	0.04	0.24	-0.3	-0.34	-0.1	0.46	-0.08	0.99	0.4	-0.45	0.27	0.67	-0.23	0.15	0.16	-0.32	-0.06	-0.13	-0.42	-0.57
GENE5069X	IMAGE:1592021	307158 HFL1 H factor (complement)-like 1 Hs.278568 AA953249	1	0.42	0.74	0.13	-0.84	-0.29	-0.66	-1.21	-0.38	-0.72	-0.03	-0.42	-1.26	-0.65	-0.22	-1.02	-1.11	-0.36	1.78	0.02	-1.53	-0.59		-0.49	-0.82	-0.69	-0.75	-1.53	-0.41	-1.94	-1.93		0.95	-0.74	-0.27	-0.14	-1.11	0.4	-0.41	-0.31	-0.82	-0.85	-0.24	-0.31	0.9	-1.17	-0.94
GENE6122X	IMAGE:2312765	317130 HF1 H factor 1 (complement) Hs.250651 AI669507	1	0.41	0.01	0.01	-1.12	-0.51	-1.15	-0.79	-0.29	-1.12		-0.78	-1.79	-0.96	-0.92	-0.97	-0.81	-0.74	0.95	0.09	-1.38	-0.95	-0.7	-0.74	-0.88	-0.78	-1.26	-0.94	-1.04	-0.84	-0.63	0.17	0.25	-0.9	-0.39	-0.69	-0.83	-0.15	-0.52	-0.26	-1.05	-0.47	-0.65	-0.4	0.45	-1.18	-0.52
GENE3124X	IMAGE:417300	117895 HFL1 H factor (complement)-like 1 Hs.278568 W88788	1	0.49	1.21	1.71	0.13	0.09	0	0.22	0.03	-1.36	-0.53		-1.14	-1.84	-1.46	-1.01	-1.19	-0.02	1.32		-0.77	-0.55	-1.41	-1.03	-0.63	-0.15	-1.09		-0.57	-1.33	-1.55	0.75	0.88	-1.37	-1.06	-0.35	-0.28	0.57		0.74	-0.44	-0.55	-0.27	-0.72	-0.08		-1.31
GENE1975X	IMAGE:293819	111480 LOC56898 **oxidoreductase UCPA Hs.124696 N65985	1	-0.04	-0.24	0.03	0.75	0.5	0.64	-0.26	0.68	-1.08	-0.14	0.66	-1.6	-0.54	0.46	-0.02	-0.68	-0.48	-0.13	0.08	-1.24	-0.25	-0.44		-0.39	-0.66	-0.9	-0.43	-0.75	-0.39	-0.77	-1.08	-0.41	0.11	1	-0.07	-0.43	-0.17	-0.4	-1.04	-0.68	0.06	-0.22	-0.64	-0.93	-0.86	-0.64
GENE1742X	IMAGE:272262	110036 Homo sapiens cDNA FLJ30904 fis, clone FEBRA2005824 Hs.7913 N35592	1	-0.2	0.13	0.02	-0.34	0.63	-0.29	-0.04	-0.2	-0.42	0.81	0.4	0.12	-0.39	-0.52	-0.61	-1.38	-0.38	-0.26	-0.53	-0.08	0.29	-0.5		-0.52	-0.67	-0.05	-0.83		-0.96	-0.63	-1.35	-0.36	-1.15	-0.2	-0.82	-0.02	0.09	-0.67	-0.21	-0.14	-0.55	-0.96	-0.27	-0.64	-0.07	0.15
GENE2117X	IMAGE:811162	112254 FMOD fibromodulin Hs.230 AA485748	1	0.98	-0.51	-2	1.32	0.43	2.71	-0.04	1.81	-0.8	-0.25	-0.36	-1.63	-1.43	-0.73	-2.81		-0.09	-0.09	-0.99	-0.54	-1.12	0.3	-1.47	-0.58	-0.17	-1.57	-1.22	-1.46	-1.92	-1.22	-0.56	-1.14	-1.28	-1.39	-0.36	-0.55	-0.36	-1.22	-0.28	-0.44	1.87	-0.64	-0.67	-0.54	1.23	-0.93
GENE2100X	IMAGE:23173	112155 MAPK10 mitogen-activated protein kinase 10 Hs.151051 R39221	1	-0.21	0.55	-0.49	-0.43	0.34	0.03	-0.25	-0.45			-1.33	-0.56	-0.84	-0.74	-1.02		-0.6		-0.1	-0.37	-0.24	0.48		-0.64		-0.73	-1.34	-0.39	-0.51	-0.15	-0.45	-0.59	0.08		0.49	0.03	-0.24	-0.74	-0.67	0.55	0.21	-0.31	0.05	-0.29		-0.61
GENE202X	IMAGE:447786	101187 KIAA0442 autism-related protein 1 Hs.32168 AA702350	1	-0.27	-0.71	-0.76	-0.76	-0.38	-0.95	-0.3	0	0.82	0.8	-0.93	0.18	-1.64	0.17	-0.32	0.23	-0.07	-0.15	-0.61	-0.44	-0.76	0.45	-1.18	-0.43	1.11	-0.31	-0.84	0.85	-1.07	-0.85	-0.97	-0.13	-0.1	-1.43	-0.29		-0.96	-1.14	-0.01	0.67	0.8	1.23	0.49	0.2	0.7	-1.26
GENE5052X	IMAGE:2011066	307055 MMP19 matrix metalloproteinase 19 Hs.154057 AI361112	1	-0.78	-0.2	-1.74	-0.7	0.3	-1.64	0.63	-1.45		-0.27	-1.45	-1.29	-0.54	-0.6	-0.18	-0.03	0.53		-0.47	-1.53	-0.61	-1.15	-0.77	-0.22	-0.58	0.03	-0.89	-1.14	-1.72	-1.34	-0.67	-0.3	-1.49	-0.94	0.36	-0.65	-0.12	-0.69	0.02	0.2	-1.29	0.43	-0.4	1.67	0.17	-0.05
GENE5096X	IMAGE:1589468	307343 EMP1 epithelial membrane protein 1 Hs.79368 AA975768	1	0.45	0.12	-1.27	1.04	-0.1	-0.94	-0.01	-1.41	-0.38	1.11	-1.17	-1.36	-0.71	-0.69	-1.36	1.16	-0.21	0.97	-0.25	-1.27	-0.26	-0.49	-0.35	0.75	0.17	0.19	-1.1	-0.04	-1.08	-1.59	-0.59	-0.42	-0.67	0.59	0.29	1.01	1.75	0.83	-0.12	0.5	0.14	0.34	0.36	0.73	-0.16	-1.42
GENE4439X	IMAGE:433491	224226 Homo sapiens cDNA FLJ14787 fis, clone NT2RP4000878, highly similar to MYELOID UPREGULATED PROTEIN Hs.250700 AA699589	1	-0.13	0.17	-0.99	-0.42	0.84	-0.28	-0.08	0.27	0.86	-0.67	-1.3	0.01	-0.59	-0.37	-0.87	0.18	-0.09	0.19	0.34	-0.25	0.35	0.01	0.16			-0.3	-0.91	0.06	-0.41	-0.33	-0.21	-0.19	-0.78	0.27	-0.27	0.72	0.18	0.24	-0.51	0.62	0.25	0.04	-0.16	0.21	-0.29	-1.3
GENE3795X	IMAGE:506016	220529 Homo sapiens cDNA FLJ14787 fis, clone NT2RP4000878, highly similar to MYELOID UPREGULATED PROTEIN Hs.250700 AA708440	1	0.03	0.52	-1.22	-0.49	0.95	-0.58	-1.06	0.29	0.83	-0.02	-0.24	0.16	-0.72	-0.24	-0.92	0.39	-0.1	0.27	0.48	-0.38	0.07	-0.08	-0.23	-0.12	-0.45	-0.23	-1	-0.22	-0.76	0.06	-0.44	-1.14	-1.06	0.14	-0.4	0.42	0.43	-0.34	-0.33	1.09	0.09	0.04	-0.26	-0.33	-0.13	-0.92
GENE5944X	IMAGE:1567676	314511 Homo sapiens cDNA FLJ14787 fis, clone NT2RP4000878, highly similar to MYELOID UPREGULATED PROTEIN Hs.250700 AA976212	1		0.8	-0.98	-0.33	0.93	-0.66	-1.06	0.42	1.13	-0.26	-0.3	0.12	-0.57	-0.01	-0.91	0.55	0.25	0.34	0.3	-0.07	0.58	-0.02	-0.52	-0.2	-0.41	-0.12	-0.7	0.39	-0.51	0	-0.88	-0.7	-1.06	0.03	-0.25	0.46	0.36		-0.47	0.82	-0.66	-0.03	-0.32	0.06	-0.71	-1.32
GENE510X	IMAGE:489495	102861 Homo sapiens cDNA FLJ14787 fis, clone NT2RP4000878, highly similar to MYELOID UPREGULATED PROTEIN Hs.250700 AA099138	1	0.33	0.67	-0.69	-0.55	0.7	-0.56	-0.94	0.35	0.94	-0.4	-0.67	0.16	-0.34	-0.18	-0.82	0.47	0.22	0.44	-0.04	0.06	0.39	0.25	-0.33	0.3	-0.28	-0.33	-0.53	-0.08	-0.28	-0.36	-0.52	-0.37	-0.92	0.55	-0.47	0.68	0.21	-0.32	-0.56	0.99	0.41	0.03	0.01	0.25	-0.3	-0.84
GENE4320X	IMAGE:261444	223603 Homo sapiens cDNA FLJ14787 fis, clone NT2RP4000878, highly similar to MYELOID UPREGULATED PROTEIN Hs.250700 H98981	1	0.24	0.9		-0.39	0.75	-0.59	-1.43	0.67	0.87		-0.14	0.15		0.01	-0.55	0.78	0.46	0.33	0.26	-0.12	0.27	0.2	-0.29	-0.29	-0.36	-0.66	-0.4	-0.86	-0.49	0.01	-0.34	-1.01	-0.83	0.75	-1	0.96	0.43	0.03	-0.53	1.19	0.25	-0.06	0.09	0.01	-0.28	-0.85
GENE5305X	IMAGE:2028725	308621 ACK1 activated p21cdc42Hs kinase Hs.153937 AI262140	1	0.51	0.09	-0.04	0.75	0.26	-0.64	-0.83		0.14	0.78		2.45	-0.63	-0.9	-1.01		-0.1	-0.72	-0.18	0.83	0.53	-0.26	-1.42	-0.6	-0.55	-0.71	-0.38	0.5	-0.04	-0.37	-0.44	-1.03	-0.62	-0.62	-0.26	-0.15	-0.41	-0.72	-0.31	-0.13	0.65	0.46	-0.43	1.11	-1.07	-1.33
GENE5369X	IMAGE:2018758	309105 PEX7 peroxisomal biogenesis factor 7 Hs.79993 AI360264	1	0.54			0.74	0.49	-0.2	-0.15	-0.48	0.11	0.94		2.28	-0.23	-0.75	-0.4	-1.78	-0.3	-0.66	-0.09	0.73	-0.09	-0.4	-1.16	-0.38	0.2	-0.14	-0.43	0.71	-0.36	-0.52	-0.5	-0.89	-0.69	-0.8	-0.65	-0.75	-0.39	-0.38	-0.33	-0.44	0.69	0.33	-0.5	0.79	-1.13	-0.34
GENE330X	IMAGE:210789	101925 AGT **angiotensinogen (serine (or cysteine) proteinase inhibitor, clade A (alpha-1 antiproteinase, antitrypsin), member 8) Hs.3697 H64379	1	0.37	0.57	-3.61	1.23	-0.45	-0.27	-1.72	-0.82	1.04	1.51	0.77	3.92	-1.93	-0.64	-2.99	-3.96		-0.53	1.1	1.16	0.21	-0.12	-0.89	-0.34	-0.61	-3.1	-2.63	0.67	-0.34	-0.28	-0.22	-2.43	-0.45	-0.85	-0.59	-1.13	-1.05	-1.74	-0.04	-0.32	1.1	0.13	-0.37	2.05	-2.14	-2.02
GENE4462X	IMAGE:1573778	224359 C11orf13 chromosome 11 open reading frame 13 Hs.72925 AA970526	1	0.54	0.46	-1.19	1.33	-0.11	-0.45	-1.57	-0.83	1.01	1.2	0.82	3.55	-1.31	-0.72	-2.52	-4.96	0.32	-0.58	1.18	1.02	0.05	-0.32	-1.27	-0.49	-0.61	-2.07	-1.46	0.61	-0.1	-0.66	-0.38	-2.5	-0.46	-0.98	-0.84	-1.58		-0.76	-0.92	-0.44	1.29	0.13	-0.53	1.71	-1.91	-2.25
GENE5092X	IMAGE:2019101	307305 AGT angiotensinogen (serine (or cysteine) proteinase inhibitor, clade A (alpha-1 antiproteinase, antitrypsin), member 8) Hs.3697 AI359985	1	0.49		-2.09	1.13	-0.45	-0.17	-0.6	-1.27	0.87	1.14	0.48	3.29	0.17	0.57	-2.43	-2.38	0.6	-0.65	0.82	0.84	-0.15	-1.65	-0.52	0.59	0.08	-1.91	-0.52	0.7	-1.1	-1	-0.43	-0.82	-0.34	-0.64	-0.68	-0.73	-1.11	0.67	-0.76	-0.74	0.2	-0.1	-0.56	1.71	-1.52	-1.86
GENE5299X	IMAGE:2019116	308589 SOX3 SRY (sex determining region Y)-box 3 Hs.157429 AI359981	1	0.61	0.02	-1	0.55	-0.27	-0.11	-0.24	-0.6	0.7	1.11	0.32	2.65		0.62	-1.36	-1.46	0.33	-0.7	0.57	0.71	-0.39	-1.53	-0.23	0.51	0.28	-1.01	-0.56	0.33	-0.62	-1.02	-0.35	-0.32	-0.77	-0.45	-0.62	-0.86	-0.67	-0.43	-0.2	-0.24	0.64	0.16	-0.29	1.22	-1.12	-1.82
GENE4327X	IMAGE:744050	223647 PSCD3 pleckstrin homology, Sec7 and coiled/coil domains 3 Hs.7984 AA629264	1	0.03	-0.44	-0.73	-0.63	0	-0.98	-0.33	0.15	0.68	1.52	0.43	-0.04	-0.02	0.5	-0.44	-0.57	0.43	0.03	-0.36	0.22	0.06	-0.54	-0.32	0.54	-0.04	0.61	0.15	0.35	-0.09	-0.56	-0.61	0.26	-0.61	-0.01	-0.3	0.75	-0.45	0.05	-0.37	0.87	0.89	0.02	-0.1	-0.49	0.19	-1.36
GENE2570X	IMAGE:140806	114808 PAM peptidylglycine alpha-amidating monooxygenase Hs.83920 R66309	1	0.28	0.02	-0.48	-0.96	-0.55	-1.43	-0.26	-1.03	-1.09	0.96	-0.01	-0.6	-0.43	-0.9	-1.88	-0.38	0.22	-0.84	0.07	-1.05	-0.19	-0.07	-0.12	-0.36	0.2	0.91	0.26	0.29	-0.75	-0.65	-0.15	-0.76	-0.23	-0.12	0.11	0.65	0.52	0.12	-0.06	0.42	0.08	-0.99	0.46	-0.61	-1.1	-1.82
GENE2532X	IMAGE:796170	114590 ESTs Hs.16578 AA461086	1	0.15	0.45	-0.38	0.11	-0.55	-0.68	0.07	-1.24	-0.79	0.14	0.54	-1.51	-1.3	-0.97	-0.91	-0.12	0.64	-0.07		-0.99	-0.23	-0.18	-1.11	-0.29	-0.15	0.35	1.26	0.48	-0.18	-0.21	0.58	0.71	-0.22	-0.03	-0.31		-0.59	-0.73	-0.28	0.14	0.25	-0.19	0.79	0.22	-0.77	-1.23
GENE4824X	1240538	226366 ESTs Hs.333294 AA780997	1	0.03	0.32	-0.13	0.05	-0.44	-0.5	-0.33			0.3	0.15	-1.01	-0.99	-1.34	-0.47	0.82	0.32	-0.6	-0.6	-0.44	0.07	-0.57	-0.48	-0.14	-0.1	-0.12	1.32	0.8	-0.02	0.05	1.21	0.83	0.28	0.29	0.3		-0.37	-0.67	-0.27	0.39	0.46	-0.1	0.98	-0.03	0	-0.7
[truncated: 5,494 more rows]
[truncated: 80 more columns]
